# Supplementary material for: Identification of crucial genes in abdominal aortic aneurysm by WGCNA
Source: PeerJ. 2019 Oct 8;7:e7873. doi: 10.7717/peerj.7873 (PMC6788446; doi:10.7717/peerj.7873)
Supplement: Supplemental Information 7 [file peerj-07-7873-s007.xlsx]

## Sheet: Sheet1
Table S2 GO-BP terms for modules on AAA condition and normal condition
AAA	GO ID	GO terms	Count	-logP	Genes	Normal	GO ID	GO terms	Count	-logP	Genes
	black						brown
	GO:0007165	signal transduction	23	4.47812	ITGAL, ITK, IL2RB, SPOCK2, TNFRSF17, IL7R, CD72, STK4, SLAMF1, CD48, CD38, CARD11, LPXN, PNOC, RAC2, RASAL3, CD79B, CD4, INPP5D, HLA-DOB, LTB, LTA, ARHGAP9		GO:0001525	angiogenesis	17	7.19586	PTPRB, RAMP2, EMCN, TNFRSF12A, EFNA1, RASIP1, APOLD1, EPHB4, APOD, ID1, TEK, ROBO4, NOS3, SOX18, TMEM100, ANGPT2, ADAM15
	GO:0006955	immune response	21	10.5384	HLA-DQB1, CR2, CD8A, GZMA, VPREB3, MAP4K2, IL7R, CCR7, CXCR5, CXCL13, LAX1, ICOS, IRF8, CD79B, CD4, SEMA4D, HLA-DOB, LTB, CD27, LTA, CD7		GO:0007155	cell adhesion	16	2.8226	CTNNAL1, SELP, ICAM2, EFNB2, MMRN1, EPHB4, CDH5, PCDH18, LAMA2, VWF, LYVE1, CD34, RELN, CD24, THBS4, SPON1
	GO:0002250	adaptive immune response	15	11.411	ITK, TNFRSF13B, TNFRSF13C, EOMES, TNFRSF17, SKAP1, SH2D1A, LAX1, FYN, LIME1, CD79B, CD4, CD79A, CD6, CD7		GO:0045893	positive regulation of transcription, DNA-templated	14	1.63464	EGR1, TESC, CNBP, SFRP1, ETS1, RAN, AGT, SMAD3, IGF1, AFAP1L2, SOX18, PHF5A, PPARGC1A, MYC
	GO:0007166	cell surface receptor signaling pathway	15	7.87186	CD8A, CD3D, CD3E, TNFRSF13B, CD247, EVL, BIRC3, IL7R, CD37, CD19, CXCL13, CD2, GP1BA, CD4, CD27		GO:0008285	negative regulation of cell proliferation	13	2.10791	TESC, RARRES1, PODN, IFITM1, CDH5, SLIT3, CCL23, MSX1, SFRP1, SFRP2, ETS1, NOS3, TOB1
	GO:0007155	cell adhesion	13	3.85538	PARVG, ITGAL, LPXN, SELL, ITGB7, ICAM3, CD2, CD4, GP1BA, SEMA4D, CD24, CD72, SLAMF1		GO:0007166	cell surface receptor signaling pathway	12	2.88724	CLEC1A, IL17D, SEMA6A, PRMT1, TNFSF10, IFITM1, TSPAN3, AGT, EDN1, LIFR, TSPAN13, TSPAN7
	GO:0043547	positive regulation of GTPase activity	13	3.0438	SMAP2, IL2RB, FYN, ACAP1, RASAL3, RAPGEF6, PSD4, DOCK8, SEMA4D, DENND2D, RAPGEFL1, FGD3, ARHGAP9		GO:0006810	transport	11	1.69334	ABCA8, LAPTM4B, RBP7, LYVE1, TMED2, SMAD3, TMED10, ENSA, PMP2, GJA4, DYNLRB1
	GO:0050852	T cell receptor signaling pathway	12	7.94473	HLA-DQB1, ITK, CARD11, CD3D, FYN, CD3E, PLCG2, CD247, LIME1, CD4, INPP5D, SKAP1		GO:0045766	positive regulation of angiogenesis	10	4.58264	RAMP2, SASH1, CD34, ETS1, SFRP2, C6, TEK, NOS3, AQP1, ANGPT2
	GO:0050776	regulation of immune response	12	7.1146	CARD11, ITGAL, SH2D1A, CD19, CD3D, CD8A, CD3E, SELL, ITGB7, CD247, ICAM3, SLAMF6		GO:0001666	response to hypoxia	10	3.25048	EGR1, RAMP2, ETS1, TEK, APOLD1, SMAD3, PDLIM1, CD24, ANGPT2, ITPR1
	GO:0045087	innate immune response	11	2.90354	ITK, SH2D1A, CORO1A, CR2, FYN, BLK, MAP4K2, SLAMF6, CD6, SLAMF1, ZBP1		GO:0007267	cell-cell signaling	10	2.10898	TNFSF10, CCL23, CXCL14, SFRP2, EFNA1, AGT, EDN1, EFNB2, TEK, GJA4
	GO:0042110	T cell activation	10	10.3128	CD48, ITK, CD8A, FYN, CD3E, CD2, IRF4, ADA, HSH2D, CD7		GO:0010628	positive regulation of gene expression	10	2.0234	RAMP2, TESC, TMED2, CD34, ID1, SMAD3, HSPA1B, MYC, OLFM1, RPS3
	GO:0031295	T cell costimulation	10	8.26874	HLA-DQB1, CARD11, CD3D, FYN, CD3E, ICOS, CD247, TNFRSF13C, CD4, CD24		GO:0007411	axon guidance	9	2.8367	LAMA2, MATN2, FLRT2, SEMA6A, EFNA1, EFNB2, RELN, NGFR, SLIT3
	GO:0035556	intracellular signal transduction	10	2.54255	ITK, FYN, LAX1, BLK, PLCG2, MAP4K2, MAP4K1, INPP5D, ASB16, STK4		GO:0001701	in utero embryonic development	9	2.40047	PRMT1, MSX1, C6, EDN1, SMAD3, SOX18, NOS3, TMEM100, MYC
	GO:0043066	negative regulation of apoptotic process	9	1.72574	CD38, IL2RB, BLK, LEF1, SEMA4D, PIM2, BIRC3, CD27, PLAC8		GO:0030198	extracellular matrix organization	9	2.27882	LAMA2, VWF, CRISPLD2, ICAM2, OLFML2A, DCN, JAM2, VIT, DNAJB6
	GO:0050853	B cell receptor signaling pathway	8	6.89678	CD38, CD19, KLHL6, BLK, PLCG2, LIME1, CD79B, CD79A		GO:0006886	intracellular protein transport	9	1.81945	RAMP3, RAMP2, AP2B1, TMED2, RAN, IPO5, ARCN1, TMED10, NGFR
	GO:0007169	transmembrane receptor protein tyrosine kinase signaling pathway	7	4.13086	ITK, CD8A, FYN, CD3E, BLK, CD4, CD7		GO:0090090	negative regulation of canonical Wnt signaling pathway	8	2.16948	EGR1, GPC3, SFRP1, PRICKLE1, SFRP2, SNAI2, IGFBP4, TMEM88
	GO:0033209	tumor necrosis factor-mediated signaling pathway	7	3.63687	TNFRSF13B, TNFRSF13C, TNFRSF17, BIRC3, LTB, CD27, LTA		GO:0042981	regulation of apoptotic process	8	1.5852	INHBB, EGR1, ETS1, ROBO4, GAS1, NGFR, RPS3, CARD10
	GO:0032496	response to lipopolysaccharide	7	2.88152	CCR7, CXCL13, IL10RA, PLCG2, CD6, CD27, LTA		GO:0006364	rRNA processing	8	1.57561	RPL30, IMP3, RPLP0, RPL15, DDX21, RPL12, RPS2, RPS3
	GO:0042102	positive regulation of T cell proliferation	6	4.11403	CARD11, CORO1A, CD3E, TNFRSF13C, CD4, CD6		GO:0014068	positive regulation of phosphatidylinositol 3-kinase signaling	7	3.61516	SELP, AGT, TEK, IGF1, RELN, DCN, MYOC
	GO:0050900	leukocyte migration	6	2.69122	CD48, ITGAL, FYN, SELL, CD2, INPP5D		GO:0006614	SRP-dependent cotranslational protein targeting to membrane	7	2.76216	SRP14, RPL30, RPLP0, RPL15, RPL12, RPS2, RPS3
	GO:0007204	positive regulation of cytosolic calcium ion concentration	6	2.51435	CD38, CCR7, CXCR4, CXCL13, CD52, CD24		GO:0000184	nuclear-transcribed mRNA catabolic process, nonsense-mediated decay	7	2.2531	RPL30, RPLP0, RPL15, CASC3, RPL12, RPS2, RPS3
	GO:0043123	positive regulation of I-kappaB kinase/NF-kappaB signaling	6	2.17776	CARD11, CCR7, FYN, UBD, PIM2, BIRC3		GO:0030308	negative regulation of cell growth	7	2.21834	MSX1, SFRP1, SFRP2, AGT, SMAD3, ADAM15, SLIT3
	GO:0048535	lymph node development	5	5.21752	CXCR5, CXCL13, IL7R, LTB, LTA		GO:0050821	protein stabilization	7	1.97962	TESC, MSX1, SMAD3, IGF1, HSPA1B, PPARGC1A, TMEM88
	GO:0030890	positive regulation of B cell proliferation	5	3.73304	CARD11, CD38, TNFRSF13C, TCF3, ADA		GO:0032496	response to lipopolysaccharide	7	1.61718	SELP, KCNJ8, EDN1, NGFR, DCN, GNG12, MGST1
	GO:0006909	phagocytosis	5	3.38114	ITGAL, CORO1A, IRF8, ICAM3, SLAMF1		GO:0050776	regulation of immune response	7	1.46508	IFITM1, CD34, ICAM2, HLA-A, CD300LG, SMAD3, FKBP1A
	GO:0030183	B cell differentiation	5	2.85647	CR2, PLCG2, CD79B, CD79A, TCF3		GO:0045765	regulation of angiogenesis	6	4.25886	SFRP1, ID1, ENPP2, TNFRSF12A, ETS1, EFNA1
	GO:0001666	response to hypoxia	5	1.42307	CD38, CXCR4, CD24, LTA, ADA		GO:0016525	negative regulation of angiogenesis	6	2.82555	AGT, TEK, DCN, ANGPT2, GPR4, THBS4
	GO:0042127	regulation of cell proliferation	5	1.3263	ITK, FYN, CXCL13, BLK, CD27		GO:0050731	positive regulation of peptidyl-tyrosine phosphorylation	6	2.29495	ENPP2, EFNA1, AGT, IGF1, RELN, THBS4
	GO:0045086	positive regulation of interleukin-2 biosynthetic process	4	4.09474	CARD11, CD3E, CD4, IRF4		GO:0001822	kidney development	6	2.20777	ODC1, AGTR1, KCNJ8, AGT, TMED10, DCN
	GO:0050850	positive regulation of calcium-mediated signaling	4	3.39886	CD8A, CD3E, CD4, ADA		GO:0030336	negative regulation of cell migration	6	2.02889	RAP2A, PODN, SFRP1, IFITM1, SFRP2, ADAM15
	GO:0042113	B cell activation	4	2.91386	CXCR5, LAX1, BANK1, CD79A		GO:0016337	single organismal cell-cell adhesion	6	1.92116	EMCN, CD34, ICAM2, CD24, JAM2, CDH5
	GO:0030217	T cell differentiation	4	2.87042	CD3D, GPR18, CD4, IL7R		GO:0002576	platelet degranulation	6	1.88705	SELP, VWF, F13A1, IGF1, MMRN1, TIMP3
	GO:0042100	B cell proliferation	4	2.78809	CR2, LEF1, CD79A, IL7R		GO:0019083	viral transcription	6	1.7436	RPL30, RPLP0, RPL15, RPL12, RPS2, RPS3
	GO:0032729	positive regulation of interferon-gamma production	4	2.33461	CD3E, IRF8, SLAMF6, LTA		GO:0019221	cytokine-mediated signaling pathway	6	1.48563	FLRT2, PODN, SOCS2, LIFR, FKBP1A, DCN
	GO:0046330	positive regulation of JNK cascade	4	1.9192	CCR7, MAP4K2, SLAMF1, CD27		GO:0010629	negative regulation of gene expression	6	1.41458	SFRP1, CD34, SFRP2, AGT, OLFM1, SLIT3
	GO:0016337	single organismal cell-cell adhesion	4	1.41949	ICOS, ICAM3, CD2, CD24		GO:0006413	translational initiation	6	1.41458	RPL30, RPLP0, RPL15, RPL12, RPS2, RPS3
	GO:0002223	stimulatory C-type lectin receptor signaling pathway	4	1.37741	CARD11, FYN, PLCG2, ICAM3		GO:0042552	myelination	5	2.46822	MALL, CLDN5, CMTM8, PLLP, MAL
	GO:0001771	immunological synapse formation	3	2.6374	CORO1A, DOCK8, CD6		GO:0010595	positive regulation of endothelial cell migration	5	2.46822	SASH1, ETS1, AGT, EDN1, TEK
	GO:0071345	cellular response to cytokine stimulus	3	1.95191	CCR7, CXCR4, LEF1		GO:0008217	regulation of blood pressure	5	1.93651	RAMP2, CD34, AGT, EDN1, NOS3
	GO:0050690	regulation of defense response to virus by virus	3	1.75042	FYN, CD247, CD4		GO:0050729	positive regulation of inflammatory response	5	1.76639	AGTR1, CCL23, ETS1, AGT, PLA2G2A
	GO:0038083	peptidyl-tyrosine autophosphorylation	3	1.46046	ITK, FYN, BLK		GO:0006869	lipid transport	5	1.70847	ABCA8, APOD, APOLD1, ANO6, SLCO2A1
	GO:0002636	positive regulation of germinal center formation	2	1.66124	TNFRSF13C, ADA		GO:0006816	calcium ion transport	5	1.70847	RAMP3, RAMP2, SLN, GJA4, ITPR1
	GO:0001787	natural killer cell proliferation	2	1.66124	SLAMF6, SLAMF1		GO:0001558	regulation of cell growth	5	1.63555	AGTR1, FAM107A, SOCS2, AGT, IGFBP4
	GO:0033632	regulation of cell-cell adhesion mediated by integrin	2	1.66124	FERMT3, ADA		GO:0048013	ephrin receptor signaling pathway	5	1.53444	AP2B1, EFNA1, EFNB2, CRK, EPHB4
	GO:0002925	positive regulation of humoral immune response mediated by circulating immunoglobulin	2	1.53787	FCER2, LTA		GO:0032355	response to estradiol	5	1.45688	RAMP2, IFI27, SOCS2, ETS1, MYC
	GO:0030260	entry into host cell	2	1.53787	CXCR4, CD4		GO:0007179	transforming growth factor beta receptor signaling pathway	5	1.44203	ID1, CLDN5, SMAD3, FKBP1A, CDH5
	GO:0072540	T-helper 17 cell lineage commitment	2	1.44254	SLAMF6, IRF4		GO:0008584	male gonad development	5	1.41296	TESC, TNFSF10, SFRP1, SFRP2, ADAM15
	GO:0060706	cell differentiation involved in embryonic placenta development	2	1.36493	EOMES, STK4		GO:0071456	cellular response to hypoxia	5	1.3847	HYOU1, SFRP1, EDN1, AQP1, PPARGC1A
	blue						GO:0006469	negative regulation of protein kinase activity	5	1.34373	FLRT2, TESC, PODN, SOCS2, DCN
	GO:0007165	signal transduction	131	2.58564	ADCY3, GNA13, TSPO, SLC44A2, GNA11, S100A9, RPS6KB1, CD53, CXCL12, IQGAP1, TMEM9B, MYD88, RALB, RALA, NSMAF, NET1, PTPRM, SPARCL1, OPTN, NPC1, GAPVD1, MAPK6, IGBP1, PDGFRB, ROR2, PPP2R5E, OSTF1, HLA-DRB3, HDGF, CDC42SE1, CCL8, MYO9B, NOSTRIN, CXXC5, GREM1, ALCAM, LGALS3BP, CD69, TEK, HLA-DRB4, HLA-DOA, ANKDD1A, CSF1R, CAMLG, EPAS1, PHB, LGALS1, CD300C, GAS6, CORO1C, CBLB, TNFSF10, LYVE1, RGS1, ZN…		GO:0001766	membrane raft polarization	4	3.88654	MALL, CMTM8, PLLP, MAL
	GO:0045944	positive regulation of transcription from RNA polymerase II promoter	105	1.55726	MEF2C, LMO2, LMO4, EDN1, MORF4L2, TGFB3, JAG1, APP, H2AFZ, RPS27A, PID1, STRN3, DLL1, MTF2, IGBP1, SLC40A1, SMARCA4, CNBP, HMGB2, BMPR2, CHCHD2, C14ORF166, GREM1, SRF, NR1H2, HOXA5, JUND, TEF, AUTS2, TFDP1, ASXL2, EPAS1, MAFB, SUB1, TAF7, SMAD4, SMYD3, SMAD3, TEAD2, DDX5, USF1, RBMX, NOTCH1, HDAC2, HDAC1, WDR61, SFRP2, ETS1, ETS2, EBF1, EAF2, PARP1, ENG, ELF1, COPS5, HEXB, RHOQ, ZEB2, NFKB1, HSPH…		GO:0051894	positive regulation of focal adhesion assembly	4	2.56725	SFRP1, TEK, SMAD3, MYOC
	GO:0055114	oxidation-reduction process	73	2.47348	LDHB, LDHA, PXDN, PGD, PRDX4, FDFT1, PTGIS, PLOD1, PLOD2, GPX4, CH25H, GPX3, CREG1, VKORC1, LOX, KDM5B, GFOD1, HIGD1A, OXR1, SH3PXD2A, NCF1, CYB5A, CYB5B, CDO1, TECR, DHDH, DHRS7, ADO, DHRS3, RRM1, TXN, CYBRD1, TXNRD1, PCYOX1, KIAA1191, ALDH9A1, HIGD2A, DEGS1, PAM, TMX1, GLRX5, CYP1B1, ALDH18A1, GLUD1, UGDH, SESN1, ALDH1A1, GPD1L, VCAM1, GSTK1, CYP26B1, HSD17B7, NOX4, ALKBH7, GDI2, NDUFA8, NDUFA4…		GO:0061098	positive regulation of protein tyrosine kinase activity	4	2.29769	AGT, RELN, AFAP1L2, CD24
	GO:0006915	apoptotic process	67	1.90023	MEF2C, TSPO, S100A9, RBM5, EIF5A, GJA1, BNIP3, RPS6KB1, NFKB1, PTEN, RPS3, TMEM173, DAB2, GHITM, MYD88, MAP3K8, C8ORF4, RALB, API5, CIB1, NCF1, ARHGEF6, CST3, BCL2L13, DAPK1, PRKD1, EPB41L3, RNF130, C1QBP, BNIP2, CLIC4, TNFAIP3, PPP1R15A, THOC1, TNFRSF21, POLR2G, GPR65, GREM1, ZFP36L1, PEA15, MAP3K1, MTCH1, DAD1, CFLAR, AIMP2, LGALS1, RYBP, TMBIM4, FAM188A, RAF1, MAL, STAT1, GAS6, SEMA6A, TNFSF10…		GO:0006259	DNA metabolic process	4	2.29769	RAN, NT5E, DNASE1L3, IGFBP4
	GO:0007155	cell adhesion	65	3.76563	CTNNAL1, ATP1B1, NUAK1, IGFBP7, POSTN, CD151, MMRN1, DDR2, CXCL12, CD47, APP, SRPX, CTGF, FAP, CLEC4A, SPON1, CIB1, ICAM2, FLOT2, EFNB2, SIGLEC10, CERCAM, SSPN, RND3, CD36, VCAN, LAMC1, MFAP4, IBSP, CYP1B1, GNE, NINJ1, IL32, SPOCK1, CDH2, EPHB4, ITGAM, CDH5, ALCAM, VCAM1, CD9, LGALS3BP, LAMB2, ITGAV, FAT1, COL6A3, THBS1, ENTPD1, COL8A1, THBS2, THBS4, SELP, COL15A1, COL16A1, GAS6, PCDH18, LAMA2, V…		GO:0050919	negative chemotaxis	4	1.97001	FLRT2, SEMA6A, SEMA3G, SLIT3
	GO:0043066	negative regulation of apoptotic process	64	3.63795	AIF1, MMP9, BNIP3, RPS6KB1, NFKB1, PTEN, SPRY2, DAB2, MYD88, RPS3A, PAX7, EEF2K, CAT, RPS27A, HIGD1A, API5, CIB1, IRAK1, BNIP2, CCND2, TXNDC5, CFL1, PDGFRB, UBB, PIAS1, EIF2AK2, SLC40A1, GSTP1, HIGD2A, MTDH, MGMT, PPT1, GREM1, MIF, PHIP, ERCC5, XBP1, TEK, DAD1, DNAJA1, GLO1, THBS1, DNAJA3, HSPA9, CSF1R, CFLAR, TMBIM6, TMBIM4, RAF1, SMAD3, IGF1, ANXA5, PARK7, GAS6, LEP, HSP90B1, PSMG2, CDKN1B, HDA…		GO:0045668	negative regulation of osteoblast differentiation	4	1.80747	SFRP1, ID1, SMAD3, TOB1
	GO:0006412	translation	61	12.065	RPL17, RPL19, MRPS33, COPS5, RPL15, RPS2, RPS3, RPS3A, RPLP0, RPLP1, SLC25A28, RPL12, MRPL34, RPS27A, RPL36AL, RPL35A, MRPL51, SLC25A5, MRPS6, TARS, RPS18, MRPS9, RPS17, RPS14, RPS12, RPS4Y1, RPS13, PELO, EIF2AK2, MRPS17, NACA, RPL27A, RPS15A, RPL39, MRPL20, RPS25, MRPL13, RPL30, RPS29, RPL7, MRPL15, RPL31, RPL9, MRPL17, MRPL18, RPL5, RPL10A, RSL24D1, RPL4, RPS21, RPS23, MRPS24, RPL26, RPS9, RPL2…		GO:0046426	negative regulation of JAK-STAT cascade	4	1.77787	FLRT2, PODN, SOCS2, DCN
	GO:0008284	positive regulation of cell proliferation	61	2.6989	MARCKSL1, EDN1, EIF5A, PTEN, SSR1, CD47, S1PR3, CTGF, PDGFC, PDGFD, RHOG, CIB1, STX4, CAPNS1, LYN, SLC25A5, EFNB2, CST3, LIFR, DLL1, CDK4, SUZ12, TNS3, TNFSF13B, ADM, CCND2, PDGFRA, PDGFRB, SDCBP, MCTS1, DERL2, CNBP, CD248, RPS15A, GREM1, PHIP, FOLR2, XBP1, TSPAN31, ITGAV, PTN, THBS1, DNAJA2, CSF1R, ODC1, SHMT2, TBX2, HCLS1, RPS9, IGF1, LEP, NOTCH1, CDKN1B, HDAC2, SFRP1, HDAC1, SFRP2, ETS1, BAMBI…		GO:0071377	cellular response to glucagon stimulus	4	1.77787	ADCY4, ADCY1, GNG11, GNG12
	GO:0006954	inflammatory response	54	3.25362	RARRES2, LXN, AIF1, S100A9, NFKB1, CXCL12, S1PR3, TNFRSF11B, MYD88, SERPINA3, SYK, PIK3CG, LYN, LY96, LYZ, TNFRSF14, CDO1, PRKD1, PRKCQ, PPBP, TNFAIP3, TNFRSF21, C3AR1, C3, GSDMD, CXCL9, FPR1, CCL8, FPR3, CCL5, MIF, IL17D, FOLR2, IL10RB, CCL21, CYP26B1, THBS1, CSF1R, SCG2, NOX4, SELP, LIPA, AXL, CCL19, TRIL, PARK7, HNRNPA0, CYBA, P2RX7, CCL13, CYBB, AOX1, PLA2G4C, CD14		GO:0043408	regulation of MAPK cascade	4	1.74913	INHBB, ID1, CD24, MYOC
	GO:0006955	immune response	54	2.25625	PXDN, HLA-DMB, HLA-DMA, CXCL12, C1QC, B2M, TNFRSF11B, PTGER4, HLA-A, TNFRSF14, CTSS, HLA-B, WAS, HLA-F, IGSF6, CD36, TNFSF13B, PPBP, C1QBP, SLPI, HLA-DPA1, CTSG, HLA-DRA, TNFRSF21, IFITM2, ENPP2, C3, HLA-DRB3, GPR65, CXCL9, CCL8, IL32, C1R, CCL5, XBP1, CCL21, IL10RB, FCGR1A, HLA-DRB4, HLA-DRB5, HLA-DPB1, HLA-DOA, THBS1, SMAD3, CCL19, TRIM22, NOTCH1, TNFSF10, CCL13, RGS1, CXCL14, ETS1, TGFBR3, ADA…		GO:0048146	positive regulation of fibroblast proliferation	4	1.43749	AGT, IGF1, AQP1, MYC
	GO:0006413	translational initiation	51	18.4887	RPL17, RPL19, COPS5, RPL15, RPS2, RPS3, RPS3A, RPLP0, RPLP1, EIF1AY, RPL12, RPS27A, RPL35A, RPS18, RPS17, EIF4A2, RPS14, EIF4A1, RPS12, RPS13, RPS4Y1, RPL27A, RPS15A, RPL39, RPS25, RPL30, EIF3A, RPL7, EIF3G, RPS29, RPL31, EIF3E, RPL9, EIF3F, EIF3K, RPL5, RPL10A, PABPC1, RPL4, RPS21, RPS23, RPL26, RPS9, RPL27, RPL23A, RPL24, EIF2B1, RPS5, EIF4B, RPL22, EIF4E2		GO:0001570	vasculogenesis	4	1.39765	RAMP2, RASIP1, SOX18, TMEM100
	GO:0006364	rRNA processing	51	9.91436	RPL17, RPL19, RPL15, SKIV2L2, RPS2, RPS3, EBNA1BP2, DKC1, RPS3A, RPLP0, RPLP1, DDX21, RPL12, IMP4, RPS27A, RPL35A, EXOSC8, EXOSC6, RPS18, RPS17, RPS14, RPS12, RPS4Y1, RPS13, NOL11, RPL27A, RPS15A, RPL39, RPS25, DDX47, RPL30, RPL7, RPS29, RPL31, FRG1, RPL9, RPL5, RPL10A, RPL4, RPS21, RPS23, RPL26, RPS9, RPL27, RPL23A, RPL24, RPS5, FBL, RPL22, NOP58, UTP14C		GO:0006749	glutathione metabolic process	4	1.39765	GSTM3, EEF1G, GLO1, MGST1
	GO:0098609	cell-cell adhesion	50	5.97358	HSP90AB1, LIMA1, LDHA, CHMP5, RPL15, RPS2, IQGAP1, EFHD2, ARHGAP1, LRRFIP1, CLINT1, GOLGA3, ARGLU1, PFKP, EEF2, FLNB, GAPVD1, TACSTD2, RARS, SERBP1, USO1, SDCBP, EEF1G, MAPRE1, RAB10, CNN3, SNX2, HCFC1, HSPA1A, TAGLN2, CHMP2B, PSMB6, ATIC, EIF3E, PCMT1, EHD4, COBLL1, ZC3H15, SWAP70, FSCN1, RPL23A, RPL24, STAT1, PARK7, TMEM2, TMEM47, TJP1, LASP1, CCT8, PTPN1		GO:0009612	response to mechanical stimulus	4	1.34106	INHBB, ETS1, DCN, ANGPT2
	GO:0042493	response to drug	50	4.55927	XRCC5, SRP14, LDHA, TSPO, RPS6KB1, UQCRFS1, SRP19, CBX7, PTEN, B2M, TNFRSF11B, SLC1A3, APOD, CAT, LOX, HADH, PTPRM, LYN, CST3, CDK4, NPC1, CCND1, SRP72, PAM, HMGB2, MGMT, HMGCS1, ACSL1, JUND, DAD1, PTN, THBS1, LPL, CARD9, LGALS1, ACACB, DPYSL2, SOD1, STAT1, CYBA, P2RX7, TJP1, CYBB, CDKN1B, HDAC2, SFRP1, HDAC1, SFRP2, HTR2B, HTR2A		GO:0050679	positive regulation of epithelial cell proliferation	4	1.32299	SFRP1, ID1, IGF1, MYC
	GO:0008285	negative regulation of cell proliferation	50	1.99238	RARRES3, RARRES1, IGFBP7, IGFBP6, TGFB3, RBM5, PTEN, SPRY2, CUL5, SERPINE2, CIB1, GTPBP4, LYN, DLL1, MXD4, SSTR2, ADM, BTG1, ROR2, EMP3, EIF2AK2, PMP22, PODN, CYP1B1, IFITM1, SRF, CDH5, CD9, PKD2, DNAJA3, CSF1R, NOX4, CEBPA, AIMP2, PHB, SMAD4, RAF1, TAX1BP3, FRZB, CDH13, NOTCH1, CDKN1B, SFRP1, HDAC1, SFRP2, ETS1, SFRP4, IRF1, JAK2, TP53INP1		GO:0048661	positive regulation of smooth muscle cell proliferation	4	1.32299	EDN1, IGF1, MYC, PPARGC1A
	GO:0015031	protein transport	49	1.81699	ENY2, RAB9A, CHMP5, UNC50, VPS37C, DAB2, DNAJC15, NECAP2, NECAP1, CALCRL, RAB21, RAMP3, KDELR2, RAB3IL1, SPIRE1, YIF1A, PITPNM1, CCDC53, VAMP2, SNX10, SERP1, COPZ2, VPS29, SDAD1, NACA, KIAA0196, PPT1, SNX4, ARF5, CHMP2B, SFT2D1, TMED7, TMED4, TRAM2, TMED5, XBP1, TMED3, TRAM1, NMD3, PIK3R2, GABARAPL2, GDI2, RHBDF1, CD63, TMED9, HSP90B1, RABEP1, CNIH4, RAB22A		GO:2001214	positive regulation of vasculogenesis	3	2.11789	RAMP2, CD34, TMEM100
	GO:0008283	cell proliferation	47	2.01966	BCAT1, PTGES3, XRCC5, TSPO, UCHL1, HDGF, TXLNA, PTEN, HDGFRP3, MIF, GPC4, EDNRA, ZFP36L1, DAB2, CUL5, DKC1, CREG1, TFDP1, CSF1R, SYK, KHDRBS1, LIPA, PDXK, FSCN1, RHBDF1, SMAD4, IGF1, RAF1, RPL23A, RBBP7, GAS6, TACC1, PRKD1, TNFSF13B, SERPINF1, EPS8, TACSTD2, GOLPH3, TXN, H3F3A, TXNRD1, H3F3B, PELO, MAPRE1, ALKBH3, BIN1, MYH10		GO:0034374	low-density lipoprotein particle remodeling	3	2.03461	AGTR1, AGT, PLA2G2A
	GO:0006614	SRP-dependent cotranslational protein targeting to membrane	42	18.5959	SRP14, RPL17, RPL19, RPL15, RPL27A, RPS15A, SRP19, RPS2, RPL39, RPS3, RPS25, RPL30, RPS29, RPL7, RPS3A, RPL31, RPLP0, RPL9, RPLP1, RPL5, RPL4, RPL10A, RPL12, RPS21, RPS27A, RPS23, RPL35A, RPL26, RPL27, RPS9, RPL24, RPL23A, SRPRB, RPS5, RPS18, RPS17, RPL22, RPS14, RPS12, RPS13, RPS4Y1, SRP72		GO:0003198	epithelial to mesenchymal transition involved in endocardial cushion formation	3	1.89059	MSX1, TMEM100, SNAI2
	GO:0043065	positive regulation of apoptotic process	42	2.46969	LDHA, TSPO, CYP1B1, RBM5, TGFB3, BNIP3, MOAP1, HOXA5, MTCH1, DNAJA1, PTN, FAM162A, NSMAF, TOP2A, ANO6, DNAJA3, RPS27A, NET1, ZNF622, NOX4, ARHGEF6, ARHGEF18, SAP18, FRZB, CDK4, SOD1, SLIT2, NCSTN, NOTCH1, TNFSF10, SFRP1, C1QBP, ADM, SFRP2, SFRP4, BNIP3L, MLLT11, MNDA, PDGFRB, ID3, UBB, BIN1		GO:0022011	myelination in peripheral nervous system	3	1.82749	LAMA2, LGI4, MYOC
	GO:0030198	extracellular matrix organization	41	6.36616	IBSP, PXDN, ADAMTSL2, LUM, COL3A1, PRDX4, POSTN, DCN, DDR2, ABI3BP, ITGAM, VCAM1, CD47, APP, TNFRSF11B, LAMB2, CRISPLD2, ITGAV, COL6A3, LOX, COL8A1, THBS1, COL8A2, COL10A1, RECK, ICAM2, FBN1, OLFML2A, ECM2, COL16A1, COL5A2, LAMA2, VWF, LAMA4, COL14A1, COL1A2, VCAN, LAMC1, JAM2, JAM3, DNAJB6		GO:0010744	positive regulation of macrophage derived foam cell differentiation	3	1.71504	AGTR1, AGT, PLA2G2A
	GO:0016032	viral process	41	2.26386	PSMB10, NACA, TSPAN7, SYNCRIP, C14ORF166, RNGTT, RBX1, VCAM1, PSMB4, PSMB7, CUL5, PSMB6, SET, PSMB1, CD93, COPB1, PSMB2, GTF2A2, RALA, TRAM1, SYK, CEBPA, CFLAR, CAMLG, LYN, SLC25A5, NUP88, HLA-A, HLA-B, SPEN, C1QBP, HDAC1, PSMA4, EIF4A2, NUP205, PSMA3, EIF4A1, PDGFRA, TCEB1, BIN1, HLA-DRA		GO:0010613	positive regulation of cardiac muscle hypertrophy	3	1.71504	AGT, EDN1, IGF1
	GO:0019083	viral transcription	40	13.7233	RPL17, RPL19, RPL15, RPL27A, RPS15A, RPS2, RPL39, RPS3, RPS25, RPL30, RPS29, RPL7, RPS3A, RPL31, RPLP0, RPL9, RPLP1, RPL5, RPL4, RPL10A, RPL12, RPS21, RPS23, RPS27A, RPL35A, NUP88, RPL26, RPL27, RPS9, RPL24, RPL23A, RPS5, RPS18, RPS17, RPL22, RPS14, NUP205, RPS12, RPS13, RPS4Y1		GO:0006171	cAMP biosynthetic process	3	1.66452	RAMP2, ADCY4, ADCY1
	GO:0000184	nuclear-transcribed mRNA catabolic process, nonsense-mediated decay	40	12.7431	RPL17, RPL19, RPL15, RPL27A, RPS15A, RPS2, RPL39, RPS3, RPS25, RPL30, RPS29, RPL7, RPS3A, RPL31, RPLP0, EIF3E, RPL9, RPLP1, RPL5, RPL4, RPL10A, PABPC1, RPL12, RPS21, RPS23, RPS27A, RPL35A, RPL26, RPL27, RPS9, RPL24, RPL23A, RPS5, RPS18, RPS17, RPL22, RPS14, RPS12, RPS13, RPS4Y1		GO:0007043	cell-cell junction assembly	3	1.6172	CLDN5, GJA4, CDH5
	GO:0001666	response to hypoxia	37	6.06961	PAM, ATP1B1, CAV1, LDHA, AHCY, TGFB3, BNIP3, POSTN, CXCL12, SRF, SLC11A2, EDNRA, VCAM1, PLOD1, PLOD2, TEK, CAT, THBS1, EGR1, NOX4, EPAS1, CST3, SMAD4, SMAD3, RAF1, USF1, ITPR1, LEP, CYBA, HSP90B1, CDKN1B, ADM, ETS1, TGFBR3, ENG, PLAU, ALKBH5		GO:0007263	nitric oxide mediated signal transduction	3	1.57272	AGT, NOS3, RASD1
	GO:0090090	negative regulation of canonical Wnt signaling pathway	36	6.19448	PSMB10, CTHRC1, CAV1, IGFBP6, CDH2, GREM1, RBX1, PSMB4, DAB2, PSMB7, GPC3, PSMB6, PSMB1, PSMB2, PSMD7, RPS27A, EGR1, FRZB, SNAI2, PSMA2, NOTCH1, PSMC5, PSMA6, HDAC1, PRICKLE1, SFRP1, PSMA5, SFRP2, PSMA4, PFDN5, PSMA3, SFRP4, ROR2, PSME4, UBB, MAD2L2		GO:0042474	middle ear morphogenesis	3	1.53079	MSX1, EDN1, INSIG1
	GO:0000165	MAPK cascade	36	2.03681	MEF2C, PSMB10, CAV1, PLVAP, CCL5, RBX1, ZFP36L1, PEA15, PSMB4, PSMB7, PSMB6, PSMB1, RASGRP3, MAP3K1, PSMB2, TEK, SPRED1, PSMD7, RPS27A, SCG2, MAP2K2, RAF1, PSMA2, PSMC5, PSMA6, MAPK6, PSMA5, PSMA4, PSMA3, PDGFRA, PDGFRB, JAK2, PSME4, UBB, GFRA2, CALM1		GO:0019229	regulation of vasoconstriction	3	1.53079	AGTR1, AGT, EDN1
	GO:0000398	mRNA splicing, via spliceosome	35	2.94914	POLR2G, POLR2F, ZMAT2, CWC15, RBM5, SYNCRIP, SKIV2L2, BUD31, SF3B4, POLR2B, PLRG1, METTL3, FRG1, SRRM2, CDC40, LSM5, DHX15, HNRNPC, LSM2, PABPC1, DHX32, RBM22, SNRPA1, SPEN, DDX5, RBMX, HNRNPA0, SNURF, PCF11, PAPOLA, USP49, PHF5A, SNRNP27, CPSF3, SNRPG		GO:0010719	negative regulation of epithelial to mesenchymal transition	3	1.45357	SFRP1, SFRP2, EFNA1
	GO:0006886	intracellular protein transport	33	1.99902	COPZ2, VPS29, COPA, STX8, RABGAP1, TBC1D9, SNX17, AP2S1, SNX2, NAPB, COPB2, AP1S2, AP3M2, COPB1, TBC1D14, SCG5, VPS35, STX11, STX10, AP3B1, AP2M1, RAMP3, KDELR2, STX4, TBC1D2B, IPO11, BCAP31, YWHAH, SEC61B, SGSM2, USO1, VPS26A, PDCD6		GO:0002040	sprouting angiogenesis	3	1.35148	RAMP2, RSPO3, TEK
	GO:0050852	T cell receptor signaling pathway	31	4.87788	PSMB10, TNFRSF21, HLA-DRB3, NFKB1, PTEN, PSMB4, PSMB7, PSMB6, PSMB1, PSMB2, HLA-DRB4, HLA-DRB5, HLA-DPB1, PSMD7, RPS27A, PIK3R2, RFTN1, WAS, PSMA2, UBE2N, PRKCQ, PSMC5, PSMA6, PSMA5, PSMA4, NCK1, PSMA3, HLA-DPA1, UBB, PSME4, HLA-DRA		GO:0060976	coronary vasculature development	3	1.35148	AP2B1, GPC3, PRICKLE1
	GO:0016477	cell migration	30	3.26835	CTHRC1, CD248, RPS6KB1, ASAP3, CDH2, ARPC5, CD151, PTEN, NDE1, CTGF, HOXA5, FAT1, ITGAV, THBS1, FSCN1, RHBDF1, CD63, PALLD, GAS6, TNS3, BTG1, GOLPH3, ARPC5L, PDGFRB, TGFBR3, JAK2, LAMC1, BAMBI, ENG, LCP1		GO:0002181	cytoplasmic translation	3	1.35148	RPLP0, RPL7L1, RPL15
	GO:0007507	heart development	30	2.83035	MEF2C, PAM, GNA11, EDN1, COL3A1, GJA1, SRF, PTEN, EDNRA, ZFP36L1, APLNR, RB1CC1, TEK, PKD2, HEG1, PTN, LOX, CALCRL, COX17, PCSK5, FBN1, RAF1, PTPN11, NOTCH1, ADAP2, ADM, KCNJ8, ID3, HTR2B, ACVR1		GO:0072661	protein targeting to plasma membrane	3	1.32051	PALM, TESC, TMED2
	GO:0001525	angiogenesis	30	1.63682	CAV1, CYP1B1, JAG1, PTEN, EPHB4, APOD, XBP1, CTGF, FAP, ITGAV, TEK, SOX18, CALCRL, VEZF1, COL8A1, COL8A2, CIB1, SYK, SCG2, PIK3CG, EPAS1, RASIP1, COL15A1, UBP1, LEP, PRKD1, MEOX2, CLIC4, JAM3, PDCD6		GO:2001238	positive regulation of extrinsic apoptotic signaling pathway	3	1.32051	TNFSF10, TNFRSF12A, AGT
	GO:0007596	blood coagulation	28	2.20648	HPS6, F13A1, ENPP4, MMRN1, SERPINE2, VKORC1, SH2B3, PDGFC, PDGFD, ENTPD1, PAPSS2, ANO6, DOCK11, AP3B1, LYN, ANXA5, WAS, VWF, P2RX7, HDAC2, CD36, HDAC1, COL1A2, IRF1, H3F3A, H3F3B, JAK2, PLAU		GO:2000041	negative regulation of planar cell polarity pathway involved in axis elongation	2	1.57098	SFRP1, SFRP2
	GO:0043488	regulation of mRNA stability	27	6.15714	PSMB10, CARHSP1, HSPA1A, ZFP36L1, PSMB4, PSMB7, PSMB6, SET, PSMB1, PSMB2, PUM1, PABPC1, PUM2, PSMD7, RPS27A, EXOSC8, EXOSC6, YTHDF2, PSMA2, PSMC5, PSMA6, PSMA5, SERBP1, PSMA4, PSMA3, UBB, PSME4		GO:1904956	regulation of midbrain dopaminergic neuron differentiation	2	1.57098	SFRP1, SFRP2
	GO:0032496	response to lipopolysaccharide	27	2.60034	TNFRSF21, HMGB2, EDN1, CXCL9, RPS6KB1, DCN, VCAM1, TNFRSF11B, JUND, IRAK1, SELP, PELI1, PTGER4, LY96, TNFRSF14, HNRNPA0, P2RX7, TJP1, NOTCH1, HDAC2, HDAC1, ADM, PPBP, KCNJ8, SLPI, JAK2, CTSG		GO:0002034	regulation of blood vessel size by renin-angiotensin	2	1.39781	AGTR1, AGT
	GO:0038095	Fc-epsilon receptor signaling pathway	27	2.11959	PSMB10, PPP3R1, NFKB1, BTK, PSMB4, PSMB7, PSMB6, PSMB1, MAP3K1, PSMB2, PSMD7, RPS27A, SYK, PIK3R2, FCER1A, LYN, PSMA2, UBE2N, PRKCQ, PSMC5, PSMA6, PSMA5, PSMA4, PSMA3, PSME4, UBB, CALM1		GO:0030185	nitric oxide transport	2	1.39781	EDN1, AQP1
	GO:0030335	positive regulation of cell migration	27	1.93855	AIF1, EDN1, CCL5, DAB2, XBP1, ITGAV, PDGFC, PDGFD, THBS1, CSF1R, CIB1, STX4, LYN, IGF1, SMAD3, SNAI2, CDH13, NOTCH1, PDGFRA, SDCBP, PDGFRB, ROR2, CPNE3, JAK2, MAPRE1, PLAU, ACVR1		GO:0048014	Tie signaling pathway	2	1.39781	TEK, ANGPT2
	GO:0043161	proteasome-mediated ubiquitin-dependent protein catabolic process	27	1.44925	UBXN1, PSMB10, UCHL1, ANAPC4, PCNP, RNF181, CDC26, RBX1, PSMA2, TRIM38, PSMB4, PSMB7, PSMB6, PSMC5, CRBN, PSMA6, PSMB1, VCP, PSMA5, PSMA4, PSMA3, PSMB2, PSME4, UBB, PSMD7, RPS27A, RNF145		GO:1901857	positive regulation of cellular respiration	2	1.39781	MYC, PPARGC1A
	GO:0070374	positive regulation of ERK1 and ERK2 cascade	26	1.94129	CCL8, CCL5, PTEN, MIF, SPRY2, CTGF, CCL21, TEK, PDGFC, PDGFD, CSF1R, CIB1, NOX4, MAP2K2, PHB, CCL19, GAS6, PTPN11, CCL13, CD36, PDGFRA, PLA2G2A, PDGFRB, HTR2B, TREM2, HTR2A		cyan
	GO:0006457	protein folding	26	1.79684	HSP90AB1, TMX1, FKBP5, VBP1, CCT2, CANX, CDC37, DNAJA1, DNAJA4, DNAJA3, HSPA9, DNAJA2, NKTR, CCT7, ST13, PFDN1, HSP90B1, TBCA, TXNDC5, MLEC, PFDN5, PPIC, CCT8, TXN, FKBP11, DNAJB6		GO:0043547	positive regulation of GTPase activity	24	1.49325	DENND5A, ARHGEF6, ARHGEF18, RAB3IL1, ARHGAP18, DOCK6, RIC8A, THY1, PREB, PLEKHG2, PTGIR, SEC61B, GBF1, SBF1, SGSM2, STARD8, DENND4C, CALM3, TRAPPC4, DOCK10, TRAPPC1, ARHGDIA, ARHGDIB, SPTAN1
	GO:0002576	platelet degranulation	25	5.08099	A2M, RARRES2, F13A1, TGFB3, MMRN1, TIMP3, CD9, APP, LGALS3BP, SERPINA3, THBS1, CFD, SELP, LYN, PLEK, IGF1, CD63, SOD1, GAS6, VWF, LAMP2, CD36, PPBP, CLEC3B, CALM1		GO:0006915	apoptotic process	24	1.48656	LTBR, ARHGEF6, ADAMTSL4, S100A9, TLR2, CST3, PRDX5, TMEM219, PPP1R13L, RRAGC, RNF130, PRELID1, TMEM173, NISCH, MYD88, PDE1B, COMP, SULF1, MAP3K8, MFSD10, IRF3, PAK1, DDX41, PUF60
	GO:0002223	stimulatory C-type lectin receptor signaling pathway	25	4.92939	PSMB10, NFKB1, PSMB4, PSMB7, PSMB6, PSMB1, PSMB2, CLEC4A, PSMD7, RPS27A, SYK, CARD9, LYN, ICAM2, RAF1, PSMA2, UBE2N, PSMC5, PSMA6, PSMA5, CD209, PSMA4, PSMA3, UBB, PSME4		GO:0030198	extracellular matrix organization	17	4.0924	B4GALT1, COL4A2, PXDN, ADAMTSL4, TNC, OLFML2B, COL3A1, ITGA10, NFKB2, COL5A1, LAMA4, COL7A1, COMP, COL6A3, TGFBI, BCL3, COL6A1
	GO:0033209	tumor necrosis factor-mediated signaling pathway	25	4.05284	PSMB10, TNFRSF21, TNFRSF14, PLVAP, STAT1, PSMA2, PSMB4, PSMB7, TNFRSF11B, PSMB6, PSMC5, TNFSF13B, PSMA6, PSMB1, TXNDC17, PSMA5, PSMA4, PSMA3, PSMB2, JAK2, PSME4, UBB, COMMD7, PSMD7, RPS27A		GO:0006810	transport	16	1.31097	SLC20A1, TRPV2, NUP93, TMED9, DBI, PITPNM1, SLC35B1, TMED3, SLC6A8, TRAPPC4, MFSD10, SLC25A37, TMEM184B, SLC25A39, TRAPPC1, AP2M1
	GO:0090263	positive regulation of canonical Wnt signaling pathway	25	3.93289	PSMB10, CAV1, NFKB1, PSMA2, PSMB4, PSMB7, PSMC5, PSMB6, PSMA6, PSMB1, SFRP1, PSMA5, SFRP2, RSPO3, PSMA4, SFRP4, PSMA3, PSMB2, ROR2, VPS35, PSME4, UBB, BAMBI, PSMD7, RPS27A		GO:0006886	intracellular protein transport	14	1.93938	KDELR2, STX4, VPS18, TBC1D2B, SNX8, SNX17, TBC1D16, SEC61B, SGSM2, SCG5, STX10, GGA2, HDAC6, AP2M1
	GO:0043123	positive regulation of I-kappaB kinase/NF-kappaB signaling	25	2.10506	S100A4, MTDH, SLC44A2, SLC20A1, GJA1, CXXC5, TMED4, TMEM9B, MYD88, CCL21, RPS27A, IRAK1, CFLAR, PELI1, CARD9, LGALS1, CCL19, TRIM22, PRKD1, UBE2N, TRIM38, TNFSF10, CD36, UBB, HTR2B		GO:0001666	response to hypoxia	13	2.61997	MUC1, LDHA, CST3, TLR2, MMP14, MMP2, AGTRAP, SCAP, LONP1, ADSL, PAK1, TM9SF4, ENG
	GO:0002479	antigen processing and presentation of exogenous peptide antigen via MHC class I, TAP-dependent	24	8.82875	PSMB10, NCF1, HLA-A, HLA-B, HLA-F, B2M, PSMA2, CYBA, PSMB4, CYBB, PSMB7, PSMC5, CD36, PSMB6, PSMA6, PSMB1, PSMA5, ITGAV, PSMA4, FCGR1A, PSMA3, PSMB2, PSME4, PSMD7		GO:0005975	carbohydrate metabolic process	13	2.57846	MGAT1, PHKA2, B4GALT1, AMDHD2, LDHA, B3GAT3, SLC2A5, GNPDA1, IDH2, AKR7A2, CHI3L2, PIGQ, IDUA
	GO:0060071	Wnt signaling pathway, planar cell polarity pathway	24	5.44399	PSMB10, CTHRC1, AP2S1, FZD4, PSMA2, GPC4, PSMB4, PSMB7, PSMC5, PSMB6, PSMA6, PSMB1, PRICKLE1, PSMA5, PSMA4, PSMA3, PSMB2, PRICKLE2, ROR2, UBB, PSME4, PSMD7, RPS27A, AP2M1		GO:0006888	ER to Golgi vesicle-mediated transport	12	2.39707	PREB, CTSZ, GBF1, COL7A1, TMED3, ATL3, TRAPPC2L, TRAPPC4, TMED9, TRAPPC1, YIF1A, SPTAN1
	GO:0051092	positive regulation of NF-kappaB transcription factor activity	24	2.86413	IRAK1, CFLAR, DDRGK1, MTDH, S100A9, PRKCH, NFKB1, HSPA1A, GREM1, TRIM22, BTK, UBE2N, PRKD1, TRIM38, PRKCQ, MYD88, PSMA6, MTPN, CAT, LRRFIP1, UBB, EIF2AK2, RPS27A, CIB1		GO:0043123	positive regulation of I-kappaB kinase/NF-kappaB signaling	10	1.52309	IRAK1, LTBR, TMEM9B, MYD88, SLC20A1, SLC35B2, SHISA5, IRF3, TMEM101, RNF31
	GO:0016192	vesicle-mediated transport	24	2.11702	GDI2, STX4, AP2S1, SPIRE1, OPTN, SFT2D1, COPB2, FNBP1, AP1S2, RAB11FIP3, AP3M2, RABEP1, COPB1, VAMP7, NCK1, VAMP5, VAMP3, CPNE3, VAMP2, ARAP3, RAB10, CLINT1, AP2M1, AP3B1		GO:0007568	aging	10	1.46457	GSS, IRAK1, TYMS, LONP1, LRP1, COL3A1, KRT14, RPN2, NFKB2, SCAP
	GO:0060333	interferon-gamma-mediated signaling pathway	22	6.31573	HLA-DRB3, HLA-A, HLA-B, STAT1, TRIM22, B2M, HLA-F, VCAM1, IRF9, TRIM38, TRIM68, FCGR1A, MT2A, IRF1, HLA-DRB4, HLA-DRB5, HLA-DPA1, JAK2, HLA-DPB1, IFNGR1, GBP1, HLA-DRA		GO:0030574	collagen catabolic process	9	3.52082	COL4A2, CTSK, COL7A1, COL3A1, COL6A3, COL6A1, MMP14, MMP2, COL5A1
	GO:0009615	response to virus	22	3.233	MEF2C, ODC1, IFIH1, IFITM1, IFITM2, DDX1, RPS15A, CCL19, CCL8, IFI44, CCL5, TRIM22, CXCL12, PSMA2, CCDC130, NPC2, MYD88, CFL1, EEF1G, DDX21, EIF2AK2, IFNGR1		GO:0032481	positive regulation of type I interferon production	8	3.39675	POLR2H, IRAK1, TMEM173, MYD88, IRF3, NFKB2, LRRFIP1, DDX41
	GO:0006897	endocytosis	22	1.97236	PIK3CG, SNX2, NOSTRIN, SNX4, DPYSL2, FNBP1, NPC1, APP, GAPVD1, RABEP1, VAMP7, CD209, RAB22A, NECAP2, RIN2, SORT1, NECAP1, BIN1, CLINT1, SCARA5, SNX10, GHR		GO:0006890	retrograde vesicle-mediated transport, Golgi to ER	8	2.18858	KDELR2, GBF1, NBAS, TMED3, PICK1, SURF4, ARF5, TMED9
	GO:0030308	negative regulation of cell growth	21	2.33348	DCBLD2, PHB, BMPR2, SMAD4, NDUFA13, SMAD3, GJA1, PPT1, FRZB, RBBP7, GREM1, SLIT2, CDKN1B, SERPINE2, SFRP1, BTG1, SFRP2, CDA, EAF2, SERTAD2, SMARCA4		GO:0071230	cellular response to amino acid stimulus	7	2.81421	CEBPB, COL3A1, DNMT1, COL6A1, RRAGD, MMP2, RRAGC
	GO:0050900	leukocyte migration	21	2.2924	SELP, C3AR1, ATP1B1, CAV1, LYN, MMP9, FPR1, FPR3, ITGAM, GAS6, PTPN11, MIF, CD47, ITGAV, TEK, COL1A2, MSN, JAM2, YES1, JAM3, PIK3R2		GO:0048208	COPII vesicle coating	7	2.23711	PREB, CTSZ, COL7A1, SEC16A, TRAPPC2L, TRAPPC4, TRAPPC1
	GO:0032981	mitochondrial respiratory chain complex I assembly	20	5.91699	NDUFB3, NDUFB5, NDUFA3, NDUFB10, NDUFB6, NDUFA8, NDUFB7, NDUFA9, NDUFB8, NDUFAB1, NDUFA13, TMEM126B, NDUFA1, NDUFAF2, NDUFA12, NDUFB2, NDUFA11, NUBPL, NDUFS5, NDUFV2		GO:0030334	regulation of cell migration	7	1.83957	LAMA4, PLXNA3, PLXNA1, PLXNB2, PTPN23, DOCK10, THY1
	GO:0030168	platelet activation	20	2.24211	GNA13, PIK3CG, LYN, GNA11, COL3A1, AXL, PRKCH, RAF1, ITPR3, SRF, ITPR1, GAS6, PTPN11, CD9, PRKCQ, VWF, SAA1, COL1A2, RHOG, SYK		GO:0035987	endodermal cell differentiation	6	3.16951	COL4A2, COL7A1, COL6A1, MMP14, HSBP1, MMP2
	GO:0006914	autophagy	20	1.59978	GABARAPL2, TMBIM6, CHMP4A, S100A9, VPS37C, OPTN, UBQLN2, PARK7, CHMP2B, LAMP1, NPC1, SRPX, VCP, MAP1LC3B, TMEM59, XBP1, RB1CC1, CTSD, DRAM1, VPS36		GO:0006094	gluconeogenesis	6	2.20278	CRTC2, TPI1, GOT1, ENO2, GAPDH, ENO1
	GO:0007204	positive regulation of cytosolic calcium ion concentration	20	1.56955	GNA13, PIK3CG, C3AR1, PTGER4, SWAP70, EDN1, FPR1, GJA1, FPR3, ITPR3, BCAP31, EDNRA, S1PR3, FIS1, CD55, CD36, ADM, SAA1, PDGFRA, JAK2		GO:0051603	proteolysis involved in cellular protein catabolic process	6	2.04288	SCPEP1, CTSK, CTSZ, LONP1, PSMB3, CTSF
	GO:0050821	protein stabilization	20	1.51061	HSP90AB1, ATP1B1, GTPBP4, FLOT2, PHB, SMAD3, IGF1, HCFC1, CCT2, HSPA1A, PTEN, CDC37, PARK7, ZNF207, CCT7, LAMP1, LAMP2, CCT8, GAPDH, DNAJA3		GO:0051592	response to calcium ion	6	1.70949	TXNIP, PEF1, D2HGDH, CCND1, CALM3, ENTPD6
	GO:0008360	regulation of cell shape	20	1.39854	GNA13, ARHGEF18, HEXB, CDC42SE1, RHOQ, ARHGAP15, TPM1, PHIP, EPB41L3, CCL13, MKLN1, EPS8, PTN, MSN, FGD5, ARAP3, CDC42EP4, BAMBI, CSF1R, MYH10		GO:0032981	mitochondrial respiratory chain complex I assembly	6	1.57043	NDUFS7, NDUFA9, NDUFV1, NDUFA13, FOXRED1, NDUFS3
	GO:0070125	mitochondrial translational elongation	19	3.41164	TUFM, MRPS35, MRPS17, MRPL51, MRPS33, MRPL50, MRPS24, MRPS6, MRPL20, MRPL24, MRPL13, MRPL15, MRPS9, MRPL17, MRPL54, MRPL18, MRPL33, MRPL34, DAP3		GO:0007030	Golgi organization	6	1.31245	NPLOC4, GBF1, PLEKHM2, ATL3, SURF4, TMED9
	GO:0030336	negative regulation of cell migration	19	2.81497	RECK, RAP2A, GTPBP4, CYP1B1, PODN, IFITM1, DPYSL3, TPM1, PTEN, SRF, SLIT2, SFRP1, SFRP2, CLIC4, SULF1, PTN, ARAP3, ENG, TP53INP1		GO:0018345	protein palmitoylation	5	2.75266	ZDHHC14, ZDHHC8, ZDHHC12, ZDHHC7, DBI
	GO:0060326	cell chemotaxis	18	4.45529	C3AR1, HMGB2, FPR1, CXCL9, CCL19, CCL8, FPR3, CCL5, CXCL12, VCAM1, PRKCQ, CCL13, CXCL14, CCL21, PDGFRA, PDGFRB, ENG, RHOG		GO:0043928	exonucleolytic nuclear-transcribed mRNA catabolic process involved in deadenylation-dependent decay	5	2.1449	EXOSC6, DCP2, EXOSC7, LSM4, LSM3
	GO:0051437	positive regulation of ubiquitin-protein ligase activity involved in regulation of mitotic cell cycle transition	18	3.54984	PSMB10, ANAPC4, CDC26, PSMA2, PSMB4, PSMB7, PSMC5, PSMB6, PSMA6, PSMB1, PSMA5, PSMA4, PSMA3, PSMB2, UBB, PSME4, PSMD7, RPS27A		GO:0002755	MyD88-dependent toll-like receptor signaling pathway	5	1.94513	IRAK1, IRAK3, MYD88, TLR2, TNIP1
	GO:0031145	anaphase-promoting complex-dependent catabolic process	18	3.33976	PSMB10, ANAPC4, CDC26, PSMA2, PSMB4, PSMB7, PSMC5, PSMB6, PSMA6, PSMB1, PSMA5, PSMA4, PSMA3, PSMB2, UBB, PSME4, PSMD7, RPS27A		GO:0009060	aerobic respiration	5	1.94513	UQCRC1, NDUFV1, BLOC1S1, ADSL, CHCHD5
	GO:0070126	mitochondrial translational termination	18	2.89918	MRPS35, MRPS17, MRPL51, MRPS33, MRPL50, MRPS24, MRPS6, MRPL20, MRPL24, MRPL13, MRPL15, MRPS9, MRPL17, MRPL54, MRPL18, MRPL33, MRPL34, DAP3		GO:0006096	glycolytic process	5	1.89987	LDHA, TPI1, ENO2, GAPDH, ENO1
	GO:0048013	ephrin receptor signaling pathway	18	2.89918	ANKS1A, LYN, AP2S1, MMP9, EFNB2, ARPC5, EPHB4, PTPN11, NCSTN, ARPC1A, ACTR3, ARPC1B, ACTR2, ARPC3, NCK1, SDCBP, YES1, AP2M1		GO:0007162	negative regulation of cell adhesion	5	1.77357	PLXNB2, TNC, TGFBI, ARHGDIA, ARHGDIB
	GO:0032355	response to estradiol	18	2.62153	PAM, STRN3, CST3, EEF2, MBD4, POSTN, PTEN, LEP, CCND1, CDKN1B, ETS1, CTGF, PTN, PDGFRB, CAT, NR2F2, GSTP1, GHR		GO:0006120	mitochondrial electron transport, NADH to ubiquinone	5	1.37541	NDUFS7, NDUFA9, NDUFV1, NDUFA13, NDUFS3
	GO:0045766	positive regulation of angiogenesis	18	1.61119	SASH1, C3AR1, CYP1B1, MTDH, C3, GREM1, PRKD1, CYBB, PTGIS, ADM, BTG1, SFRP2, ETS1, XBP1, TEK, THBS1, PDCD6, ENG		GO:0021762	substantia nigra development	5	1.37541	LDHA, SEC16A, CALM3, BASP1, NDUFS3
	GO:0044267	cellular protein metabolic process	18	1.51441	D2HGDH, SNCAIP, CKAP4, HEXB, IGFBP6, CST3, LYZ, IGF1, CCDC59, B2M, APP, SAA1, H3F3A, HIST1H4C, H3F3B, UBB, CTSG, RPS27A		GO:0034498	early endosome to Golgi transport	4	2.45176	SNX8, SURF4, TMED9, STX10
	GO:0051603	proteolysis involved in cellular protein catabolic process	17	5.71891	PSMB10, SCPEP1, CTSZ, CTSS, CPVL, PSMA2, PSMB4, CTSK, PSMB7, PSMB6, PSMA6, PSMB1, PSMA4, FAP, PSMA3, PSMB2, CTSB		GO:0010952	positive regulation of peptidase activity	4	2.34649	NDUFA13, PSME4, MMP14, PCOLCE
	GO:0006120	mitochondrial electron transport, NADH to ubiquinone	17	5.58423	NDUFB3, NDUFB5, NDUFA3, NDUFB6, NDUFB10, NDUFA8, NDUFB7, NDUFA9, NDUFB8, NDUFAB1, NDUFA13, NDUFA1, NDUFA12, NDUFB2, NDUFA11, NDUFS5, NDUFV2		GO:0006103	2-oxoglutarate metabolic process	4	1.93435	D2HGDH, GOT1, STAT5A, IDH2
	GO:0038061	NIK/NF-kappaB signaling	17	3.80349	PSMB10, NFKB1, PSMA2, PSMB4, PSMB7, PSMC5, PSMB6, PSMA6, PSMB1, PSMA5, PSMA4, PSMA3, PSMB2, UBB, PSME4, PSMD7, RPS27A		GO:0006401	RNA catabolic process	4	1.74795	EXOSC7, SND1, SKIV2L, PABPC4
	GO:0051436	negative regulation of ubiquitin-protein ligase activity involved in mitotic cell cycle	17	3.4137	PSMB10, ANAPC4, CDC26, PSMA2, PSMB4, PSMB7, PSMC5, PSMB6, PSMA6, PSMB1, PSMA5, PSMA4, PSMA3, PSMB2, UBB, PSMD7, RPS27A		GO:0061621	canonical glycolysis	4	1.49951	TPI1, ENO2, GAPDH, ENO1
	GO:0031295	T cell costimulation	17	2.93955	CAV1, LYN, LGALS1, HLA-DRB3, EFNB2, CCL19, TNFRSF14, PTPN11, TNFSF13B, CCL21, MAP3K8, HLA-DRB4, HLA-DRB5, HLA-DPA1, HLA-DPB1, YES1, HLA-DRA		GO:0042771	intrinsic apoptotic signaling pathway in response to DNA damage by p53 class mediator	4	1.30411	NUPR1, HIPK2, SHISA5, BCL3
	GO:0006928	movement of cell or subcellular component	17	2.48111	GNA13, ENPP2, IGF1, FPR3, ARPC5, CERCAM, TPM1, ACTR3, CD9, ACTR2, ARPC1B, LYVE1, ARPC3, SPINT2, TXN, JAK2, MSN		GO:0043045	DNA methylation involved in embryo development	3	2.16617	TRIM28, PICK1, DNMT1
	GO:0001649	osteoblast differentiation	17	1.69274	IBSP, MEF2C, GTPBP4, ERH, PHB, SYNCRIP, GJA1, SNAI2, RBMX, FBL, SFRP1, H3F3A, DDX21, VCAN, H3F3B, CAT, HNRNPC		GO:0032527	protein exit from endoplasmic reticulum	3	1.99784	PREB, SURF4, TMED9
	GO:0071356	cellular response to tumor necrosis factor	17	1.48759	CEBPA, PID1, TNFRSF21, EDN1, CCL19, CCL8, POSTN, CCL5, VCAM1, ZFP36L1, CYBA, CCL13, SFRP1, HDAC1, CCL21, THBS1, CIB1		GO:0010950	positive regulation of endopeptidase activity	3	1.6408	PRELID1, PSME2, AKIRIN2
	GO:0048661	positive regulation of smooth muscle cell proliferation	16	3.76131	RBPMS2, IRAK1, AIF1, EDN1, IGF1, RPS6KB1, CCL5, STAT1, CYBA, CDH13, MYD88, AKR1B1, PDGFRB, CALCRL, PDGFD, THBS1		GO:0035999	tetrahydrofolate interconversion	3	1.55158	MTHFS, TYMS, SHMT2
	GO:0098869	cellular oxidant detoxification	16	2.99385	PXDN, S100A9, PRDX4, GSTT1, SESN1, PARK7, MGST3, TXNDC17, GPX4, GSTK1, GPX3, TXN, TXNRD1, CAT, GSTP1, TP53INP1		GO:0046653	tetrahydrofolate metabolic process	3	1.55158	MTHFS, TYMS, SHMT2
	GO:0032869	cellular response to insulin stimulus	16	2.55873	RAB8A, RHOQ, STAT1, LPIN1, USF1, ZFP36L1, YWHAG, RAB31, XBP1, EEF2K, VAMP2, RAB10, PARP1, GSTP1, GHR, PIK3R2		GO:1902287	semaphorin-plexin signaling pathway involved in axon guidance	3	1.40057	PLXNA3, PLXNA1, PLXNB2
	GO:0046718	viral entry into host cell	16	2.39295	EFNB2, AXL, TNFRSF14, HSPA1A, DYNLT1, GAS6, LAMP1, NPC1, CD55, TFRC, ITGAV, CD209, CLDN1, SCARB2, CTSB, HTR2A		GO:0043206	extracellular fibril organization	3	1.40057	COL3A1, CST3, COL5A1
	GO:0051897	positive regulation of protein kinase B signaling	16	2.18872	PIK3CG, NOX4, MTDH, HCLS1, AXL, CCL19, PARK7, GAS6, LEP, SPRY2, C1QBP, CCL21, XBP1, TXN, TEK, THBS1		GO:0032026	response to magnesium ion	3	1.33566	D2HGDH, CCND1, ENTPD6
	GO:0050830	defense response to Gram-positive bacterium	16	2.14045	HMGB2, CARD9, GSDMD, HLA-A, LYZ, TNFRSF14, RPL39, B2M, P2RX7, APP, MYD88, CD36, ADM, HIST1H2BK, HIST1H2BJ, PLA2G2A		darkgreen
	GO:0019886	antigen processing and presentation of exogenous peptide antigen via MHC class II	16	1.83062	AP2S1, HLA-DRB3, CTSS, HLA-DMB, HLA-DMA, CANX, DCTN4, AP1S2, HLA-DRB4, HLA-DRB5, CTSD, HLA-DPA1, HLA-DPB1, HLA-DOA, HLA-DRA, AP2M1		GO:0006955	immune response	23	14.3715	HLA-DQB1, TCF7, CXCL5, VPREB3, CXCL2, CCL4, TNFRSF4, OSM, CCL22, CCR7, PPBP, LAX1, CCL21, CXCL13, S1PR4, CD22, CD79B, DEFA1, IL2RG, HLA-DOB, LTB, CD27, LCP2
	GO:0045471	response to ethanol	16	1.36504	TUFM, RPL15, MGMT, RPS6KB1, EEF2, SOD1, CDO1, PTEN, LEP, VCAM1, TJP1, CCND1, CAT, RPL10A, CD14, GSTP1		GO:0007165	signal transduction	16	2.4505	CXCL5, SPOCK2, CRABP2, CDC42SE1, TNFRSF17, ARHGAP15, CCL4, ARHGAP25, LEP, LSP1, CD38, CCL22, IL2RG, CD79B, LTB, HLA-DOB
	GO:0006521	regulation of cellular amino acid metabolic process	15	4.01863	PSMB10, ODC1, PSMA2, PSMB4, PSMB7, PSMC5, PSMB6, PSMB1, PSMA6, PSMA5, PSMA4, PSMA3, PSMB2, PSME4, PSMD7		GO:0006954	inflammatory response	13	5.5877	NFKBIZ, CXCL5, CXCL2, CHI3L1, TNFRSF4, CCL4, MMP25, CCL22, CCR7, PPBP, CCL21, CXCL13, CD27
	GO:0019882	antigen processing and presentation	15	3.63713	RAB8B, HLA-DRB3, HLA-A, FCGRT, CTSS, HLA-B, HLA-DMB, RAB32, CD209, HLA-DRB4, HLA-DRB5, HLA-DPA1, HLA-DPB1, RAB10, HLA-DRA		GO:0007186	G-protein coupled receptor signaling pathway	13	2.14975	CXCL5, CD3E, CXCL2, RGS18, CCL4, CCR7, CCL22, PPBP, CCL21, CXCL13, S1PR4, FCN1, AREG
	GO:0014068	positive regulation of phosphatidylinositol 3-kinase signaling	15	2.8538	SELP, HCLS1, IGF1, DCN, CCL5, HCST, LEP, TEK, PDGFRA, PDGFRB, JAK2, PDGFC, PIK3AP1, CAT, PDGFD		GO:0042127	regulation of cell proliferation	9	4.83472	TCF7, PPBP, CXCL13, BLK, CXCL2, LCK, NFKBIA, TNFRSF4, CD27
	GO:0097190	apoptotic signaling pathway	15	2.47429	TNFRSF21, CAV1, LY96, NDUFA13, TNFRSF14, DAPK1, BTK, P2RX7, TNFRSF11B, MOAP1, PTGIS, MLLT11, PDCD6, CD14, DAP3		GO:0043066	negative regulation of apoptotic process	9	2.23758	LEP, PPIF, CD38, BLK, LTF, NFKBIA, PIM2, CD27, PLAC8
	GO:0050731	positive regulation of peptidyl-tyrosine phosphorylation	15	1.90853	FCER1A, ENPP2, HCLS1, IGF1, TNFRSF14, MIF, CD36, JAK2, YES1, TREM2, GHR, THBS4, EHD4, HTR2A, SYK		GO:0008284	positive regulation of cell proliferation	9	2.17702	OSM, LEP, BLOC1S2, CXCL5, ITGB1BP1, PDGFD, AREG, SERTAD1, PLAC8
	GO:0007179	transforming growth factor beta receptor signaling pathway	15	1.50627	ARHGEF18, COL3A1, SMAD4, TGFB3, SMAD3, NEDD8, CDH5, COL1A2, TGFBR3, UBB, PARP1, BAMBI, ENG, RPS27A, ACVR1		GO:0032496	response to lipopolysaccharide	8	4.25392	CCR7, PPBP, CXCL5, CXCL13, CXCL2, TNFRSF4, CD27, TRIB1
	GO:0060548	negative regulation of cell death	14	3.08456	MGMT, SMAD4, CST3, BNIP3, TEAD2, HSPA1A, PARK7, PRKD1, TMEM109, NPC1, CTGF, NCK1, BNIP3L, HTR2B		GO:0070098	chemokine-mediated signaling pathway	7	5.3962	CCL22, PPBP, CXCL5, CXCL13, CCL21, CXCL2, CCL4
	GO:0045669	positive regulation of osteoblast differentiation	14	2.71327	MEF2C, CEBPA, PRKD1, CTHRC1, IFITM1, SFRP2, JUND, BMPR2, IGF1, GJA1, JAG1, CLIC1, DDR2, ACVR1		GO:0050776	regulation of immune response	7	3.16611	KLRB1, CD19, CD3E, SELL, ICAM3, SLAMF7, CD300LB
	GO:0030574	collagen catabolic process	14	2.45169	MMP9, COL3A1, COL15A1, CTSS, COL5A2, MMP12, CTSK, COL6A3, COL1A2, CTSD, CTSB, COL8A1, COL8A2, COL10A1		GO:0007267	cell-cell signaling	7	2.38525	CCL22, CXCL5, CXCL13, CCL21, AREG, CCL4, LTB
	GO:0022617	extracellular matrix disassembly	14	1.81452	A2M, CAPNS1, MMP9, FBN1, CTSS, DCN, MMP12, CTSK, HTRA1, LAMC1, TPSAB1, ENG, LCP1, CTSG		GO:0050853	B cell receptor signaling pathway	6	4.7697	CD38, CD19, BLK, LCK, CD79B, CD79A
	GO:0070301	cellular response to hydrogen peroxide	13	2.43619	CYP1B1, CST3, AXL, BNIP3, PARK7, RPS3, HDAC2, ETS1, AKR1B1, PDGFD, TNFAIP3, NET1, PLEKHA1		GO:0006935	chemotaxis	6	3.0917	LSP1, CCL22, CCR7, CXCL5, CXCL2, DEFA1
	GO:0070373	negative regulation of ERK1 and ERK2 cascade	13	2.37117	SPRY2, EIF3A, DUSP3, LYN, XBP1, PHB, SMAD4, SYNJ2BP, PTPN1, PTEN, TIMP3, GSTP1, GBP1		GO:0002250	adaptive immune response	6	2.71852	LAX1, TNFRSF17, CD79B, SLAMF7, CD79A, CLEC4M
	GO:0042102	positive regulation of T cell proliferation	13	2.24671	AIF1, CCL19, HLA-DMB, CCL5, VCAM1, LEP, PRKCQ, TNFSF13B, TFRC, NCK1, HLA-DPA1, HLA-DPB1, DNAJA3		GO:0070374	positive regulation of ERK1 and ERK2 cascade	6	2.40461	CCL22, CCR7, CCL21, CHI3L1, PDGFD, CCL4
	GO:0030512	negative regulation of transforming growth factor beta receptor signaling pathway	13	2.01821	CAV1, ADAMTSL2, TGFB3, SMAD3, HSPA1A, RASL11B, HTRA1, XBP1, TGFBR3, UBB, BAMBI, ENG, RPS27A		GO:0007166	cell surface receptor signaling pathway	6	1.62058	KLRB1, CD19, CD3E, CXCL13, CDA, CD27
	GO:0006952	defense response	13	1.86286	CAMLG, RNASE6, CST3, CXCL9, IL32, HLA-B, WAS, CXCL12, MLF2, TAP1, HCP5, TFF3, TPSAB1		GO:0051897	positive regulation of protein kinase B signaling	5	2.79955	LEP, CCR7, CCL21, ITGB1BP1, CHI3L1
	GO:0009749	response to glucose	13	1.81385	EGR1, LPL, LDHA, CDKN1B, CTGF, SLC37A4, GJA1, RPS6KB1, VAMP2, THBS1, PTEN, EIF2B1, GPAM		GO:0050852	T cell receptor signaling pathway	5	1.92713	HLA-DQB1, CD3E, LCK, NFKBIA, LCP2
	GO:0033138	positive regulation of peptidyl-serine phosphorylation	13	1.71973	PRKD1, SPRY2, CAV1, SFRP2, HCLS1, TXN, SMYD3, RAF1, MAD2L2, PPP1R15A, PARK7, GAS6, MIF		GO:0051781	positive regulation of cell division	4	2.56099	OSM, PPBP, ITGB1BP1, PDGFD
	GO:0007584	response to nutrient	13	1.54591	LDHA, AHCY, SLC37A4, RPS6KB1, STAT1, PTEN, VCAM1, TNFRSF11B, CYBB, SSTR2, ACSL1, SFRP2, DAD1		GO:0071347	cellular response to interleukin-1	4	2.05848	CCL22, CCL21, CHI3L1, CCL4
	GO:2001237	negative regulation of extrinsic apoptotic signaling pathway	12	3.49494	PHIP, CFLAR, LGALS3, ITGAV, RB1CC1, IGF1, RPS6KB1, THBS1, PARK7, GSTP1, ACVR1, SCG2		GO:0031295	T cell costimulation	4	1.94725	HLA-DQB1, CD3E, CCL21, LCK
	GO:0032760	positive regulation of tumor necrosis factor production	12	2.65545	LEP, CYBA, ZBTB20, CARD9, CD36, HDAC2, MYD88, HDAC1, LY96, CCL19, JAK2, CD14		GO:0043410	positive regulation of MAPK cascade	4	1.903	OSM, LEP, TNFRSF4, CD27
	GO:0031100	organ regeneration	12	2.65545	NOTCH1, ADM, ATIC, AXL, TGFBR3, CDK4, LPIN1, CXCL12, GAS6, GSTP1, LCP1, PRPS1		GO:0007169	transmembrane receptor protein tyrosine kinase signaling pathway	4	1.70675	CD3E, BLK, LCK, LCP2
	GO:0009408	response to heat	12	2.57793	IGFBP7, DNAJA1, IGF1, RPS6KB1, SOD1, CXCL12, DNAJA4, EIF2B1, CD14, DNAJA3, DNAJA2, TP53INP1		GO:0071356	cellular response to tumor necrosis factor	4	1.55335	CCL22, CCL21, CHI3L1, CCL4
	GO:0071560	cellular response to transforming growth factor beta stimulus	12	2.50301	ZFP36L1, NOX4, MEF2C, CAV1, HDAC2, SFRP1, CLEC3B, EDN1, FBN1, POSTN, PDGFD, YES1		GO:0009615	response to virus	4	1.55335	CCL22, PIM2, CCL4, ISG20
	GO:0048146	positive regulation of fibroblast proliferation	12	2.16332	BMI1, ZMIZ1, PDGFRA, PDGFRB, IGF1, PDGFC, PDGFD, CDK4, DDR2, RNASEH2B, GAS6, MIF		GO:0033209	tumor necrosis factor-mediated signaling pathway	4	1.47571	TNFRSF17, TNFRSF4, LTB, CD27
	GO:0071346	cellular response to interferon-gamma	12	1.98403	CCL13, AIF1, CCL21, EDN1, CCL8, EPRS, CCL19, SYNCRIP, HLA-DPA1, CCL5, GAPDH, DAPK1		GO:0007204	positive regulation of cytosolic calcium ion concentration	4	1.33791	CD38, CCR7, CXCL13, S1PR4
	GO:0043406	positive regulation of MAP kinase activity	12	1.87337	PIK3CG, NOX4, MEF2C, IRAK1, EDN1, PDGFRB, PDGFC, PDGFD, HTR2B, IQGAP1, HTR2A, MIF		GO:2000147	positive regulation of cell motility	3	2.51577	CCR7, SPOCK2, CCL21
	GO:0071407	cellular response to organic cyclic compound	12	1.87337	HSP90AB1, CEBPA, CYBA, TMEM173, CDKN1B, CYP1B1, LGALS1, MGMT, HCFC1, RPS6KB1, CCL5, STAT1		GO:0050850	positive regulation of calcium-mediated signaling	3	2.20615	FCER1A, CD3E, CCL4
	GO:0016525	negative regulation of angiogenesis	12	1.71937	PTPRM, SERPINF1, HOXA5, SULF1, TEK, PTN, SYNJ2BP, DCN, THBS1, STAT1, THBS2, THBS4		GO:0090023	positive regulation of neutrophil chemotaxis	3	2.12465	CCR7, CCL21, CXCL2
	GO:0016197	endosomal transport	12	1.53405	CHMP5, CHMP4A, SNX17, KIAA0196, BLOC1S1, VPS37C, UBB, RAB10, WAS, VPS36, RPS27A, CHMP2B		GO:0051209	release of sequestered calcium ion into cytosol	3	1.6062	CCR7, CCL21, LCK
	GO:0006006	glucose metabolic process	12	1.49096	LEP, GNPDA1, APOD, ADPGK, PGM1, PDK4, SLC37A4, FBN1, USF1, GAPDH, PDHB, SERP1		GO:0002548	monocyte chemotaxis	3	1.58667	CCL22, CCL21, CCL4
	GO:0032868	response to insulin	12	1.49096	LEP, EGR1, TNFSF10, EGR2, ADM, UPRT, LYN, SORT1, RPS6KB1, CAT, HADH, EPM2AIP1		GO:0045860	positive regulation of protein kinase activity	3	1.49616	CCR7, CCL21, LCP2
	GO:0048008	platelet-derived growth factor receptor signaling pathway	11	3.92414	ZFAND5, ARID5B, PDGFRA, PDGFRB, PDGFC, JAK2, PDGFD, PTEN, IQGAP1, PLEKHA1, PTPN11		GO:0006909	phagocytosis	3	1.47933	LEP, ICAM3, CDC42SE1
	GO:0001937	negative regulation of endothelial cell proliferation	11	3.92414	CAV1, PTPRM, SULF1, GJA1, ATP5A1, SYNJ2BP, THBS1, STAT1, NR2F2, ENG, SCG2		GO:0071346	cellular response to interferon-gamma	3	1.3435	CCL22, CCL21, CCL4
	GO:0072593	reactive oxygen species metabolic process	11	3.1754	NOX4, P2RX7, CTGF, AOX1, PDK4, PRDX4, NDUFA13, BNIP3, SOD1, SESN1, NDUFAF2		GO:0042102	positive regulation of T cell proliferation	3	1.30351	LEP, CCDC88B, CD3E
	GO:0030199	collagen fibril organization	11	2.77752	FMOD, COL14A1, CYP1B1, SFRP2, LUM, COL3A1, COL1A2, LOX, GREM1, DDR2, COL5A2		GO:0072606	interleukin-8 secretion	2	1.62689	LEP, CHI3L1
	GO:0007266	Rho protein signal transduction	11	1.95536	GNA13, CTNNAL1, CDH13, CFL1, ARHGAP1, COL1A2, MYO9B, SYNJ2BP, TAX1BP3, CDC42EP4, RHOG		GO:0002381	immunoglobulin production involved in immunoglobulin mediated immune response	2	1.53125	GAPT, HLA-DQB1
	GO:0016049	cell growth	11	1.62404	ATP6V0E1, ATP6V0E2, XBP1, ITGAV, MTPN, EDN1, TGFB3, TGFBR3, NOP58, DDX5, EMP3		GO:2000107	negative regulation of leukocyte apoptotic process	2	1.45335	CCR7, CCL21
	GO:0009612	response to mechanical stimulus	11	1.48109	P2RX7, PTGER4, ETS1, COL3A1, JUND, POSTN, RPS6KB1, DCN, THBS1, STAT1, CXCL12		GO:0001768	establishment of T cell polarity	2	1.45335	CCR7, CCL21
	GO:0036498	IRE1-mediated unfolded protein response	11	1.48109	SEC61B, XBP1, HDGF, CTDSP2, PTPN1, SRPRB, YIF1A, EDEM1, SEC61G, SSR1, SERP1		GO:0002606	positive regulation of dendritic cell antigen processing and presentation	2	1.38768	CCR7, CCL21
	GO:0001947	heart looping	11	1.39303	MEF2C, NOTCH1, SETDB2, TBX2, PKD2, SMAD3, GJA1, DLL1, SOX18, ENG, SRF		GO:0034695	response to prostaglandin E	2	1.33096	CCR7, CCL21
	GO:0002181	cytoplasmic translation	10	3.74659	EIF4B, RPL35A, RPL7, RPL22, RPL31, RPLP0, RPL9, RPL15, RPLP1, RPL26		GO:0050862	positive regulation of T cell receptor signaling pathway	2	1.33096	CCR7, LCK
	GO:0014065	phosphatidylinositol 3-kinase signaling	10	3.45653	PIK3CG, ZFP36L1, C1QBP, XBP1, EDN1, IGF1, HTR2B, HTR2A, PLEKHA1, PIK3R2		GO:0010888	negative regulation of lipid storage	2	1.33096	LEP, NFKBIA
	GO:0042769	DNA damage response, detection of DNA damage	10	2.46916	MRPS35, RPA2, MRPS9, DNAJA1, UBB, PARP1, RPS27A, RPS3, RBX1, RPA3		GO:0031665	negative regulation of lipopolysaccharide-mediated signaling pathway	2	1.33096	LTF, TRIB1
	GO:0006446	regulation of translational initiation	10	2.46916	EIF4B, EIF3A, EIF3G, EIF4A2, EIF3E, EIF3F, EIF4A1, DDX1, EIF3K, EIF2B1		darkturquoise
	GO:0000302	response to reactive oxygen species	10	2.2212	NOX4, CYBA, CYBB, APOD, GPX3, TXN, TXNRD1, CAT, SOD1, GSTP1		GO:0071294	cellular response to zinc ion	4	5.14339	MT1M, MT1A, MT2A, MT1X
	GO:0031397	negative regulation of protein ubiquitination	10	2.07225	UBXN1, TSPO, CAV1, GTPBP4, DNAJA1, GNL3L, HSPA1A, TNFAIP3, PARK7, RPS3		GO:0045926	negative regulation of growth	4	5.14339	MT1M, MT1A, MT2A, MT1X
	GO:0051496	positive regulation of stress fiber assembly	10	2.00214	PPM1F, NOX4, SFRP1, CTGF, TGFB3, GPR65, SMAD3, S100A10, TPM1, ARHGEF10		GO:0010038	response to metal ion	3	3.75139	MT1A, MT2A, MT1X
	GO:0031623	receptor internalization	10	1.93473	RAMP3, CD9, CAV1, RAB31, CD36, TFRC, ADM, CALCRL, GHR, SYK		GO:0036018	cellular response to erythropoietin	2	2.39302	MT2A, MT1X
	GO:0016241	regulation of macroautophagy	10	1.86987	ATP6V1A, ATP6V0E1, CAPNS1, ATP6V0E2, UCHL1, VPS35, ATP6V1B2, UBQLN2, VPS26A, GAPDH		GO:0071276	cellular response to cadmium ion	2	1.46999	MT1A, MT1X
	GO:0043434	response to peptide hormone	10	1.86987	CD55, CDKN1B, BTG1, CTGF, JUND, TEK, GJA1, STAT1, CXCL12, EIF2B1		lightgreen
	GO:0045600	positive regulation of fat cell differentiation	10	1.68939	ASXL2, ZFP36L1, CEBPA, RARRES2, SFRP1, XBP1, SFRP2, FRZB, SNAI2, HTR2A		no sigificant results
	GO:0021762	substantia nigra development	10	1.57969	LDHA, YWHAH, ZNF148, CCDC14, GLUD1, UCHL1, COX6B1, YWHAQ, BASP1, CALM1		lightyellow
	GO:0032481	positive regulation of type I interferon production	10	1.47758	XRCC5, IRAK1, TMEM173, POLR2F, MYD88, IRF1, NFKB1, LRRFIP1, CD14, SYK		GO:0046628	positive regulation of insulin receptor signaling pathway	2	1.40306	NUCKS1, SERPINA12
	GO:0002504	antigen processing and presentation of peptide or polysaccharide antigen via MHC class II	9	4.36356	HLA-DRB3, HLA-DRB4, HLA-DRB5, HLA-DPA1, HLA-DPB1, HLA-DMB, HLA-DOA, HLA-DMA, HLA-DRA		GO:0071354	cellular response to interleukin-6	2	1.37153	TDGF1, SELPLG
	GO:0002755	MyD88-dependent toll-like receptor signaling pathway	9	2.16212	IRAK1, CD36, MYD88, LY96, MAP3K1, UBB, RPS27A, CD14, BTK		magenta
	GO:0071902	positive regulation of protein serine/threonine kinase activity	9	2.00143	HSP90AB1, SPRY2, ACSL1, MAP2K2, RALB, CAB39, CSF1R, CIB1, CALM1		GO:0007165	signal transduction	18	1.35841	PTGES3, NAMPT, C3, GULP1, MRC2, GEM, CD164, SKAP2, CXCL12, LGALS3BP, HIF1A, IPO7, PECAM1, DLG4, RALB, VOPP1, NDRG2, NET1
	GO:0018279	protein N-linked glycosylation via asparagine	9	1.65758	OSTC, MAGT1, STT3A, VCP, DPM1, DAD1, RPN1, UBE2J1, ALG5		GO:0098609	cell-cell adhesion	13	5.02899	ZC3H15, CHMP5, FSCN1, DOCK9, SLC9A3R2, YWHAE, TJP1, SCYL1, SDCBP, IDH1, NDRG1, DNAJB1, TJP2
	GO:0006418	tRNA aminoacylation for protein translation	9	1.65758	TARS, NARS, RARS2, AIMP2, RARS, GARS, EPRS, IARS2, PPA1		GO:0007155	cell adhesion	10	1.54169	LGALS3BP, CD44, NLGN4Y, PECAM1, COL6A2, EDIL3, THBS1, CD164, ENTPD1, CXCL12
	GO:0048839	inner ear development	9	1.59722	CEBPA, C1QB, CDKN1B, ANP32B, CXCL14, TGFB3, PDGFRB, DLL1, PTPN11		GO:0006955	immune response	9	1.35229	C3, C1R, GEM, ZEB1, THBS1, CD164, TRIM22, CXCL12, FTH1
	GO:0009725	response to hormone	9	1.53929	LYN, HCLS1, SFRP4, H3F3A, H3F3B, UQCRFS1, ACAT1, SRF, SNURF		GO:0001525	angiogenesis	8	2.29779	HIF1A, PECAM1, HSPG2, SOX17, CALCRL, TNFAIP2, NCL, MMRN2
	GO:0007566	embryo implantation	9	1.53929	RECK, PTGIS, IGFBP7, MMP9, CST3, H3F3A, H3F3B, SOD1, PCSK5		GO:0009615	response to virus	6	2.42808	AP1S1, TPT1, BANF1, TRIM22, CXCL12, DCLK1
	GO:0061025	membrane fusion	9	1.43026	STX4, RABEP1, USO1, VAMP3, VAMP2, NAPB, STX11, STX10, GCA		GO:0050821	protein stabilization	6	2.04322	DVL3, GNAQ, MORC3, CRTAP, SOX17, HIP1
	GO:0006635	fatty acid beta-oxidation	9	1.43026	LEP, ACAA2, CPT2, ECHDC2, DECR1, HIBCH, ACAD11, HADH, ACAT1		GO:0048013	ephrin receptor signaling pathway	5	2.06403	ACTB, ACTG1, ARPC1B, SDCBP, ARPC4
	GO:0030968	endoplasmic reticulum unfolded protein response	9	1.37891	DERL2, CCND1, VCP, XBP1, PTPN1, EIF2AK2, EDEM1, PPP1R15A, SERP1		GO:0038096	Fc-gamma receptor signaling pathway involved in phagocytosis	5	1.50329	ACTB, ACTG1, ARPC1B, ARPC4, NCKAP1
	GO:0071363	cellular response to growth factor stimulus	9	1.37891	IBSP, SFRP1, RPS6KB1, CPNE3, CAT, THBS1, GAS6, EHD4, CIB1		GO:0030036	actin cytoskeleton organization	5	1.47143	SSH1, PDLIM7, FSCN1, SDCBP, DAAM2
	GO:0007159	leukocyte cell-cell adhesion	8	2.31487	VCAM1, SELP, CD209, MSN, CCL5, CERCAM, NT5E, SYK		GO:0006986	response to unfolded protein	4	2.15191	STT3B, DNAJB1, THBS1, DNAJB4
	GO:0043001	Golgi to plasma membrane protein transport	8	2.11606	RAB31, GOLPH3, VAMP7, VAMP5, VAMP3, VAMP2, OPTN, RAB10		GO:0030097	hemopoiesis	4	1.74977	ZFP36L2, MKNK2, IFI16, CD164
	GO:0048678	response to axon injury	8	2.11606	MATN2, APOD, LYN, AIF1, LGALS1, CST3, DPYSL3, SOD1		GO:0009612	response to mechanical stimulus	4	1.74977	BTG2, LRP11, THBS1, CXCL12
	GO:0006378	mRNA polyadenylation	8	2.0249	PCF11, PAPOLA, APP, GRSF1, AHCYL1, PABPC1, CPSF3, SSU72		GO:0000902	cell morphogenesis	4	1.69283	SSH1, RP2, KLF2, FRY
	GO:0002474	antigen processing and presentation of peptide antigen via MHC class I	8	1.8569	TAP1, HLA-A, ERAP2, HLA-B, CANX, HLA-F, BCAP31, B2M		GO:0043154	negative regulation of cysteine-type endopeptidase activity involved in apoptotic process	4	1.57168	XIAP, CD44, THBS1, YWHAE
	GO:1902042	negative regulation of extrinsic apoptotic signaling pathway via death domain receptors	8	1.63557	CFLAR, PEA15, TNFSF10, HMGB2, SFRP2, RAF1, TNFAIP3, DAPK1		GO:0009791	post-embryonic development	4	1.50883	GNAQ, MORC3, HEG1, SERP1
	GO:0010718	positive regulation of epithelial to mesenchymal transition	8	1.63557	DAB2, NOTCH1, HDAC2, TGFB3, SMAD4, SDCBP, SMAD3, BAMBI		GO:0022617	extracellular matrix disassembly	4	1.46435	CAPNS1, CD44, HSPG2, ADAMTS5
	GO:0034605	cellular response to heat	8	1.38673	IRAK1, HDAC2, LYN, C8ORF4, HSPA1A, THBS1, PDCD6, SCARA5		GO:0006928	movement of cell or subcellular component	4	1.3302	ACTB, ACTG1, ARPC1B, MSN
	GO:0010811	positive regulation of cell-substrate adhesion	8	1.33143	PPM1F, ARL2, RSU1, PTN, JAK2, ECM2, COL8A1, ABI3BP		GO:0001886	endothelial cell morphogenesis	3	2.34485	PECAM1, HEG1, STC1
	GO:0050921	positive regulation of chemotaxis	7	3.5607	PPM1F, STX4, RARRES2, CCL21, PDGFRB, CCL19, THBS1		GO:0034329	cell junction assembly	3	2.26833	ACTB, ACTG1, FBLIM1
	GO:0010596	negative regulation of endothelial cell migration	7	2.45928	PTPRM, SERPINF1, SYNJ2BP, DCN, THBS1, NR2F2, SLIT2		GO:0007043	cell-cell junction assembly	3	1.91912	TJP1, FSCN1, HEG1
	GO:0071294	cellular response to zinc ion	7	2.32784	TSPO, MT1M, MT1A, MT2A, PARP1, MT1X, MT1F		GO:0035329	hippo signaling	3	1.58228	TJP1, YWHAE, TJP2
	GO:0051894	positive regulation of focal adhesion assembly	7	2.09332	PPM1F, SFRP1, TEK, SMAD3, S100A10, COL16A1, IQGAP1		GO:0070389	chaperone cofactor-dependent protein refolding	2	1.3383	PTGES3, DNAJB1
	GO:0034314	Arp2/3 complex-mediated actin nucleation	7	1.98816	ACTR3, ARPC1A, ACTR2, ARPC1B, ARPC3, ARPC5L, ARPC5		GO:0043550	regulation of lipid kinase activity	2	1.3383	RBL2, RB1
	GO:0001731	formation of translation preinitiation complex	7	1.88995	EIF4B, EIF3A, EIF3G, EIF3E, EIF3F, EIF3K, MCTS1		GO:0006102	isocitrate metabolic process	2	1.3383	ACO2, IDH1
	GO:0042273	ribosomal large subunit biogenesis	7	1.71175	ZNF622, RPL35A, EBNA1BP2, SDAD1, RPL7, RPL26, RPL5		midnightblue
	GO:0051491	positive regulation of filopodium assembly	7	1.63065	CCL21, FSCN1, TGFB3, RALA, RHOQ, DPYSL3, SRF		GO:0006366	transcription from RNA polymerase II promoter	20	1.67937	ETV7, TFAP4, SNAPC2, NFRKB, FOXN1, SIX3, ARID3B, REST, FOSB, JUNB, TAF11, BARX1, ERCC6, PROP1, EBF2, FOXF1, IRF4, NCOR1, FOSL1, PITX1
	GO:0001569	patterning of blood vessels	7	1.48223	EDNRA, GNA13, SFRP2, EDN1, ENG, SRF, ACVR1		GO:0043065	positive regulation of apoptotic process	15	2.12822	BMP2, IL6, TFAP4, REST, PDCD1, STK3, SFRP4, DHODH, PTN, UBD, NSMAF, DCUN1D3, APBB2, ARL6IP5, FOSL1
	GO:0006294	nucleotide-excision repair, preincision complex assembly	7	1.41417	RPA2, ERCC5, UBB, PARP1, RPS27A, RBX1, RPA3		GO:0006954	inflammatory response	15	1.35949	CXCL1, IL6, BMP2, NFRKB, CRP, GPR68, NLRP2, S100A12, PROK2, ZAP70, ZC3H12A, BMPR1B, TNIP2, PTX3, SELE
	GO:0030449	regulation of complement activation	7	1.34979	C3AR1, CD55, C1QBP, C3, CFB, CFH, CFI		GO:0071222	cellular response to lipopolysaccharide	10	3.0283	ZFP36, MRC1, ARG1, SBNO2, IL6, UPF1, ZC3H12A, CDC73, SPON2, TNIP2
	GO:0051017	actin filament bundle assembly	7	1.34979	LIMA1, EPS8, AIF1, SWAP70, FSCN1, DPYSL3, LCP1		GO:0001501	skeletal system development	9	1.93856	ALPL, COL9A2, BMP2, DSPP, HOXA13, BMPR1B, PITX1, CDH11, ADAMTS4
	GO:2000379	positive regulation of reactive oxygen species metabolic process	7	1.34979	LEP, NOX4, PID1, TSPO, CD36, PDGFRB, THBS1		GO:0051591	response to cAMP	7	3.29221	FOSB, CNGA3, CARM1, AGXT, FOSL1, JUNB, ALDH3A1
	GO:0006098	pentose-phosphate shunt	6	2.80125	PGLS, TPI1, PGD, DERA, TKT, RPIA		GO:0006805	xenobiotic metabolic process	7	2.11127	UGT1A9, CYP2J2, FMO1, AKR1C1, DPEP1, ALDH3A1, S100A12
	GO:0060334	regulation of interferon-gamma-mediated signaling pathway	6	2.42161	HSP90AB1, JAK2, PIAS1, STAT1, CDC37, IFNGR1		GO:0001523	retinoid metabolic process	6	1.94587	APOA4, RPE65, LRP2, AKR1C1, SDC2, SDC3
	GO:0010952	positive regulation of peptidase activity	6	2.42161	CAV1, APP, NDUFA13, PSME4, PCOLCE, PCOLCE2		GO:0034332	adherens junction organization	5	2.05185	CDH9, CADM2, CDH18, CTNNA1, CDH11
	GO:0048193	Golgi vesicle transport	6	2.26224	PRKD1, ARL1, GOLPH3, GOLGA5, STX10, TRAPPC3		GO:0045600	positive regulation of fat cell differentiation	5	1.69523	ZFP36, BMP2, ZC3H12A, CARM1, STK3
	GO:0042554	superoxide anion generation	6	2.26224	NOX4, CYBA, CYBB, NCF1, EDN1, SOD1		GO:0071549	cellular response to dexamethasone stimulus	4	1.5864	ARG1, IL6, TFAP4, MSTN
	GO:0031529	ruffle organization	6	2.26224	LIMA1, PLEK, CCL21, TPM1, CSF1R, PLEKHA1		GO:0051971	positive regulation of transmission of nerve impulse	3	2.15755	HCRT, IL6, CARTPT
	GO:0019079	viral genome replication	6	2.26224	VCP, CD209, DEK, UBP1, GAS6, NFIA		GO:2000252	negative regulation of feeding behavior	3	2.15755	RETN, INS, MC4R
	GO:0055093	response to hyperoxia	6	1.86918	HDAC2, HDAC1, PDGFRB, BNIP3, CAT, CDK4		GO:0010888	negative regulation of lipid storage	3	1.89926	IL6, CRP, ITGB3
	GO:0034142	toll-like receptor 4 signaling pathway	6	1.76001	IRAK1, LY96, PIK3AP1, TRIL, ITGAM, CD14		GO:0006621	protein retention in ER lumen	3	1.79649	ANKRD13C, PDIA3, PDIA2
	GO:0031668	cellular response to extracellular stimulus	6	1.76001	P2RX7, LYN, AIF1, SFRP2, GSDMD, AXL		GO:0008228	opsonization	3	1.70594	CRP, SPON2, PTX3
	GO:0045807	positive regulation of endocytosis	6	1.76001	DAB2, GPC3, EEF2K, CCL19, DLL1, CD14		GO:0061158	3'-UTR-mediated mRNA destabilization	3	1.5523	ZFP36, UPF1, ZC3H12A
	GO:0045926	negative regulation of growth	6	1.65946	MT1M, GPC3, MT1A, MT2A, MT1X, MT1F		GO:0010745	negative regulation of macrophage derived foam cell differentiation	3	1.48607	CRP, CETP, ITGB3
	GO:0042098	T cell proliferation	6	1.65946	NCSTN, PIK3CG, PSMB10, P2RX7, CCND3, CD151		GO:0034975	protein folding in endoplasmic reticulum	3	1.48607	PDIA3, PDIA2, CANX
	GO:0042276	error-prone translesion synthesis	6	1.65946	RPA2, REV1, UBB, MAD2L2, RPS27A, RPA3		GO:0001878	response to yeast	3	1.48607	IL6, NPY, PTX3
	GO:1902236	negative regulation of endoplasmic reticulum stress-induced intrinsic apoptotic signaling pathway	6	1.65946	TXNDC12, XBP1, TMBIM6, HSPA1A, PTPN1, PARK7		GO:0045721	negative regulation of gluconeogenesis	3	1.42544	IL6, INS, SIK1
	GO:0014911	positive regulation of smooth muscle cell migration	6	1.5665	NOX4, PDGFRB, IGF1, POSTN, RPS6KB1, CCL5		GO:0015671	oxygen transport	3	1.36959	HBG1, CYGB, HBG2
	GO:0006801	superoxide metabolic process	6	1.5665	NOX4, CYBA, CYBB, SH3PXD2A, NCF1, SOD1		GO:0061036	positive regulation of cartilage development	3	1.31789	BMP10, BMP2, BMPR1B
	GO:0000027	ribosomal large subunit assembly	6	1.48028	RPL5, RPL24, RPL23A, RSL24D1, RPL12, MRPL20		GO:0070253	somatostatin secretion	2	1.3572	CARTPT, NPFF
	GO:1901687	glutathione derivative biosynthetic process	6	1.4001	MGST3, GSTM3, GSTA4, GSTK1, GSTT1, GSTP1		GO:0000294	nuclear-transcribed mRNA catabolic process, endonucleolytic cleavage-dependent decay	2	1.3572	UPF1, ZC3H12A
	GO:0001954	positive regulation of cell-matrix adhesion	6	1.4001	CDH13, CD36, SFRP1, CCL21, NINJ1, CIB1		GO:1903576	response to L-arginine	2	1.3572	INS, DHODH
	GO:0043044	ATP-dependent chromatin remodeling	6	1.32533	HDAC2, SMARCE1, HDAC1, ACTL6A, HNRNPC, SMARCA4		red
	GO:0000715	nucleotide-excision repair, DNA damage recognition	6	1.32533	COPS5, COPS7A, UBB, PARP1, RPS27A, RBX1		GO:0055114	oxidation-reduction process	60	2.91699	CYB5R1, OXA1L, ALDH1L1, PRDX4, PDIA5, PRDX1, HIBADH, MTHFD1L, AKR1C3, PTGIS, GPX4, GPX3, GFOD1, OXR1, NCF1, CYB5A, ACADL, RDH5, DHRS7, CYP4X1, ADO, DHRS3, DHRS4, PRDX6, UQCRH, TXN, CYBRD1, PCYOX1, SURF1, DEGS1, AOC3, HSD17B10, TMX1, PAM, ALDH18A1, GLUD1, C14ORF169, SESN1, GPD1L, DHCR7, CYP26B1, GSTO1, APEX1, NOX4, NDUFA8, FADS1, MAOA, MAOB, FADS3, CYP4F11, CRYZ, SOD1, BLVRA, ADI1, RDH10, TXNDC17,…
	GO:0051901	positive regulation of mitochondrial depolarization	5	2.08098	P2RX7, TSPO, MLLT11, DCN, PARP1		GO:0006412	translation	43	7.46456	RPL17, MRPS16, MRPL41, COPS5, MRPS11, RPL35, RPS15A, RPL38, RPL39, MRPS30, MRPL15, RPLP1, MRPL19, RPL10A, RPL7A, RPS20, RPS21, RPS23, RPS24, MRPL1, RPL35A, MRPL51, SLC25A4, MRPS23, SLC25A5, MRPS24, RPL26, RPS9, MRPS5, RPL24, MRPS21, MRPS6, RPS4X, RPS5, MRPL24, TARS, RPS18, MRPS9, RPL23, RPS17, RPL13A, PELO, NHP2
	GO:2000406	positive regulation of T cell migration	5	2.08098	AIF1, CCL21, TNFRSF14, CCL5, CXCL12		GO:0007155	cell adhesion	43	1.65644	IGFBP7, BCAR1, ITGAE, NEDD9, SPOCK1, CDH2, CX3CL1, CD151, ALCAM, CD47, CD9, WISP2, LAMB2, SRPX, ITGAV, FAT1, RHOB, ZYX, LAMB1, COL8A1, THBS2, LPP, COL15A1, CD99, MFGE8, MCAM, COL16A1, SSPN, GAS6, EMILIN1, CDH13, ITGA9, PGM5, ITGA5, ITGA8, CD99L2, VCAN, LAMC1, TGFB1I1, MFAP4, AOC3, MYH10, PARVA
	GO:0006613	cotranslational protein targeting to membrane	5	2.08098	SRP14, TRAM2, SRP19, TRAM1, SSR1		GO:0008283	cell proliferation	36	1.708	CKS1B, TSPO, BCAR1, UCHL1, CSPG4, BOP1, TCF7L2, PRDX1, GPC4, SETMAR, WDR12, FRAT2, YAP1, AXIN2, TFDP1, CRIP1, RAF1, CDK7, PURB, TACC1, GAS6, DDIT4, DCTN2, PRKD1, HHEX, PLCE1, LAMA5, GNB1, GOLPH3, TXN, ADRA1B, H3F3A, PELO, H3F3B, FOXC1, MYH10
	GO:0033197	response to vitamin E	5	1.91585	LEP, MEF2C, CCND1, HMGCS1, CAT		GO:0006413	translational initiation	33	9.54597	RPL17, COPS5, RPL35, RPS15A, RPL38, RPL39, EIF3H, RPLP1, EIF3K, EIF3L, EIF3I, RPL10A, RPL7A, RPS20, EIF2B2, RPS21, RPS23, EIF2B5, RPS24, RPL35A, RPL26, RPS9, RPL24, EIF1B, RPS4X, RPS5, RPS18, RPL23, RPS17, RPL13A, EIF4A2, EIF2S1, EIF4A1
	GO:0009268	response to pH	5	1.77082	PAM, KCNJ8, GJA1, CA2, CLCN7		GO:0006364	rRNA processing	33	4.85996	RPL17, UTP6, RPL35, RPS15A, BOP1, RPL38, RPL39, EBNA1BP2, WDR55, RPLP1, NPM3, WDR12, RPL10A, RPL7A, RPS20, RPS21, RPS23, RPS24, RPL35A, CCDC86, EXOSC4, RPL26, RPS9, RPL24, RPS4X, RPS5, FBL, RPS18, RPL23, RPS17, RPL13A, POP4, WDR46
	GO:0060766	negative regulation of androgen receptor signaling pathway	5	1.77082	DAB2, SFRP1, HDAC1, PHB, SMARCA4		GO:0016032	viral process	30	1.57421	XPO1, TLN1, NUP160, SYNCRIP, CALCOCO2, RBX1, PSMB5, CUL2, PSMB7, SET, COPB1, KRT8, GTF2A2, PSMB2, ZYX, CCDC86, SLC25A4, NUP88, SLC25A5, UBR4, MFGE8, SPEN, LMBRD1, C1QBP, PSMC2, EIF4A2, NUP205, EIF4A1, PDGFRA, DYNC1I2
	GO:0097028	dendritic cell differentiation	5	1.77082	LYN, AXL, TREM2, AZI2, GAS6		GO:0043065	positive regulation of apoptotic process	30	1.55551	TSPO, PNMA2, CLU, BNIP3, FOXO1, ZBTB16, MOAP1, HOXA5, CNR1, DNAJA1, RHOB, PHLDA3, EIF2B5, NOX4, ARHGEF17, FRZB, CDK4, SOD1, DAPK3, SLIT2, NOTCH1, C1QBP, IGF2R, PDGFRB, ID3, UBB, PDCD5, GADD45A, IGFBP3, NGF
	GO:0032516	positive regulation of phosphoprotein phosphatase activity	5	1.64205	HSP90AB1, PDGFRB, JAK2, PPP1R15A, CALM1		GO:0000398	mRNA splicing, via spliceosome	29	3.07636	POLR2G, POLR2F, POLR2L, POLR2I, ZMAT2, LSM7, SYNCRIP, POLR2C, XAB2, BUD31, YBX1, POLR2A, PRPF19, CD2BP2, PRPF8, DHX15, DHX16, SRRM1, SNRPA1, SNRPN, SPEN, DDX5, HNRNPA0, PAPOLA, RBPMS, GTF2F1, SNRNP200, SNRPF, CPSF3
	GO:0006878	cellular copper ion homeostasis	5	1.64205	APP, MT2A, PRND, SLC31A2, SCO1		GO:0098609	cell-cell adhesion	28	1.63002	CNN3, CALD1, SNX2, RDX, TAGLN2, PRDX1, BZW2, RPL7A, EHD1, GOLGA2, ARGLU1, COBLL1, VASN, TBC1D10A, PFKP, RPL24, FLNB, PARK7, MPRIP, NOTCH3, TMEM47, CRKL, PRDX6, USO1, PTPN1, PERP, AHSA1, SH3GL1
	GO:1900025	negative regulation of substrate adhesion-dependent cell spreading	5	1.64205	CORO1C, RCC2, TACSTD2, POSTN, GBP1		GO:0090090	negative regulation of canonical Wnt signaling pathway	27	4.55355	CAV1, IGFBP6, FOXO1, CDH2, TCF7L2, RBX1, PSMB5, CHD8, PSMB7, PSMD1, PSMB2, PSMD2, AXIN2, PSMD8, FRZB, DDIT3, PSMD14, NOTCH1, PSMC5, SOST, DACT3, SCYL2, PSMA5, PSMC2, PFDN5, UBB, IGFBP2
	GO:0032026	response to magnesium ion	5	1.64205	D2HGDH, TNFRSF11B, CCND1, THBS1, CD14		GO:0006936	muscle contraction	26	7.60491	TLN1, ACTA1, ACTA2, CRYAB, CALD1, ITGA1, GJA1, TPM2, SSPN, TPM1, MYL9, ACTG2, STAC, MYL6B, SLMAP, CKMT2, MYH11, CACNA1H, MYOM1, LMOD1, SGCA, CALM2, HRC, SNTA1, CALM1, TMOD1
	GO:0045730	respiratory burst	5	1.64205	CYBA, CD55, CYBB, NCF1, SLC37A4		GO:0000184	nuclear-transcribed mRNA catabolic process, nonsense-mediated decay	26	6.64201	RPL17, RPL35, RPS15A, RPL38, RPL39, RPLP1, RPL7A, RPL10A, RPS20, RPS21, RPS23, RPS24, PPP2R1A, RPL35A, SMG5, RPL26, RPS9, RPL24, RPS4X, RPS5, RPS18, GSPT1, RPL23, RPS17, RPL13A, PPP2R2A
	GO:0006957	complement activation, alternative pathway	5	1.64205	C3, CFB, CFH, CFD, VSIG4		GO:0030198	extracellular matrix organization	26	2.87859	ITGAE, PRDX4, ABI3BP, CD47, SMOC2, LAMB2, ITGAV, COL8A1, LAMB1, COL8A2, COL4A1, ITGA1, ECM2, COL16A1, COL5A2, EMILIN1, ITGA9, ITGA5, LAMA5, KAZALD1, FBLN5, ITGA8, VCAN, LAMC1, MFAP5, JAM3
	GO:0030970	retrograde protein transport, ER to cytosol	5	1.52675	HSP90B1, DERL2, SEC61B, VCP, FAF2		GO:0006614	SRP-dependent cotranslational protein targeting to membrane	25	8.13731	RPL17, SRP68, RPL35, RPS15A, RPL38, RPL39, RPLP1, RPS20, RPL7A, RPL10A, RPS21, RPS23, SEC61A1, RPS24, RPL35A, RPL26, RPS9, RPL24, SRPRB, RPS4X, RPS5, RPS18, RPL23, RPS17, RPL13A
	GO:0001516	prostaglandin biosynthetic process	5	1.52675	PTGES3, PTGIS, PTGDS, EDN1, MIF		GO:0019083	viral transcription	25	6.57068	RPL17, NUP160, RPL35, RPS15A, RPL38, RPL39, RPLP1, RPS20, RPL7A, RPL10A, RPS21, RPS23, RPS24, RPL35A, NUP88, RPL26, RPS9, RPL24, RPS4X, RPS5, RPS18, RPL23, RPS17, RPL13A, NUP205
	GO:0042993	positive regulation of transcription factor import into nucleus	5	1.42275	TMEM173, XBP1, HCLS1, SMAD3, PIK3R2		GO:0006457	protein folding	24	2.7047	TMX1, GANAB, HSP90AA1, CRYAB, FKBP5, LTBP4, AARS, CCT2, PDIA5, CCT3, AIP, LRPAP1, TTC1, HSP90B1, DNAJB11, GNB1, PFDN5, PFDN4, PPIC, TXN, TBCC, DNAJA1, HSPE1, FKBP10
	GO:0043403	skeletal muscle tissue regeneration	5	1.42275	CFLAR, NACA, MTPN, PAX7, GJA1		GO:0007507	heart development	24	2.61107	PAM, CRIP1, MAP2K1, ADIPOR2, PDLIM3, RAF1, GJA1, CXADR, SRF, PTPN11, SENP2, NOTCH1, PLCE1, CRKL, NCOA6, PKD2, PPP3CB, PKD1, FOXC1, ID3, COX17, PCSK5, TCF25, ACVR1
	GO:0043277	apoptotic cell clearance	5	1.42275	CD36, ITGAV, TXNDC5, AXL, GAS6		GO:0043161	proteasome-mediated ubiquitin-dependent protein catabolic process	24	2.05846	UCHL1, BTBD6, CDC23, PCNP, CDC34, RNF181, DDIT3, RBX1, PSMB5, KCTD10, BFAR, PSMD14, PSMB7, PSMC5, VCP, PSMA5, BTBD1, PSMC2, PSMB2, PSMD1, PSMD2, UBB, TBL1X, PSMD8
	GO:0002042	cell migration involved in sprouting angiogenesis	5	1.42275	EFNB2, GREM1, SRF, EPHB4, SLIT2		GO:0070125	mitochondrial translational elongation	23	7.63048	MRPL53, TUFM, MRPL1, MRPS16, MRPL51, MRPL41, MRPS23, MRPS24, MRPS11, MRPS5, MRPS21, MRPS6, MRPS31, MRPS30, MRPL24, MRPL12, MRPL15, MRPS9, GFM1, MRPL54, MRPL19, MRPL46, MRPL33
	GO:0010744	positive regulation of macrophage derived foam cell differentiation	5	1.32839	LPL, CD36, PLA2G2A, PRKCH, NFKB1		GO:0016055	Wnt signaling pathway	23	2.17793	VPS29, FERMT2, TLE1, FRZB, APCDD1, TCF7L2, DDIT3, CALCOCO1, TCF7L1, RBX1, SENP2, HHEX, SOST, WDR61, CPE, DACT3, ZBED3, VPS35, PRKAA1, UBB, TGFB1I1, AXIN2, LRP5
	GO:0051895	negative regulation of focal adhesion assembly	5	1.32839	CORO1C, RCC2, APOD, THBS1, PTEN		GO:0007420	brain development	22	1.81309	COL4A1, TSPAN2, PTPRG, ARNT2, BMPR2, ACAT1, DDIT4, PTPN11, CKB, CD9, IMMP2L, CHD8, MAP1S, ITGA8, NCOA6, PHGDH, H3F3A, PPP3CC, FOXC1, H3F3B, COX17, ZFHX3
	GO:0010608	posttranscriptional regulation of gene expression	5	1.32839	CAV1, TDRD7, PUM1, PUM2, CDC37		GO:0070126	mitochondrial translational termination	21	6.17835	MRPL53, MRPL1, MRPS16, MRPL51, MRPL41, MRPS23, MRPS24, MRPS11, MRPS5, MRPS6, MRPS21, MRPS31, MRPS30, MRPL24, MRPL12, MRPL15, MRPS9, MRPL54, MRPL19, MRPL46, MRPL33
	GO:0090026	positive regulation of monocyte chemotaxis	5	1.32839	AIF1, PLA2G7, CCL5, CXCL12, ANO6		GO:0030335	positive regulation of cell migration	21	1.6805	F10, NTF3, ACTN4, MYO1C, BCAR1, RDX, MCAM, DAPK3, CDH13, NOTCH1, ITGA5, XBP1, ITGAV, F3, SEMA4C, PDGFRA, PDGFRB, PDGFC, RHOD, LAMB1, ACVR1
	GO:0071447	cellular response to hydroperoxide	4	2.21944	CD36, AIF1, TP53INP1, OXR1		GO:0000209	protein polyubiquitination	21	1.6805	RUSC1, CDC34, UBE3C, RNF181, RBX1, PRPF19, PSMB5, BFAR, RNF114, PSMD14, PSMB7, PSMC5, PSMA5, PSMC2, PSMB2, PSMD1, PSMD2, FBXO31, UBB, PSMD8, TRIP12
	GO:0002503	peptide antigen assembly with MHC class II protein complex	4	2.21944	HLA-DRB4, HLA-DMB, HLA-DMA, HLA-DRA		GO:0002576	platelet degranulation	20	4.35889	TLN1, PHACTR2, CYB5R1, A2M, ACTN4, CLU, PCDH7, CD63, SOD1, GAS6, CD9, CLEC3B, SERPINF2, LEFTY2, SERPINA3, HABP4, TUBA4A, PROS1, CALM2, CALM1
	GO:0046931	pore complex assembly	4	1.94789	P2RX7, CCT8, GSDMD, ANO6		GO:0001666	response to hypoxia	20	1.68722	NOX4, PAM, CAV1, ACVRL1, AHCY, NOL3, ACTN4, PGF, CRYAB, ARNT2, RAF1, BNIP3, KCNA5, USF1, SRF, DDIT4, SLC2A8, HSP90B1, PRKAA1, ALKBH5
	GO:2000107	negative regulation of leukocyte apoptotic process	4	1.94789	CCL21, HCLS1, CCL19, CXCL12		GO:0090263	positive regulation of canonical Wnt signaling pathway	19	3.01487	CAV1, DAPK3, PIN1, PSMB5, PSMD14, PSMB7, PSMC5, PSMA5, PSMC2, ZBED3, PSMD1, PSMB2, PSMD2, VPS35, UBB, YAP1, AXIN2, BAMBI, PSMD8
	GO:0009404	toxin metabolic process	4	1.94789	ARL1, PAM, CYP1B1, FMO2		GO:0043488	regulation of mRNA stability	18	3.36219	XPO1, EXOSC4, PSMB5, PSMD14, PSMB7, PSMC5, SET, PSMA5, PSMC2, PSMD1, PSMB2, PUM1, PSMD2, HSPB1, UBB, APEX1, PSMD8, SAMD4B
	GO:0014033	neural crest cell differentiation	4	1.94789	MEF2C, SMAD4, FRZB, HTR2B		GO:0006888	ER to Golgi vesicle-mediated transport	18	1.422	COPZ2, DYNC1LI2, NRBP1, F10, GAS6, BCAP31, DCTN2, TMED7, VCP, GORASP1, COPB1, CNIH4, USO1, PROS1, DYNC1I2, NRBP2, GOLGA2, GOLGB1
	GO:0019885	antigen processing and presentation of endogenous peptide antigen via MHC class I	4	1.73418	TAP1, HLA-A, ERAP2, B2M		GO:0001558	regulation of cell growth	17	4.20135	TSG101, BCAR1, IGFBP7, LTBP4, IGFBP6, SPOCK1, NOV, PLCE1, WISP2, HTRA1, KAZALD1, FBLN5, WFDC1, ITCH, IGFBP2, IGFBP3, IGFBP5
	GO:0048102	autophagic cell death	4	1.73418	LAMP1, CDKN1B, BNIP3, TP53INP1		GO:0001649	osteoblast differentiation	17	2.86059	ERH, PHB, GJA1, SYNCRIP, LRRC17, FBL, PSMC2, SNRNP200, GDF10, H3F3A, HSPE1, VCAN, H3F3B, IGFBP3, RDH14, IGFBP5, TWIST1
	GO:0006734	NADH metabolic process	4	1.73418	GPD1L, VCP, MDH2, MDH1		GO:0006367	transcription initiation from RNA polymerase II promoter	17	1.33551	POLR2G, POLR2F, NRBP1, POLR2L, RXRB, POLR2I, TEAD2, CDK7, POLR2C, POLR2A, NOTCH3, MED6, NOTCH1, GTF2F1, NCOA6, GTF2A2, YAP1
	GO:2000270	negative regulation of fibroblast apoptotic process	4	1.73418	PIK3CG, SFRP1, API5, GAS6		GO:0032981	mitochondrial respiratory chain complex I assembly	16	4.92001	NDUFA5, NDUFB5, OXA1L, NDUFA3, NDUFB6, NDUFB10, NDUFA8, NDUFB7, NDUFAB1, NDUFA1, NDUFAF2, NDUFA12, NDUFB2, NDUFA11, NDUFS5, NDUFS8
	GO:0010870	positive regulation of receptor biosynthetic process	4	1.73418	HDAC2, HDAC1, HOXA5, EDN1		GO:0007517	muscle organ development	16	3.13149	AEBP1, CRYAB, FHL1, SMTN, XBP1, LAMA5, VAMP5, CACNA1H, SGCD, MKX, SGCE, ID3, ZFHX3, SGCA, TWIST1, SGCB
	GO:0017121	phospholipid scrambling	4	1.73418	P2RX7, PLSCR4, PLSCR3, ANO6		GO:0007229	integrin-mediated signaling pathway	16	2.64976	BCAR1, ITGAE, FERMT2, ITGA1, NEDD9, COL16A1, PTPN11, PRKD1, ITGA9, CD47, ITGA5, LAMA5, ITGAV, ITGA8, ZYX, ITFG2
	GO:1903071	positive regulation of ER-associated ubiquitin-dependent protein catabolic process	4	1.55924	CAV1, XBP1, UBQLN2, BCAP31		GO:0007050	cell cycle arrest	16	1.31441	MAP2K1, TSG101, PRKAB1, RRAGA, STRADB, CDK7, TCF7L2, DDIT3, GAS6, CUL2, PKD2, PKD1, RHEB, PRKAA1, GADD45A, ZFHX3
	GO:0001945	lymph vessel development	4	1.55924	EFNB2, HEG1, NR2F2, SYK		GO:0006120	mitochondrial electron transport, NADH to ubiquinone	15	5.63589	NDUFA5, NDUFB5, NDUFB6, NDUFB10, NDUFA3, NDUFA8, NDUFB7, NDUFAB1, NDUFA1, NDUFA12, NDUFB2, NDUFA11, NDUFS5, NDUFS8, DLD
	GO:1904706	negative regulation of vascular smooth muscle cell proliferation	4	1.55924	CDKN1B, TGFB3, TPM1, GSTP1		GO:0060071	Wnt signaling pathway, planar cell polarity pathway	15	2.52725	AP2S1, DAAM1, GPC4, PSMB5, PSMB7, PSMD14, PSMC5, PSMA5, PSMC2, PSMD1, PSMB2, ROR1, PSMD2, UBB, PSMD8
	GO:0033689	negative regulation of osteoblast proliferation	4	1.55924	SFRP1, SMAD3, EIF2AK2, GREM1		GO:0007219	Notch signaling pathway	15	1.68805	NOTCH3, HHEX, S1PR3, NOTCH1, GMDS, PLN, HEYL, WDR12, TIMP4, FOXC1, ITCH, SPEN, KCNA5, UBB, PERP
	GO:0048245	eosinophil chemotaxis	4	1.41218	CCL13, LGALS3, CCL5, SCG2		GO:0006283	transcription-coupled nucleotide-excision repair	14	2.95943	POLR2G, POLR2F, POLR2L, COPS5, COPS4, POLR2I, COPS7A, CDK7, POLR2C, XAB2, POLR2A, RBX1, PRPF19, UBB
	GO:0071404	cellular response to low-density lipoprotein particle stimulus	4	1.41218	CD9, NPC1, CD36, SYK		GO:0006928	movement of cell or subcellular component	14	2.35966	TLN1, MAP2K1, CAPZA2, CALD1, ABI3, TPM1, ACTR3, CD9, ACTR2, ARPC3, SPINT2, TXN, HSPB1, WASL
	GO:0002480	antigen processing and presentation of exogenous peptide antigen via MHC class I, TAP-independent	4	1.41218	HLA-A, HLA-B, HLA-F, B2M		GO:1902600	hydrogen ion transmembrane transport	13	3.22591	COX7A2, COX7A1, UQCRH, COX7B, COX6B1, COX6A1, CYB5A, ATP6V1G1, SLC47A1, UQCRFS1, COX5A, UQCRQ, SURF1
	GO:1904851	positive regulation of establishment of protein localization to telomere	4	1.41218	CCT7, DKC1, CCT8, CCT2		GO:0002479	antigen processing and presentation of exogenous peptide antigen via MHC class I, TAP-dependent	13	3.09407	NCF1, HLA-G, PSMB5, PSMB7, PSMD14, PSMC5, PSMA5, ITGAV, PSMC2, PSMD1, PSMB2, PSMD2, PSMD8
	GO:1900027	regulation of ruffle assembly	4	1.41218	CORO1C, CAV1, RCC2, RHOG		GO:0034976	response to endoplasmic reticulum stress	13	2.42209	P4HB, TMX1, HSP90B1, SRPX, XBP1, WFS1, EIF2S1, TARDBP, TRIB3, PDIA5, FAM129A, DDIT3, EIF2B5
	GO:0045647	negative regulation of erythrocyte differentiation	4	1.41218	ZFP36L1, MAFB, HOXA5, HSPA9		GO:0032869	cellular response to insulin stimulus	13	2.32679	RHOQ, FOXO1, TRIB3, LPIN1, USF1, PPAT, APRT, RAB31, XBP1, RAB13, PARP1, ERRFI1, GSTP1
	GO:0090073	positive regulation of protein homodimerization activity	4	1.41218	MEF2C, CRBN, GNL3L, PARK7		GO:0031145	anaphase-promoting complex-dependent catabolic process	13	2.23552	PSMB5, PSMD14, PSMB7, PSMC5, PSMA5, PSMC2, PSMB2, PSMD1, PSMD2, FBXO31, CDC23, UBB, PSMD8
	GO:1903679	positive regulation of cap-independent translational initiation	3	1.65569	METTL3, NCK1, YTHDF2		GO:0007160	cell-matrix adhesion	13	1.79661	EPDR1, FERMT2, ITGA1, ECM2, CD63, SRF, ITGAV, ITGA8, FBLN5, PKD1, SGCE, ZYX, JAM3
	GO:1904044	response to aldosterone	3	1.65569	CYBA, CYBB, PARP1		GO:0002223	stimulatory C-type lectin receptor signaling pathway	13	1.33449	UBE2N, PSMB5, PSMD14, PSMB7, PSMC5, PSMA5, PSMC2, PSMB2, PSMD1, PSMD2, RAF1, UBB, PSMD8
	GO:0031440	regulation of mRNA 3'-end processing	3	1.65569	ZFP36L1, PAPOLA, AHCYL1		GO:0001764	neuron migration	13	1.33449	HSP90AA1, NDN, NAV1, AXL, PEX5, GJA1, SPOCK1, NR2F2, SRF, GAS6, DDIT4, TWIST1, MYH10
	GO:0010560	positive regulation of glycoprotein biosynthetic process	3	1.65569	CCL21, CCL19, IGF1		GO:0006986	response to unfolded protein	12	4.16589	HSPH1, HSP90AA1, DERL1, HSPA2, HSPB7, HSPB2, DNAJA1, HSPB1, HSPE1, HSPB3, SERPINH1, DDIT3
	GO:0002902	regulation of B cell apoptotic process	3	1.65569	LYN, PTEN, BTK		GO:0038061	NIK/NF-kappaB signaling	12	2.40249	PSMB5, PSMD14, PSMB7, PSMC5, PSMA5, PSMC2, PSMB2, PSMD1, UBE2M, PSMD2, UBB, PSMD8
	GO:0045906	negative regulation of vasoconstriction	3	1.38082	LEP, ADM, BMPR2		GO:0098869	cellular oxidant detoxification	12	2.20334	MGST3, TXNDC17, PRDX6, GPX4, GPX3, TXN, PRDX4, GSTO1, SESN1, PARK7, GSTP1, MGST2
	GO:0050878	regulation of body fluid levels	3	1.38082	APLNR, HEG1, PDSS2		GO:0051436	negative regulation of ubiquitin-protein ligase activity involved in mitotic cell cycle	12	2.15645	PSMB5, PSMD14, PSMB7, PSMC5, PSMA5, PSMC2, PSMB2, PSMD1, PSMD2, CDC23, UBB, PSMD8
	GO:0071672	negative regulation of smooth muscle cell chemotaxis	3	1.38082	AIF1, SLIT2, GSTP1		GO:0048010	vascular endothelial growth factor receptor signaling pathway	12	2.11063	PRKD1, HSP90AA1, ROCK1, XBP1, NCF1, PGF, ITGAV, BCAR1, BMPR2, AXL, HSPB1, FOXC1
	GO:0032269	negative regulation of cellular protein metabolic process	3	1.38082	EDN1, NFKB1, MIF		GO:0043086	negative regulation of catalytic activity	12	1.97939	NOSIP, PHACTR2, NOTCH1, PPP1R2, SET, PLN, ARPP19, APBA3, TIMP4, ACACB, ANXA5, PPP1R14A
	GO:0003273	cell migration involved in endocardial cushion formation	3	1.38082	NOTCH1, SNAI2, ENG		GO:0051437	positive regulation of ubiquitin-protein ligase activity involved in regulation of mitotic cell cycle transition	12	1.9376	PSMB5, PSMD14, PSMB7, PSMC5, PSMA5, PSMC2, PSMB2, PSMD1, PSMD2, CDC23, UBB, PSMD8
	green						GO:0001503	ossification	12	1.7795	SOST, CLEC3B, KAZALD1, FSTL3, MGP, LRRC17, FOXC1, NPR2, RPL38, EXT1, COL5A2, TWIST1
	GO:0007186	G-protein coupled receptor signaling pathway	18	1.69669	MCHR1, OPN1LW, RRH, OR2J2, OR52E4, GPRC6A, OR2W3, GPR32, OR4C13, PTGIR, CCL22, OR10AD1, OR10X1, GRPR, OR2T8, GNG4, OR6N1, OR5B21		GO:0051897	positive regulation of protein kinase B signaling	12	1.63475	AKR1C3, NOX4, F10, C1QBP, XBP1, F3, TXN, AXL, TCF7L2, GAS6, PARK7, IGFBP5
	GO:0000122	negative regulation of transcription from RNA polymerase II promoter	13	1.00788	HOXD9, ASCL1, ETV7, PROP1, NR1D1, ID2, SOX3, PKIG, TAF9B, NR2F6, POU4F2, VAX2, ZBTB1		GO:0006368	transcription elongation from RNA polymerase II promoter	12	1.56694	ENY2, POLR2G, POLR2F, POLR2L, GTF2F1, POLR2I, GTF2A2, TCEB2, CDK7, SUPT4H1, POLR2C, POLR2A
	GO:0007601	visual perception	11	4.11991	MYO5A, CLDN19, OPN1LW, RRH, SIX3, BFSP2, VAX2, RPE65, CABP4, CRYBA1, NYX		GO:0030512	negative regulation of transforming growth factor beta receptor signaling pathway	11	2.03149	RASL11B, VASN, GLG1, CAV1, STRAP, HTRA1, XBP1, TGFB1I1, UBB, BAMBI, PIN1
	GO:0006955	immune response	9	1.03439	KAAG1, CCL22, HLA-DRB1, TLR1, SAMHD1, SEMA3C, CD164, FTH1, HLA-DQA1		GO:0042795	snRNA transcription from RNA polymerase II promoter	11	1.76863	POLR2G, POLR2F, POLR2L, GTF2F1, POLR2I, GTF2A2, CDK7, INTS3, INTS10, POLR2C, POLR2A
	GO:0050911	detection of chemical stimulus involved in sensory perception of smell	9	1.01672	OR4C13, OR10AD1, OR10X1, OR2J2, OR52E4, OR2T8, OR2W3, OR6N1, OR5B21		GO:0045454	cell redox homeostasis	11	1.50694	P4HB, TMX1, PRDX6, NCF1, DLD, TXN, PRDX4, PDIA5, APEX1, PRDX1, DDIT3
	GO:0007264	small GTPase mediated signal transduction	8	1.72328	RND1, RASEF, RAB11B, RUNDC3A, RHOT2, ERAS, RHOF, DOCK4		GO:0046718	viral entry into host cell	11	1.40737	LDLR, ITGA5, SLC20A2, XPR1, ITGAV, AXL, DYNLT1, ITCH, KPNA3, CXADR, GAS6
	GO:0007218	neuropeptide signaling pathway	5	1.6013	MCHR1, ECEL1, PMCH, NPFFR1, NPFF		GO:0034446	substrate adhesion-dependent cell spreading	10	3.15584	LAMA5, ITGAV, ITGA8, FERMT2, FGFRL1, AXL, VAMP3, LAMC1, LAMB1, PARVA
	GO:0006367	transcription initiation from RNA polymerase II promoter	5	1.06485	TAF11, NR1D1, TAF9B, NR2F6, TEAD3		GO:0031100	organ regeneration	10	2.46766	NOTCH1, PGF, IGF2R, AXL, CDK4, LPIN1, GAS6, GSTP1, PPAT, NNMT
	GO:0007608	sensory perception of smell	5	1.01056	OR10AD1, OR2J2, OR2T8, OR2W3, OR6N1		GO:0010467	gene expression	10	2.40336	NOX4, POLR2G, POLR2F, POLR2L, GOLPH3, GTF2F1, POLR2I, POLR2C, HNRNPA0, POLR2A
	GO:0045665	negative regulation of neuron differentiation	4	1.62945	ASCL1, ID2, SOX3, SIX3		GO:0021762	substantia nigra development	10	2.34109	YWHAH, GLUD1, MAOB, UCHL1, ATP5F1, COX6B1, CALM2, ATP5J, CALM1, CKB
	GO:0030879	mammary gland development	3	1.66007	HOXD9, TDGF1, FASN		GO:0006521	regulation of cellular amino acid metabolic process	10	2.22223	PSMB5, PSMD14, PSMB7, PSMC5, PSMA5, PSMC2, PSMB2, PSMD1, PSMD2, PSMD8
	GO:0016338	calcium-independent cell-cell adhesion via plasma membrane cell-adhesion molecules	3	1.66007	CLDN17, CLDN19, CLDN5		GO:0032091	negative regulation of protein binding	10	1.9057	SENP2, CAV1, PPP1CA, ROCK1, SLPI, GNL3L, PARK7, GOLGA2, LRPAP1, PIN1
	GO:0003333	amino acid transmembrane transport	3	1.51753	SLC38A4, SLC6A14, SLC7A10		GO:0036498	IRE1-mediated unfolded protein response	10	1.81182	TLN1, DNAJB11, PPP2R5B, XBP1, WFS1, PDIA5, PTPN1, SRPRB, SEC61A1, SSR1
	GO:0007602	phototransduction	3	1.45552	OPN1LW, RRH, CABP4		GO:0016197	endosomal transport	10	1.52113	CHMP4C, TSG101, SNX27, SNF8, VPS4B, RAB13, UBB, ABCA1, VPS36, VPS25
	GO:0006865	amino acid transport	3	1.25087	SLC38A4, SLC6A14, SLC7A10		GO:0042776	mitochondrial ATP synthesis coupled proton transport	9	4.45537	CYC1, ATP5F1, ATP5C1, ATP5L, STOML2, ATP5O, COX5B, ATP5H, ATP5J
	GO:0048469	cell maturation	3	1.2291	ASCL1, ID2, BFSP2		GO:0050999	regulation of nitric-oxide synthase activity	9	3.70011	NOSIP, CAV1, HSP90AA1, WASL, PTS, DDAH2, DDAH1, CALM2, CALM1
	GO:0007631	feeding behavior	3	1.18759	MCHR1, PMCH, MC4R		GO:0050434	positive regulation of viral transcription	9	3.33889	POLR2G, NOTCH1, POLR2F, POLR2L, GTF2F1, POLR2I, SUPT4H1, POLR2C, POLR2A
	GO:0060706	cell differentiation involved in embryonic placenta development	2	1.19396	KRT19, KRT8		GO:0006446	regulation of translational initiation	9	2.67111	EIF3H, EIF4A2, EIF4A1, EIF3K, EIF3L, HSPB1, EIF3I, EIF1B, EIF2B2
	GO:2000427	positive regulation of apoptotic cell clearance	2	1.12936	C4B, C2		GO:2001237	negative regulation of extrinsic apoptotic signaling pathway	9	2.51395	PHIP, NOL3, ITGAV, BIRC6, YAP1, TCF7L2, PARK7, GSTP1, ACVR1
	GO:0009584	detection of visible light	2	1.02491	OPN1LW, RRH		GO:0000302	response to reactive oxygen species	9	2.43987	NOX4, P4HB, NUDT2, PRDX6, GPX3, TXN, SOD1, PRDX1, GSTP1
	red						GO:0006418	tRNA aminoacylation for protein translation	9	2.36855	TARS, YARS, NARS, AIMP2, AARS, GARS, LARS, IARS2, MARS
	GO:0006936	muscle contraction	18	16.7013	ACTA2, CRYAB, CALD1, ITGA1, TPM2, VCL, MYL9, ACTG2, DES, SORBS1, CKMT2, MYH11, CACNA1H, MYOM1, LMOD1, MYLK, SGCA, TMOD1		GO:0075733	intracellular transport of virus	9	1.73012	XPO1, NUP160, TSG101, NUP88, NUP205, KPNA4, UBB, KPNA3, KPNB1
	GO:0000122	negative regulation of transcription from RNA polymerase II promoter	12	1.41453	AEBP1, TAGLN, LAMA5, CRYAB, FHL1, CACNA1H, SGCA		GO:0048146	positive regulation of fibroblast proliferation	9	1.5925	FNTB, BMI1, FOSL2, ZMIZ1, PDGFRA, PDGFRB, PDGFC, CDK4, GAS6
	GO:0007155	cell adhesion	10	1.82895	SORBS1, PDLIM3, ACTN1, LMOD1, TPM2, TMOD1		GO:0060548	negative regulation of cell death	9	1.54938	PRKD1, NOV, WISP2, TMEM109, MGMT, VPS4B, BNIP3, TEAD2, PARK7
	GO:0008285	negative regulation of cell proliferation	8	1.31688	HEYL, HEY2, FOXC1		GO:0006099	tricarboxylic acid cycle	8	2.6148	DLST, SDHB, SUCLG2, DLD, SDHD, PDHA1, MDH1, FH
	GO:0007517	muscle organ development	7	4.00286	SORBS1, FBLN5, ITGA8, FERMT2, ITGA1, VCL		GO:0006611	protein export from nucleus	8	2.52471	NXT1, XPO1, NUP88, PKD1, EIF5A, NUTF2, AHCYL1, STRADB
	GO:0030198	extracellular matrix organization	7	2.21881	SORBS1, LAMA5, FERMT2, ACTN1		GO:0006370	7-methylguanosine mRNA capping	8	2.27851	POLR2G, POLR2F, POLR2L, GTF2F1, POLR2I, CDK7, POLR2C, POLR2A
	GO:0001525	angiogenesis	7	1.95703	DES, PLN, HSPB7, CACNA1H		GO:0006626	protein targeting to mitochondrion	8	2.20357	TSPO, PDE2A, TIMM9, TIMM10, TOMM20, TOMM40, TIMM44, AIP
	GO:0007015	actin filament organization	6	3.4748	NOTCH3, PLN, HEYL, HEY2, FOXC1, KCNA5		GO:0008033	tRNA processing	8	1.99699	PUS3, ELAC2, LAGE3, AARS, POP4, PUS7, POP7, FBL
	GO:0007160	cell-matrix adhesion	6	3.02967	NOV, RERG, DACT3, CRYAB, FHL1, WFDC1		GO:0045668	negative regulation of osteoblast differentiation	8	1.87269	NOTCH1, C14ORF169, GDF10, ID3, AXIN2, LRP5, TWIST1, IGFBP5
	GO:0007219	Notch signaling pathway	6	2.55847	NOV, PTH1R, MUSTN1, NFIB		GO:0009725	response to hormone	8	1.70346	RERG, SNRPN, NCOA6, H3F3A, H3F3B, UQCRFS1, ACAT1, SRF
	GO:0030308	negative regulation of cell growth	6	2.46332	LIMS2, FERMT2, FLNC		GO:0071230	cellular response to amino acid stimulus	8	1.45983	COL4A1, ASS1, XBP1, RRAGA, PDGFC, COL16A1, SESN1, COL5A2
	GO:0001558	regulation of cell growth	5	2.34814	NOV, WISP2, FBLN5, WFDC1, IGFBP5		GO:0009408	response to heat	8	1.41605	HSP90AA1, HSPA2, IGFBP7, DNAJA1, TGFB1I1, SOD1, EIF2B2, EIF2B5
	GO:0048041	focal adhesion assembly	4	2.99578	ACTN1, CSRP1, MYL9, VCL		GO:0048812	neuron projection morphogenesis	8	1.41605	NTF3, MAP1S, PLXNB1, ITGA1, GJA1, DYNLT1, UBB, NGF
	GO:0008016	regulation of heart contraction	4	2.66776	HSPA2, HSPB7, HSPB2, SERPINH1		GO:0006465	signal peptide processing	7	2.29382	IMMP2L, F10, SEC11C, SPCS1, PROS1, PCSK5, GAS6
	GO:0002062	chondrocyte differentiation	4	2.38066	SMOC2, LAMA5, FBLN5, ITGA8, ITGA1, COL6A1, COL4A5		GO:0043001	Golgi to plasma membrane protein transport	7	2.12014	BBS1, RAB31, GOLPH3, RAB34, VAMP5, VAMP3, OPTN
	GO:0070527	platelet aggregation	4	2.31906	NOV, LAMA5, CSPG4, ANGPT1, MFGE8, RAMP1, MEIS1		GO:0010033	response to organic substance	7	2.04005	PPP2R1A, CRIP1, SERPINF2, TIMP4, KCNA5, SOD1, ANXA5
	GO:0006986	response to unfolded protein	4	2.28951	FBLN5, ANGPT1, VCL		GO:0007163	establishment or maintenance of cell polarity	7	1.96398	ACTR3, ACTR2, CAP2, SPINT2, FAT1, CLASP1, PARVA
	GO:0006813	potassium ion transport	4	1.50646	WISP2, SORBS1, LPP, MPDZ, ITGA8, COL6A1, MFGE8, TGFB1I1, CX3CL1, VCL		GO:0006754	ATP biosynthetic process	7	1.96398	ATP5F1, ATP5C1, ATP5L, ATP5O, SURF1, ATP5H, ATP5J
	GO:0030336	negative regulation of cell migration	4	1.34602	CSPG4, FOXC1, SDC4		GO:0036258	multivesicular body assembly	7	1.82274	CHMP4C, TSG101, SNF8, VPS4B, RAB11A, VPS36, VPS25
	GO:0007229	integrin-mediated signaling pathway	4	1.30199	SLC24A3, KCNA5, AQP1, KCNMB1		GO:0061024	membrane organization	7	1.75705	YWHAH, SGCD, GNPAT, SGCE, RAB13, SGCA, SGCB
	GO:0014031	mesenchymal cell development	3	3.16819	NOTCH3, AEBP1, PCGF2, WFS1, HEYL, HEY2, LMCD1, NFIX, ID4, ZBTB16, KANK2, NFIB		GO:0072593	reactive oxygen species metabolic process	7	1.5771	NOX4, PRDX4, BNIP3, SOD1, SESN1, NDUFAF2, DDIT4
	GO:0034329	cell junction assembly	3	2.36528	DES, TPM2, TMOD1		GO:0010811	positive regulation of cell-substrate adhesion	7	1.41925	SMOC2, RSU1, ITGA5, ECM2, COL8A1, ABI3BP, EMILIN1
	GO:0034394	protein localization to cell surface	3	1.84485	SPRY1, FOXC1, SDC4		GO:0032720	negative regulation of tumor necrosis factor production	7	1.41925	TSPO, AXL, AKAP8, LBP, GAS6, GSTP1, TWIST1
	GO:0030203	glycosaminoglycan metabolic process	3	1.61639	LAMA5, ITGA8, FERMT2		GO:0018279	protein N-linked glycosylation via asparagine	7	1.32444	OSTC, VCP, DPM1, DAD1, RPN1, UBE2J1, ALG5
	GO:0030049	muscle filament sliding	3	1.399	ACTG2, ACTA2		GO:0045184	establishment of protein localization	7	1.32444	DERL1, VCP, ITGA8, RDX, KPNB1, WBP2, PLEKHA1
	GO:0001657	ureteric bud development	3	1.399	RRAS, CX3CL1, IGFBP5, VCL		GO:0008654	phospholipid biosynthetic process	7	1.32444	CRLS1, PGS1, LPCAT1, FADS1, HEXB, GPAM, LPCAT3
	GO:0034446	substrate adhesion-dependent cell spreading	3	1.399	RERG, SPRY1, PTH1R, ITGA1, TGFB1I1, ZBTB16, LDOC1, KANK2		GO:0048011	neurotrophin TRK receptor signaling pathway	6	2.51582	NDN, BCAR1, RAF1, NGF, DDIT4, PTPN11
	GO:0090131	mesenchyme migration	2	1.3872	AQP1, ERRFI1		GO:1901216	positive regulation of neuron death	6	2.38876	AIMP2, EIF2S1, CLU, ELK1, PARP1, DDIT4
	GO:0071474	cellular hyperosmotic response	2	1.30981	LAMA5, ITGA8, FERMT2, ITGA1		GO:0010881	regulation of cardiac muscle contraction by regulation of the release of sequestered calcium ion	6	2.16307	PLN, ATP1A2, GSTO1, HRC, CALM2, CALM1
	turquoise						GO:0015986	ATP synthesis coupled proton transport	6	1.88009	ATP5F1, ATP5C1, ATP5L, ATP5O, ATP5H, ATP5J
	GO:0007186	G-protein coupled receptor signaling pathway	90	2.03867	CGB1, GNA15, BCAR1, CGB2, OR11A1, CXCR1, TAS1R3, OR8S1, VIPR2, TAS1R2, CXCL10, GNG8, AKR1C3, S1PR2, TAAR9, AKR1C2, TAAR6, OR9A4, VN1R2, HTR1A, OR2T10, CCL3L1, APOE, MRGPRX1, TAS2R9, GNG5, OR7A10, OR2S2, CCKBR, GPR171, ADIPOR2, PROKR2, GPR132, MRGPRX4, GRM4, PROK2, CCR8, CCR5, OR4K14, MC2R, OR2D2, OR4N2, GPR17, CCL1, CXCL1, CCL3, OR1C1, CXCL5, PF4, TSHB, ABCA1, OR5A1, GPRC5B, CCL4, GPRC5A, OR13C5,…		GO:0000715	nucleotide-excision repair, DNA damage recognition	6	1.79755	COPS5, COPS4, COPS7A, UBB, PARP1, RBX1
	GO:0006954	inflammatory response	64	8.23148	S100A8, LY86, IL18, CRP, CXCR1, PRDX5, NFKB2, TLR7, MMP25, CXCL10, CCL3L1, SEMA7A, AOAH, ADAM8, C5AR1, LTBR, IL18RAP, C4A, RELB, POLB, IFI16, IL24, GAL, NLRP2, PROK2, SDC1, CCR5, NFE2L1, NFE2L2, AOC3, CCL1, CXCL1, TPST1, CCL3, NMI, CXCL5, ITGB2, PF4, BDKRB1, CCL4, TNFRSF4, SLC11A1, CCL20, ZC3H12A, PTX3, SPP1, HAVCR2, PLP1, OLR1, HCK, SPHK1, CHI3L1, ANXA1, PTGFR, ECM1, CCL18, S100A12, CCL11, STAB1…		GO:0030866	cortical actin cytoskeleton organization	6	1.71996	TLN1, ROCK1, RHOQ, PRKCDBP, RAB13, EHD2
	GO:0055114	oxidation-reduction process	62	1.8677	OXA1L, HTATIP2, CYB5R2, CYP2J2, CYP2C18, SNCA, PRDX5, PRDX1, AKR1C3, AKR1C2, CREG2, SPR, LOXL4, LOXL2, SARDH, AKR1C1, HPD, NQO2, HHIPL1, NCF2, MICAL3, QDPR, GMPR, ECSIT, NDUFA10, MOXD1, CYP27A1, PRDX6, UQCRH, TXNDC8, STEAP2, KDM6B, AOC3, PYCRL, ME2, CYP2B6, HSD3B7, TXN2, TH, IFI30, ADH7, ALDH1A3, DHODH, PNPO, GSTO1, SCO2, NOX3, TBXAS1, NOS1, FDXR, IDO2, STAB2, DBH, CYP4B1, SOD2, STAB1, HSDL2, DIO…		GO:0030206	chondroitin sulfate biosynthetic process	6	1.64686	XYLT2, CHSY3, CHPF, CSPG4, CHST3, VCAN
	GO:0006955	immune response	51	2.77464	CHIA, AQP9, IL18, PGLYRP1, CXCL10, CFP, HAMP, IL4R, SEMA7A, FCGR3A, FCGR3B, IK, LTBR, IL18RAP, C5AR1, PRG2, IL24, CCR8, C8B, CCR5, CST7, DEFA1, TNFSF12-TNFSF13, CXCL1, CSF3, C7, CCL3, CXCL5, PF4, CD70, TNFRSF4, CCL4, CD74, LIF, SLC11A1, CCL20, PRKRA, CD22, IL2RG, IL3, TCF7, KIR2DS5, TINAGL1, VAV1, CCL18, CCL11, PRELID1, ILF2, IKBKG, CMA1, IFI6		GO:0005977	glycogen metabolic process	6	1.39228	PPP1CA, PPP1R3C, PPP1R2, STK40, PPP1R1A, PPP1CB
	GO:0007155	cell adhesion	50	1.85085	BCAR1, GP9, TGFBI, CSF3R, LOXL2, BOC, ICAM1, ICAM5, SIRPA, CTNNA3, HES1, CCR8, CD34, HAS1, COL1A1, EMP2, PARVA, AOC3, ITGAE, ITGB4, NINJ2, ITGB2, PCDHB11, CDH3, CCL4, PXN, SIGLEC9, PCDHAC1, ITGAX, COMP, TNR, COL6A2, CD22, GPNMB, SPP1, MAG, OLR1, HCK, STAB2, SLAMF7, EMILIN2, TINAGL1, EMILIN1, CCL11, CD300A, STAB1, ITGA7, PECAM1, CFDP1, SELE		GO:0048008	platelet-derived growth factor receptor signaling pathway	6	1.39228	BCAR1, PDGFRA, PDGFRB, PDGFC, PLEKHA1, PTPN11
	GO:0043066	negative regulation of apoptotic process	49	1.74383	HTATIP2, ARNT2, SNCA, FOXO1, PRDX5, PDCD1, SETX, CITED2, GATA1, GATA6, CHST11, LTF, DDAH2, TWIST2, MT3, SOX10, RARG, FLNA, PROC, PLAUR, PRAMEF12, PROK2, MSX1, THOC6, CLEC5A, SOX8, CD74, TIMP1, COMP, NPM1, PRAMEF1, BCL3, ANGPTL4, ACTC1, MPZ, FLT4, HCK, SPHK1, ANXA1, NCKAP1L, PTGFR, TAX1BP1, SOD2, PPIF, PRELID1, CDKN1A, PLK3, UCP2, FABP1		GO:0001937	negative regulation of endothelial cell proliferation	6	1.39228	CAV1, ACVRL1, TNMD, GJA1, ATOH8, NR2F2
	GO:0006508	proteolysis	49	1.13995	ADAMTS17, FOLH1B, PGC, LGMN, RNPEPL1, MMP7, ANPEP, CTSA, MMP3, MMP2, MMP1, MMP25, ZFYVE9, FCN1, PRSS3, LTF, FGL2, ZMPSTE24, HTRA3, PGA5, ADAM8, KLK14, ADAM11, PEPD, CPA6, OLR1, C4A, CLCA4, AGBL4, ELANE, SCRN1, TMPRSS9, COLEC10, MMP14, TMPRSS5, MMP13, PROC, CAPN1, MMP11, GZMM, C1QA, CTSO, DLD, ST14, LTA4H, ADAM18, MPND, PMPCA, ADAMTS4		GO:0030203	glycosaminoglycan metabolic process	6	1.39228	GPC4, CSPG4, VCAN, FOXC1, SDC4, GPC1
	GO:0030154	cell differentiation	47	1.31933	SPATA20, HTATIP2, ONECUT1, CCDC85B, PGF, SLC2A14, ANPEP, GPM6B, CSPG5, MYBL2, ZIC1, SLC7A5, CITED2, SHB, OSR2, PBXIP1, ZC3H12A, NDRG2, ODF1, ATOH8, ATOH7, TWIST2, ANGPTL4, INA, ZBTB7A, HCK, EDAR, PPDPF, DDX4, FOXN3, SFRP5, CLPTM1, CXCL17, SH2D2A, INHBA, HHEX, CHRDL2, TEX15, GADD45G, AAMP, JAK1, TNK1, RBM38, ADAM18, TNFSF12-TNFSF13, GGNBP2, TNFAIP2		GO:0042572	retinol metabolic process	6	1.33665	AKR1C3, RDH10, DHRS3, DHRS4, RDH14, RDH5
	GO:0008284	positive regulation of cell proliferation	47	1.26977	CSF3, AVPR2, CXCL5, PGF, PDGFA, EDN2, ARNT2, CRLF1, TIMP1, CXCL10, LIF, AKR1C3, S1PR2, AKR1C2, HTR1A, OSR2, REG1A, HPSE2, BLOC1S2, PRAMEF1, NPM1, FOSL1, SERTAD1, IL3, RARG, CCKBR, HCK, CAMP, FLT4, IGF2, IL24, ISL1, PTGFR, RPS4X, PROX1, CAPN1, HES1, HOXC10, PROK2, PRAMEF12, CRKL, ATF3, SLC25A33, FABP1, AREG, EMP2, MAB21L2		GO:0071773	cellular response to BMP stimulus	6	1.33665	ACVRL1, SPINT2, HEYL, TNMD, BMPR2, ACVR1
	GO:0045087	innate immune response	46	1.61394	S100A8, C6, LY86, CLU, DEFB104A, PGLYRP1, IFNW1, LY9, NFKB2, TLR7, MARCO, IFNA5, PGLYRP2, FCER1G, LBP, PTX3, MX1, MX2, TYROBP, HAVCR2, C4A, NCF2, KIR2DS5, CAMP, RELB, TRIM28, ANXA1, HERC5, IFI16, ECSIT, NLRP2, S100A12, LCN2, C1QA, GZMM, CHGA, NPY, IKBKG, DEFA4, DEFA3, JAK1, DEFA1, TNK1, TREM1, CD300LB, CLEC5A		GO:0055003	cardiac myofibril assembly	5	2.20213	ACTC1, PDGFRA, PDGFRB, SRF, MYH10
	GO:0007267	cell-cell signaling	35	2.90406	CGB1, LALBA, CCL3, PPY, CXCL5, PDGFA, PGF, IL18, EFNA2, EFNA3, CGB2, CD70, ITGB2, TSHB, CCL4, VIPR2, CXCL10, GATA1, CCL20, AGT, GATA4, TMED1, GPR101, ADRA2C, SEMA3B, IL3, IK, CCL18, C1QA, INHBA, CCR5, STAB1, AREG, GDF15, SST		GO:1903543	positive regulation of exosomal secretion	5	1.83109	RAB7A, TSG101, SNF8, VPS4B, SDC4
	GO:0042493	response to drug	32	1.14868	XPO1, PGF, TXN2, SNCA, CDH1, TIMP4, ABCA1, CDH3, APOA2, PLIN2, GATA6, GATA4, DHODH, RAB6C, FOSL1, TXNIP, ICAM1, ACTC1, TRPA1, ANXA1, NCKAP1L, NDUFA10, GAL, SOD2, LCN2, ABCG8, INHBA, CDKN1A, COL1A1, PARP4, SST, MGST1		GO:0003203	endocardial cushion morphogenesis	5	1.72919	NOTCH1, ACVRL1, HEYL, ACVR1, TWIST1
	GO:0032496	response to lipopolysaccharide	31	5.0802	ALPL, CXCL1, OTUD5, S100A8, CXCL5, TH, SNCA, ADH5, MAPKAPK3, ACP5, CNP, BDKRB1, PF4, TIMP4, NFKB2, TNFRSF4, CXCL10, SLC11A1, CSF2RB, LBP, LTBR, C5AR1, ELANE, SPARC, PTGFR, SOD2, PCK1, IFNAR1, SELE, MGST1, MGST2		GO:0006940	regulation of smooth muscle contraction	5	1.72919	CAV1, PLCE1, CNN1, ATP1A2, DAPK3
	GO:0001525	angiogenesis	30	2.37954	HTATIP2, PDGFA, PGF, ATP5B, IL18, HOXB13, ANPEP, MMP2, SHB, OVOL2, HAND1, HOXA7, TGFBI, ZC3H12A, RAPGEF3, SOX17, PLXND1, ADAM8, ANGPTL4, STAB2, MMP14, ECM1, CXCL17, PROK2, SH2D2A, PECAM1, AAMP, TNFSF12-TNFSF13, TNFAIP2, SEMA4A		GO:0048514	blood vessel morphogenesis	5	1.63566	COL4A1, SERPINF2, GJA1, CDH2, NR2F2
	GO:0007268	chemical synaptic transmission	28	1.48791	CPLX1, SNAP91, TACR2, CNP, PCDHB11, HCRTR1, PLCB3, HTR1A, NPTX2, LRFN2, SLC12A7, PLP1, MPZ, SCN2B, SYT10, CPNE6, GABRA5, OR11H4, DBH, OR10H3, GRM4, GRM3, NPY, GRIA2, SLC6A5, CACNA1E, SPG11, SST		GO:0009083	branched-chain amino acid catabolic process	5	1.46962	HSD17B10, DLD, HIBCH, ACAT1, HIBADH
	GO:0030198	extracellular matrix organization	27	2.30423	ICAM1, ICAM5, PDGFA, ITGAE, C6ORF15, ITGB4, CDH1, ITGB2, NFKB2, SPARC, SPINK5, EMILIN1, COL9A2, BGN, ITGAX, HPSE2, TNR, COMP, ITGA7, PECAM1, TGFBI, COL6A2, BCL3, COL1A1, VWA1, MFAP5, SPP1		GO:0022904	respiratory electron transport chain	5	1.39549	NDUFA5, SDHB, IMMP2L, NDUFAF2, ETFA
	GO:0006898	receptor-mediated endocytosis	24	1.75683	MRC1, HHIPL1, OLR1, TFR2, RABEPK, HP, HBA2, STAB2, SPARC, TINAGL1, TMPRSS5, MARCO, LRP1, CD207, HPX, STAB1, APOE, CXCL16, LOXL4, SCARB1, LOXL2, LRP3, CD5, HBB		GO:0006123	mitochondrial electron transport, cytochrome c to oxygen	5	1.39549	COX7B, COX6B1, COX6A1, COX5A, COX5B
	GO:0006935	chemotaxis	23	3.79886	CCL1, CXCL1, CCL3, CMTM2, C5AR1, CXCL5, CXCR1, NCKAP1L, CCL18, CXCL10, PLAUR, CCL11, LSP1, CXCL17, PROK2, CCR8, DOCK2, CCR5, CCL20, CXCL16, DEFA1, FOSL1, CMTM5		GO:0071480	cellular response to gamma radiation	5	1.32643	NOX4, TMEM109, CRYAB, ELK1, YAP1
	GO:0070374	positive regulation of ERK1 and ERK2 cascade	22	1.52165	HAVCR2, CCL1, ICAM1, CCL3, C5AR1, PDGFA, ATP6AP1, FLT4, CHI3L1, CCL4, CD74, CCL18, CCL11, HCRTR1, CCL20, CCL3L1, SERPINF2, SEMA7A, GPNMB, XCL2, MT3, NQO2		GO:0090131	mesenchyme migration	4	2.57537	ACTG2, ACTC1, ACTA1, ACTA2
	GO:0007596	blood coagulation	22	1.32053	F10, NFE2, SERPINA10, VPS45, AK3, PLAUR, CBX5, GP9, PROC, GATA1, P2RX1, GATA6, IFNA5, SERPINA5, GATA4, FCER1G, HBG1, COL1A1, HBG2, PROS1, HBB, HBD		GO:0090382	phagosome maturation	4	2.29637	RAB32, RAB7A, RAB31, RAB34
	GO:0050900	leukocyte migration	21	2.9609	GLG1, ICAM1, MAG, C5AR1, OLR1, ITGB2, DBH, SIRPA, SLC7A5, CD74, MMP1, PROC, NRAS, ITGAX, CD34, PECAM1, FCER1G, COL1A1, TREM1, SELE, PROS1		GO:0061298	retina vasculature development in camera-type eye	4	2.07529	ACVRL1, BMPR2, PDGFRA, PDGFRB
	GO:0071356	cellular response to tumor necrosis factor	20	3.12235	ZFP36, CCL1, ICAM1, GPD1, CCL3, CAMP, CHI3L1, CCL4, CCL18, PCK1, LCN2, CCL11, CCL20, CCL3L1, HAMP, PRPF8, ZC3H12A, COL1A1, NFE2L2, XCL2		GO:1901844	regulation of cell communication by electrical coupling involved in cardiac conduction	4	1.89303	CAV1, HRC, CALM2, CALM1
	GO:0007568	aging	20	1.2715	LITAF, SNCA, MMP7, POLB, CNP, ITGB2, NFKB2, TIMP1, PCK1, CDKN1C, RETN, LRP1, UCP2, HAMP, AGT, KRT14, DLD, NFE2L2, LOXL2, EIF2B5		GO:0034101	erythrocyte homeostasis	4	1.73873	RPS17, AXL, PRDX1, RPS24
	GO:0071222	cellular response to lipopolysaccharide	19	2.5802	ZFP36, HAVCR2, MRC1, CSF3, ICAM1, SBNO2, LITAF, CAMP, IL24, ABCA1, CXCL10, LCN2, CCR5, CCL20, HAMP, PRPF8, CXCL16, ZC3H12A, LBP		GO:0045047	protein targeting to ER	4	1.73873	SRP68, SPCS1, PMM1, SEC61A1
	GO:0045766	positive regulation of angiogenesis	19	2.49531	C5AR1, PGF, CAMP, C6, SPHK1, CHI3L1, ITGB2, ISL1, ECM1, CCL11, GATA6, CD34, GATA4, ZC3H12A, CMA1, RAPGEF3, NFE2L2, TNFSF12-TNFSF13, ANGPTL4		GO:0060674	placenta blood vessel development	4	1.60553	MAP2K1, PKD2, PKD1, NR2F2
	GO:0042742	defense response to bacterium	19	1.49927	LALBA, S100A8, CAMP, ELANE, PRG2, DEFB104A, HP, STAB2, VGF, S100A12, CFP, SLC11A1, ISG15, CCL20, STAB1, HAMP, DEFA3, BCL3, FCER1G		GO:0008347	glial cell migration	4	1.60553	TSPO, NDN, CSPG4, VCAN
	GO:0051607	defense response to virus	19	1.0517	AGBL4, HERC5, IFNW1, IFI16, TLR7, CXCL10, IFNAR1, STAT2, IFIT2, UNC13D, ITGAX, ISG15, CD207, IFNA5, DEFA3, ZC3H12A, DEFA1, MX1, MX2		GO:0090161	Golgi ribbon formation	4	1.48885	TMED5, GOLPH3, OPTN, GOLGA2
	GO:0030593	neutrophil chemotaxis	18	5.10912	CCL1, CCL3, C5AR1, S100A8, EDN2, NCKAP1L, ITGB2, VAV1, CCL4, CCL18, S100A12, CCL11, CCL20, CCL3L1, FCER1G, CSF3R, TREM1, XCL2		GO:0003181	atrioventricular valve morphogenesis	4	1.48885	NOTCH1, HEYL, BMPR2, ACVR1
	GO:0002576	platelet degranulation	18	2.63395	TF, PHACTR2, ACTN4, PDGFA, PSAP, CLU, IGF2, PF4, SPARC, ECM1, FLNA, TIMP1, SERPINF2, PECAM1, TMSB4X, ITIH3, PROS1, CALM2		GO:0060315	negative regulation of ryanodine-sensitive calcium-release channel activity	4	1.38545	PKD2, GSTO1, CALM2, CALM1
	GO:0009615	response to virus	17	1.97396	BATF3, CLU, IFNW1, CCL4, IFNAR1, LCN2, CCL11, IFIT2, PRKRA, IKBKG, BCL3, MX1, FOSL1, MX2, IFNGR2, DCLK1, ENO1		GO:0000052	citrulline metabolic process	3	1.89625	ASS1, DDAH2, DDAH1
	GO:0030308	negative regulation of cell growth	17	1.60861	CCDC85B, ADIPOR2, FBP1, TRIM40, BDKRB1, SESN2, INHBA, CDKN1A, MSX1, AGT, TNK1, SOX17, NDUFS3, SERTAD1, NPPA, MT3, ENO1		GO:0043328	protein targeting to vacuole involved in ubiquitin-dependent protein catabolic process via the multivesicular body sorting pathway	3	1.61478	SNF8, VPS36, VPS25
	GO:0070098	chemokine-mediated signaling pathway	16	3.52809	CXCL1, CCL1, CCL3, CXCL5, CXCR1, PF4, CCL4, CCL18, CXCL10, CCL11, CCR8, CCR5, CCL20, CCL3L1, GPR17, XCL2		GO:0008356	asymmetric cell division	3	1.61478	ACTR3, ACTR2, GOLGA2
	GO:0022617	extracellular matrix disassembly	16	3.19475	ELANE, MMP7, CDH1, MMP3, MMP14, MMP2, MMP13, MMP1, MMP11, CAPN1, TIMP1, CAPG, CMA1, ADAM8, SPP1, ADAMTS4		GO:1990182	exosomal secretion	3	1.61478	COPS5, TSG101, RAB11A
	GO:0019221	cytokine-mediated signaling pathway	16	1.08338	ASPN, CSF3, FLRT2, IL3, HCK, EDN2, SOCS1, IFNW1, PF4, NUMBL, BGN, IFNA5, CSF3R, RTN4RL2, IL1RAPL2, IL13RA2		GO:0031508	pericentric heterochromatin assembly	3	1.61478	CENPV, H3F3A, H3F3B
	GO:0043524	negative regulation of neuron apoptotic process	16	1.06156	NES, C5AR1, LGMN, CRLF1, SNCA, AARS, GABRA5, ISL1, PIN1, SOD2, LRP1, APOE, ADAM8, NEFL, CACNA1A, MT3		GO:0015853	adenine transport	3	1.61478	SLC25A4, SLC25A5, VDAC3
	GO:0001523	retinoid metabolic process	15	3.72778	RBP4, OPN1MW, ADH5, APOC2, ADH7, SDC3, AKR1C3, CLPS, APOA2, SDC1, LRP1, APOE, STRA6, GPC1, AKR1C1		GO:0019673	GDP-mannose metabolic process	3	1.61478	GMDS, DPM1, GUK1
	GO:0001649	osteoblast differentiation	15	1.52646	ALPL, CCL3, ATP5B, MRC2, SNAI1, SOX8, PSMC2, SEMA7A, HSPE1, SP7, COL1A1, TMEM119, GPNMB, TP53INP2, SPP1		GO:0051653	spindle localization	3	1.41239	ACTR3, ACTR2, WASL
	GO:0044267	cellular protein metabolic process	15	1.13898	SNCA, IGF2, SFTPA1, MMP2, MMP13, MMP1, GATA6, TGFBI, CSF2RB, LTF, PGA5, HIST1H4I, GGA2, IGFBP4, NPPA		GO:0014031	mesenchymal cell development	3	1.41239	NOTCH1, HEYL, FOXC1
	GO:0021762	substantia nigra development	14	4.1902	INA, MAG, PLP1, ZNF430, ATP5F1, CNP, YWHAE, CKB, DYNLL1, RHOA, NDRG2, NDUFS3, CALM2, ATP5J		turquoise
	GO:0007586	digestion	14	3.03111	PPY, CHIA, CCKBR, SULT2A1, PGC, AKR1C2, CLPS, NPY, PRSS3, PGA5, SST, GKN1, AKR1C1, NMU		GO:0007165	signal transduction	78	8.6574	SORL1, TLR1, IQGAP2, RANGAP1, CD53, RASSF7, CD48, ARHGAP4, ARHGAP22, LILRA2, LILRA3, IL4R, CSF3R, RALA, IL1B, ARHGAP9, PILRA, C5AR1, LYN, MPP1, PIK3CD, PRKCH, STK4, M6PR, PRKCD, DAPK1, PLAUR, ARHGAP30, LILRB2, CD83, NPC1, TNFSF13B, GRN, CD33, RIPK3, RIPK2, CLEC5A, TNFRSF21, ITGAL, CCL2, LITAF, HLA-DRB3, MAPKAPK3, CXCL9, FPR1, CCL8, MYO9B, FPR3, CD72, IL7R, APBB1IP, CD74, LPXN, CCL20, RAC2, IL10RB…
	GO:0071347	cellular response to interleukin-1	14	2.53742	CCL1, ICAM1, CCL3, CAMP, CHI3L1, CCL4, CCL18, PCK1, CCL11, LCN2, CCL20, CCL3L1, ZC3H12A, XCL2		GO:0006955	immune response	65	24.5477	IL27RA, AQP9, CD8A, TLR1, TLR4, HLA-DMB, HLA-DMA, C1QC, HAMP, LTB4R, IL4R, IL1B, C5AR1, IL18RAP, PTGER4, GZMA, NCF4, TNFRSF14, HLA-B, CTSS, GZMH, WAS, HLA-DQA1, HLA-F, IGSF6, LILRB2, CD36, TNFSF13B, CTSC, HLA-DPA1, SEMA4D, PTAFR, HLA-DRA, TNFRSF21, CCL3, CCL2, CCR1, HLA-DRB3, MAP4K2, CXCL9, GPR65, OAS3, CCL8, IL7R, CCL5, CD74, SLC11A1, TNFRSF1B, CCL20, IL10RB, FCGR1A, HLA-DRB4, CD4, HLA-DPB1, HLA…
	GO:0050729	positive regulation of inflammatory response	14	2.42823	CCL1, CCL3, S100A8, IL18, GPRC5B, TLR7, CCL4, CCL18, S100A12, CCL11, CCL3L1, MAPK13, AGT, XCL2		GO:0006954	inflammatory response	58	21.6312	AIF1, LY86, TLR1, TLR4, TLR5, TLR7, CXCR4, CCL3L1, LTB4R, AOAH, IL1B, ADAM8, SYK, PIK3CG, C5AR1, IL18RAP, GBP5, LYN, LY96, PIK3CD, LYZ, TNFRSF14, RIPK2, TNFAIP3, PTAFR, TNFRSF21, HMGB1, ITGAL, C3AR1, CCL3, CCL2, CCR1, FPR1, CXCL9, CCL8, ITGB2, FPR3, CCL5, SLC11A1, TNFRSF1B, FOLR2, CCL20, IL10RB, PSTPIP1, SPP1, CSF1R, HAVCR2, LIPA, OLR1, HCK, LGALS9, CCL18, CYBA, P2RX7, CYBB, PARP4, PLA2G4C, CD14
	GO:0043085	positive regulation of catalytic activity	14	2.03858	CXCL1, PSAP, DBF4, APOC1, IGF2, CTSA, APOA2, CLPS, B3GAT3, ALOX5AP, PRKRA, NPM1, MT3, MGST2		GO:0045087	innate immune response	48	12.3825	HMGB1, IFIH1, FGR, LY86, TLR1, MAP4K2, TLR4, TLR5, FES, C1QC, TLR7, BTK, MARCO, NOD2, PSTPIP1, CLEC4A, FCER1G, C2, CSK, CD6, MX2, TYROBP, CSF1R, SYK, HAVCR2, PIK3CG, CARD9, BST2, LYN, NCF2, LY96, CAMP, PIK3CD, CNPY3, SLAMF6, HLA-B, TYK2, CD84, C1QA, CYBA, C1QB, CYBB, CORO1A, RIPK2, TREM1, TREM2, CLEC5A, CD14
	GO:0050830	defense response to Gram-positive bacterium	14	1.86846	HAVCR2, LALBA, C5AR1, CAMP, CRP, PGLYRP1, ACP5, CHGA, NPY, PGLYRP2, DEFA4, DEFA3, DEFA1, LBP		GO:0043547	positive regulation of GTPase activity	38	4.2719	CCL3, CCL2, CYTH1, GRB2, PREX1, CCL8, RANGAP1, MYO9B, DENND2D, CCL5, ARHGAP4, ARHGAP22, DOCK2, SMAP2, GMIP, CCL20, RASGRP3, CCL3L1, RASAL3, CSF2RA, FGD3, ARHGAP9, ICAM1, ARHGEF3, RGS19, PSD4, NCKAP1L, S100A10, DOCK8, VAV1, CCL18, ARHGAP30, RGS1, ADAP2, ACAP1, SH3BGRL3, SEMA4D, SH3BP1
	GO:0007229	integrin-mediated signaling pathway	14	1.37617	ADAM11, PLP1, BCAR1, HCK, ITGAE, ITGB4, ITGB2, VAV1, ITGAX, SEMA7A, ITGA7, FCER1G, ADAM8, TYROBP		GO:0006915	apoptotic process	37	3.89549	IER3, TNFRSF21, LITAF, CADM1, LY86, SNCA, GPR65, ITGB2, RASSF7, DAB2, CXCR4, BOK, MAP3K1, CD2, IL1B, INPP5D, XAF1, CIB1, C5AR1, GZMA, PIM1, GZMH, STAT1, PRKCD, STK4, DAPK1, EPB41L3, ALOX15B, CLIC4, IRF1, RIPK2, CTSC, TNFAIP3, ZNF385A, DRAM1, CD14, TP53INP1
	GO:0045471	response to ethanol	14	1.20556	CSF3, ICAM1, RBP4, ACTC1, TBXAS1, S100A8, TH, POLB, ADH7, SPARC, RPS4X, ADIPOQ, PSMD14, HAMP		GO:0007155	cell adhesion	34	4.65468	ITGAL, CCL2, CCR1, NINJ1, ITGB2, CD72, SIGLEC9, ITGAM, VCAM1, LPXN, SORBS1, ITGAX, ITGB7, CLEC4A, PSTPIP1, CD2, CSF3R, CD4, GPNMB, SPP1, CIB1, PARVG, ICAM1, OLR1, HCK, SIGLEC10, TINAGL1, EMILIN2, SIRPA, CD36, CD300A, CD33, COL1A1, SEMA4D
	GO:0098869	cellular oxidant detoxification	13	2.1463	PRDX5, HBA2, HP, SESN2, APOE, PRDX6, TXNDC8, CYGB, FABP1, GSTO1, HBB, MGST1, MGST2		GO:0035556	intracellular signal transduction	31	4.56027	STYXL1, ADCY7, PREX1, MAP4K2, MAP4K1, MYO9B, BTK, NOD2, GMIP, MC1R, HMOX1, SH2B3, INPP5D, PLCB2, DEDD2, TYROBP, SYK, FYB, ARHGEF3, HCLS1, PRKCH, PRKCD, STK4, DAPK1, TYK2, TNS3, MAPK13, PLCG2, TGFBR3, TREM1, PLA2G4C
	GO:0030216	keratinocyte differentiation	13	1.86654	TXNIP, LCE3B, LCE3C, ANXA1, FOXN1, LCE2A, KRT10, LCE1A, AKR1C3, SPRR2A, SPRR1B, ST14, POU3F1		GO:0050776	regulation of immune response	30	12.0629	ITGAL, MICB, CD8A, CD247, ITGB2, SIGLEC9, VCAM1, FCGR1A, ITGB7, OSCAR, TYROBP, ICAM1, CD3D, LAIR2, SLAMF6, SPPL2A, CD300C, HLA-B, HCST, HLA-F, LILRB2, FCGR2B, CD300A, CD33, IRF1, COL1A2, CD300LF, COL1A1, TREM1, TREM2
	GO:0045454	cell redox homeostasis	13	1.82371	NOS1, NCF2, TXN2, CAMP, PRDX5, PRDX1, SLC11A1, TXNDC8, PRDX6, DLD, LTF, NFE2L2, SCO2		GO:0006468	protein phosphorylation	30	3.259	CCL2, FGR, STK10, MMD, MAP4K2, MAP4K1, CCL8, FES, BTK, MAP3K1, CSK, SYK, PIK3CG, FYB, LYN, HCK, PIK3CD, PIM1, PRKCH, PRKCD, STK4, HCST, DAPK1, TYK2, P2RX7, CSNK1D, GMFG, MERTK, MYLK, MAP3K11
	GO:0008584	male gonad development	13	1.22826	UTF1, ZFP42, MMP14, SOX8, CITED2, GATA1, AKR1C3, INHBA, NUPR1, GATA6, BOK, GATA4, BIK		GO:0006508	proteolysis	30	2.64419	CNDP2, LGMN, MMP9, MMP7, CTSA, ANPEP, C1QC, MMP1, TPP1, C2, ADAM8, DPEP2, RHBDF2, NRIP3, OLR1, CTSS, MMP12, MMP11, C1QA, C1QB, GZMK, ST14, CTSD, ADAMTS1, CTSC, LTA4H, CTSB, PLAU, ADAMDEC1, GCA
	GO:0034097	response to cytokine	12	2.73853	AVPR2, IFI27, CXCL16, RELB, PPP3CB, MAPKAPK3, ACP5, TIMP4, NFKB2, SPARC, FOSL1, TIMP1		GO:0007166	cell surface receptor signaling pathway	29	6.96418	CCL2, IL27RA, CD8A, CCR1, CD247, MAPKAPK3, TSPAN8, CD53, IL7R, SIGLEC9, MARCO, TSPAN33, CLEC4A, CD2, CD4, CD28, IL18RAP, CD3D, LY96, TNFRSF14, IGSF6, LILRB2, P2RX7, CD37, CD36, LILRB3, CD82, MERTK, CD14
	GO:0030574	collagen catabolic process	12	2.01793	PEPD, MRC2, COL6A2, MMP7, COL1A1, MMP14, MMP3, ADAMTS2, MMP13, MMP2, MMP1, MMP11		GO:0050900	leukocyte migration	26	12.8011	C3AR1, ITGAL, GRB2, MMP9, FPR1, ITGB2, FPR3, ITGAM, MMP1, CD74, CD48, ITGAX, CD2, FCER1G, INPP5D, ICAM1, C5AR1, OLR1, LYN, SIRPA, SLC16A3, CD84, COL1A2, TREM1, COL1A1, MERTK
	GO:0035690	cellular response to drug	12	1.78115	DDC, ADSSL1, PDE4A, TH, PPP3CB, QDPR, FBP1, NFE2L2, ADIPOQ, CCL4, MT3, EIF2B5		GO:0006935	chemotaxis	25	11.905	C3AR1, CCL3, CCL2, C5AR1, RNASE2, CCR1, FPR1, CXCL9, CCL8, NCKAP1L, CCL5, FES, CCL18, LGALS9, PLAUR, DOCK2, RAC2, CCL20, CXCR4, CXCL16, RALA, CMTM7, PLAU, CMTM6, PTAFR
	GO:0048010	vascular endothelial growth factor receptor signaling pathway	12	1.65316	SHB, SH2D2A, NCF2, MAPK13, PGF, FLT4, BCAR1, MAPKAPK3, RHOA, NCKAP1L, VAV1, PXN		GO:0070374	positive regulation of ERK1 and ERK2 cascade	22	6.51825	HAVCR2, ICAM1, HMGB1, CCL3, CCL2, C5AR1, CCR1, CCL8, TLR4, CCL5, CD74, LGALS9, CCL18, NOD2, CD36, CCL20, CCL3L1, RIPK2, TREM2, GPNMB, CIB1, CSF1R
	GO:0008544	epidermis development	12	1.19697	KRT17, SPRR1B, SPRR2A, UGCG, CRABP2, KRT14, FOXN1, HOXB13, EDAR, KRT85, KRT34, FABP5		GO:0008285	negative regulation of cell proliferation	22	1.666	CEBPA, LYN, S100A11, SLC9A3R1, STK4, SOD2, SPRY1, SSTR2, ALOX15B, BTG1, CCL3L1, CD33, SCIN, IRF1, IL1B, ADAMTS1, GPNMB, EMP3, CSK, CIB1, TP53INP1, CSF1R
	GO:0034599	cellular response to oxidative stress	11	1.60696	TXNDC8, TXN2, PRKRA, SNCA, FOXO1, ZC3H12A, NFE2L1, NFE2L2, SESN2, SETX, MT3		GO:0002250	adaptive immune response	20	6.41166	HAVCR2, PIK3CG, TNFRSF21, LYN, PIK3CD, CTSS, BTK, CD84, LILRB2, LILRA2, LILRA3, LILRB3, TAP1, CLEC4A, RIPK2, LIME1, CD4, CSK, CD6, SYK
	GO:0006952	defense response	11	1.48309	INHBA, CD83, LILRB5, LILRA2, LILRB3, FOXN1, CSF3R, HP, MX1, MX2, CD74		GO:0050852	T cell receptor signaling pathway	20	6.41166	FYB, PSMB10, TNFRSF21, CD3D, HLA-DRB3, CD247, PIK3CD, WAS, HLA-DQA1, PLCG2, HLA-DRB4, RIPK2, LIME1, HLA-DPA1, CD4, HLA-DPB1, INPP5D, CSK, HLA-DRA, CD28
	GO:0043086	negative regulation of catalytic activity	11	1.19804	TXNIP, HSPBP1, NES, NOSIP, PHACTR2, SLN, APOC2, TIMP4, TMBIM1, PDE6G, TIMP1		GO:0016032	viral process	20	2.32134	CEBPA, KAT2A, PSMB10, MICB, AP1G2, LYN, GRB2, HCK, CD247, HLA-B, NXF1, MMP1, VCAM1, FCGR2B, NUP210, RALA, HSPA8, SYK, PILRA, HLA-DRA
	GO:0042060	wound healing	11	1.04813	SLC11A1, SDC1, S100A8, CCL20, PDGFA, PECAM1, SCARB1, IL24, SPARC, CDH3, TIMP1		GO:0030593	neutrophil chemotaxis	19	11.6301	PIK3CG, CCL3, CCL2, C5AR1, PREX1, PIK3CD, NCKAP1L, CCL8, ITGB2, CCL5, VAV1, CCL18, CCL20, CCL3L1, CSF3R, IL1B, FCER1G, TREM1, SYK
	GO:0002548	monocyte chemotaxis	10	2.37259	CCL11, CCL1, CCL3, CCL20, CCL3L1, ANXA1, CCL4, XCL2, CCL18, S100A12		GO:0060333	interferon-gamma-mediated signaling pathway	19	11.0396	ICAM1, HCK, HLA-DRB3, OAS3, IFI30, HLA-B, STAT1, PRKCD, HLA-DQA1, HLA-F, VCAM1, FCGR1A, IRF8, HLA-DRB4, IRF1, HLA-DPA1, HLA-DPB1, PTAFR, HLA-DRA
	GO:0006094	gluconeogenesis	10	2.23178	CRTC2, GPD1, RBP4, ATF3, SDS, ENO2, FBP1, FBP2, PCK1, ENO1		GO:0007229	integrin-mediated signaling pathway	19	8.5022	ITGAL, FGR, PLEK, HCK, FERMT3, ITGB2, VAV1, ITGAM, DAB2, ITGAX, RCC2, PRAM1, ITGB7, FCER1G, ADAMTS1, ADAM8, ADAMDEC1, SYK, TYROBP
	GO:0043434	response to peptide hormone	10	2.23178	HHEX, TH, ANXA1, TIMP4, COL1A1, AREG, SPARC, NEFL, TIMP1, EIF2B5		GO:0071356	cellular response to tumor necrosis factor	19	7.74832	CEBPA, PID1, KAT2A, ICAM1, TNFRSF21, CCL3, CCL2, CAMP, CCL8, CCL5, CCL18, VCAM1, CYBA, CCL20, HAMP, CCL3L1, COL1A1, CIB1, GBA
	GO:0042542	response to hydrogen peroxide	10	1.81005	TXNIP, SDC1, TRPA1, HP, HBA2, COL1A1, AREG, HBB, FOSL1, SOD2		GO:0032496	response to lipopolysaccharide	18	4.54412	TNFRSF21, C5AR1, PTGER4, LY96, SNCA, MAPKAPK3, CXCL9, ACP5, TNFRSF14, TLR4, LGALS9, SOD2, VCAM1, SLC11A1, P2RX7, IL10RA, PLCG2, CD6
	GO:0071346	cellular response to interferon-gamma	10	1.5185	MRC1, CCL11, CCL1, CCL3, CCL20, CCL3L1, DAPK3, CCL4, XCL2, CCL18		GO:0030335	positive regulation of cell migration	18	3.91496	CCL3, FGR, LYN, AIF1, CCR1, FERMT3, PIK3CD, CCL5, CORO1A, DAB2, CXCL16, COL1A1, SEMA4D, GPNMB, MYLK, PLAU, CIB1, CSF1R
	GO:0050727	regulation of inflammatory response	10	1.2763	NAF1, SBNO2, DUOXA1, PGLYRP2, HCK, SEMA7A, SETD6, ANXA1, CMA1, SELE		GO:0042493	response to drug	18	1.63272	ICAM1, LPL, CARD9, LYN, SNCA, NCKAP1L, STAT1, ADA, SOD2, CYBA, P2RX7, CYBB, NPC1, ACSL1, SLC1A3, PLIN2, COL1A1, PARP4
	GO:0060337	type I interferon signaling pathway	10	1.23998	IFIT2, IFI27, ISG15, IFNA5, JAK1, MX1, MX2, IFI6, STAT2, IFNAR1		GO:0071222	cellular response to lipopolysaccharide	17	6.07061	HAVCR2, ICAM1, CCL2, LITAF, CAMP, TLR4, TLR5, LILRB2, TNFRSF1B, CD36, CCL20, HAMP, CXCL16, IRF8, TNFAIP3, CD14, NR1H3
	GO:0030512	negative regulation of transforming growth factor beta receptor signaling pathway	10	1.23998	ASPN, GLG1, ONECUT1, STRAP, CHST11, CIDEA, HTRA3, MTMR4, PIN1, FAM89B		GO:0005975	carbohydrate metabolic process	17	3.69514	GALNT3, MGAT4A, GBGT1, ADPGK, GUSB, NPL, MANBA, GALM, NAGPA, GLA, ALDH1B1, MLEC, AKR1B1, GAA, GK, MAN2B1, GBA
	GO:0008217	regulation of blood pressure	10	1.20472	CHGA, NPY, P2RX1, CD34, AGT, GUCY1A3, ATP1A2, HBB, NPPA, SOD2		GO:0006898	receptor-mediated endocytosis	17	3.3677	OLR1, SORL1, PPT1, TINAGL1, M6PR, CD163, ASGR1, MARCO, DAB2, CD36, FOLR2, APOE, FCGR1A, CXCL16, SCARB1, CD6, CD14
	GO:0043627	response to estrogen	10	1.20472	APOA2, GATA6, IL4R, DTYMK, RCAN1, CRIPAK, TSHB, MMP14, GAL, CITED2		GO:0042102	positive regulation of T cell proliferation	16	9.20753	HAVCR2, AIF1, NCKAP1L, HLA-DMB, CCL5, VCAM1, LILRB2, CORO1A, TNFSF13B, IL1B, CD4, HLA-DPA1, HLA-DPB1, CD6, SASH3, CD28
	GO:0006879	cellular iron ion homeostasis	9	1.73376	LCN2, TF, SLC11A1, ALAS2, HPX, HAMP, TFR2, CP, FTL		GO:0006952	defense response	16	8.4867	RNASE6, CXCL9, HLA-B, WAS, CD74, CD48, CD84, CD83, KCNN4, NOD2, LILRA2, LILRA3, LILRB3, TAP1, CSF3R, MX2
	GO:0001755	neural crest cell migration	9	1.67833	SOX10, OVOL2, SEMA3G, SEMA7A, SEMA4C, SEMA3B, ISL1, SOX8, SEMA4A		GO:0031295	T cell costimulation	16	7.52984	LYN, CD3D, GRB2, HLA-DRB3, CD247, TNFRSF14, VAV1, HLA-DQA1, TNFSF13B, HLA-DRB4, CD4, HLA-DPA1, HLA-DPB1, CSK, HLA-DRA, CD28
	GO:0010595	positive regulation of endothelial cell migration	9	1.6249	AGT, FLT4, BCAR1, AAMP, ZC3H12A, SCARB1, ATOH8, SPARC, PROX1		GO:0007267	cell-cell signaling	16	1.68207	CCL3, BST2, GRB2, CCR1, CXCL9, CCL8, ITGB2, CCL5, CCL18, C1QA, LILRB2, SSTR2, CCL20, CD33, IL1B, MERTK
	GO:0050885	neuromuscular process controlling balance	9	1.6249	GM2A, TNR, ADCY5, NKX6-2, ALDH1A3, AARS, NEFL, CACNA1A, FOXS1		GO:0032760	positive regulation of tumor necrosis factor production	15	9.74574	HMGB1, CCL3, CARD9, CCL2, LY96, TLR4, CYBA, NOD2, CD36, CD2, RIPK2, FCER1G, CD14, SASH3, PTAFR
	GO:0070301	cellular response to hydrogen peroxide	9	1.14524	LCN2, PPIF, IL18RAP, ANXA1, FOXO1, FABP1, NFE2L2, KDM6B, SETX		GO:0019886	antigen processing and presentation of exogenous peptide antigen via MHC class II	15	5.76844	LGMN, HLA-DRB3, IFI30, CTSS, HLA-DMB, HLA-DMA, CD74, HLA-DQA1, HLA-DRB4, FCER1G, CTSD, HLA-DPA1, HLA-DPB1, HLA-DOA, HLA-DRA
	GO:0009612	response to mechanical stimulus	9	1.0754	TXNIP, RETN, GATA4, CHI3L1, RCAN1, BDKRB1, MMP14, FOSL1, CITED2		GO:0030168	platelet activation	15	4.61739	PIK3CG, GNA15, LYN, PRKCH, ITPR3, VAV1, PRKCD, RAC2, PLCG2, COL1A2, FCER1G, COL1A1, MERTK, RHOG, SYK
	GO:0006906	vesicle fusion	9	1.0754	DYSF, SYT4, VAMP8, SYT10, SYT2, SYT11, SYT8, SYT13, TC2N		GO:0006629	lipid metabolic process	15	3.17097	LPL, PLA2G15, LIPA, APOC1, APOC2, TECR, DAGLB, PNPLA7, CD36, ALOX15B, TPP1, AOAH, PLCG2, PLTP, FABP5
	GO:0050832	defense response to fungus	8	2.43149	CHGA, S100A8, HAMP, DEFA4, DEFA3, DEFA1, COTL1, S100A12		GO:0051607	defense response to virus	15	2.95922	CARD9, BST2, CD8A, FAM111A, OAS3, CXCL9, IFI44L, STAT1, TLR7, STAT2, ITGAX, ISG15, IL10RB, IRF1, MX2
	GO:0048247	lymphocyte chemotaxis	8	2.33613	CCL11, CCL1, CCL3, CCL20, CCL3L1, ADAM8, XCL2, CCL18		GO:0046777	protein autophosphorylation	15	2.78661	FGR, LYN, HCK, STK10, MAPKAPK3, PIM1, MAP4K1, FES, STK4, DAPK1, RIPK3, CSK, MAP3K11, CSF1R, SYK
	GO:0043542	endothelial cell migration	8	2.24568	S100P, PECAM1, PRSS3, RHOA, ITGB2, TNFSF12-TNFSF13, PLXND1, LOXL2		GO:0060337	type I interferon signaling pathway	14	6.90037	BST2, OAS3, HLA-B, STAT1, IFI35, HLA-F, STAT2, TYK2, ISG15, IRF8, IRF1, XAF1, MX2, IFI6
	GO:0055072	iron ion homeostasis	8	2.15977	TF, SLC11A1, EIF2AK1, TFR2, SLC25A37, STEAP2, FTL, SOD2		GO:0038096	Fc-gamma receptor signaling pathway involved in phagocytosis	14	3.55758	LYN, FGR, GRB2, FCGR1A, HCK, PLCG2, CD247, MYO1G, NCKAP1L, FCGR2A, PRKCD, WAS, VAV1, SYK
	GO:0071526	semaphorin-plexin signaling pathway	8	1.92604	SEMA3G, SEMA7A, PLXNB3, SEMA4C, SEMA3B, PLXND1, FLNA, SEMA4A		GO:0007204	positive regulation of cytosolic calcium ion concentration	14	3.33009	PIK3CG, C3AR1, HMGB1, GNA15, C5AR1, PTGER4, SWAP70, CCR1, FPR1, CD52, FPR3, ITPR3, CD36, CXCR4
	GO:0050919	negative chemotaxis	8	1.85522	FLRT2, SEMA3G, PDGFA, SEMA7A, RHOA, SEMA4C, SEMA3B, SEMA4A		GO:0008360	regulation of cell shape	14	3.14856	ICAM1, CCL3, CCL2, FGR, HCK, ITGB2, FES, SLC9A3R1, EPB41L3, CORO1A, CSNK1D, SEMA4D, FGD3, CSF1R
	GO:0033572	transferrin transport	8	1.78756	TF, ATP6AP1, TFR2, MCOLN1, ATP6V1G1, ATP6V1D, ATP6V0B, ATP6V1F		GO:0042127	regulation of cell proliferation	14	2.08934	SAT1, TNFRSF21, FGR, CXCL9, S100A11, TNFRSF14, FES, BTK, TYK2, TNFRSF1B, IL4R, CSK, PLAU, CIB1
	GO:0017158	regulation of calcium ion-dependent exocytosis	8	1.78756	SYT4, SYT10, SYT2, SYT11, SYT8, SYT13, TC2N, CACNA1A		GO:0031663	lipopolysaccharide-mediated signaling pathway	13	9.76549	CCL3, CCL2, LYN, LY96, HCK, TLR4, CCL5, IL1B, RIPK2, SCARB1, CD6, PTAFR, CD14
	GO:0071902	positive regulation of protein serine/threonine kinase activity	8	1.78756	CDK5R2, FAM20A, SNCA, RHOA, LTF, IGF2, STK3, CALM2		GO:0032755	positive regulation of interleukin-6 production	13	7.82973	RAB7B, CARD9, TLR4, TLR7, LILRB2, CYBA, P2RX7, NOD2, CD36, MAPK13, IL1B, FCER1G, RIPK2
	GO:0034332	adherens junction organization	8	1.66093	PVR, CDH12, CADM3, CDH18, CDH1, CDH3, CDH10, NUMBL		GO:0019882	antigen processing and presentation	13	6.77634	MICB, CD8A, HLA-DRB3, HLA-DRB4, HLA-DPA1, FCGRT, HLA-B, HLA-DPB1, CTSS, HLA-DMB, HLA-DQA1, CD74, HLA-DRA
	GO:0032720	negative regulation of tumor necrosis factor production	8	1.60161	HAVCR2, CD34, ACP5, ZC3H12A, CIDEA, LBP, GPNMB, ADIPOQ		GO:0060326	cell chemotaxis	13	5.94327	VCAM1, C3AR1, CCL3, CCL2, C5AR1, CCL20, FPR1, CXCL9, CCL8, FPR3, CCL5, PRKCD, RHOG
	GO:0042157	lipoprotein metabolic process	8	1.60161	APOA2, SDC1, LRP1, APOE, APOC1, APOC2, SCARB1, ABCA1		GO:0001934	positive regulation of protein phosphorylation	13	3.01511	AIF1, FAM20A, CAMP, MMP9, STK4, PLAUR, DAB2, CSNK1D, IL1B, SEMA4D, GPNMB, CSF1R, CIB1
	GO:0006953	acute-phase response	8	1.54474	SAA2, MRGPRX1, HAMP, SERPINF2, TFR2, CRP, HP, LBP		GO:0051092	positive regulation of NF-kappaB transcription factor activity	13	2.84047	ICAM1, RAB7B, NOD2, RIPK3, RIPK2, PRKCH, IL1B, TLR4, ITGB2, ADAM8, LGALS9, BTK, CIB1
	GO:0048791	calcium ion-regulated exocytosis of neurotransmitter	8	1.54474	SYT4, SYT10, SYT2, SYT11, SYT8, SYT13, TC2N, CACNA1A		GO:0042742	defense response to bacterium	13	2.52456	CAMP, TLR1, TLR4, TLR5, PRKCD, SLC11A1, NOD2, CCL20, ISG15, HAMP, IRF8, FCER1G, SYK
	GO:0008219	cell death	8	1.54474	GZMM, FOSL2, CLU, RRAGA, CIDEA, PARP4, EMP2, CACNA1A		GO:0007568	aging	13	2.08011	CCL2, LITAF, GRB2, SNCA, BCL2A1, MMP7, ITGB2, ADA, VCAM1, TNFRSF1B, HAMP, UCP2, CTSC
	GO:0014823	response to activity	8	1.33923	SLC25A25, MYH2, TH, ADIPOQ, KDM6B, SCO2, PCK1, SOD2		GO:0007596	blood coagulation	13	1.73336	P2RX7, CD36, LYN, COL1A2, IRF1, SH2B3, FCER1G, SERPINA1, COL1A1, DOCK8, WAS, PLAU, PLAUR
	GO:0045429	positive regulation of nitric oxide biosynthetic process	8	1.33923	ICAM1, AGT, CLU, ITGB2, PTX3, DDAH2, HBB, SOD2		GO:0032729	positive regulation of interferon-gamma production	12	6.69428	HAVCR2, SLC11A1, IL27RA, IRF8, SLAMF6, RIPK2, IL1B, TLR4, HLA-DPA1, HLA-DPB1, CD14, SASH3
	GO:0008015	blood circulation	8	1.24807	HOXB2, NFE2, NPY, OLR1, GUCY1A3, RCAN1, XCL2, CXCL10		GO:0071346	cellular response to interferon-gamma	12	5.69546	CCL3, CCL2, GBP5, CCL20, AIF1, CCL3L1, CCL8, HLA-DPA1, CCL5, CCL18, LGALS9, DAPK1
	GO:0051591	response to cAMP	8	1.20505	SDC1, NDUFS4, PER1, COL1A1, AREG, SPARC, VGF, FOSL1		GO:0050729	positive regulation of inflammatory response	12	4.61619	LPL, CCL3, CCL2, PTGER4, MAPK13, CCL3L1, PLA2G7, CCL8, TLR4, CCL5, TLR7, CCL18
	GO:0045165	cell fate commitment	8	1.20505	ONECUT1, GATA6, GATA4, NEUROG1, NEUROD4, SOX8, KDM6B, GAP43		GO:0050830	defense response to Gram-positive bacterium	12	3.99236	HAVCR2, P2RX7, CARD9, CD36, C5AR1, IL27RA, FGR, CAMP, LYZ, RIPK2, ACP5, TNFRSF14
	GO:0031532	actin cytoskeleton reorganization	8	1.16364	S1PR2, CDC42BPG, ANXA1, RHOA, FLNA, PARVA, CDC42BPB, INSRR		GO:0001666	response to hypoxia	12	1.57458	SLC11A2, VCAM1, CYBA, CCL2, PLOD1, CXCR4, UCP2, HMOX1, TGFBR3, PLAU, ADA, SOD2
	GO:0006909	phagocytosis	8	1.12375	SLC11A1, UNC13D, EIF2AK1, ICAM5, PECAM1, ELANE, ANXA1, ITGB2		GO:0030574	collagen catabolic process	11	4.38716	MMP9, COL1A2, MMP7, CTSD, COL1A1, CTSS, CTSB, FURIN, MMP12, MMP1, MMP11
	GO:0031424	keratinization	8	1.12375	KRT17, LCE3B, SPRR1B, SPRR2A, LCE3C, LCE2A, LCE1A, CDH3		GO:0097190	apoptotic signaling pathway	11	3.99231	TNFRSF21, P2RX7, TNFRSF1B, LY96, RIPK3, TNFRSF14, TLR4, CD14, BTK, DAPK1, CD28
	GO:0015992	proton transport	8	1.08531	UCP2, ATP6AP1, ATP5B, ATP5O, SLC15A3, ATP6V1D, ATP6V0B, ATP6V1F		GO:0022617	extracellular matrix disassembly	11	3.74053	MMP9, CAPG, MMP7, CTSS, ADAM8, FURIN, MMP12, LCP1, MMP1, SPP1, MMP11
	GO:0018149	peptide cross-linking	8	1.04826	LCE3B, SPRR1B, SPRR2A, LCE3C, ANXA1, TGM4, LCE2A, LCE1A		GO:0007169	transmembrane receptor protein tyrosine kinase signaling pathway	11	2.92152	TYK2, CD8A, LYN, FGR, HCK, CD4, CSK, CSF1R, SYK, BTK, PILRA
	GO:0033344	cholesterol efflux	7	1.97623	ABCG8, APOA2, APOE, APOC1, APOC2, SCARB1, ABCA1		GO:0000187	activation of MAPK activity	11	2.56679	P2RX7, NOD2, C5AR1, CXCR4, MAPKAPK3, FPR1, RIPK2, IL1B, TLR4, CD74, MAP3K11
	GO:0050999	regulation of nitric-oxide synthase activity	7	1.89108	NOSIP, SPR, CYGB, WASL, DDAH2, GCHFR, CALM2		GO:0019221	cytokine-mediated signaling pathway	11	1.95333	CEBPA, CCL2, IL10RB, IL10RA, CCR1, HCK, IL1B, CSF3R, CSF2RA, EBI3, CSF1R
	GO:0006027	glycosaminoglycan catabolic process	7	1.89108	GNS, SGSH, SDC1, HPSE2, GUSB, GPC1, SDC3		GO:0051056	regulation of small GTPase mediated signal transduction	11	1.88889	ARHGAP4, ARHGAP30, ARHGAP22, ARHGEF3, RAC2, GMIP, MYO9B, VAV1, RHOG, FGD3, ARHGAP9
	GO:0060349	bone morphogenesis	7	1.81067	GLG1, MSX1, OSR2, LTF, ACP5, MMP13, CITED2		GO:0006959	humoral immune response	10	4.03997	PSMB10, TNFRSF21, CD83, CCL2, BST2, LY86, TREM1, TREM2, EBI3, CD28
	GO:0010942	positive regulation of cell death	7	1.66257	AKR1C3, UCP2, ZC3H12A, HP, HBA2, HBB, MT3		GO:0070098	chemokine-mediated signaling pathway	10	3.2985	CCL3, CCL2, CCL20, CXCR4, CCL3L1, CCR1, CXCL9, CCL8, CCL5, CCL18
	GO:0002376	immune system process	7	1.66257	ADSSL1, CD300A, CD300LG, IDO2, CD300LF, HP, GPR17		GO:0071260	cellular response to mechanical stimulus	10	3.2985	CYBA, PTGER4, MAP3K1, IRF1, MMP7, IL1B, TLR4, COL1A1, TLR5, TLR7
	GO:0030203	glycosaminoglycan metabolic process	7	1.66257	GNS, SDC1, BGN, B3GAT3, CSPG5, GPC1, SDC3		GO:0045454	cell redox homeostasis	10	3.03816	CYBA, SLC11A1, TXNDC12, CYBB, NCF2, CAMP, NCF4, SH3BGRL3, PDIA4, SCO2
	GO:0030449	regulation of complement activation	7	1.59422	CFP, C8B, C7, C5AR1, C4A, C6, PROS1		GO:0050728	negative regulation of inflammatory response	10	2.95747	TNFRSF1B, PTGER4, APOE, AOAH, ACP5, TNFAIP3, PRKCD, ADA, NR1H3, GBA
	GO:2000379	positive regulation of reactive oxygen species metabolic process	7	1.59422	AKR1C3, CDKN1A, DUOXA1, AGT, ZC3H12A, NFE2L2, NQO2		GO:0050731	positive regulation of peptidyl-tyrosine phosphorylation	10	2.84158	ICAM1, CD36, HCLS1, RIPK2, TNFRSF14, CD4, SEMA4D, TREM2, CD74, SYK
	GO:2001244	positive regulation of intrinsic apoptotic signaling pathway	7	1.40881	DFNA5, S100A8, BOK, BBC3, PRKRA, CLU, SLC9A3R1		GO:0009615	response to virus	10	1.9903	IFIH1, NPC2, BST2, FGR, CXCR4, OAS3, CCL8, IFI44, CCL5, MX2
	GO:0001942	hair follicle development	7	1.15314	INHBA, SOX21, PDGFA, AARS, FOXN1, EDAR, APCDD1		GO:0043524	negative regulation of neuron apoptotic process	10	1.52363	CORO1A, CCL2, C5AR1, APOE, HMOX1, LGMN, SNCA, PPT1, ADAM8, SOD2
	GO:0000302	response to reactive oxygen species	7	1.10859	PLK3, APOE, PRDX6, TXN2, PRDX5, PRDX1, SOD2		GO:0002504	antigen processing and presentation of peptide or polysaccharide antigen via MHC class II	9	7.62117	HLA-DRB3, HLA-DRB4, HLA-DPA1, HLA-DPB1, HLA-DMB, HLA-DOA, HLA-DMA, HLA-DQA1, HLA-DRA
	GO:1901215	negative regulation of neuron death	7	1.06594	CSF3, CHGA, CD34, APOE, SNCA, IKBKG, GPNMB		GO:0002755	MyD88-dependent toll-like receptor signaling pathway	9	5.06606	CD36, LY96, MAP3K1, TLR1, TLR4, TLR5, TLR7, CD14, BTK
	GO:0006520	cellular amino acid metabolic process	7	1.06594	DDC, PEPD, SDS, HDC, GOT1L1, QDPR, SLC7A5		GO:0043407	negative regulation of MAP kinase activity	9	4.76538	SPRY1, LYN, APOE, CD300A, SORL1, IL1B, CDK5RAP3, PRKCD, GBA
	GO:0031640	killing of cells of other organism	6	2.51207	CHGA, HAMP, DEFA4, DEFA3, DEFA1, S100A12		GO:0051603	proteolysis involved in cellular protein catabolic process	9	3.81978	PSMB10, GZMA, LGMN, CTSA, CTSC, CTSS, CTSB, TINAGL1, CPVL
	GO:0015671	oxygen transport	6	2.36434	HBG1, CYGB, HBA2, HBG2, HBB, HBD		GO:0050853	B cell receptor signaling pathway	9	3.45416	KLHL6, LYN, PIK3CD, PLCG2, MNDA, NCKAP1L, LIME1, SYK, BTK
	GO:0006940	regulation of smooth muscle contraction	6	2.2299	KCNB2, ADRA2C, ATP1A2, DAPK3, CHRNA3, NMU		GO:0071407	cellular response to organic cyclic compound	9	3.18777	CEBPA, CYBA, NOD2, CCL3, CCL2, RGS19, IL1B, CCL5, STAT1
	GO:0043691	reverse cholesterol transport	6	1.9937	APOA2, APOE, CLU, APOC2, SCARB1, ABCA1		GO:0006968	cellular defense response	9	3.04185	LILRB2, C5AR1, NCF2, LY96, MNDA, CXCL9, CD300C, CLEC5A, TYROBP
	GO:0042776	mitochondrial ATP synthesis coupled proton transport	6	1.70211	ATP5B, CYC1, ATP5F1, ATP5O, COX5B, ATP5J		GO:0002479	antigen processing and presentation of exogenous peptide antigen via MHC class I, TAP-dependent	9	2.99528	PSMB10, CYBA, CYBB, CD36, NCF2, FCGR1A, NCF4, HLA-B, HLA-F
	GO:2001243	negative regulation of intrinsic apoptotic signaling pathway	6	1.61802	PPIF, HERPUD1, MAPK8IP1, VDAC2, NDUFS3, PLAUR		GO:0046330	positive regulation of JNK cascade	9	2.90507	HMGB1, DUSP19, NOD2, CARD9, MAP4K2, RIPK2, IL1B, TLR4, MAP3K11
	GO:0030206	chondroitin sulfate biosynthetic process	6	1.39642	BGN, CHPF, CHST11, CHST3, CHST13, CSPG5		GO:0071347	cellular response to interleukin-1	9	2.65553	ICAM1, CCL3, CCL2, CCL20, CCL3L1, CAMP, CCL8, CCL5, CCL18
	GO:0070328	triglyceride homeostasis	6	1.33127	APOE, IL18, APOC2, SCARB1, SESN2, ANGPTL4		GO:0048010	vascular endothelial growth factor receptor signaling pathway	9	2.61674	CYBA, CYBB, CCL2, NCF2, MAPK13, NCF4, MAPKAPK3, NCKAP1L, VAV1
	GO:0048863	stem cell differentiation	6	1.26985	LIF, ZNF281, MSX1, SOX21, HOXA7, SETD6		GO:0046718	viral entry into host cell	9	2.33129	ICAM1, NPC1, VAMP8, ITGB7, SCARB1, TNFRSF14, ANPEP, CTSB, CLEC5A
	GO:0035329	hippo signaling	6	1.26985	FAT4, TEAD4, AMOTL1, AMOTL2, YWHAE, STK3		GO:0016042	lipid catabolic process	9	2.17263	PLD3, LPL, LIPA, PLCG2, PLA2G7, APOC2, PPT1, PLCB2, DAGLB
	GO:0010033	response to organic substance	6	1.21186	S100P, AQP9, SERPINF2, TRPA1, CDH1, TIMP4		GO:0034142	toll-like receptor 4 signaling pathway	8	6.03812	LY96, RIPK2, PIK3AP1, TLR4, ITGB2, ITGAM, CD14, LGALS9
	GO:0042423	catecholamine biosynthetic process	5	3.3231	DDC, PNMT, HDC, TH, DBH		GO:0002224	toll-like receptor signaling pathway	8	4.70416	LGMN, TLR1, MAPKAPK3, CNPY3, TLR4, CTSS, CTSB, TLR7
	GO:0061564	axon development	5	2.28679	PLP1, NEFH, NEFL, NEFM, GAP43		GO:0038083	peptidyl-tyrosine autophosphorylation	8	3.54258	TYK2, LYN, FGR, HCK, FES, CSK, SYK, BTK
	GO:0002523	leukocyte migration involved in inflammatory response	5	2.11775	S100A8, ELANE, ITGB2, ADAM8, SELE		GO:0002548	monocyte chemotaxis	8	3.4067	CCL3, CCL2, FOLR2, CCL20, CCL3L1, CCL8, CCL5, CCL18
	GO:0033700	phospholipid efflux	5	1.71707	APOA2, APOE, APOC1, APOC2, ABCA1		GO:0007584	response to nutrient	8	1.97254	VCAM1, CYBB, SSTR2, NOD2, ACSL1, ARSA, C2, STAT1
	GO:0051412	response to corticosterone	5	1.33887	CDKN1A, TH, NEFL, FOSL1, CALM2		GO:0008286	insulin receptor signaling pathway	8	1.85403	ATP6V1A, SORBS1, GRB2, ATP6V0A1, ATP6V1B2, ATP6V0D1, ATP6V0B, ATP6V1F
	GO:0007263	nitric oxide mediated signal transduction	5	1.26275	NOS1, APOE, AGT, GUCY1A3, DDAH2		GO:0043085	positive regulation of catalytic activity	8	1.7708	PIK3CG, APH1A, GMFG, ALOX5AP, NCF4, APOC1, CTSA, CIB1
	GO:0042832	defense response to protozoan	5	1.26275	BATF, SLC11A1, CCDC88B, IL4R, BCL3		GO:0006887	exocytosis	8	1.71781	MYO5A, CCL3, CCR1, MYO1G, CCL8, RALA, CCL5, SLC17A9
	GO:0042474	middle ear morphogenesis	5	1.1923	MSX1, OSR2, INSIG2, PRKRA, RPL38		GO:0032733	positive regulation of interleukin-10 production	7	4.11851	HMGB1, CD83, NOD2, FCER1G, TLR4, SASH3, CD28
	GO:0042326	negative regulation of phosphorylation	5	1.1923	CDKN1C, INHBA, CDKN1A, DYNLL1, RHOH		GO:0007159	leukocyte cell-cell adhesion	7	3.89865	VCAM1, ICAM1, ITGAL, FERMT3, ITGB2, CCL5, SYK
	GO:0042744	hydrogen peroxide catabolic process	5	1.1923	PRDX6, PRDX5, HBA2, HBB, PRDX1		GO:0048247	lymphocyte chemotaxis	7	3.60717	CCL3, CCL2, CCL20, CCL3L1, CCL8, ADAM8, CCL18
	GO:0019835	cytolysis	5	1.12689	GZMM, C8B, C7, C6, GZMB		GO:0033572	transferrin transport	7	3.05738	SLC11A2, ATP6V1A, ATP6V0A1, ATP6V1B2, ATP6V0D1, ATP6V0B, ATP6V1F
	GO:0042346	positive regulation of NF-kappaB import into nucleus	5	1.12689	IL18, SPHK1, RHOA, EDAR, TLR7		GO:0032720	negative regulation of tumor necrosis factor production	7	2.86283	HAVCR2, MC1R, ACP5, TLR4, GPNMB, TNFAIP3, LGALS9
	GO:0045987	positive regulation of smooth muscle contraction	5	1.12689	PROK2, TACR2, EDN2, SPHK1, NMU		GO:0045429	positive regulation of nitric oxide biosynthetic process	7	2.57879	ICAM1, AIF1, IL1B, TLR4, ITGB2, TLR5, SOD2
	GO:0090023	positive regulation of neutrophil chemotaxis	5	1.066	CXCL1, C5AR1, NCKAP1L, LBP, CD74		GO:0006687	glycosphingolipid metabolic process	7	2.47692	GLA, GM2A, UGCG, ARSA, NEU1, CTSA, GBA
	GO:0032465	regulation of cytokinesis	5	1.066	PLK3, KLHL21, CETN2, CALM2, PIN1		GO:0042110	T cell activation	7	2.38082	PIK3CG, CD48, CD8A, PIK3CD, CD2, WAS, ADA
	GO:0001836	release of cytochrome c from mitochondria	5	1.00919	BOK, BBC3, CLU, IFI6, SOD2		GO:0006909	phagocytosis	7	2.33477	ITGAL, SLC11A1, CORO1A, IRF8, ITGB2, MERTK, CD14
	GO:0045662	negative regulation of myoblast differentiation	5	1.00919	IL18, ANKRD2, SOX8, CMTM5, CXCL10		GO:0015992	proton transport	7	2.28998	ATP6V1A, UCP2, ATP6V1B2, ATP6V0D1, SLC15A3, ATP6V0B, ATP6V1F
	GO:0034384	high-density lipoprotein particle clearance	4	2.10893	APOA2, APOE, APOC2, SCARB1		GO:0014070	response to organic cyclic compound	7	2.28998	KAT2A, ICAM1, CD83, ACSL1, PLIN2, LYN, LUM
	GO:0021520	spinal cord motor neuron cell fate specification	4	1.89152	HOXC10, OLIG3, ISL1, HOXD10		GO:0050829	defense response to Gram-negative bacterium	7	2.04479	SLC11A1, CAMP, LYZ, TNFRSF14, CD4, TLR4, TLR5
	GO:0051354	negative regulation of oxidoreductase activity	4	1.89152	OXA1L, PRDX5, HP, MT3		GO:0007249	I-kappaB kinase/NF-kappaB signaling	7	1.86679	CARD9, LY96, RIPK3, RIPK2, TLR4, CD14, BTK
	GO:0045576	mast cell activation	4	1.71292	CHGA, FCER1G, RHOH, S100A12		GO:0048661	positive regulation of smooth muscle cell proliferation	7	1.86679	CYBA, AIF1, HMOX1, AKR1B1, CCL5, STAT1, PTAFR
	GO:0010873	positive regulation of cholesterol esterification	4	1.56224	APOA2, APOE, AGT, APOC1		GO:0042632	cholesterol homeostasis	7	1.73865	LPL, NPC1, NPC2, APOE, APOC2, SCARB1, NR1H3
	GO:0002281	macrophage activation involved in immune response	4	1.56224	HAVCR2, SBNO2, LBP, TYROBP		GO:0014068	positive regulation of phosphatidylinositol 3-kinase signaling	7	1.70838	FGR, HCLS1, PIK3AP1, SEMA4D, CCL5, HCST, CD28
	GO:0008228	opsonization	4	1.43262	CRP, SFTPA1, LBP, PTX3		GO:0071223	cellular response to lipoteichoic acid	6	5.37471	CD36, CCL20, RIPK2, TLR4, TREM2, CD14
	GO:0016064	immunoglobulin mediated immune response	4	1.31949	IL4R, FCER1G, CD74, IL13RA2		GO:0051044	positive regulation of membrane protein ectodomain proteolysis	6	4.06877	TNFRSF1B, APOE, IL1B, SH3D19, ADAM8, FURIN
	GO:0033690	positive regulation of osteoblast proliferation	4	1.31949	GATA1, LTF, TMEM119, SOX8		GO:0090026	positive regulation of monocyte chemotaxis	6	3.91788	HMGB1, CCL2, AIF1, CCR1, PLA2G7, CCL5
	GO:0030195	negative regulation of blood coagulation	4	1.21961	CD34, APOE, PROS1, PROC		GO:0050850	positive regulation of calcium-mediated signaling	6	3.41499	CCL3, CD8A, CD4, TREM2, ADA, SYK
	GO:0006069	ethanol oxidation	4	1.21961	ADH1C, ADH5, ADH1B, ADH7		GO:0019835	cytolysis	6	3.30868	P2RX7, MICB, GZMA, MMD, LYZ, GZMH
	GO:0006826	iron ion transport	4	1.21961	SLC11A1, TFR2, TTYH1, FTL		GO:0060135	maternal process involved in female pregnancy	6	2.93896	HAVCR2, CCL2, ADCY7, AKR1B1, MMP7, LGALS9
	GO:0045019	negative regulation of nitric oxide biosynthetic process	4	1.1306	GLA, CD34, ACP5, ZC3H12A		GO:0050715	positive regulation of cytokine secretion	6	2.93896	PTGER4, CADM1, FGR, CLEC5A, CD14, SYK
	GO:0006809	nitric oxide biosynthetic process	4	1.1306	NOS1, SPR, DDAH2, GCHFR		GO:0033344	cholesterol efflux	6	2.93896	NPC1, NPC2, APOE, APOC1, APOC2, SCARB1
	GO:0001817	regulation of cytokine production	4	1.1306	CD83, LITAF, ANKRD2, LTF		GO:0090383	phagosome acidification	6	2.78074	ATP6V1A, ATP6V0A1, ATP6V1B2, ATP6V0D1, ATP6V0B, ATP6V1F
	GO:0002526	acute inflammatory response	4	1.1306	APOA2, EIF2AK1, S100A8, NUPR1		GO:0032715	negative regulation of interleukin-6 production	6	2.70703	HAVCR2, NCKAP1L, TLR4, CSK, TNFAIP3, GBA
	GO:0001878	response to yeast	4	1.1306	NPY, CAMP, ELANE, PTX3		GO:0050766	positive regulation of phagocytosis	6	2.63655	CYBA, SLC11A1, DOCK2, FCER1G, IL1B, MERTK
	GO:0010875	positive regulation of cholesterol efflux	4	1.05067	LRP1, APOE, ABCA1, ADIPOQ		GO:0030217	T cell differentiation	6	2.56907	CD3D, PREX1, PIK3CD, CD4, IL7R, VAV1
	GO:0010001	glial cell differentiation	4	1.05067	METRN, DNER, NEUROD4, GAP43		GO:0015991	ATP hydrolysis coupled proton transport	6	2.44227	ATP6V1A, ATP6V0A1, ATP6V1B2, ATP6V0D1, ATP6V0B, ATP6V1F
	GO:0019395	fatty acid oxidation	4	1.05067	ACSM1, ADIPOR2, CYGB, ADIPOQ		GO:0071902	positive regulation of protein serine/threonine kinase activity	6	2.26986	ACSL1, FAM20A, SNCA, STK4, CSF1R, CIB1
	GO:0051612	negative regulation of serotonin uptake	3	1.76719	NOS1, SNCA, GPM6B		GO:0042130	negative regulation of T cell proliferation	6	2.16514	HAVCR2, TNFRSF21, LILRB2, HLA-DRB4, GPNMB, VSIG4
	GO:0033693	neurofilament bundle assembly	3	1.76719	NEFH, NEFL, NEFM		GO:0030890	positive regulation of B cell proliferation	6	2.0675	TNFSF13B, NCKAP1L, TLR4, CD74, SASH3, ADA
	GO:0071395	cellular response to jasmonic acid stimulus	3	1.48901	AKR1C3, AKR1C2, AKR1C1		GO:0031623	receptor internalization	6	1.89061	CD36, GRB2, SNCA, FCER1G, ITGB2, SYK
	GO:0030200	heparan sulfate proteoglycan catabolic process	3	1.48901	SGSH, HPSE2, GPC1		GO:0016241	regulation of macroautophagy	6	1.84977	ATP6V1A, ATP6V0A1, ATP6V1B2, ATP6V0D1, ATP6V0B, GBA
	GO:0070293	renal absorption	3	1.48901	AKR1C3, SLC9A3R1, HBB		GO:0032147	activation of protein kinase activity	6	1.81016	SLC11A1, HMGB1, DUSP19, RIPK3, NCKAP1L, PRKCD
	GO:0046684	response to pyrethroid	3	1.48901	DDC, SCN2B, TH		GO:0070373	negative regulation of ERK1 and ERK2 cascade	6	1.38502	SPRY1, TBC1D10C, LYN, TLR4, SLC9A3R1, CSK
	GO:0032375	negative regulation of cholesterol transport	3	1.48901	APOA2, APOC1, APOC2		GO:0009967	positive regulation of signal transduction	6	1.30571	ARHGAP4, SORBS1, LASP1, GRB2, SH2B3, SLA
	GO:0018119	peptidyl-cysteine S-nitrosylation	3	1.48901	NOS1, S100A8, ADH5		GO:0071404	cellular response to low-density lipoprotein particle stimulus	5	3.89725	NPC1, CD36, FCER1G, ITGB2, SYK
	GO:0060214	endocardium formation	3	1.48901	OVOL2, SOX17, PROX1		GO:0016064	immunoglobulin mediated immune response	5	3.5019	IL4R, FCER1G, INPP5D, PRKCD, CD74
	GO:0036091	positive regulation of transcription from RNA polymerase II promoter in response to oxidative stress	3	1.28986	NFE2L2, SESN2, MT3		GO:0045730	respiratory burst	5	3.18886	CYBA, SLC11A1, CYBB, NCF2, CD52
	GO:0019076	viral release from host cell	3	1.1363	RAB7A, PPID, VPS4B		GO:0030889	negative regulation of B cell proliferation	5	3.05409	TNFRSF21, LYN, CD300A, MNDA, INPP5D
	GO:0071799	cellular response to prostaglandin D stimulus	3	1.1363	AKR1C3, AKR1C2, PTGFR		GO:0007035	vacuolar acidification	5	3.05409	SLC11A1, CLIC4, ATP6V0A1, ATP6V0D1, ATP6V0B
	GO:0060536	cartilage morphogenesis	3	1.1363	MSX1, HAND1, SNAI1		GO:0071361	cellular response to ethanol	5	3.05409	CYBB, ADCY7, SPI1, SOD2, TP53INP1
	GO:0030816	positive regulation of cAMP metabolic process	3	1.1363	CHGA, PF4, CXCL10		GO:0043277	apoptotic cell clearance	5	2.93074	MARCO, HMGB1, CD36, MERTK, NR1H3
	GO:0030644	cellular chloride ion homeostasis	3	1.1363	TBXAS1, CACNA1A, CKB		GO:0002407	dendritic cell chemotaxis	5	2.71194	PIK3CG, HMGB1, CXCR4, CCR1, CCL5
	GO:0034382	chylomicron remnant clearance	3	1.1363	APOE, APOC1, APOC2		GO:0042098	T cell proliferation	5	2.52273	PIK3CG, PSMB10, P2RX7, RIPK2, EBI3
	GO:0043615	astrocyte cell migration	3	1.1363	CCL3, MMP14, APCDD1		GO:0006801	superoxide metabolic process	5	2.43709	CYBA, CYBB, NCF2, PREX1, SOD2
	GO:0042255	ribosome assembly	3	1.1363	NPM1, EIF2A, VCX		GO:0071345	cellular response to cytokine stimulus	5	2.28068	PID1, IL18RAP, CXCR4, HCLS1, CSF1R
	GO:0060907	positive regulation of macrophage cytokine production	3	1.01254	SEMA7A, GPRC5B, CD74		GO:0050718	positive regulation of interleukin-1 beta secretion	5	2.28068	HMGB1, P2RX7, NOD2, CCL3, LGALS9
	GO:0001818	negative regulation of cytokine production	3	1.01254	SLC11A1, NDRG2, GPNMB		GO:0034113	heterotypic cell-cell adhesion	5	2.28068	LILRB2, ITGAX, ITGB7, CD2, ITGB2
	GO:0006032	chitin catabolic process	3	1.01254	CHIA, CHI3L1, CHI3L2		GO:0090023	positive regulation of neutrophil chemotaxis	5	2.28068	C3AR1, C5AR1, RAC2, NCKAP1L, CD74
	GO:0008366	axon ensheathment	3	1.01254	PLP1, CLDN11, POU3F1		GO:0034341	response to interferon-gamma	5	2.14099	SLC11A1, KYNU, BST2, CXCL16, SNCA
	GO:0010642	negative regulation of platelet-derived growth factor receptor signaling pathway	3	1.01254	SNCA, SLC9A3R1, ADIPOQ		GO:0045671	negative regulation of osteoclast differentiation	5	2.14099	CCL3, MAFB, LILRB3, TLR4, INPP5D
	yellow						GO:0001816	cytokine production	5	2.07647	PIK3CG, LIPA, PIK3CD, CD4, PTAFR
	GO:0045944	positive regulation of transcription from RNA polymerase II promoter	35	6.53954	NAMPT, SPI1, FSTL3, NFKBIA, FOXO4, YBX1, FOS, SQSTM1, SERPINE1, IL1B, ETV6, TCF4, TNIP1, MYC, NR1H3, CYR61, IL6, ARHGEF2, CEBPB, NUCKS1, SMAD7, CEBPD, RXRB, CCNL1, FOSB, NCL, JUNB, OSM, ATF5, JUN, HIPK2, PPRC1, PAF1, KLF2, KLF4		GO:0032735	positive regulation of interleukin-12 production	5	2.07647	HMGB1, CD36, IRF8, RIPK2, TLR4
	GO:0000122	negative regulation of transcription from RNA polymerase II promoter	18	1.78367	SMAD7, SPI1, TLE1, FOSB, YBX1, JUNB, CRY2, BTG2, DRAP1, SQSTM1, HIPK2, PAF1, ETV6, NFIL3, TCF4, MYC, KLF4, NR1H3		GO:0030041	actin filament polymerization	5	2.01512	AIF1, PREX1, HCLS1, CORO7, WAS
	GO:0043066	negative regulation of apoptotic process	17	3.3818	IER3, IL6, SOCS2, MCL1, SOCS3, PIM1, NFKBIA, ATF5, PA2G4, DUSP1, SQSTM1, PHB2, HSPB1, GRK5, MYC, ARHGDIA, CYR61		GO:0032757	positive regulation of interleukin-8 production	5	2.01512	NOD2, IL1B, TLR4, TLR5, TLR7
	GO:0008285	negative regulation of cell proliferation	16	3.53984	B4GALT1, IL6, PTGS2, FOXO4, SLIT3, OSM, ATF5, BTG2, JUN, IL1B, ADAMTS1, NDRG1, IGFBP3, KLF4, TOB1, DPT		GO:0070328	triglyceride homeostasis	5	2.01512	LPL, APOE, APOC2, SCARB1, NR1H3
	GO:0006366	transcription from RNA polymerase II promoter	16	2.42283	CEBPB, NUCKS1, CEBPD, SPI1, FOSB, FOXO4, YBX1, JUNB, SALL3, ATF5, FOS, JUN, ETV6, NFIL3, MYC, KLF4		GO:0032728	positive regulation of interferon-beta production	5	1.95666	HMGB1, IFIH1, IRF1, RIPK2, TLR4
	GO:0001525	angiogenesis	14	5.01925	SAT1, COL4A2, CCL2, SRPX2, PTGS2, TNFRSF12A, ITGA5, JUN, HMOX1, SERPINE1, APOLD1, RHOB, NCL, THY1		GO:0050690	regulation of defense response to virus by virus	5	1.90088	DOCK2, HCK, CD247, CD4, CD28
	GO:0042493	response to drug	13	3.09063	FOS, IL6, ASS1, PTGS2, JUN, ATP1A1, RPN2, FOSB, IGFBP2, MYC, JUNB, NNMT, DUSP6		GO:0032689	negative regulation of interferon-gamma production	5	1.90088	HAVCR2, HMGB1, HLA-DRB4, TLR4, LGALS9
	GO:0006955	immune response	13	1.95581	OSM, IL1R1, TNFRSF1B, IL6, CCL2, CEBPB, IFITM3, CXCL2, IL1B, GEM, HLA-E, NFIL3, TNFAIP1		GO:0002376	immune system process	5	1.84757	KCNN4, CADM1, CD300A, CD300LF, CD300C
	GO:0007155	cell adhesion	13	1.68116	B4GALT1, CCL2, TNC, CD99, COL5A1, THY1, ITGBL1, ITGA5, RHOB, LAMB1, THBS3, CYR61, DPT		GO:0043491	protein kinase B signaling	5	1.65578	CCL3, CCL2, IL1B, CCL5, MERTK
	GO:0045892	negative regulation of transcription, DNA-templated	13	1.4455	ATF5, PA2G4, CRY2, CEBPB, CEBPD, PHB2, JUN, SPI1, FABP4, TLE1, RASD1, KLF4, DEDD2		GO:0006641	triglyceride metabolic process	5	1.57086	LPL, ACSL1, APOE, APOC1, GK
	GO:0045893	positive regulation of transcription, DNA-templated	13	1.35774	KLF6, IL6, SPI1, ATF5, FOS, JUN, HIPK2, IL1B, KLF2, TCF4, MYC, KLF4, NR1H3		GO:0050918	positive chemotaxis	5	1.57086	HMGB1, CORO1A, CCL3, CCL5, GPNMB
	GO:0006412	translation	12	3.21858	RPS28, RPS19, RPL23, RPL14, RPL13A, SARS, RPL3, SLC25A44, RPL11, RPL7A, MRPL32, TNIP1		GO:0010043	response to zinc ion	5	1.53076	VCAM1, P2RX7, HAMP, CA2, SOD2
	GO:0043065	positive regulation of apoptotic process	12	2.62327	IL6, ARHGEF2, DUSP1, PTGS2, TNFRSF12A, SQSTM1, HMOX1, RHOB, GADD45B, DCUN1D3, IGFBP3, DUSP6		GO:0042157	lipoprotein metabolic process	5	1.45482	LPL, APOE, APOC1, APOC2, SCARB1
	GO:0006364	rRNA processing	11	3.21197	PA2G4, RPS28, RPS19, RPL23, RPL14, RPL13A, RRP7A, RPL3, RPL11, RPL7A, LTV1		GO:0008219	cell death	5	1.41883	HMOX1, RGS19, PARP4, EMP3, MAP3K11
	GO:0098609	cell-cell adhesion	11	2.45029	VASN, PPME1, RPL14, EIF4H, PDLIM1, NDRG1, DNAJB1, RPL7A, EHD1, SH3GL1, ADD1		GO:1901215	negative regulation of neuron death	5	1.38406	APOE, SNCA, SORL1, GPNMB, GBA
	GO:0008283	cell proliferation	11	1.5973	OSM, ZFP36L2, BLZF1, PA2G4, BST2, PIM1, VTI1B, MYC, EMP1, DDIT4, CYR61		GO:0045071	negative regulation of viral genome replication	5	1.38406	ISG15, BST2, FAM111A, OAS3, CCL5
	GO:0006413	translational initiation	10	4.03088	RPS28, RPS19, RPL23, RPL14, RPL13A, EIF4H, RPL3, RPL11, EIF1, RPL7A		GO:0032497	detection of lipopolysaccharide	4	3.86285	LY96, SCARB1, TLR4, TREM2
	GO:0007568	aging	10	3.42507	FOS, TNFRSF1B, IL6, CCL2, ASS1, JUN, SERPING1, RPN2, IGFBP2, FOXO4		GO:0071447	cellular response to hydroperoxide	4	3.47565	CD36, AIF1, PRKCD, TP53INP1
	GO:0000165	MAPK cascade	10	2.05909	DUSP5, PSMB5, CCL2, PSME2, CALM3, IL1B, HBEGF, PEBP1, MYC, DUSP6		GO:0002503	peptide antigen assembly with MHC class II protein complex	4	3.47565	HLA-DRB4, HLA-DMB, HLA-DMA, HLA-DRA
	GO:0032870	cellular response to hormone stimulus	9	6.90402	FOS, DUSP1, SOCS2, JUN, FOSB, IGFBP2, SIK1, JUNB, SLIT3		GO:0043305	negative regulation of mast cell degranulation	4	2.95302	CD84, CD300A, HMOX1, LGALS9
	GO:0000184	nuclear-transcribed mRNA catabolic process, nonsense-mediated decay	9	3.71005	PPP2R1A, RPS28, RPS19, RPL23, RPL14, RPL13A, RPL3, RPL11, RPL7A		GO:0010818	T cell chemotaxis	4	2.7596	PIK3CG, CCL3, CXCL16, PIK3CD
	GO:0042127	regulation of cell proliferation	9	2.46584	SAT1, TNFRSF1B, ARHGEF2, JUN, TNC, CXCL2, NFKBIA, NDRG1, JUNB		GO:0043304	regulation of mast cell degranulation	4	2.7596	RAC2, LYN, STXBP2, FES
	GO:0030198	extracellular matrix organization	9	2.31526	B4GALT1, COL4A2, COL4A1, ITGA5, TNC, SERPINE1, LAMB1, COL5A1, CYR61		GO:0050764	regulation of phagocytosis	4	2.59418	FGR, HCK, SCARB1, SYK
	GO:0010628	positive regulation of gene expression	9	1.60869	IL6, LDLR, TNC, IL1B, TLE1, HSPA1B, NFIL3, MYC, KLF4		GO:1900017	positive regulation of cytokine production involved in inflammatory response	4	2.59418	NOD2, GBP5, GPSM3, CD6
	GO:0009612	response to mechanical stimulus	8	4.88764	INHBB, CCL2, BTG2, JUN, TNC, FOSB, IGFBP2, JUNB		GO:0046641	positive regulation of alpha-beta T cell proliferation	4	2.59418	RIPK2, EBI3, SYK, CD28
	GO:0006614	SRP-dependent cotranslational protein targeting to membrane	8	3.58166	RPS28, RPS19, RPL23, RPL14, RPL13A, RPL3, RPL11, RPL7A		GO:0002281	macrophage activation involved in immune response	4	2.59418	HAVCR2, HMGB1, SYK, TYROBP
	GO:0006469	negative regulation of protein kinase activity	8	3.44336	IL6, SOCS2, SOCS3, HSPB1, FABP4, GADD45B, TRIB1, THY1		GO:0090197	positive regulation of chemokine secretion	4	2.59418	LPL, ALOX15B, IL4R, CSF1R
	GO:0071356	cellular response to tumor necrosis factor	8	3.167	ZFP36L2, IL6, ARHGEF2, CCL2, ASS1, FABP4, SNRNP70, KLF2		GO:0001771	immunological synapse formation	4	2.44993	DOCK2, CORO1A, DOCK8, CD6
	GO:0019083	viral transcription	8	3.12041	RPS28, RPS19, RPL23, RPL14, RPL13A, RPL3, RPL11, RPL7A		GO:2000406	positive regulation of T cell migration	4	2.44993	CCL20, AIF1, TNFRSF14, CCL5
	GO:0071222	cellular response to lipopolysaccharide	8	3.09749	TNFRSF1B, IL6, CCL2, CEBPB, ASS1, SERPINE1, PAF1, NR1H3		GO:0010759	positive regulation of macrophage chemotaxis	4	2.32227	C3AR1, CCL2, C5AR1, CCL5
	GO:0042981	regulation of apoptotic process	8	1.61562	NME4, INHBB, TNFRSF1B, MCL1, DUSP1, NDRG1, IGFBP3, DEDD2		GO:0043306	positive regulation of mast cell degranulation	4	2.32227	FGR, IL4R, FCER1G, SYK
	GO:0048661	positive regulation of smooth muscle cell proliferation	7	3.83972	NAMPT, IL6, PTGS2, JUN, HMOX1, HBEGF, MYC		GO:0050707	regulation of cytokine secretion	4	2.32227	LYN, TLR1, TLR4, TLR5
	GO:0007623	circadian rhythm	7	3.3073	ATF5, NAMPT, CRY2, JUN, HEBP1, SERPINE1, NFIL3		GO:0033628	regulation of cell adhesion mediated by integrin	4	2.32227	PIK3CG, LPXN, LYN, PLAU
	GO:0030336	negative regulation of cell migration	7	2.76785	BST2, SMAD7, SERPINE1, RHOB, STC1, ARHGDIA, THY1		GO:0009313	oligosaccharide catabolic process	4	2.32227	GM2A, NEU1, MAN2B1, MANBA
	GO:0071456	cellular response to hypoxia	7	2.7446	VASN, PTGS2, HMOX1, HIPK2, PINK1, STC1, NDRG1		GO:0045779	negative regulation of bone resorption	4	2.20795	P2RX7, INPP5D, CSK, TNFAIP3
	GO:0006979	response to oxidative stress	7	2.44758	PSMB5, DUSP1, PTGS2, HMOX1, PINK1, PDLIM1, SRXN1		GO:0009268	response to pH	4	2.20795	ARSA, CA2, CLCN7, GBA
	GO:0043524	negative regulation of neuron apoptotic process	7	2.0666	CCL2, CEBPB, BTG2, JUN, HMOX1, HIPK2, PINK1		GO:0032727	positive regulation of interferon-alpha production	4	2.20795	HMGB1, IFIH1, RIPK2, TLR4
	GO:0032496	response to lipopolysaccharide	7	1.64429	FOS, THBD, PTGS2, JUN, CXCL2, JUNB, TRIB1		GO:0045780	positive regulation of bone resorption	4	2.10461	CA2, ADAM8, SPP1, SYK
	GO:0045429	positive regulation of nitric oxide biosynthetic process	6	3.58957	IL6, ASS1, PTGS2, IL1B, KLF2, KLF4		GO:0051770	positive regulation of nitric-oxide synthase biosynthetic process	4	2.10461	NOD2, CCL2, CCL20, TLR4
	GO:0051591	response to cAMP	6	3.45014	FOS, THBD, DUSP1, JUN, FOSB, JUNB		GO:0001817	regulation of cytokine production	4	2.10461	CD83, LITAF, LYN, CSK
	GO:0045444	fat cell differentiation	6	2.53662	INHBB, TMEM120A, ATF5, CEBPD, GRK5, KLF4		GO:0045579	positive regulation of B cell differentiation	4	2.01045	NCKAP1L, INPP5D, SYK, BTK
	GO:0032355	response to estradiol	6	2.12932	DUSP1, SOCS2, ASS1, PTGS2, IGFBP2, MYC		GO:0071354	cellular response to interleukin-6	4	2.01045	PID1, CCL2, HAMP, CAMP
	GO:0051091	positive regulation of sequence-specific DNA binding transcription factor activity	6	1.87662	IL6, PHB2, HIPK2, PPRC1, IL1B, PINK1		GO:0042554	superoxide anion generation	4	2.01045	CYBA, CYBB, NCF2, SOD2
	GO:0045766	positive regulation of angiogenesis	6	1.72133	HMOX1, HIPK2, SERPINE1, RHOB, HSPB1, IL1B		GO:0006825	copper ion transport	4	1.92411	SLC11A2, FKBP4, SLC31A2, SCO2
	GO:0051092	positive regulation of NF-kappaB transcription factor activity	6	1.4826	IL6, ARHGEF2, NFKBIA, IL1B, HSPA1B, TERF2IP		GO:0034375	high-density lipoprotein particle remodeling	4	1.92411	APOE, APOC1, SCARB1, PLTP
	GO:0000188	inactivation of MAPK activity	5	3.5046	DUSP5, PPP2R1A, DUSP1, DUSP14, DUSP6		GO:0010744	positive regulation of macrophage derived foam cell differentiation	4	1.84447	LPL, CD36, ALOX15B, PRKCH
	GO:0045597	positive regulation of cell differentiation	5	2.84118	PA2G4, SOCS3, JUN, JUNB, CYR61		GO:0032722	positive regulation of chemokine production	4	1.77068	HAVCR2, RIPK2, TLR4, TLR7
	GO:0034097	response to cytokine	5	2.296	FOS, MCL1, JUN, DDOST, JUNB		GO:0030225	macrophage differentiation	4	1.702	CEBPA, MMP9, SPI1, CSF1R
	GO:0070373	negative regulation of ERK1 and ERK2 cascade	5	2.12776	DUSP1, CNKSR3, TNIP1, KLF4, DUSP6		GO:0070266	necroptotic process	4	1.702	LY96, RIPK3, TLR4, CD14
	GO:0071407	cellular response to organic cyclic compound	5	2.10175	CCL2, CEBPB, NFKBIA, IL1B, ARHGDIA		GO:0031668	cellular response to extracellular stimulus	4	1.702	ASGR1, P2RX7, LYN, AIF1
	GO:0043433	negative regulation of sequence-specific DNA binding transcription factor activity	5	2.07625	SMAD7, PHB2, HMOX1, PIM1, TRIB1		GO:0019370	leukotriene biosynthetic process	4	1.57775	ALOX5AP, LTA4H, ALOX5, SYK
	GO:0071300	cellular response to retinoic acid	5	1.84661	CCL2, TNC, SNRNP70, MYC, KLF4		GO:0032753	positive regulation of interleukin-4 production	4	1.57775	HAVCR2, SASH3, LGALS9, CD28
	GO:0071347	cellular response to interleukin-1	5	1.82588	IL6, CCL2, CEBPB, KLF2, MYC		GO:0042346	positive regulation of NF-kappaB import into nucleus	4	1.52125	IL1B, TLR4, TLR7, LGALS9
	GO:0050729	positive regulation of inflammatory response	5	1.78547	CCL2, LDLR, SERPINE1, FABP4, TNIP1		GO:0043171	peptide catabolic process	4	1.46801	CNDP2, TPP1, ANPEP, LTA4H
	GO:0001558	regulation of cell growth	5	1.65421	BLZF1, SOCS2, IGFBP2, IGFBP3, CYR61		GO:0001836	release of cytochrome c from mitochondria	4	1.41772	BOK, BCL2A1, IFI6, SOD2
	GO:0007565	female pregnancy	5	1.50537	NAMPT, FOS, THBD, FOSB, IGFBP2		GO:0051602	response to electrical stimulus	4	1.37012	P2RX7, AIF1, CD14, SOD2
	GO:0007179	transforming growth factor beta receptor signaling pathway	5	1.46001	FOS, CCL2, SMAD7, JUN, HIPK2		GO:0002291	T cell activation via T cell receptor contact with antigen bound to MHC molecule on antigen presenting cell	3	2.50112	ICAM1, ITGAL, APBB1IP
	GO:0043488	regulation of mRNA stability	5	1.30896	PSMB5, ZFP36L2, PSME2, HSPB1, HSPA1B		GO:0071224	cellular response to peptidoglycan	3	2.50112	CAMP, RIPK2, TREM2
	GO:0071549	cellular response to dexamethasone stimulus	4	2.1787	IL6, CCL2, ASS1, DDIT4		GO:0043372	positive regulation of CD4-positive, alpha-beta T cell differentiation	3	2.20963	CD83, NCKAP1L, SASH3
	GO:0048662	negative regulation of smooth muscle cell proliferation	4	2.1787	HMOX1, IGFBP3, KLF4, TRIB1		GO:0002283	neutrophil activation involved in immune response	3	2.20963	FCER1G, SYK, TYROBP
	GO:0097421	liver regeneration	4	2.1787	CEBPB, HMOX1, NFKBIA, MYC		GO:0034154	toll-like receptor 7 signaling pathway	3	2.20963	HAVCR2, PIK3AP1, TLR7
	GO:0050873	brown fat cell differentiation	4	2.05869	CEBPB, RGS2, PTGS2, FABP4		GO:0070574	cadmium ion transmembrane transport	3	2.20963	SLC11A2, SLC11A1, SLC39A8
	GO:0032570	response to progesterone	4	1.82281	FOS, CCL2, FOSB, NR1H3		GO:0072672	neutrophil extravasation	3	2.20963	PIK3CG, PIK3CD, TREM1
	GO:0030218	erythrocyte differentiation	4	1.79316	RPS19, HIPK2, SPI1, ADD1		GO:0045833	negative regulation of lipid metabolic process	3	2.20963	APOC1, APOC2, IL1B
	GO:0030514	negative regulation of BMP signaling pathway	4	1.65693	SMAD7, HIPK2, FSTL3, TOB1		GO:1900227	positive regulation of NLRP3 inflammasome complex assembly	3	1.9973	CD36, GBP5, TLR4
	GO:0071560	cellular response to transforming growth factor beta stimulus	4	1.56028	ZFP36L2, COL4A2, SMAD7, SNRNP70		GO:0042531	positive regulation of tyrosine phosphorylation of STAT protein	3	1.9973	LYN, HCLS1, CCL5
	GO:0014070	response to organic cyclic compound	4	1.56028	NAMPT, BTG2, EPHX1, DUSP6		GO:0034134	toll-like receptor 2 signaling pathway	3	1.8307	RIPK2, PIK3AP1, LGALS9
	GO:0071277	cellular response to calcium ion	4	1.51543	FOS, JUN, FOSB, JUNB		GO:0002819	regulation of adaptive immune response	3	1.8307	CD48, RIPK3, IRF1
	GO:0070301	cellular response to hydrogen peroxide	4	1.39273	IL6, RHOB, KLF2, KLF4		GO:0034382	chylomicron remnant clearance	3	1.8307	APOE, APOC1, APOC2
	GO:0071346	cellular response to interferon-gamma	4	1.39273	CCL2, ASS1, RPL13A, MYC		GO:0034384	high-density lipoprotein particle clearance	3	1.8307	APOE, APOC2, SCARB1
	GO:0045669	positive regulation of osteoblast differentiation	4	1.33718	IL6, CEBPB, CEBPD, CYR61		GO:0019262	N-acetylneuraminate catabolic process	3	1.8307	RENBP, NPL, NAGK
	GO:0006950	response to stress	4	1.31942	SQSTM1, PINK1, EIF1, GADD45B		GO:0072678	T cell migration	3	1.69404	CCL20, ITGB7, MYO1G
	GO:0060395	SMAD protein signal transduction	4	1.30203	INHBB, FOS, JUN, HIPK2		GO:0034351	negative regulation of glial cell apoptotic process	3	1.69404	CCL2, PRKCH, PRKCD
	GO:0016525	negative regulation of angiogenesis	4	1.30203	COL4A2, CCL2, TCF4, FOXO4		GO:0002606	positive regulation of dendritic cell antigen processing and presentation	3	1.69404	SLC11A1, NOD2, CD74
	GO:0071409	cellular response to cycloheximide	3	3.27835	KLF2, MYC, KLF4		GO:0001818	negative regulation of cytokine production	3	1.69404	SLC11A1, GPNMB, BTK
	GO:0034383	low-density lipoprotein particle clearance	3	2.32748	LDLR, HMOX1, EHD1		GO:0034372	very-low-density lipoprotein particle remodeling	3	1.69404	LPL, APOE, APOC2
	GO:0071499	cellular response to laminar fluid shear stress	3	2.32748	ASS1, KLF2, KLF4		GO:0060907	positive regulation of macrophage cytokine production	3	1.69404	CD36, TLR4, CD74
	GO:0035313	wound healing, spreading of epidermal cells	3	2.22215	ITGA5, HBEGF, COL5A1		GO:0010886	positive regulation of cholesterol storage	3	1.69404	LPL, CD36, SCARB1
	GO:0010941	regulation of cell death	3	2.04572	JUN, HSPA1B, JUNB		GO:0050869	negative regulation of B cell activation	3	1.69404	TBC1D10C, TNFAIP3, SAMSN1
	GO:0019725	cellular homeostasis	3	1.97035	CCL2, MCL1, DEDD2		GO:0045410	positive regulation of interleukin-6 biosynthetic process	3	1.57854	TLR1, IL1B, PTAFR
	GO:0014912	negative regulation of smooth muscle cell migration	3	1.83845	SERPINE1, IGFBP3, TRIB1		GO:0001913	T cell mediated cytotoxicity	3	1.57854	MICB, CADM1, CTSC
	GO:0010801	negative regulation of peptidyl-threonine phosphorylation	3	1.83845	SMAD7, CALM3, DDIT4		GO:0045059	positive thymic T cell selection	3	1.57854	DOCK2, CD3D, CD74
	GO:0010875	positive regulation of cholesterol efflux	3	1.83845	NFKBIA, PLTP, NR1H3		GO:0042119	neutrophil activation	3	1.57854	PREX1, CCL5, PRKCD
	GO:0043122	regulation of I-kappaB kinase/NF-kappaB signaling	3	1.7801	SQSTM1, HSPB1, IL1B		GO:0050702	interleukin-1 beta secretion	3	1.57854	CD36, GBP5, TLR4
	GO:0032270	positive regulation of cellular protein metabolic process	3	1.7801	NFKBIA, KLF4, NR1H3		GO:0034128	negative regulation of MyD88-independent toll-like receptor signaling pathway	3	1.57854	LY96, TLR4, CD14
	GO:0035994	response to muscle stretch	3	1.7259	FOS, JUN, NFKBIA		GO:0034383	low-density lipoprotein particle clearance	3	1.57854	CD36, HMOX1, SCARB1
	GO:0042274	ribosomal small subunit biogenesis	3	1.7259	RPS28, RPS19, LTV1		GO:0035456	response to interferon-beta	3	1.4788	BST2, XAF1, STAT1
	GO:2000811	negative regulation of anoikis	3	1.67533	MCL1, ITGA5, TLE1		GO:1900027	regulation of ruffle assembly	3	1.4788	ICAM1, RCC2, RHOG
	GO:1901741	positive regulation of myoblast fusion	3	1.67533	FLOT1, EHD1, EHD2		GO:0034144	negative regulation of toll-like receptor 4 signaling pathway	3	1.4788	RAB7B, LYN, TNFAIP3
	GO:0051412	response to corticosterone	3	1.62796	FOS, CALM3, FOSB		GO:0050665	hydrogen peroxide biosynthetic process	3	1.4788	CYBA, CYBB, SOD2
	GO:0000028	ribosomal small subunit assembly	3	1.58343	RPS28, RPS19, RRP7A		GO:0043589	skin morphogenesis	3	1.4788	COL1A2, COL1A1, GBA
	GO:0046697	decidualization	3	1.54145	PTGS2, STC1, JUNB		GO:0060586	multicellular organismal iron ion homeostasis	3	1.4788	SLC11A2, SLC11A1, HAMP
	GO:1902895	positive regulation of pri-miRNA transcription from RNA polymerase II promoter	3	1.54145	FOS, JUN, SPI1		GO:0032060	bleb assembly	3	1.39128	P2RX7, EMP3, MYLK
	GO:0016239	positive regulation of macroautophagy	3	1.42838	SQSTM1, HMOX1, PINK1		GO:0042116	macrophage activation	3	1.39128	SLC11A1, TLR1, TLR4
	GO:0033137	negative regulation of peptidyl-serine phosphorylation	3	1.42838	SMAD7, CNKSR3, DDIT4		GO:0002430	complement receptor mediated signaling pathway	3	1.39128	C3AR1, FPR1, FPR3
	GO:0051090	regulation of sequence-specific DNA binding transcription factor activity	3	1.36189	FOS, JUN, HMOX1		GO:0033089	positive regulation of T cell differentiation in thymus	3	1.39128	ADAM8, IL7R, ADA
	GO:0015949	nucleobase-containing small molecule interconversion	3	1.36189	NME4, GUK1, GLRX		GO:0002675	positive regulation of acute inflammatory response	3	1.39128	PIK3CG, ALOX5AP, ADAM8
	GO:0032757	positive regulation of interleukin-8 production	3	1.33087	SERPINE1, IL1B, HSPA1B		GO:0032233	positive regulation of actin filament bundle assembly	3	1.31348	PLEK, SWAP70, SYNPO2
	GO:0035987	endodermal cell differentiation	3	1.30119	COL4A2, ITGA5, LAMB1		GO:0032495	response to muramyl dipeptide	3	1.31348	NOD2, CARD9, TNFAIP3
	GO:0032918	spermidine acetylation	2	1.40351	SAT1, SAT2		GO:0051279	regulation of release of sequestered calcium ion into cytosol	3	1.31348	CYBA, CORO1A, LYN
	GO:0071461	cellular response to redox state	2	1.40351	VASN, ARHGDIA		GO:0042535	positive regulation of tumor necrosis factor biosynthetic process	3	1.31348	CYBB, TLR1, TLR4
	GO:0032920	putrescine acetylation	2	1.40351	SAT1, SAT2		GO:0032703	negative regulation of interleukin-2 production	3	1.31348	HAVCR2, VSIG4, TNFAIP3
	GO:0046204	nor-spermidine metabolic process	2	1.40351	SAT1, SAT2		GO:0045060	negative thymic T cell selection	3	1.31348	DOCK2, CD74, CD28
	GO:1990646	cellular response to prolactin	2	1.40351	IL6, MYC		GO:0050732	negative regulation of peptidyl-tyrosine phosphorylation	3	1.31348	SEMA4D, SAMSN1, PRKCD
	GO:0009447	putrescine catabolic process	2	1.40351	SAT1, SAT2		GO:0002523	leukocyte migration involved in inflammatory response	3	1.31348	CCL2, ITGB2, ADAM8
	GO:0032919	spermine acetylation	2	1.40351	SAT1, SAT2
