# Supplementary material for: Identification of crucial genes in abdominal aortic aneurysm by WGCNA
Source: PeerJ. 2019 Oct 8;7:e7873. doi: 10.7717/peerj.7873 (PMC6788446; doi:10.7717/peerj.7873)
Supplement: Supplemental Information 8 [file peerj-07-7873-s008.xlsx]

## Sheet: Sheet1
Table S3 KEGG pathways for modules on AAA and normal condition
AAA	KEGG ID	KEGG pathway	Count	-logP	Genes	Normal	KEGG ID	KEGG pathway	Count	-logP	Genes
	black						brown
	hsa04640	Hematopoietic cell lineage	14	11.1706	CR2, CD8A, CD3D, CD3E, FCER2, IL7R, CD38, CD37, CD19, CD2, GP1BA, CD4, CD24, CD7		hsa04151	PI3K-Akt signaling pathway	14	2.22454	EFNA1, IGF1, GNG11, GNG12, LAMA2, VWF, TEK, RELN, NOS3, NGFR, MYC, ANGPT2, IL3RA, THBS4
	hsa04060	Cytokine-cytokine receptor interaction	13	4.9217	IL2RB, CCR7, CXCR5, CXCR4, CXCL13, IL10RA, TNFRSF13B, TNFRSF13C, TNFRSF17, IL7R, LTB, CD27, LTA		hsa05166	HTLV-I infection	10	1.52325	EGR1, ADCY4, ADCY1, MSX1, ETS1, RAN, PPP3R1, HLA-A, SMAD3, MYC
	hsa05340	Primary immunodeficiency	11	11.8067	CD19, CD3D, CD8A, CD3E, ICOS, TNFRSF13B, TNFRSF13C, CD4, CD79A, IL7R, ADA		hsa04015	Rap1 signaling pathway	9	1.561	ADCY4, ADCY1, ID1, EFNA1, TEK, IGF1, NGFR, ANGPT2, CRK
	hsa04514	Cell adhesion molecules (CAMs)	11	5.5153	HLA-DQB1, ITGAL, CD8A, SELL, ICOS, ITGB7, ICAM3, CD2, CD4, CD6, HLA-DOB		hsa04014	Ras signaling pathway	9	1.39884	ETS1, EFNA1, TEK, PLA2G2A, IGF1, GNG11, NGFR, GNG12, ANGPT2
	hsa05166	HTLV-I infection	10	2.74185	HLA-DQB1, ITGAL, IL2RB, CD3D, CD3E, TNFRSF13C, CDC20, TCF3, HLA-DOB, LTA		hsa04514	Cell adhesion molecules (CAMs)	8	1.96567	SELP, CD34, ICAM2, CLDN5, HLA-A, CLDN11, JAM2, CDH5
	hsa04662	B cell receptor signaling pathway	9	6.12938	CARD11, CD19, CR2, RAC2, PLCG2, CD79B, INPP5D, CD79A, CD72		hsa04270	Vascular smooth muscle contraction	7	1.82416	RAMP3, RAMP2, AGTR1, ADCY4, ADCY1, PLA2G2A, ITPR1
	hsa04660	T cell receptor signaling pathway	9	4.90101	ITK, CARD11, CD3D, CD8A, FYN, CD3E, ICOS, CD247, CD4		hsa04360	Axon guidance	7	1.66539	SEMA6A, SEMA3G, EFNA1, EFNB2, PPP3R1, EPHB4, SLIT3
	hsa04672	Intestinal immune network for IgA production	8	6.17389	HLA-DQB1, CXCR4, ICOS, ITGB7, TNFRSF13B, TNFRSF13C, TNFRSF17, HLA-DOB		hsa03010	Ribosome	7	1.53685	RPL30, RPLP0, RPL15, RPL12, RPS2, RPS3, MRPL20
	hsa04650	Natural killer cell mediated cytotoxicity	7	2.66046	CD48, ITGAL, SH2D1A, RAC2, FYN, PLCG2, CD247		hsa04713	Circadian entrainment	6	1.63345	ADCY4, ADCY1, GNG11, GNG12, RASD1, ITPR1
	hsa04062	Chemokine signaling pathway	7	1.78319	ITK, CCR7, CXCR5, RAC2, CXCR4, CXCL13, GNG7		hsa04724	Glutamatergic synapse	6	1.33961	ADCY4, ADCY1, PPP3R1, GNG11, GNG12, ITPR1
	hsa04064	NF-kappa B signaling pathway	6	2.57973	CARD11, PLCG2, TNFRSF13C, BIRC3, LTB, LTA		hsa04924	Renin secretion	5	1.62451	AGTR1, AGT, PPP3R1, AQP1, ITPR1
	hsa05169	Epstein-Barr virus infection	6	1.96016	HLA-DQB1, ITGAL, CD19, CR2, FCER2, PLCG2		cyan
	hsa05162	Measles	6	1.81017	IL2RB, SH2D1A, CD3D, FYN, CD3E, SLAMF1		hsa01100	Metabolic pathways	61	3.29744	SGSH, ATP5D, LDHA, GNPDA1, UQCRC1, B3GALT6, B3GALT4, AMT, ATP6AP1, QARS, ACOX3, GSS, NDUFS7, NANS, GOT1, NT5C2, SPR, RPN2, NDUFS3, ITPK1, DDOST, IDUA, SGPL1, PDXK, NADSYN1, NDUFA13, PIGT, PISD, PIGQ, ATP6V1D, LAP3, MGAT1, ADSL, ACAA1, POLR2H, NAGLU, SRM, HMGCS1, UROS, TYMS, MTHFS, GALK1, TPI1, ENO2, IDH2, PAFAH1B3, GAPDH, ENO1, B4GALT1, SHMT2, ATP5J2, NDUFA9, COX8A, TKT, B3GAT3, NDUFV1, POLD1, UC…
	hsa05416	Viral myocarditis	5	2.4571	HLA-DQB1, ITGAL, RAC2, FYN, HLA-DOB		hsa01130	Biosynthesis of antibiotics	15	2.00792	LDHA, SHMT2, AMT, HMGCS1, TKT, AMDHD2, TPI1, GOT1, ENO2, IDH2, ADSL, IDI1, GAPDH, ACAA1, ENO1
	hsa04670	Leukocyte transendothelial migration	5	1.42131	ITK, ITGAL, RAC2, CXCR4, PLCG2		hsa04142	Lysosome	14	3.80836	SGSH, GNPTG, CTSZ, NAGLU, PSAP, ATP6AP1, LAMP1, CTSK, SUMF1, SORT1, MCOLN1, GGA2, IDUA, CTSF
	hsa04664	Fc epsilon RI signaling pathway	4	1.40975	RAC2, FYN, PLCG2, INPP5D		hsa05010	Alzheimer's disease	13	2.04093	ATP5D, UQCRC1, NDUFA9, APH1B, COX8A, NDUFA13, NCSTN, NDUFS7, LRP1, NDUFV1, CALM3, NDUFS3, GAPDH
	blue						hsa04510	Focal adhesion	13	1.41604	COL4A2, MYL5, TNC, PPP1R12C, COL3A1, ITGA10, COL5A1, LAMA4, CCND1, COMP, COL6A3, COL6A1, PAK1
	hsa03010	Ribosome	51	14.988	RPL17, RPL19, RPL15, RPS2, RPS3, RPS3A, RPLP0, RPLP1, RPL12, MRPL33, MRPL34, RPS27A, RPL36AL, RPL35A, MRPS6, RPS18, MRPS9, RPS17, RPS14, RPS12, RPS4Y1, RPS13, MRPS17, RPL27A, RPS15A, RPL39, MRPL20, RPS25, MRPL13, RPL30, RPL7, MRPL15, RPS29, RPL31, RPL9, MRPL17, MRPL18, RPL5, RPL10A, RSL24D1, RPL4, RPS21, RPS23, RPL26, RPS9, RPL27, RPL23A, RPL24, RPS5, MRPL24, RPL22		hsa00190	Oxidative phosphorylation	11	1.92416	ATP5D, NDUFS7, ATP5J2, UQCRC1, NDUFA9, ATP6AP1, NDUFV1, COX8A, NDUFA13, NDUFS3, ATP6V1D
	hsa04151	PI3K-Akt signaling pathway	51	1.6686	HSP90AB1, NFKB1, RPS6KB1, PTEN, PDGFC, PIK3AP1, PDGFD, GHR, SYK, PIK3CG, RBL2, CDK4, CCND1, CCND3, LPAR5, CCND2, COL1A2, PDGFRA, PDGFRB, PPP2R5E, LAMC1, IBSP, COL3A1, GNG11, CDC37, LAMB2, ITGAV, COL6A3, TEK, THBS1, THBS2, THBS4, CSF1R, PIK3R2, MAP2K2, IGF1, RAF1, COL5A2, EIF4B, LAMA2, VWF, LAMA4, YWHAG, HSP90B1, YWHAH, CDKN1B, YWHAQ, RHEB, JAK2, EIF4E2, PPP2R3C		hsa03018	RNA degradation	9	2.44591	EXOSC6, DCP2, EXOSC7, SKIV2L, PABPC4, ENO2, LSM4, LSM3, ENO1
	hsa05166	HTLV-I infection	47	3.46845	ADCY3, ADCY4, TSPO, HLA-DRB3, PPP3R1, TGFB3, NFKB1, PTTG2, TRRAP, HLA-DMB, HLA-DMA, CANX, SRF, VCAM1, POLE4, XBP1, POLE3, MAP3K1, SLC2A1, HLA-DRB4, HLA-DRB5, HLA-DPB1, HLA-DOA, PIK3R2, PIK3CG, EGR1, EGR2, SLC25A5, ANAPC4, HLA-A, SMAD4, SMAD3, HLA-B, CDC26, CDK4, FZD4, HLA-F, CCND1, CCND3, CCND2, ETS1, ETS2, PDGFRA, PDGFRB, HLA-DPA1, HLA-DRA, TP53INP1		hsa04512	ECM-receptor interaction	9	2.12369	COL4A2, LAMA4, COMP, TNC, COL3A1, COL6A3, ITGA10, COL6A1, COL5A1
	hsa05016	Huntington's disease	42	4.80321	UQCRC2, NDUFB3, POLR2G, NDUFB5, POLR2F, NDUFB6, NDUFB7, NDUFB8, AP2S1, COX7B, NDUFAB1, UQCRFS1, COX5A, POLR2B, NDUFB2, TFAM, NDUFS5, COX6B1, ATP5H, AP2M1, NDUFB10, NDUFA3, COX7A2, NDUFA8, SLC25A5, NDUFA4L2, NDUFA9, COX8A, NDUFA13, SOD1, NDUFA1, DCTN4, NDUFA12, ITPR1, NDUFA11, HDAC2, HDAC1, NDUFV2, SDHD, ATP5C1, COX6A1, ATP5A1		hsa01200	Carbon metabolism	9	1.49431	SHMT2, TPI1, GOT1, AMT, ENO2, IDH2, TKT, GAPDH, ENO1
	hsa04144	Endocytosis	42	2.61085	VPS29, CAV1, CHMP5, AP2S1, CHMP4A, KIAA0196, SNX2, SNX4, HSPA1A, VPS37C, ASAP3, ARPC5, ARF5, CHMP2B, DAB2, FOLR2, ARPC3, VPS35, VPS36, AP2M1, EHD4, RAB8A, HLA-A, SMAD3, HLA-B, WAS, HLA-F, ARPC1A, ARPC1B, RAB31, CBLB, RAB11FIP3, TFRC, RABEP1, ARPC5L, CCDC53, RAB22A, PDGFRA, RAB10, BIN1, ARAP3, VPS26A		hsa01230	Biosynthesis of amino acids	8	2.0435	SHMT2, TPI1, GOT1, ENO2, IDH2, TKT, GAPDH, ENO1
	hsa04145	Phagosome	41	7.35102	ATP6V0E1, C3, HLA-DRB3, C1R, ATP6V1B2, HLA-DMB, HLA-DMA, CANX, ITGAM, FCGR1A, ITGAV, TAP1, HLA-DRB4, HLA-DRB5, HLA-DPB1, HLA-DOA, TUBA1A, THBS1, THBS2, TUBA1C, THBS4, NCF1, HLA-A, HLA-B, CTSS, M6PR, HLA-F, ATP6V1A, LAMP1, CYBA, LAMP2, ATP6V0E2, SEC61B, CD36, TFRC, CD209, HLA-DPA1, VAMP3, SEC61G, CD14, HLA-DRA		hsa04066	HIF-1 signaling pathway	8	1.42027	LTBR, TFRC, MAP2K2, ENO2, MKNK1, GAPDH, IFNGR1, ENO1
	hsa05010	Alzheimer's disease	38	4.70163	UQCRC2, NDUFB3, NDUFB5, NDUFB6, NDUFB7, NDUFB8, COX7B, PPP3R1, NDUFAB1, UQCRFS1, COX5A, NDUFB2, NDUFS5, APP, COX6B1, ATP5H, GAPDH, LPL, NDUFB10, NDUFA3, COX7A2, NDUFA8, NDUFA4L2, NDUFA9, COX8A, NDUFA13, ITPR3, NDUFA1, NDUFA12, ITPR1, NDUFA11, NCSTN, NDUFV2, SDHD, ATP5C1, COX6A1, ATP5A1, CALM1		hsa00670	One carbon pool by folate	4	1.57839	MTHFS, TYMS, SHMT2, AMT
	hsa01130	Biosynthesis of antibiotics	38	2.60314	BCAT1, LDHB, LDHA, ADPGK, ALDOC, PGD, HMGCS1, ACAT1, PDHB, FDFT1, TPI1, ATIC, CAT, RPIA, HADH, PAPSS1, GAPDH, PAPSS2, HSD17B7, ACAA2, ODC1, SHMT2, ACO2, ACO1, PFKP, TKT, AMPD1, PGLS, SDHD, PGM1, PLA2G7, ALDH2, PHGDH, PCYOX1, MDH2, ALDH9A1, MDH1, PRPS1		darkgreen
	hsa00190	Oxidative phosphorylation	37	6.85016	UQCRC2, NDUFB3, ATP6V0E1, NDUFB5, NDUFB6, NDUFB7, NDUFB8, COX7B, NDUFAB1, ATP6V1B2, UQCRFS1, COX5A, NDUFB2, NDUFS5, COX6B1, COX17, ATP5H, ATP5J2, NDUFB10, COX7A2, NDUFA3, NDUFA8, NDUFA4L2, NDUFA9, COX8A, NDUFA13, NDUFA1, NDUFA12, PPA1, NDUFA11, ATP6V1A, ATP6V0E2, NDUFV2, SDHD, ATP5C1, COX6A1, ATP5A1		hsa04060	Cytokine-cytokine receptor interaction	15	8.52487	CXCL5, CXCL2, TNFRSF17, TNFRSF4, CCL4, LEP, OSM, CCL22, CCR7, PPBP, CCL21, CXCL13, IL2RG, LTB, CD27
	hsa05012	Parkinson's disease	36	5.62942	UQCRC2, NDUFB3, NDUFB5, NDUFB6, SNCAIP, NDUFB7, NDUFB8, COX7B, UCHL1, NDUFAB1, UQCRFS1, COX5A, NDUFB2, NDUFS5, COX6B1, ATP5H, NDUFB10, COX7A2, NDUFA3, NDUFA8, SLC25A5, NDUFA4L2, NDUFA9, COX8A, UBE2J1, NDUFA13, NDUFA1, PARK7, NDUFA12, NDUFA11, NDUFV2, SDHD, ATP5C1, COX6A1, ATP5A1, UBB		hsa04062	Chemokine signaling pathway	9	4.05484	CCL22, CCR7, PPBP, CXCL5, CXCL13, CCL21, CXCL2, NFKBIA, CCL4
	hsa04932	Non-alcoholic fatty liver disease (NAFLD)	33	3.80943	UQCRC2, NDUFB3, NDUFB5, NDUFB6, NDUFB7, NDUFB8, COX7B, NDUFAB1, NFKB1, UQCRFS1, COX5A, NDUFB2, NDUFS5, XBP1, COX6B1, PIK3R2, CEBPA, PIK3CG, NDUFB10, COX7A2, NDUFA3, NDUFA8, NDUFA4L2, NDUFA9, COX8A, NDUFA13, NDUFA1, NDUFA12, NDUFA11, LEP, NDUFV2, SDHD, COX6A1		hsa05166	HTLV-I infection	7	1.85436	HLA-DQB1, EGR2, CD3E, LCK, NFKBIA, IL2RG, HLA-DOB
	hsa05152	Tuberculosis	32	2.29142	C3, HLA-DRB3, TGFB3, PPP3R1, NFKB1, HLA-DMB, HLA-DMA, ITGAM, MYD88, IL10RB, FCGR1A, HLA-DRB4, HLA-DRB5, HLA-DPB1, HLA-DOA, IFNGR1, SYK, HSPA9, IRAK1, CARD9, RAF1, CTSS, STAT1, LAMP1, LAMP2, CD209, CTSD, JAK2, HLA-DPA1, CD14, CALM1, HLA-DRA		hsa05340	Primary immunodeficiency	5	3.87907	CD19, CD3E, LCK, IL2RG, CD79A
	hsa05168	Herpes simplex infection	31	1.83316	HMGN1, IFIH1, C3, HLA-DRB3, HCFC1, NFKB1, HLA-DMB, CCL5, HLA-DMA, MYD88, TAP1, HLA-DRB4, HLA-DRB5, HLA-DPB1, HLA-DOA, IFNGR1, HLA-A, TNFRSF14, HLA-B, PPP1CC, STAT1, HLA-F, PTPN11, IRF9, TAF10, PPP1CA, C1QBP, JAK2, HLA-DPA1, EIF2AK2, HLA-DRA		hsa04662	B cell receptor signaling pathway	5	2.69674	CD19, CD22, NFKBIA, CD79B, CD79A
	hsa05205	Proteoglycans in cancer	31	1.3572	CAV1, LUM, MMP9, RPS6KB1, DCN, TIMP3, IQGAP1, GPC3, ITGAV, PPP1R12A, MSN, THBS1, PIK3R2, PIK3CG, MAP2K2, HCLS1, IGF1, RAF1, CD63, ITPR3, PPP1CC, DDX5, FLNB, FZD4, ITPR1, PTPN11, EIF4B, CCND1, PPP1CA, CBLB, PLAU		hsa04640	Hematopoietic cell lineage	5	2.33115	CD38, CD19, CD3E, FCER2, CD22
	hsa04141	Protein processing in endoplasmic reticulum	28	1.56849	HSP90AB1, DERL2, HSPA1A, UBQLN2, EDEM1, CANX, RBX1, SSR1, HSPH1, STT3A, XBP1, DNAJA1, RPN1, DAD1, TRAM1, DNAJA2, CKAP4, UBE2J1, BCAP31, HSP90B1, SEC61B, VCP, TXNDC5, EIF2AK2, SSR4, PPP1R15A, SEC61G, UBE2E2		hsa04064	NF-kappa B signaling pathway	5	2.33115	CCL21, LCK, NFKBIA, CCL4, LTB
	hsa04142	Lysosome	26	2.9329	LAPTM4B, CTSZ, LIPA, HEXB, PPT1, CTSS, CD63, M6PR, MANBA, SLC11A2, DNASE2, LAMP1, CTSK, LAMP2, NPC1, LAPTM5, NPC2, AP1S2, AP3M2, SUMF1, SORT1, CTSD, CTSB, SCARB2, CTSG, AP3B1		hsa04514	Cell adhesion molecules (CAMs)	5	1.60532	HLA-DQB1, SELL, ICAM3, CD22, HLA-DOB
	hsa04514	Cell adhesion molecules (CAMs)	25	1.71321	HLA-DRB3, CDH2, HLA-DMB, HLA-DMA, ITGAM, CDH5, ALCAM, VCAM1, ITGAV, HLA-DRB4, HLA-DRB5, HLA-DPB1, HLA-DOA, SELP, PTPRM, ICAM2, HLA-A, HLA-B, HLA-F, CLDN1, VCAN, HLA-DPA1, JAM2, JAM3, HLA-DRA		hsa05323	Rheumatoid arthritis	4	1.5029	HLA-DQB1, CXCL5, HLA-DOB, LTB
	hsa05150	Staphylococcus aureus infection	23	7.86665	SELP, C3AR1, CFB, C3, HLA-DRB3, FPR1, FPR3, C1R, HLA-DMB, HLA-DMA, C1QC, ITGAM, C1QB, FCGR1A, CFH, HLA-DRB4, HLA-DRB5, HLA-DPA1, HLA-DPB1, CFI, HLA-DOA, CFD, HLA-DRA		hsa04660	T cell receptor signaling pathway	4	1.36286	CD3E, LCK, NFKBIA, LCP2
	hsa05145	Toxoplasmosis	23	2.46278	IRAK1, LY96, HLA-DRB3, TGFB3, NFKB1, HSPA1A, HLA-DMB, STAT1, HLA-DMA, LAMA2, LAMA4, MYD88, LAMB2, IL10RB, HLA-DRB4, HLA-DRB5, HLA-DPA1, JAK2, HLA-DPB1, LAMC1, HLA-DOA, IFNGR1, HLA-DRA		hsa05310	Asthma	3	1.64084	FCER1A, HLA-DQB1, HLA-DOB
	hsa05169	Epstein-Barr virus infection	23	1.91849	PIK3CG, IRAK1, LYN, HLA-DRB3, HLA-A, NFKB1, HLA-B, HLA-F, HDAC2, PSMC5, CDKN1B, HDAC1, HLA-DRB4, HLA-DRB5, HLA-DPA1, HLA-DPB1, EIF2AK2, TNFAIP3, ENTPD1, PSMD7, SYK, PIK3R2, HLA-DRA		hsa05332	Graft-versus-host disease	3	1.56318	HLA-DQB1, GZMB, HLA-DOB
	hsa04110	Cell cycle	23	1.83904	RBL2, ANAPC13, ANAPC4, SMAD4, TGFB3, SMAD3, PTTG2, CDK4, MCM3, CDC26, RBX1, MCM6, CCND1, YWHAG, HDAC2, YWHAH, CDKN1B, CCND3, HDAC1, CCND2, YWHAQ, MAD2L2, TFDP1		hsa05330	Allograft rejection	3	1.47096	HLA-DQB1, GZMB, HLA-DOB
	hsa05162	Measles	23	1.51591	PIK3CG, IRAK1, IFIH1, RAB9A, NFKB1, HSPA1A, CDK4, STAT1, IRF9, PRKCQ, CCND1, TNFSF10, MYD88, CDKN1B, CCND3, CCND2, CD209, JAK2, MSN, EIF2AK2, TNFAIP3, IFNGR1, PIK3R2		hsa04940	Type I diabetes mellitus	3	1.37019	HLA-DQB1, GZMB, HLA-DOB
	hsa05140	Leishmaniasis	22	4.88005	IRAK1, NCF1, MARCKSL1, C3, HLA-DRB3, TGFB3, NFKB1, HLA-DMB, STAT1, HLA-DMA, ITGAM, CYBA, MYD88, FCGR1A, HLA-DRB4, HLA-DRB5, HLA-DPA1, JAK2, HLA-DPB1, HLA-DOA, IFNGR1, HLA-DRA		darkturquoise
	hsa01200	Carbon metabolism	22	1.99947	SHMT2, ACO2, ACO1, ADPGK, GLUD1, ALDOC, PGD, PFKP, TKT, ACAT1, PDHB, TPI1, PGLS, SDHD, PHGDH, CAT, RPIA, HIBCH, GAPDH, MDH2, MDH1, PRPS1		hsa04978	Mineral absorption	5	5.85659	SLC26A3, MT1M, MT1A, MT2A, MT1X
	hsa04612	Antigen processing and presentation	19	2.95627	HSP90AB1, HLA-DRB3, HLA-A, HSPA1A, HLA-B, CTSS, HLA-DMB, HLA-DMA, CANX, HLA-F, B2M, TAP1, HLA-DRB4, HLA-DRB5, HLA-DPA1, HLA-DPB1, CTSB, HLA-DOA, HLA-DRA		lightgreen
	hsa04666	Fc gamma R-mediated phagocytosis	19	2.43972	PIK3CG, LYN, MARCKSL1, NCF1, RAF1, RPS6KB1, ARPC5, ASAP3, WAS, ARPC1A, ARPC1B, ARPC3, FCGR1A, ARPC5L, CFL1, MARCKS, BIN1, SYK, PIK3R2		no significant results
	hsa05323	Rheumatoid arthritis	19	2.21556	ATP6V0E1, HLA-DRB3, TGFB3, ATP6V1B2, HLA-DMB, CCL5, HLA-DMA, CXCL12, ATP6V1A, CTSK, ATP6V0E2, TNFSF13B, TEK, HLA-DRB4, HLA-DRB5, HLA-DPA1, HLA-DPB1, HLA-DOA, HLA-DRA		lightyellow
	hsa04064	NF-kappa B signaling pathway	18	1.92209	IRAK1, CFLAR, LYN, LY96, CCL19, NFKB1, CXCL12, BTK, VCAM1, PRKCQ, CCL13, MYD88, TNFSF13B, CCL21, TNFAIP3, CD14, PLAU, SYK		no significant results
	hsa04540	Gap junction	17	1.56028	ADCY3, ADCY4, MAP2K2, GNA11, RAF1, GJA1, ITPR3, ITPR1, TJP1, PDGFRA, PDGFRB, PDGFC, PDGFD, HTR2B, TUBA1A, TUBA1C, HTR2A		magenta
	hsa04512	ECM-receptor interaction	16	1.31278	IBSP, COL3A1, COL5A2, LAMA2, VWF, CD47, LAMA4, LAMB2, CD36, ITGAV, COL6A3, COL1A2, LAMC1, THBS1, THBS2, THBS4		hsa05205	Proteoglycans in cancer	9	2.47142	ACTB, ACTG1, EIF4B, HIF1A, CD44, HSPG2, IGF2, MSN, THBS1
	hsa05416	Viral myocarditis	15	2.57341	CAV1, HLA-DRB3, HLA-A, HLA-B, HLA-DMB, HLA-DMA, HLA-F, CD55, CCND1, HLA-DRB4, HLA-DRB5, HLA-DPA1, HLA-DPB1, HLA-DOA, HLA-DRA		hsa04145	Phagosome	7	1.96156	ACTB, ACTG1, RAB5B, C3, MRC2, C1R, THBS1
	hsa05321	Inflammatory bowel disease (IBD)	15	2.09258	HLA-DRB3, TGFB3, SMAD3, NFKB1, HLA-DMB, STAT1, HLA-DMA, STAT4, HLA-DRB4, HLA-DRB5, HLA-DPA1, HLA-DPB1, HLA-DOA, IFNGR1, HLA-DRA		hsa05203	Viral carcinogenesis	7	1.36974	HIST1H2BD, RBL2, C3, HIST2H2BE, JAK1, RB1, YWHAE
	hsa03050	Proteasome	14	3.2281	PSMB10, PSMA2, PSMB4, PSMB7, PSMC5, PSMB6, PSMB1, PSMA6, PSMA5, PSMA4, PSMB2, PSMA3, PSME4, PSMD7		hsa04810	Regulation of actin cytoskeleton	7	1.32732	ACTB, ACTG1, ARPC1B, SSH1, ARPC4, MSN, NCKAP1
	hsa04610	Complement and coagulation cascades	14	1.46598	C3AR1, A2M, CFB, C3, F13A1, C1R, C1QC, C1QB, VWF, CD55, CFH, CFI, CFD, PLAU		hsa04670	Leukocyte transendothelial migration	6	1.84648	ACTB, ACTG1, PECAM1, CLDN1, MSN, CXCL12
	hsa05220	Chronic myeloid leukemia	14	1.33362	PIK3CG, MAP2K2, TGFB3, SMAD4, RAF1, NFKB1, CDK4, PTPN11, CCND1, CBLB, HDAC2, CDKN1B, HDAC1, PIK3R2		hsa05322	Systemic lupus erythematosus	6	1.58839	HIST1H2AC, HIST1H2BD, C4B, C3, HIST2H2BE, C1R
	hsa04940	Type I diabetes mellitus	13	2.87829	HLA-DRB3, HLA-A, HLA-B, HLA-DMB, HLA-DMA, HLA-F, CPE, HLA-DRB4, HLA-DRB5, HLA-DPA1, HLA-DPB1, HLA-DOA, HLA-DRA		hsa05130	Pathogenic Escherichia coli infection	5	2.43904	ACTB, ACTG1, ARPC1B, ARPC4, NCL
	hsa00480	Glutathione metabolism	13	2.12037	MGST3, LAP3, ODC1, TXNDC12, GSTM3, GSTA4, GPX4, GSTK1, GPX3, RRM1, PGD, GSTT1, GSTP1		hsa05131	Shigellosis	5	2.08702	ACTB, ACTG1, ARPC1B, CD44, ARPC4
	hsa05212	Pancreatic cancer	13	1.32883	PIK3CG, ARHGEF6, TGFB3, SMAD4, SMAD3, RAF1, NFKB1, CDK4, STAT1, CCND1, RALB, RALA, PIK3R2		hsa05132	Salmonella infection	5	1.70316	ACTB, ACTG1, ARPC1B, TJP1, ARPC4
	hsa05332	Graft-versus-host disease	12	3.30317	HLA-DRB3, HLA-DRB4, HLA-A, HLA-DRB5, HLA-DPA1, HLA-B, HLA-DPB1, HLA-DMB, HLA-DOA, HLA-DMA, HLA-DRA, HLA-F		hsa04530	Tight junction	5	1.63613	ACTB, ACTG1, TJP1, CLDN1, TJP2
	hsa05330	Allograft rejection	12	2.83538	HLA-DRB3, HLA-DRB4, HLA-A, HLA-DRB5, HLA-DPA1, HLA-B, HLA-DPB1, HLA-DMB, HLA-DOA, HLA-DMA, HLA-DRA, HLA-F		hsa05110	Vibrio cholerae infection	4	1.57092	ACTB, ACTG1, TJP1, TJP2
	hsa05130	Pathogenic Escherichia coli infection	12	1.70417	ARPC1A, ARPC1B, ARPC3, LY96, HCLS1, NCK1, ARPC5L, ARPC5, TUBA1A, WAS, CD14, TUBA1C		midnightblue
	hsa05320	Autoimmune thyroid disease	12	1.64444	HLA-DRB3, HLA-DRB4, HLA-A, HLA-DRB5, HLA-DPA1, HLA-B, HLA-DPB1, HLA-DMB, HLA-DOA, HLA-DMA, HLA-DRA, HLA-F		hsa00140	Steroid hormone biosynthesis	5	1.44827	UGT1A9, CYP7A1, HSD17B12, SRD5A2, AKR1C1
	hsa04672	Intestinal immune network for IgA production	11	1.55263	TNFSF13B, HLA-DRB3, HLA-DRB4, HLA-DRB5, HLA-DPA1, HLA-DPB1, HLA-DMB, HLA-DOA, HLA-DMA, CXCL12, HLA-DRA		red
	hsa05310	Asthma	10	2.43813	FCER1A, HLA-DRB3, HLA-DRB4, HLA-DRB5, HLA-DPA1, HLA-DPB1, HLA-DMB, HLA-DOA, HLA-DMA, HLA-DRA		hsa01100	Metabolic pathways	126	2.71698	IMPAD1, NDUFAB1, ADH1A, COX5A, COX5B, MTHFD1L, HIBADH, CMBL, PTGIS, TRAK2, RPN1, PDHA1, HADH, GPT2, CRLS1, SUCLG2, NME4, PGLS, PLCE1, NME3, CHPF, DLD, ATP5C1, EXT1, MDH1, HSD17B10, AHCY, ASS1, ALDOC, GLUD1, COX7B, ACAT1, PPAT, LPCAT1, COX6B1, FH, ADSSL1, B4GALT3, MAOA, MAOB, ACACB, TST, ALDH2, COX6A1, AHCYL1, GUK1, NNMT, HEXB, SAT2, CYC1, ALG5, PIP5K1C, PMVK, UQCRFS1, UQCRQ, CKB, AKR1C3, NDUFS5, …
	hsa00620	Pyruvate metabolism	10	1.58705	LDHB, LDHA, ALDH2, GLO1, ACACB, ACAT1, MDH2, ALDH9A1, PDHB, MDH1		hsa05016	Huntington's disease	44	9.36844	POLR2G, POLR2F, NDUFB5, NDUFB6, POLR2L, NDUFB7, AP2S1, CYC1, POLR2I, COX7B, NDUFAB1, UQCRFS1, COX5A, COX5B, POLR2C, UQCRQ, NDUFB2, POLR2A, NDUFS5, NDUFS8, COX6B1, ATP5O, ATP5H, ATP5J, NDUFA5, NDUFB10, NDUFA3, COX7A2, SLC25A4, COX7A1, NDUFA8, SLC25A5, ATP5F1, SOD1, NDUFA1, VDAC3, NDUFA12, DCTN2, NDUFA11, SDHB, UQCRH, SDHD, ATP5C1, COX6A1
	hsa00030	Pentose phosphate pathway	9	1.98202	PGLS, ALDOC, PGM1, PGD, PFKP, DERA, TKT, RPIA, PRPS1		hsa05012	Parkinson's disease	39	10.7606	NDUFB5, NDUFB6, NDUFB7, CYC1, COX7B, UCHL1, NDUFAB1, UQCRFS1, COX5A, UQCRQ, COX5B, NDUFB2, NDUFS5, NDUFS8, COX6B1, ATP5O, ATP5H, ATP5J, NDUFA5, NDUFB10, NDUFA3, COX7A2, SLC25A4, COX7A1, NDUFA8, SLC25A5, UBE2J1, ATP5F1, NDUFA1, VDAC3, PARK7, NDUFA12, NDUFA11, SDHB, UQCRH, SDHD, ATP5C1, COX6A1, UBB
	hsa03030	DNA replication	9	1.42977	RPA2, POLE4, SSBP1, POLE3, RNASEH1, MCM3, RNASEH2B, MCM6, RPA3		hsa05010	Alzheimer's disease	37	7.39195	HSD17B10, NDUFB5, NDUFB6, NDUFB7, CYC1, COX7B, NDUFAB1, UQCRFS1, COX5A, UQCRQ, COX5B, NDUFB2, NDUFS5, NDUFS8, PPP3CB, COX6B1, PPP3CC, ATP5O, ATP5H, ATP5J, NDUFA5, NDUFB10, COX7A2, NDUFA3, COX7A1, NDUFA8, ATP5F1, NDUFA1, NDUFA12, NDUFA11, SDHB, UQCRH, SDHD, ATP5C1, COX6A1, CALM2, CALM1
	hsa00270	Cysteine and methionine metabolism	9	1.30506	LDHB, LDHA, AHCY, DNMT1, AHCYL1, ENOPH1, CDO1, MDH2, MDH1		hsa00190	Oxidative phosphorylation	36	9.72991	NDUFB5, NDUFB6, NDUFB7, CYC1, COX7B, NDUFAB1, ATP6V1G1, UQCRFS1, COX5A, UQCRQ, COX5B, NDUFB2, NDUFS5, NDUFS8, COX6B1, ATP5L, ATP5O, COX17, ATP5H, ATP5J, NDUFA5, NDUFB10, COX7A2, NDUFA3, COX7A1, NDUFA8, ATP5F1, NDUFA1, NDUFA12, NDUFA11, SDHB, UQCRH, ATP6V1E1, SDHD, ATP5C1, COX6A1
	hsa03060	Protein export	8	2.03388	SRP14, SEC61B, SEC11A, SPCS1, SRPRB, SRP72, SRP19, SEC61G		hsa03010	Ribosome	34	8.22697	RPL17, MRPS16, MRPS11, RPL35, RPS15A, RPL38, RPL39, MRPL12, MRPL15, RPLP1, MRPL19, RPL10A, RPL7A, RPS20, RPS21, MRPL33, RPS23, RPS24, MRPL1, RPL35A, RPL26, RPS9, MRPS5, RPL24, MRPS6, MRPS21, RPS4X, RPS5, MRPL24, RPS18, MRPS9, RPL23, RPS17, RPL13A
	green						hsa04932	Non-alcoholic fatty liver disease (NAFLD)	34	7.03603	NDUFB5, NDUFB6, NDUFB7, CYC1, COX7B, NDUFAB1, UQCRFS1, COX5A, UQCRQ, COX5B, NDUFB2, NDUFS5, XBP1, NDUFS8, COX6B1, PRKAA1, ITCH, NDUFA5, NDUFB10, NDUFA3, COX7A2, COX7A1, NDUFA8, PRKAB1, ADIPOR2, NDUFA1, DDIT3, NDUFA12, NDUFA11, SDHB, UQCRH, EIF2S1, SDHD, COX6A1
	hsa04514	Cell adhesion molecules (CAMs)	7	2.12133	CLDN17, CLDN19, HLA-DRB1, CLDN5, SELPLG, HLA-DQA1, SDC2		hsa04510	Focal adhesion	34	3.97811	TLN1, CAV1, PGF, BCAR1, ELK1, MYL9, LAMB2, ITGAV, PDGFC, ZYX, LAMB1, THBS2, SHC4, COL4A1, MAP2K1, ACTN4, ROCK1, ITGA1, RAF1, COL5A2, FLNB, PPP1CB, ITGA9, PPP1CA, CRKL, CCND3, LAMA5, ITGA5, CCND2, ITGA8, PDGFRA, PDGFRB, LAMC1, PARVA
	hsa05150	Staphylococcus aureus infection	5	2.38569	HLA-DRB1, C4B, C2, SELPLG, HLA-DQA1		hsa04144	Endocytosis	32	2.18608	VPS29, RAB7A, CAV1, CHMP4C, LDLR, TSG101, AP2S1, CAPZA2, SNX2, PIP5K1C, HSPA2, ARPC3, SNF8, VPS4B, RAB11A, VPS35, ITCH, EHD1, EHD2, VPS36, IQSEC1, VPS45, HLA-G, RAB31, RAB11FIP3, RABEP1, IGF2R, RAB22A, PDGFRA, WASL, SH3GL1, VPS25
	red						hsa01130	Biosynthesis of antibiotics	27	1.6707	HSD17B10, ASS1, ALDOC, ADH5, ACAT1, PPAT, CMBL, FNTB, ZMPSTE24, PDHA1, HADH, PAPSS2, FH, DLST, SUCLG2, PFKP, NME4, SDHB, PGLS, NME3, SDHD, DLD, PHGDH, ALDH2, PCYOX1, MDH1, CBS
	hsa04510	Focal adhesion	10	4.25399	LAMA5, ITGA8, ITGA1, ACTN1, COL6A1, FLNC, MYLK, COL4A5, MYL9, VCL		hsa04141	Protein processing in endoplasmic reticulum	26	2.64509	DERL1, GANAB, WFS1, SSR1, RBX1, HSPH1, HSPA2, DNAJB11, XBP1, RPN1, DAD1, DNAJA1, SEC61A1, P4HB, HSP90AA1, CRYAB, CKAP4, UBE2J1, DDIT3, BCAP31, HSP90B1, EIF2AK1, VCP, EIF2S1, SSR4, UBE2E2
	hsa04270	Vascular smooth muscle contraction	8	4.2482	ACTG2, ACTA2, CALD1, RAMP1, MYLK, KCNMB1, PPP1R14A, MYL9		hsa03013	RNA transport	23	1.67309	CLNS1A, NXT1, XPO1, ELAC2, NUP160, NUP88, STRAP, SNUPN, EIF1B, FXR2, SENP2, EIF3H, EIF2S1, EIF4A2, NUP205, EIF4A1, SRRM1, EIF3I, POP4, EIF2B2, KPNB1, POP7, EIF2B5
	hsa04810	Regulation of actin cytoskeleton	8	2.7031	PFN2, ITGA8, ITGA1, RRAS, ACTN1, MYLK, MYL9, VCL		hsa04022	cGMP-PKG signaling pathway	21	1.52269	ADCY3, ROCK1, SLC25A4, MAP2K1, SLC25A5, RAF1, NPR2, ATP1A2, SRF, PPP1CB, VDAC3, KCNMB1, MYL9, PPP1CA, PDE2A, PLN, ADRA1B, PPP3CB, PPP3CC, CALM2, CALM1
	hsa05414	Dilated cardiomyopathy	6	3.14342	DES, PLN, ITGA8, ITGA1, TPM2, SGCA		hsa04270	Vascular smooth muscle contraction	18	1.89159	ADCY3, ROCK1, MAP2K1, ACTA2, CALD1, RAF1, NPR2, PPP1CB, KCNMB1, MYL9, ACTG2, PPP1CA, MYL6B, ADRA1B, RAMP1, PPP1R14A, CALM2, CALM1
	hsa04512	ECM-receptor interaction	6	3.07388	LAMA5, ITGA8, ITGA1, COL6A1, SDC4, COL4A5		hsa01200	Carbon metabolism	17	1.71055	DLST, SUCLG2, GLUD1, ALDOC, PFKP, ADH5, ACAT1, SDHB, PGLS, SDHD, DLD, PHGDH, HIBCH, PDHA1, GPT2, MDH1, FH
	hsa05410	Hypertrophic cardiomyopathy (HCM)	5	2.36227	DES, ITGA8, ITGA1, TPM2, SGCA		hsa04260	Cardiac muscle contraction	16	3.07428	ACTC1, COX7A2, COX7A1, COX7B, CYC1, CACNB3, ATP1A2, COX5A, UQCRFS1, TPM2, TPM1, COX5B, UQCRQ, UQCRH, COX6B1, COX6A1
	hsa04022	cGMP-PKG signaling pathway	5	1.33724	SLC25A4, PLN, MYLK, KCNMB1, MYL9		hsa05410	Hypertrophic cardiomyopathy (HCM)	14	2.02879	ACTC1, PRKAB1, ITGA1, CACNB3, TPM2, TPM1, ITGA9, ITGA5, ITGAV, ITGA8, SGCD, PRKAA1, SGCA, SGCB
	hsa05412	Arrhythmogenic right ventricular cardiomyopathy (ARVC)	4	1.71048	DES, ITGA8, ITGA1, SGCA		hsa05414	Dilated cardiomyopathy	14	1.76897	ADCY3, ACTC1, ITGA1, CACNB3, TPM2, TPM1, ITGA9, ITGA5, ITGAV, PLN, ITGA8, SGCD, SGCA, SGCB
	hsa04530	Tight junction	4	1.41753	MPDZ, MYH11, ACTN1, MYL9		hsa04512	ECM-receptor interaction	14	1.6517	COL4A1, ITGA1, SDC4, COL5A2, CD47, ITGA9, LAMB2, ITGA5, LAMA5, ITGAV, ITGA8, LAMC1, LAMB1, THBS2
	turquoise						hsa05412	Arrhythmogenic right ventricular cardiomyopathy (ARVC)	13	2.15868	ITGA1, GJA1, CACNB3, CDH2, TCF7L2, TCF7L1, ITGA9, ITGA5, ITGAV, ITGA8, SGCD, SGCA, SGCB
	hsa04060	Cytokine-cytokine receptor interaction	36	2.36685	CCL1, CSF3, CXCL1, CCL3, IL9R, CXCL5, IL18, CXCR1, IFNW1, CD70, PF4, CCL4, TNFRSF4, CXCL10, LIF, CCL20, CCL3L1, IFNA5, IL4R, CSF3R, CSF2RB, IL2RG, IFNGR2, IL3, LTBR, IL18RAP, EDAR, IL24, CCL18, IFNAR1, CCL11, INHBA, CCR8, CCR5, CXCL16, XCL2		hsa03050	Proteasome	10	2.11248	PSMB5, PSMD14, PSMB7, PSMC5, PSMA5, PSMC2, PSMB2, PSMD1, PSMD2, PSMD8
	hsa04062	Chemokine signaling pathway	34	3.85749	CCL1, CXCL1, CCL3, CXCL5, BCAR1, ADCY5, GNG13, CXCR1, PF4, CCL4, PXN, CXCL10, GNG8, DOCK2, PLCB3, PLCB4, CCL20, CCL3L1, RASGRP2, RHOA, GNG5, HCK, VAV1, CCL18, STAT2, CCL11, CCR8, NRAS, CRKL, CCR5, CXCL16, IKBKG, WASL, XCL2		hsa00020	Citrate cycle (TCA cycle)	8	2.05931	DLST, SDHB, SUCLG2, DLD, SDHD, PDHA1, MDH1, FH
	hsa04145	Phagosome	26	2.66192	RAB7A, RAB7B, DYNC1LI2, TUBB2B, RAB5B, TUBB2A, ATP6AP1, ITGB2, ATP6V1G1, SFTPA1, ATP6V0B, MARCO, COMP, SCARB1, FCGR3A, TUBB1, FCGR3B, TUBB3, MRC1, NOS1, NCF2, OLR1, MRC2, ATP6V1D, ATP6V1F, DYNC1I2		hsa03060	Protein export	7	2.07194	IMMP2L, OXA1L, SEC11C, SRP68, SPCS1, SRPRB, SEC61A1
	hsa05152	Tuberculosis	26	1.73962	MRC1, RAB7A, RAB5B, ATP6AP1, IL18, CAMP, SPHK1, MRC2, ITGB2, CD74, ATP6V0B, LSP1, PLK3, ITGAX, MAPK13, IFNA5, PPP3CB, RHOA, JAK1, PPP3CC, FCER1G, LBP, FCGR3A, FCGR3B, IFNGR2, CALM2		hsa03020	RNA polymerase	7	1.38757	POLR2G, POLR2F, POLR2L, POLR2I, POLR3GL, POLR2C, POLR2A
	hsa04380	Osteoclast differentiation	25	3.16279	NOX3, FOSL2, NCF2, RELB, SOCS1, ACP5, NFKB2, SIRPA, IFNAR1, STAT2, LILRA2, LILRB5, MAPK13, LILRB3, OSCAR, IKBKG, PPP3CB, JAK1, PPP3CC, FCGR3A, FCGR3B, FOSL1, IFNGR2, TYROBP, NFATC1		turquoise
	hsa05010	Alzheimer's disease	25	1.7451	NDUFA4, NDUFB4, NOS1, ATP5B, SNCA, CYC1, ATP5F1, COX7C, NDUFA10, COX5B, UQCRQ, CAPN1, COX6C, PLCB3, NDUFS4, PLCB4, LRP1, UQCRH, APOE, PPP3CB, PPP3CC, ATP5O, NDUFS3, CALM2, ATP5J		hsa04145	Phagosome	37	15.5903	RAB7B, HLA-DRB3, TLR4, ITGB2, ATP6V1B2, HLA-DMB, HLA-DMA, ITGAM, ATP6V0B, MARCO, FCGR1A, TAP1, HLA-DRB4, SCARB1, HLA-DPB1, HLA-DOA, ATP6V0D1, OLR1, NCF2, NCF4, HLA-B, CTSS, M6PR, HLA-DQA1, ATP6V1F, HLA-F, CYBA, ATP6V1A, LAMP2, CORO1A, CD36, FCGR2B, ATP6V0A1, HLA-DPA1, FCGR2A, CD14, HLA-DRA
	hsa05016	Huntington's disease	25	1.15428	POLR2H, NDUFA4, DNAH11, NDUFB4, ATP5B, CYC1, ATP5F1, COX7C, VDAC2, NDUFA10, COX5B, VDAC3, UQCRQ, SOD2, COX6C, PPIF, PLCB3, NDUFS4, PLCB4, UQCRH, BBC3, ATP5O, CREB3L3, NDUFS3, ATP5J		hsa05152	Tuberculosis	37	13.1224	HLA-DRB3, TLR1, TLR4, ITGB2, HLA-DMB, HLA-DMA, CD74, ITGAM, ATP6V0B, NOD2, ITGAX, IL10RB, IL10RA, FCGR1A, HLA-DRB4, FCER1G, IL1B, HLA-DPB1, HLA-DOA, ATP6V0D1, SYK, CARD9, CAMP, CTSS, STAT1, HLA-DQA1, LAMP2, CORO1A, FCGR2B, MAPK13, RIPK2, CTSD, ATP6V0A1, HLA-DPA1, FCGR2A, CD14, HLA-DRA
	hsa04142	Lysosome	21	2.19562	SGSH, PLA2G15, LITAF, GM2A, PSAP, ATP6AP1, GUSB, LGMN, AP3S1, ACP5, CTSA, ACP2, ATP6V0B, GNS, SLC11A1, CD68, GLA, CTSO, AP3B2, MCOLN1, GGA2		hsa04142	Lysosome	36	17.9582	LITAF, AP1G2, GM2A, LGMN, ACP5, ACP2, CTSA, PPT1, ATP6V0B, SLC11A2, SLC11A1, CD68, NAGPA, LAPTM5, TPP1, MAN2B1, ATP6V0D1, GBA, LIPA, PLA2G15, GUSB, CTSS, M6PR, MANBA, GNS, LAMP2, NPC1, NPC2, GLA, GAA, ARSA, CTSD, ATP6V0A1, CTSC, NEU1, CTSB
	hsa05012	Parkinson's disease	21	1.47834	NDUFA4, NDUFB4, ATP5B, ADCY5, SNCA, TH, CYC1, COX7C, ATP5F1, NDUFA10, VDAC2, UQCRQ, COX5B, VDAC3, COX6C, PPIF, NDUFS4, UQCRH, ATP5O, NDUFS3, ATP5J		hsa05323	Rheumatoid arthritis	29	15.6335	ITGAL, CCL3, CCL2, HLA-DRB3, ACP5, ITGB2, TLR4, ATP6V1B2, HLA-DMB, CCL5, HLA-DMA, ATP6V0B, MMP1, CCL20, CCL3L1, HLA-DRB4, IL1B, HLA-DPB1, HLA-DOA, ATP6V0D1, CD28, ICAM1, HLA-DQA1, ATP6V1F, ATP6V1A, TNFSF13B, ATP6V0A1, HLA-DPA1, HLA-DRA
	hsa00190	Oxidative phosphorylation	20	1.48352	NDUFA4, NDUFB4, ATP6AP1, ATP5B, CYC1, COX7C, ATP5F1, ATP6V1G1, NDUFA10, UQCRQ, ATP6V1D, COX5B, ATP6V0B, COX6C, ATP6V1F, NDUFS4, UQCRH, ATP5O, NDUFS3, ATP5J		hsa04380	Osteoclast differentiation	29	10.8311	GRB2, SPI1, ACP5, BTK, LILRA2, LILRA3, FCGR1A, OSCAR, IL1B, SYK, CSF1R, TYROBP, PIK3CG, NCF2, NCF4, PIK3CD, STAT1, SIRPA, STAT2, TYK2, LILRB2, CYBA, CYBB, FCGR2B, MAPK13, LILRB3, PLCG2, FCGR2A, TREM2
	hsa04650	Natural killer cell mediated cytotoxicity	17	1.05141	ICAM1, KIR2DS5, ITGB2, GZMB, VAV1, IFNAR1, NRAS, IFNA5, PPP3CB, FCER1G, PPP3CC, RAET1L, FCGR3A, FCGR3B, IFNGR2, TYROBP, NFATC1		hsa05164	Influenza A	27	6.66056	IFIH1, CCL2, HLA-DRB3, OAS3, TLR4, HLA-DMB, CCL5, HLA-DMA, TLR7, HLA-DRB4, HSPA6, IL1B, HLA-DPB1, HLA-DOA, HSPA8, PIK3CG, ICAM1, PIK3CD, NXF1, STAT1, FURIN, HLA-DQA1, STAT2, TYK2, MAPK13, HLA-DPA1, HLA-DRA
	hsa05132	Salmonella infection	15	1.75936	CXCL1, RAB7A, CCL3, DYNC1LI2, RAB7B, IL18, KLC2, CCL4, FLNA, MAPK13, CCL3L1, WASL, LBP, IFNGR2, DYNC1I2		hsa04062	Chemokine signaling pathway	27	6.08154	CCL3, CCL2, FGR, ADCY7, GRB2, CCR1, PREX1, CXCL9, CCL8, CCL5, DOCK2, RAC2, CCL20, CCL3L1, CXCR4, PLCB2, PIK3CG, LYN, HCK, PIK3CD, STAT1, PRKCD, VAV1, WAS, CCL18, STAT2, CXCL16
	hsa05323	Rheumatoid arthritis	15	1.55623	ICAM1, CCL3, CXCL5, ATP6AP1, IL18, ACP5, ITGB2, ATP6V1G1, MMP3, ATP6V1D, ATP6V0B, MMP1, ATP6V1F, CCL20, CCL3L1		hsa05150	Staphylococcus aureus infection	25	17.3685	ICAM1, ITGAL, C3AR1, C5AR1, HLA-DRB3, FPR1, FPR3, ITGB2, HLA-DMB, HLA-DMA, C1QC, HLA-DQA1, ITGAM, C1QA, C1QB, FCGR2B, FCGR1A, HLA-DRB4, HLA-DPA1, FCGR2A, HLA-DPB1, C2, HLA-DOA, PTAFR, HLA-DRA
	hsa00010	Glycolysis / Gluconeogenesis	13	1.76692	HK2, FBP1, ADH5, ADH1C, ADH1B, ADH7, FBP2, PCK1, HK3, ALDH1A3, DLD, ENO2, ENO1		hsa05166	HTLV-I infection	25	2.91669	KAT2A, PIK3CG, ICAM1, ITGAL, ADCY7, CD3D, HLA-DRB3, PIK3CD, SPI1, ITGB2, CDC20, HLA-B, FZD2, HLA-DMB, HLA-DMA, HLA-DQA1, HLA-F, VCAM1, MAP3K1, HLA-DRB4, HLA-DPA1, HLA-DPB1, HLA-DOA, TP53INP1, HLA-DRA
	hsa04610	Complement and coagulation cascades	13	1.6721	C7, F10, C5AR1, C4A, C6, BDKRB1, PROC, PLAUR, C1QA, C8B, SERPINF2, SERPINA5, PROS1		hsa04514	Cell adhesion molecules (CAMs)	24	6.59259	ICAM1, ITGAL, CD8A, CADM1, HLA-DRB3, ITGB2, HLA-B, HLA-DMB, HLA-DMA, ITGAM, HLA-DQA1, CLDN23, HLA-F, VCAM1, ITGB7, CD2, HLA-DRB4, HLA-DPA1, CD4, HLA-DPB1, HLA-DOA, CD6, HLA-DRA, CD28
	hsa00980	Metabolism of xenobiotics by cytochrome P450	13	1.45653	AKR1C2, SULT2A1, CYP2B6, ALDH1A3, ADH1C, ADH5, ADH1B, ADH7, GSTO1, GSTM5, MGST1, AKR1C1, MGST2		hsa05168	Herpes simplex infection	24	4.65991	IFIH1, CCL2, HLA-DRB3, OAS3, TNFRSF14, HLA-B, NXF1, HLA-DMB, STAT1, CCL5, HLA-DMA, HLA-DQA1, CD74, HLA-F, STAT2, TYK2, TAP1, HLA-DRB4, IL1B, HLA-DPA1, HLA-DPB1, HLA-DOA, PILRA, HLA-DRA
	hsa03320	PPAR signaling pathway	12	1.40707	ACOX2, APOA2, OLR1, CYP27A1, FABP1, AQP7, GK, ADIPOQ, FABP5, MMP1, PCK1, ANGPTL4		hsa04060	Cytokine-cytokine receptor interaction	24	2.82666	TNFRSF21, CCL3, CCL2, IL18RAP, CCR1, CXCL9, CCL8, TNFRSF14, IL7R, CCL5, CCL18, TNFRSF1B, TNFSF13B, CCL20, CXCR4, IL10RB, CCL3L1, IL10RA, CXCL16, IL4R, IL1B, CSF3R, CSF2RA, CSF1R
	hsa00350	Tyrosine metabolism	11	3.07329	DDC, PNMT, ALDH1A3, TH, ADH1C, ADH5, ADH1B, ADH7, DBH, HPD, AOC3		hsa04612	Antigen processing and presentation	21	9.58642	CD8A, LGMN, HLA-DRB3, IFI30, HLA-B, CTSS, HLA-DMB, HLA-DMA, CD74, HLA-DQA1, HLA-F, TAP1, HSPA6, HLA-DRB4, HLA-DPA1, CD4, CTSB, HLA-DPB1, HLA-DOA, HSPA8, HLA-DRA
	hsa05144	Malaria	11	1.92863	CSF3, ICAM1, SDC1, LRP1, IL18, COMP, PECAM1, HBA2, ITGB2, HBB, SELE		hsa05140	Leishmaniasis	20	9.26949	NCF2, HLA-DRB3, NCF4, ITGB2, TLR4, HLA-DMB, STAT1, HLA-DMA, ITGAM, HLA-DQA1, CYBA, MAPK13, FCGR1A, HLA-DRB4, IL1B, HLA-DPA1, FCGR2A, HLA-DPB1, HLA-DOA, HLA-DRA
	hsa04742	Taste transduction	10	1.72727	GRM4, TRPM5, TAS2R46, GNG13, TAS2R9, TAS2R42, TAS1R3, TAS1R2, TAS2R40, CACNA1A		hsa04640	Hematopoietic cell lineage	20	7.67221	CD8A, CD3D, HLA-DRB3, ANPEP, IL7R, ITGAM, CD37, CD36, FCGR1A, IL4R, CD33, CD2, HLA-DRB4, CSF3R, IL1B, CD4, CD14, CSF2RA, CSF1R, HLA-DRA
	hsa05014	Amyotrophic lateral sclerosis (ALS)	10	1.45232	PRPH, DERL1, NOS1, GRIA2, MAPK13, PPP3CB, PPP3CC, NEFH, NEFL, NEFM		hsa04611	Platelet activation	20	4.86715	PIK3CG, TBXAS1, LYN, ADCY7, FERMT3, PIK3CD, ITPR3, APBB1IP, BTK, VAMP8, MAPK13, PLCG2, COL1A2, FCER1G, FCGR2A, COL1A1, PLA2G4C, PLCB2, MYLK, SYK
	hsa05143	African trypanosomiasis	8	1.56918	ICAM1, PLCB3, PLCB4, IL18, IDO2, HBA2, HBB, SELE		hsa05145	Toxoplasmosis	19	5.3412	LY96, HLA-DRB3, TLR4, HLA-DMB, STAT1, HLA-DMA, HLA-DQA1, TYK2, IL10RB, MAPK13, IL10RA, HSPA6, HLA-DRB4, HLA-DPA1, ALOX5, HLA-DPB1, HLA-DOA, HSPA8, HLA-DRA
	hsa00020	Citrate cycle (TCA cycle)	7	1.29341	DLST, SUCLG2, DLD, OGDHL, ACLY, PCK1, FH		hsa05169	Epstein-Barr virus infection	19	4.69684	PIK3CG, ICAM1, ITGAL, LYN, NFKBIE, HLA-DRB3, PIK3CD, HLA-B, HLA-DQA1, HLA-F, TYK2, MAPK13, PLCG2, HLA-DRB4, HLA-DPA1, HLA-DPB1, TNFAIP3, SYK, HLA-DRA
	yellow						hsa04666	Fc gamma R-mediated phagocytosis	17	5.69817	PIK3CG, LYN, HCK, PIK3CD, VAV1, WAS, PRKCD, DOCK2, FCGR2B, RAC2, FCGR1A, PLCG2, SCIN, MARCKS, FCGR2A, INPP5D, SYK
	hsa04151	PI3K-Akt signaling pathway	13	1.46443	OSM, PPP2R1A, COL4A2, IL6, COL4A1, MCL1, ITGA5, TNC, LAMB1, MYC, THBS3, COL5A1, DDIT4		hsa04670	Leukocyte transendothelial migration	17	3.92326	PIK3CG, ICAM1, ITGAL, NCF2, NCF4, MMP9, PIK3CD, ITGB2, VAV1, ITGAM, CLDN23, VCAM1, CYBA, RAC2, CXCR4, MAPK13, PLCG2
	hsa04668	TNF signaling pathway	12	5.22505	FOS, TNFRSF1B, IL6, CCL2, CEBPB, PTGS2, SOCS3, JUN, CXCL2, NFKBIA, IL1B, JUNB		hsa05322	Systemic lupus erythematosus	17	3.15426	HLA-DRB3, HLA-DMB, HLA-DMA, C1QC, HLA-DQA1, C1QA, C1QB, FCGR1A, HLA-DRB4, H2AFY, HLA-DPA1, FCGR2A, C2, HLA-DPB1, HLA-DOA, HLA-DRA, CD28
	hsa04010	MAPK signaling pathway	12	2.01707	DUSP5, FOS, IL1R1, DUSP1, JUN, HSPA6, HSPB1, IL1B, HSPA1B, GADD45B, MYC, DUSP6		hsa05416	Viral myocarditis	16	7.32401	ICAM1, ITGAL, HLA-DRB3, ITGB2, HLA-B, HLA-DMB, HLA-DMA, HLA-DQA1, HLA-F, RAC2, HLA-DRB4, HLA-DPA1, HLA-DPB1, HLA-DOA, HLA-DRA, CD28
	hsa04380	Osteoclast differentiation	10	3.03203	FOS, IL1R1, SOCS3, SQSTM1, JUN, SPI1, NFKBIA, IL1B, FOSB, JUNB		hsa05321	Inflammatory bowel disease (IBD)	16	6.59936	IL18RAP, HLA-DRB3, TLR4, TLR5, HLA-DMB, STAT1, HLA-DMA, HLA-DQA1, NOD2, IL4R, HLA-DRB4, IL1B, HLA-DPA1, HLA-DPB1, HLA-DOA, HLA-DRA
	hsa03010	Ribosome	9	2.32931	RPS28, RPS19, RPL23, RPL14, RPL13A, RPL3, RPL11, RPL7A, MRPL32		hsa05142	Chagas disease (American trypanosomiasis)	16	3.89063	PIK3CG, GNA15, CCL3, CCL2, CD3D, CD247, PIK3CD, TLR4, CCL5, C1QC, C1QA, C1QB, MAPK13, CCL3L1, IL1B, PLCB2
	hsa05164	Influenza A	9	1.71686	IL6, CCL2, SOCS3, JUN, HSPA6, NFKBIA, IL1B, HSPA1B, DNAJB1		hsa04620	Toll-like receptor signaling pathway	16	3.79566	PIK3CG, CCL3, LY96, PIK3CD, TLR1, CXCL9, TLR4, TLR5, STAT1, CCL5, TLR7, MAPK13, CCL3L1, IL1B, CD14, SPP1
	hsa05168	Herpes simplex infection	9	1.60028	FOS, IL6, CCL2, SOCS3, JUN, NFKBIA, IL1B, HLA-E, HLA-G		hsa05162	Measles	16	2.73718	PIK3CG, IFIH1, CD3D, PIK3CD, OAS3, TLR4, STAT1, TLR7, STAT2, TYK2, FCGR2B, HSPA6, IL1B, TNFAIP3, HSPA8, CD28
	hsa05142	Chagas disease (American trypanosomiasis)	8	2.41295	PPP2R1A, FOS, IL6, CCL2, JUN, SERPINE1, NFKBIA, IL1B		hsa04662	B cell receptor signaling pathway	15	5.39299	PIK3CG, LYN, GRB2, NFKBIE, PIK3CD, CD72, VAV1, BTK, FCGR2B, RAC2, RASGRP3, PLCG2, PIK3AP1, INPP5D, SYK
	hsa05146	Amoebiasis	8	2.36712	COL4A2, IL1R1, IL6, COL4A1, HSPB1, IL1B, LAMB1, COL5A1		hsa04650	Natural killer cell mediated cytotoxicity	15	2.66028	PIK3CG, ICAM1, ITGAL, GRB2, CD247, PIK3CD, ITGB2, VAV1, HCST, CD48, RAC2, PLCG2, FCER1G, TYROBP, SYK
	hsa05133	Pertussis	7	2.50133	FOS, IL6, ITGA5, JUN, CALM3, IL1B, SERPING1		hsa04064	NF-kappa B signaling pathway	14	3.59891	ICAM1, LYN, LY96, BCL2A1, TLR4, BTK, VCAM1, TNFSF13B, PLCG2, IL1B, TNFAIP3, PLAU, CD14, SYK
	hsa05222	Small cell lung cancer	7	2.23249	COL4A2, COL4A1, PTGS2, RXRB, NFKBIA, LAMB1, MYC		hsa04668	TNF signaling pathway	14	2.72972	PIK3CG, VCAM1, ICAM1, TNFRSF1B, NOD2, CCL2, CCL20, MAPK13, MMP9, PIK3CD, RIPK3, IL1B, TNFAIP3, CCL5
	hsa04512	ECM-receptor interaction	7	2.18363	COL4A2, COL4A1, ITGA5, TNC, LAMB1, THBS3, COL5A1		hsa05332	Graft-versus-host disease	13	7.71556	HLA-DRB3, HLA-B, HLA-DMB, HLA-DMA, HLA-DQA1, HLA-F, HLA-DRB4, IL1B, HLA-DPA1, HLA-DPB1, HLA-DOA, CD28, HLA-DRA
	hsa05134	Legionellosis	6	2.4307	IL6, CXCL2, HSPA6, NFKBIA, IL1B, HSPA1B		hsa04940	Type I diabetes mellitus	13	6.39361	HLA-DRB3, HLA-B, HLA-DMB, HLA-DMA, HLA-DQA1, HLA-F, HLA-DRB4, IL1B, HLA-DPA1, HLA-DPB1, HLA-DOA, CD28, HLA-DRA
	hsa04621	NOD-like receptor signaling pathway	6	2.36202	IL6, CCL2, CXCL2, NFKBIA, IL1B, TRIP6		hsa04672	Intestinal immune network for IgA production	13	5.81447	HLA-DRB3, HLA-DMB, HLA-DMA, HLA-DQA1, TNFSF13B, CXCR4, ITGB7, HLA-DRB4, HLA-DPA1, HLA-DPB1, HLA-DOA, CD28, HLA-DRA
	hsa04915	Estrogen signaling pathway	6	1.37335	FOS, JUN, HSPA6, CALM3, HBEGF, HSPA1B		hsa04664	Fc epsilon RI signaling pathway	13	4.06935	PIK3CG, LYN, GRB2, PIK3CD, VAV1, BTK, RAC2, MAPK13, PLCG2, FCER1G, INPP5D, PLA2G4C, SYK
	hsa05144	Malaria	5	1.83998	GYPC, IL6, CCL2, IL1B, THBS3		hsa05133	Pertussis	13	3.64712	LY96, ITGB2, TLR4, C1QC, ITGAM, C1QA, C1QB, MAPK13, IRF8, IRF1, IL1B, C2, CD14
	hsa05140	Leishmaniasis	5	1.31835	FOS, PTGS2, JUN, NFKBIA, IL1B		hsa04630	Jak-STAT signaling pathway	13	1.31966	PIK3CG, GRB2, PIK3CD, PIM1, IL7R, STAT1, STAT2, TYK2, IL10RB, IL10RA, IL4R, CSF3R, CSF2RA
	hsa05332	Graft-versus-host disease	4	1.5975	IL6, IL1B, HLA-E, HLA-G		hsa05330	Allograft rejection	12	6.09772	HLA-DRB3, HLA-DRB4, HLA-DPA1, HLA-B, HLA-DPB1, HLA-DMB, HLA-DOA, HLA-DMA, HLA-DQA1, HLA-DRA, HLA-F, CD28
							hsa05320	Autoimmune thyroid disease	12	4.5327	HLA-DRB3, HLA-DRB4, HLA-DPA1, HLA-B, HLA-DPB1, HLA-DMB, HLA-DOA, HLA-DMA, HLA-DQA1, HLA-DRA, HLA-F, CD28
							hsa03320	PPAR signaling pathway	12	3.48771	LPL, ACSL1, CD36, OLR1, CYP27A1, SORBS1, SCD, GK, FABP5, PLTP, MMP1, NR1H3
							hsa04750	Inflammatory mediator regulation of TRP channels	12	2.12717	PIK3CG, PTGER4, ADCY7, MAPK13, PIK3CD, PLCG2, PRKCH, IL1B, ITPR3, PLA2G4C, PRKCD, PLCB2
							hsa05146	Amoebiasis	12	1.88098	PIK3CG, GNA15, RAB7B, PIK3CD, COL1A2, IL1B, TLR4, ITGB2, COL1A1, PLCB2, ITGAM, CD14
							hsa05120	Epithelial cell signaling in Helicobacter pylori infection	11	2.88527	ATP6V1A, LYN, MAPK13, PLCG2, ATP6V0A1, ATP6V1B2, CCL5, ATP6V0D1, CSK, ATP6V0B, ATP6V1F
							hsa05132	Salmonella infection	11	2.19056	RAB7B, CCL3, MAPK13, CCL3L1, IL1B, TLR4, TLR5, FLNC, WAS, RHOG, CD14
							hsa04915	Estrogen signaling pathway	11	1.67851	PIK3CG, ADCY7, GRB2, FKBP4, MMP9, PIK3CD, HSPA6, ITPR3, PRKCD, PLCB2, HSPA8
							hsa04660	T cell receptor signaling pathway	11	1.65107	PIK3CG, CD3D, CD8A, GRB2, MAPK13, NFKBIE, PIK3CD, CD247, CD4, VAV1, CD28
							hsa05310	Asthma	10	5.11946	HLA-DRB3, HLA-DRB4, FCER1G, HLA-DPA1, HLA-DPB1, HLA-DMB, HLA-DOA, HLA-DMA, HLA-DQA1, HLA-DRA
							hsa04621	NOD-like receptor signaling pathway	9	2.28816	NOD2, CARD9, CCL2, MAPK13, PSTPIP1, RIPK2, IL1B, CCL5, TNFAIP3
							hsa04610	Complement and coagulation cascades	9	1.75352	C1QA, C3AR1, C1QB, C5AR1, SERPINA1, C2, C1QC, PLAU, PLAUR
							hsa05144	Malaria	8	2.06078	VCAM1, ICAM1, ITGAL, CD36, CCL2, IL1B, TLR4, ITGB2
							hsa05110	Vibrio cholerae infection	8	1.92193	ATP6V1A, PLCG2, ATP6V0A1, ATP6V1B2, PDIA4, ATP6V0D1, ATP6V0B, ATP6V1F
							hsa05134	Legionellosis	8	1.83575	HSPA6, IL1B, TLR4, ITGB2, TLR5, ITGAM, CD14, HSPA8
							hsa05340	Primary immunodeficiency	7	2.28104	CD3D, CD8A, TAP1, CD4, IL7R, ADA, BTK
							hsa04966	Collecting duct acid secretion	6	2.06382	ATP6V1A, ATP6V0A1, ATP6V1B2, CA2, ATP6V0D1, ATP6V1F
							hsa00511	Other glycan degradation	5	2.0169	NEU1, MAN2B1, FUCA1, MANBA, GBA
							hsa00290	Valine, leucine and isoleucine biosynthesis	3	1.88152	BCAT1, SDS, SDSL
