# Supplementary material for: Identification of crucial genes in abdominal aortic aneurysm by WGCNA
Source: PeerJ. 2019 Oct 8;7:e7873. doi: 10.7717/peerj.7873 (PMC6788446; doi:10.7717/peerj.7873)
Supplement: Supplemental Information 9 [file peerj-07-7873-s009.xlsx]

## Sheet: Sheet1
TableS4 Top 10 GO-BP terms of black, red and turquoise module in AAA condition
GO ID	GO terms	Count	-logP
Black
GO:0007165	signal transduction	23	4.48
GO:0006955	immune response	21	10.54
GO:0002250	adaptive immune response	15	11.41
GO:0007166	cell surface receptor signaling pathway	15	7.87
GO:0007155	cell adhesion	13	3.86
GO:0043547	positive regulation of GTPase activity	13	3.04
GO:0050852	T cell receptor signaling pathway	12	7.94
GO:0050776	regulation of immune response	12	7.11
GO:0045087	innate immune response	11	2.9
GO:0042110	T cell activation	10	10.31
Red
GO:0006936	muscle contraction	18	16.7
GO:0007517	muscle organ development	7	4
GO:0007015	actin filament organization	6	3.47
GO:0014031	mesenchymal cell development	3	3.17
GO:0007160	cell-matrix adhesion	6	3.03
GO:0048041	focal adhesion assembly	4	3
GO:0008016	regulation of heart contraction	4	2.67
GO:0007219	Notch signaling pathway	6	2.56
GO:0030308	negative regulation of cell growth	6	2.46
GO:0002062	chondrocyte differentiation	4	2.38
Turquoise
GO:0007186	G-protein coupled receptor signaling pathway	90	2.04
GO:0006954	inflammatory response	64	8.23
GO:0055114	oxidation-reduction process	62	1.87
GO:0006955	immune response	51	2.77
GO:0007155	cell adhesion	50	1.85
GO:0043066	negative regulation of apoptotic process	49	1.74
GO:0006508	proteolysis	49	1.14
GO:0030154	cell differentiation	47	1.32
GO:0008284	positive regulation of cell proliferation	47	1.27
GO:0045087	innate immune response	46	1.61
