# Supplementary material for: Identification of crucial genes in abdominal aortic aneurysm by WGCNA
Source: PeerJ. 2019 Oct 8;7:e7873. doi: 10.7717/peerj.7873 (PMC6788446; doi:10.7717/peerj.7873)
Supplement: Supplemental Information 11 [file peerj-07-7873-s011.xlsx]

## Sheet: Sheet1
TableS6 Hub genes in AAA and normal conditions
AAA					Normal
Modules	Gene ID	Gene symbol	Official full name	Intramodular connectivity	Modules	Gene ID	Gene symbol	Official full name	Intramodular connectivity
Black	11184	MAP4K1	mitogen-activated protein kinase kinase kinase kinase 1	32.67	Brown	7010	TEK	TEK receptor tyrosine kinase	6.44
Blue	7570	ZNF22	zinc finger protein 22	373.5	Cyan	9600	PITPNM1	phosphatidylinositol transfer protein membrane associated 1	19.27
Green	89874	SLC25A21	solute carrier family 25 member 21	82.25	Darkgreen	930	CD19	CD19 molecule	5.24
Red	4781	NFIB	nuclear factor I B	12.84	Darkturquoise	84524	ZC3H8	zinc finger CCCH-type containing 8	1.57
Turquoise	6815	STYX	serine/threonine/tyrosine interacting protein	485.17	Lightgreen	399671	HEATR4	HEAT repeat containing 4	3.14
Yellow	7126	TNFAIP1	TNF alpha induced protein 1	40.33	Lightyellow	1144	CHRND	cholinergic receptor nicotinic delta subunit	2.19
					Magenta	5925	RB1	RB transcriptional corepressor 1	4.38
					Midnightblue	2660	MSTN	myostatin	26.5
					Red	4190	MDH1		32.84
					Turquoise	6688	SPI1		43.43
