# Supplementary material for: Identification of crucial genes in abdominal aortic aneurysm by WGCNA
Source: PeerJ. 2019 Oct 8;7:e7873. doi: 10.7717/peerj.7873 (PMC6788446; doi:10.7717/peerj.7873)
Supplement: Supplemental Information 12 [file peerj-07-7873-s012.xlsx]

## Sheet: Sheet1
Table S7 GO-BP and KEGG pathway analysis for DEGs						Genes
GO ID	GO terms	Count	Genes	-logP		CDKN2A
GO:0042744	hydrogen peroxide catabolic process	3	PXDN, HBA2, HBB	0.00551668		GSN
GO:0031032	actomyosin structure organization	3	LIMCH1, CNN1, MYH10	0.00993582		LRP1
GO:0042542	response to hydrogen peroxide	3	HBA2, KCNA5, HBB	0.0331017		PSRC1
GO:0007181	transforming growth factor beta receptor complex assembly	2	FMOD, TGFBR3	0.0167009		LDLR
GO:0048251	elastic fiber assembly	2	MYH11, MFAP4	0.0385401		SORT1
GO:0048739	cardiac muscle fiber development	2	MYH11, NEXN	0.0439245		IL6R
GO:0034695	response to prostaglandin E	2	CCR7, TGFBR3	0.0439245		CDKN2B-AS1
GO:2000737	negative regulation of stem cell differentiation	2	JAG1, YAP1	0.0492791		GSN
GO:0044342	type B pancreatic cell proliferation	2	NOV, IGFBP3	0.0492791		ATF3
KEGG ID	KEGG pathways	Count	Genes	-logP		FGF9
hsa04978	Mineral absorption	3	MT1M, CYBRD1, MT1X	1.57279		MMP9
hsa05144	Malaria	3	HBA2, THBS2, HBB	1.48616		ERG
