# Supplementary material for: Identification of crucial genes in abdominal aortic aneurysm by WGCNA
Source: PeerJ. 2019 Oct 8;7:e7873. doi: 10.7717/peerj.7873 (PMC6788446; doi:10.7717/peerj.7873)
Supplement: Supplemental Information 13 [file peerj-07-7873-s013.xlsx]

## Sheet: Sheet1
Table S8 Closest genes for each SNP by distance
SNP	Genes
rs10757278	CDKN2A
rs7025486	GSN
rs1466535	LRP1
rs599839	PSRC1
rs6511720	LDLR
rs602633	SORT1
rs4129267	IL6R
rs10757274	CDKN2B-AS1
rs10985349	GSN
rs1795061	ATF3
rs9316871	FGF9
rs3827066	MMP9
rs2836411	ERG
