# Supplementary material for: Identification of crucial genes in abdominal aortic aneurysm by WGCNA
Source: PeerJ. 2019 Oct 8;7:e7873. doi: 10.7717/peerj.7873 (PMC6788446; doi:10.7717/peerj.7873)
Supplement: Supplemental Information 14 [file peerj-07-7873-s014.xlsx]

## Sheet: Sheet1
Table S9 NES between SNPs and DEGs
Gene Symbol	Gencode Id	Variant Id	SNP	P-Value	P-Value Threshold	NES
rs10757278
MAOA	ENSG00000189221.9	chr9_22124478_A_G_b38	rs10757278	8.1e-05	0.00018	-0.081
THBS2	ENSG00000186340.14	chr9_22124478_A_G_b38	rs10757278	0.00025	8.2e-05	-0.11
NDN	ENSG00000182636.5	chr9_22124478_A_G_b38	rs10757278	0.011	7.4e-05	-0.12
RABGAP1	ENSG00000011454.16	chr9_22124478_A_G_b38	rs10757278	0.024	0.00012	-0.078
PPP1R3C	ENSG00000119938.8	chr9_22124478_A_G_b38	rs10757278	0.036	0.0002	0.078
NXPH3	ENSG00000182575.7	chr9_22124478_A_G_b38	rs10757278	0.042	Not an eGene	-0.061
HSPB2	ENSG00000170276.5	chr9_22124478_A_G_b38	rs10757278	0.055	0.00014	-0.051
YIPF6	ENSG00000181704.11	chr9_22124478_A_G_b38	rs10757278	0.055	0.00015	-0.052
LMOD1	ENSG00000163431.12	chr9_22124478_A_G_b38	rs10757278	0.062	8.8e-05	-0.045
FERMT2	ENSG00000073712.14	chr9_22124478_A_G_b38	rs10757278	0.07	Not an eGene	-0.034
SIK1	ENSG00000142178.7	chr9_22124478_A_G_b38	rs10757278	0.075	0.0001	-0.12
GBP5	ENSG00000154451.14	chr9_22124478_A_G_b38	rs10757278	0.084	Not an eGene	-0.064
ADH1B	ENSG00000196616.13	chr9_22124478_A_G_b38	rs10757278	0.093	0.00014	-0.057
KLF15	ENSG00000163884.3	chr9_22124478_A_G_b38	rs10757278	0.095	Not an eGene	-0.04
FMOD	ENSG00000122176.10	chr9_22124478_A_G_b38	rs10757278	0.096	7.7e-05	-0.058
IGFBP3	ENSG00000146674.14	chr9_22124478_A_G_b38	rs10757278	0.1	0.00012	0.089
TMEM14A	ENSG00000096092.5	chr9_22124478_A_G_b38	rs10757278	0.11	9.6e-05	-0.053
GPD1L	ENSG00000152642.10	chr9_22124478_A_G_b38	rs10757278	0.13	7.8e-05	-0.042
SRPX	ENSG00000101955.14	chr9_22124478_A_G_b38	rs10757278	0.13	0.00019	0.057
ZBTB16	ENSG00000109906.13	chr9_22124478_A_G_b38	rs10757278	0.14	Not an eGene	-0.037
RPL35A	ENSG00000182899.14	chr9_22124478_A_G_b38	rs10757278	0.15	Not an eGene	0.025
IL2RB	ENSG00000100385.13	chr9_22124478_A_G_b38	rs10757278	0.16	Not an eGene	-0.046
GMDS	ENSG00000112699.10	chr9_22124478_A_G_b38	rs10757278	0.17	6.4e-05	-0.048
GGNBP2	ENSG00000278311.4	chr9_22124478_A_G_b38	rs10757278	0.21	9.5e-05	0.04
WFS1	ENSG00000109501.13	chr9_22124478_A_G_b38	rs10757278	0.21	Not an eGene	-0.028
KCNA5	ENSG00000130037.4	chr9_22124478_A_G_b38	rs10757278	0.23	8.9e-05	-0.042
PACSIN2	ENSG00000100266.18	chr9_22124478_A_G_b38	rs10757278	0.23	0.0001	-0.04
HIGD1A	ENSG00000181061.13	chr9_22124478_A_G_b38	rs10757278	0.25	0.00014	0.031
AIF1L	ENSG00000126878.12	chr9_22124478_A_G_b38	rs10757278	0.26	8.3e-05	-0.072
IL6	ENSG00000136244.11	chr9_22124478_A_G_b38	rs10757278	0.26	Not an eGene	0.043
MGP	ENSG00000111341.9	chr9_22124478_A_G_b38	rs10757278	0.26	0.00014	0.035
SPARC	ENSG00000113140.10	chr9_22124478_A_G_b38	rs10757278	0.26	0.00011	0.045
FHL5	ENSG00000112214.10	chr9_22124478_A_G_b38	rs10757278	0.3	0.00018	0.045
MYH10	ENSG00000133026.12	chr9_22124478_A_G_b38	rs10757278	0.3	7.9e-05	-0.027
RCAN2	ENSG00000172348.14	chr9_22124478_A_G_b38	rs10757278	0.3	9.6e-05	0.027
CSPG4	ENSG00000173546.7	chr9_22124478_A_G_b38	rs10757278	0.31	Not an eGene	0.025
CXXC5	ENSG00000171604.11	chr9_22124478_A_G_b38	rs10757278	0.31	0.00023	-0.027
TC2N	ENSG00000165929.12	chr9_22124478_A_G_b38	rs10757278	0.31	9.1e-05	-0.029
TCEAL2	ENSG00000184905.8	chr9_22124478_A_G_b38	rs10757278	0.32	Not an eGene	-0.027
ADH1A	ENSG00000187758.7	chr9_22124478_A_G_b38	rs10757278	0.33	0.00016	-0.051
HBB	ENSG00000244734.3	chr9_22124478_A_G_b38	rs10757278	0.33	Not an eGene	-0.052
NOV	ENSG00000136999.4	chr9_22124478_A_G_b38	rs10757278	0.33	0.00014	0.025
A2M	ENSG00000175899.14	chr9_22124478_A_G_b38	rs10757278	0.34	Not an eGene	-0.035
HBA2	ENSG00000188536.12	chr9_22124478_A_G_b38	rs10757278	0.34	Not an eGene	-0.049
TMEM47	ENSG00000147027.3	chr9_22124478_A_G_b38	rs10757278	0.34	0.00028	0.024
IGFBP6	ENSG00000167779.7	chr9_22124478_A_G_b38	rs10757278	0.35	Not an eGene	-0.034
FRZB	ENSG00000162998.4	chr9_22124478_A_G_b38	rs10757278	0.36	0.00016	-0.031
HSPB7	ENSG00000173641.17	chr9_22124478_A_G_b38	rs10757278	0.36	0.00011	-0.029
NFIA	ENSG00000162599.15	chr9_22124478_A_G_b38	rs10757278	0.36	Not an eGene	-0.021
LSM2	ENSG00000204392.10	chr9_22124478_A_G_b38	rs10757278	0.38	0.00019	-0.027
LMCD1	ENSG00000071282.11	chr9_22124478_A_G_b38	rs10757278	0.39	6.1e-05	-0.028
BBX	ENSG00000114439.18	chr9_22124478_A_G_b38	rs10757278	0.41	Not an eGene	0.019
HLA-DQB1	ENSG00000179344.16	chr9_22124478_A_G_b38	rs10757278	0.41	0.00015	0.043
MYH11	ENSG00000133392.17	chr9_22124478_A_G_b38	rs10757278	0.41	Not an eGene	0.016
CNN1	ENSG00000130176.7	chr9_22124478_A_G_b38	rs10757278	0.43	Not an eGene	0.015
RBPMS2	ENSG00000166831.8	chr9_22124478_A_G_b38	rs10757278	0.43	0.0002	0.034
MMP9	ENSG00000100985.7	chr9_22124478_A_G_b38	rs10757278	0.45	Not an eGene	-0.044
UCP2	ENSG00000175567.8	chr9_22124478_A_G_b38	rs10757278	0.45	0.00017	-0.023
CBX6	ENSG00000183741.11	chr9_22124478_A_G_b38	rs10757278	0.47	0.0001	-0.019
METTL7A	ENSG00000185432.11	chr9_22124478_A_G_b38	rs10757278	0.49	0.00019	0.015
PALLD	ENSG00000129116.17	chr9_22124478_A_G_b38	rs10757278	0.49	0.00013	0.014
CCR7	ENSG00000126353.3	chr9_22124478_A_G_b38	rs10757278	0.5	0.00015	-0.03
FAM129A	ENSG00000135842.16	chr9_22124478_A_G_b38	rs10757278	0.5	0.00015	-0.012
WDR82	ENSG00000164091.11	chr9_22124478_A_G_b38	rs10757278	0.5	0.0003	-0.015
ITGA10	ENSG00000143127.12	chr9_22124478_A_G_b38	rs10757278	0.52	0.0002	-0.017
LIMCH1	ENSG00000064042.17	chr9_22124478_A_G_b38	rs10757278	0.52	9e-05	0.019
ITGA8	ENSG00000077943.7	chr9_22124478_A_G_b38	rs10757278	0.53	0.0001	-0.018
DSTN	ENSG00000125868.15	chr9_22124478_A_G_b38	rs10757278	0.54	Not an eGene	-0.013
EFHD1	ENSG00000115468.11	chr9_22124478_A_G_b38	rs10757278	0.56	0.0001	0.014
IL1B	ENSG00000125538.11	chr9_22124478_A_G_b38	rs10757278	0.56	Not an eGene	-0.027
ZNF462	ENSG00000148143.12	chr9_22124478_A_G_b38	rs10757278	0.58	Not an eGene	0.02
CCDC102A	ENSG00000135736.5	chr9_22124478_A_G_b38	rs10757278	0.59	8.6e-05	-0.014
COX7A1	ENSG00000161281.10	chr9_22124478_A_G_b38	rs10757278	0.6	0.00012	0.015
ITK	ENSG00000113263.12	chr9_22124478_A_G_b38	rs10757278	0.6	Not an eGene	-0.017
SMOC2	ENSG00000112562.18	chr9_22124478_A_G_b38	rs10757278	0.6	7.5e-05	-0.019
TIMP4	ENSG00000157150.4	chr9_22124478_A_G_b38	rs10757278	0.6	0.00011	-0.017
CTSZ	ENSG00000101160.13	chr9_22124478_A_G_b38	rs10757278	0.61	Not an eGene	0.014
FOSB	ENSG00000125740.13	chr9_22124478_A_G_b38	rs10757278	0.61	7.1e-05	0.022
KLF9	ENSG00000119138.4	chr9_22124478_A_G_b38	rs10757278	0.61	Not an eGene	0.015
SLC25A4	ENSG00000151729.10	chr9_22124478_A_G_b38	rs10757278	0.61	5.2e-05	0.013
CALD1	ENSG00000122786.19	chr9_22124478_A_G_b38	rs10757278	0.62	Not an eGene	0.011
DACT3	ENSG00000197380.10	chr9_22124478_A_G_b38	rs10757278	0.62	Not an eGene	0.009
KLHDC2	ENSG00000165516.10	chr9_22124478_A_G_b38	rs10757278	0.62	Not an eGene	-0.015
PGRMC2	ENSG00000164040.16	chr9_22124478_A_G_b38	rs10757278	0.62	0.00016	0.018
RAMP1	ENSG00000132329.10	chr9_22124478_A_G_b38	rs10757278	0.62	9.5e-05	0.015
ACTG2	ENSG00000163017.13	chr9_22124478_A_G_b38	rs10757278	0.63	Not an eGene	0.015
CRYAB	ENSG00000109846.7	chr9_22124478_A_G_b38	rs10757278	0.63	Not an eGene	-0.014
CCL3	ENSG00000277632.1	chr9_22124478_A_G_b38	rs10757278	0.64	9.2e-05	0.024
JAG1	ENSG00000101384.11	chr9_22124478_A_G_b38	rs10757278	0.64	Not an eGene	-0.016
MT1X	ENSG00000187193.8	chr9_22124478_A_G_b38	rs10757278	0.65	8.2e-05	-0.015
PHGDH	ENSG00000092621.11	chr9_22124478_A_G_b38	rs10757278	0.66	0.00016	0.021
CAP2	ENSG00000112186.11	chr9_22124478_A_G_b38	rs10757278	0.68	0.00011	-0.01
CPE	ENSG00000109472.13	chr9_22124478_A_G_b38	rs10757278	0.68	0.00011	-0.013
PGRMC1	ENSG00000101856.9	chr9_22124478_A_G_b38	rs10757278	0.69	0.00015	-0.011
C2orf40	ENSG00000119147.9	chr9_22124478_A_G_b38	rs10757278	0.7	0.0001	-0.018
NR2F6	ENSG00000160113.5	chr9_22124478_A_G_b38	rs10757278	0.71	6.9e-05	0.012
CLN5	ENSG00000102805.14	chr9_22124478_A_G_b38	rs10757278	0.72	Not an eGene	-0.014
SPARCL1	ENSG00000152583.12	chr9_22124478_A_G_b38	rs10757278	0.72	0.00016	-0.012
LTB	ENSG00000227507.2	chr9_22124478_A_G_b38	rs10757278	0.73	Not an eGene	0.015
GLDN	ENSG00000186417.13	chr9_22124478_A_G_b38	rs10757278	0.76	0.00019	0.015
DDIT4	ENSG00000168209.4	chr9_22124478_A_G_b38	rs10757278	0.77	Not an eGene	0.011
DUSP3	ENSG00000108861.8	chr9_22124478_A_G_b38	rs10757278	0.77	Not an eGene	-0.009
PPP1R12C	ENSG00000125503.12	chr9_22124478_A_G_b38	rs10757278	0.77	Not an eGene	0.0081
SERPINA3	ENSG00000196136.17	chr9_22124478_A_G_b38	rs10757278	0.77	6.3e-05	-0.0086
AKR1C3	ENSG00000196139.13	chr9_22124478_A_G_b38	rs10757278	0.79	Not an eGene	0.01
IGFBP2	ENSG00000115457.9	chr9_22124478_A_G_b38	rs10757278	0.79	8.3e-05	0.0077
KLHL9	ENSG00000198642.6	chr9_22124478_A_G_b38	rs10757278	0.8	Not an eGene	-0.0074
PDLIM3	ENSG00000154553.13	chr9_22124478_A_G_b38	rs10757278	0.81	5.4e-05	-0.0083
FHL1	ENSG00000022267.16	chr9_22124478_A_G_b38	rs10757278	0.82	0.00023	0.0073
NEXN	ENSG00000162614.18	chr9_22124478_A_G_b38	rs10757278	0.82	0.00016	0.0035
PPP1R14A	ENSG00000167641.10	chr9_22124478_A_G_b38	rs10757278	0.82	0.00019	0.0046
MFAP4	ENSG00000166482.11	chr9_22124478_A_G_b38	rs10757278	0.83	Not an eGene	0.0069
NUPR1	ENSG00000176046.8	chr9_22124478_A_G_b38	rs10757278	0.83	0.00016	-0.0097
CHSY3	ENSG00000198108.3	chr9_22124478_A_G_b38	rs10757278	0.84	Not an eGene	0.0063
TGFBR3	ENSG00000069702.10	chr9_22124478_A_G_b38	rs10757278	0.84	Not an eGene	0.007
KCNMB1	ENSG00000145936.8	chr9_22124478_A_G_b38	rs10757278	0.85	9.6e-05	-0.0056
PXDN	ENSG00000130508.10	chr9_22124478_A_G_b38	rs10757278	0.85	Not an eGene	0.0061
SGCA	ENSG00000108823.15	chr9_22124478_A_G_b38	rs10757278	0.85	8.5e-05	-0.0057
NPTX2	ENSG00000106236.3	chr9_22124478_A_G_b38	rs10757278	0.86	0.00015	0.0092
CSRP1	ENSG00000159176.13	chr9_22124478_A_G_b38	rs10757278	0.87	Not an eGene	0.0044
GFOD1	ENSG00000145990.10	chr9_22124478_A_G_b38	rs10757278	0.87	0.00012	0.0055
PKD2	ENSG00000118762.7	chr9_22124478_A_G_b38	rs10757278	0.87	Not an eGene	0.0033
ANKRD46	ENSG00000186106.11	chr9_22124478_A_G_b38	rs10757278	0.89	Not an eGene	-0.0041
PADI4	ENSG00000159339.13	chr9_22124478_A_G_b38	rs10757278	0.89	Not an eGene	-0.0084
FAM46B	ENSG00000158246.7	chr9_22124478_A_G_b38	rs10757278	0.91	Not an eGene	0.0037
FKBP5	ENSG00000096060.14	chr9_22124478_A_G_b38	rs10757278	0.91	Not an eGene	-0.0023
MT1M	ENSG00000205364.3	chr9_22124478_A_G_b38	rs10757278	0.91	7.8e-05	-0.004
CSRP2	ENSG00000175183.9	chr9_22124478_A_G_b38	rs10757278	0.92	0.00012	-0.003
CYBRD1	ENSG00000071967.11	chr9_22124478_A_G_b38	rs10757278	0.92	0.00012	-0.0044
RASL12	ENSG00000103710.10	chr9_22124478_A_G_b38	rs10757278	0.93	Not an eGene	-0.0024
ATOH8	ENSG00000168874.12	chr9_22124478_A_G_b38	rs10757278	0.94	Not an eGene	-0.0023
CSNK2A2	ENSG00000070770.8	chr9_22124478_A_G_b38	rs10757278	0.94	Not an eGene	0.0022
FCN1	ENSG00000085265.10	chr9_22124478_A_G_b38	rs10757278	0.94	Not an eGene	0.0037
FOXO1	ENSG00000150907.7	chr9_22124478_A_G_b38	rs10757278	0.94	Not an eGene	-0.0022
RGS5	ENSG00000143248.12	chr9_22124478_A_G_b38	rs10757278	0.94	0.0001	-0.002
AOC3	ENSG00000131471.6	chr9_22124478_A_G_b38	rs10757278	0.95	0.00022	-0.0022
ATP1A2	ENSG00000018625.14	chr9_22124478_A_G_b38	rs10757278	0.95	9.4e-05	0.0018
PEBP1	ENSG00000089220.4	chr9_22124478_A_G_b38	rs10757278	0.96	9e-05	-0.0018
YAP1	ENSG00000137693.13	chr9_22124478_A_G_b38	rs10757278	0.97	Not an eGene	0.00079
TRPC1	ENSG00000144935.14	chr9_22124478_A_G_b38	rs10757278	0.98	Not an eGene	-0.0005
COX5B	ENSG00000135940.6	chr9_22124478_A_G_b38	rs10757278	0.99	Not an eGene	-0.00035
SCRG1	ENSG00000164106.7	chr9_22124478_A_G_b38	rs10757278	0.99	Not an eGene	-0.00052
rs7025486
LSM2	ENSG00000204392.10	chr9_121660124_G_A_b38	rs7025486	0.0072	0.00019	0.093
PHGDH	ENSG00000092621.11	chr9_121660124_G_A_b38	rs7025486	0.009	0.00016	0.14
KLF15	ENSG00000163884.3	chr9_121660124_G_A_b38	rs7025486	0.011	Not an eGene	-0.069
PPP1R12C	ENSG00000125503.12	chr9_121660124_G_A_b38	rs7025486	0.011	Not an eGene	-0.079
NPTX2	ENSG00000106236.3	chr9_121660124_G_A_b38	rs7025486	0.021	0.00015	0.13
RPL35A	ENSG00000182899.14	chr9_121660124_G_A_b38	rs7025486	0.024	Not an eGene	-0.044
PEBP1	ENSG00000089220.4	chr9_121660124_G_A_b38	rs7025486	0.035	9e-05	-0.077
AIF1L	ENSG00000126878.12	chr9_121660124_G_A_b38	rs7025486	0.036	8.3e-05	-0.15
MFAP4	ENSG00000166482.11	chr9_121660124_G_A_b38	rs7025486	0.04	Not an eGene	0.076
FOSB	ENSG00000125740.13	chr9_121660124_G_A_b38	rs7025486	0.048	7.1e-05	0.099
NEXN	ENSG00000162614.18	chr9_121660124_G_A_b38	rs7025486	0.048	0.00016	-0.035
ADH1B	ENSG00000196616.13	chr9_121660124_G_A_b38	rs7025486	0.065	0.00014	-0.071
SCRG1	ENSG00000164106.7	chr9_121660124_G_A_b38	rs7025486	0.065	Not an eGene	0.067
TC2N	ENSG00000165929.12	chr9_121660124_G_A_b38	rs7025486	0.068	9.1e-05	-0.06
HIGD1A	ENSG00000181061.13	chr9_121660124_G_A_b38	rs7025486	0.079	0.00014	-0.054
NDN	ENSG00000182636.5	chr9_121660124_G_A_b38	rs7025486	0.09	7.4e-05	-0.09
CHSY3	ENSG00000198108.3	chr9_121660124_G_A_b38	rs7025486	0.091	Not an eGene	0.061
CBX6	ENSG00000183741.11	chr9_121660124_G_A_b38	rs7025486	0.094	0.0001	-0.049
ZNF462	ENSG00000148143.12	chr9_121660124_G_A_b38	rs7025486	0.094	Not an eGene	-0.068
MT1M	ENSG00000205364.3	chr9_121660124_G_A_b38	rs7025486	0.11	7.8e-05	-0.064
HSPB2	ENSG00000170276.5	chr9_121660124_G_A_b38	rs7025486	0.12	0.00014	0.048
KCNA5	ENSG00000130037.4	chr9_121660124_G_A_b38	rs7025486	0.12	8.9e-05	-0.061
LIMCH1	ENSG00000064042.17	chr9_121660124_G_A_b38	rs7025486	0.12	9e-05	0.051
CALD1	ENSG00000122786.19	chr9_121660124_G_A_b38	rs7025486	0.13	Not an eGene	-0.039
SERPINA3	ENSG00000196136.17	chr9_121660124_G_A_b38	rs7025486	0.13	6.3e-05	0.051
SRPX	ENSG00000101955.14	chr9_121660124_G_A_b38	rs7025486	0.13	0.00019	0.065
CNN1	ENSG00000130176.7	chr9_121660124_G_A_b38	rs7025486	0.14	Not an eGene	-0.032
CSNK2A2	ENSG00000070770.8	chr9_121660124_G_A_b38	rs7025486	0.14	Not an eGene	-0.047
ITK	ENSG00000113263.12	chr9_121660124_G_A_b38	rs7025486	0.14	Not an eGene	-0.054
CCR7	ENSG00000126353.3	chr9_121660124_G_A_b38	rs7025486	0.15	0.00015	0.074
CSRP1	ENSG00000159176.13	chr9_121660124_G_A_b38	rs7025486	0.16	Not an eGene	-0.041
GLDN	ENSG00000186417.13	chr9_121660124_G_A_b38	rs7025486	0.16	0.00019	0.079
ATP1A2	ENSG00000018625.14	chr9_121660124_G_A_b38	rs7025486	0.17	9.4e-05	-0.043
FKBP5	ENSG00000096060.14	chr9_121660124_G_A_b38	rs7025486	0.17	Not an eGene	-0.031
WDR82	ENSG00000164091.11	chr9_121660124_G_A_b38	rs7025486	0.19	0.0003	0.034
AKR1C3	ENSG00000196139.13	chr9_121660124_G_A_b38	rs7025486	0.21	Not an eGene	-0.054
FOXO1	ENSG00000150907.7	chr9_121660124_G_A_b38	rs7025486	0.23	Not an eGene	-0.041
JAG1	ENSG00000101384.11	chr9_121660124_G_A_b38	rs7025486	0.24	Not an eGene	-0.045
HBB	ENSG00000244734.3	chr9_121660124_G_A_b38	rs7025486	0.26	Not an eGene	-0.068
HLA-DQB1	ENSG00000179344.16	chr9_121660124_G_A_b38	rs7025486	0.26	0.00015	0.067
FAM129A	ENSG00000135842.16	chr9_121660124_G_A_b38	rs7025486	0.27	0.00015	-0.023
SIK1	ENSG00000142178.7	chr9_121660124_G_A_b38	rs7025486	0.27	0.0001	-0.086
MAOA	ENSG00000189221.9	chr9_121660124_G_A_b38	rs7025486	0.3	0.00018	-0.025
MGP	ENSG00000111341.9	chr9_121660124_G_A_b38	rs7025486	0.3	0.00014	-0.036
ACTG2	ENSG00000163017.13	chr9_121660124_G_A_b38	rs7025486	0.32	Not an eGene	-0.035
CRYAB	ENSG00000109846.7	chr9_121660124_G_A_b38	rs7025486	0.32	Not an eGene	-0.033
HSPB7	ENSG00000173641.17	chr9_121660124_G_A_b38	rs7025486	0.32	0.00011	0.036
YIPF6	ENSG00000181704.11	chr9_121660124_G_A_b38	rs7025486	0.33	0.00015	-0.03
CLN5	ENSG00000102805.14	chr9_121660124_G_A_b38	rs7025486	0.35	Not an eGene	0.041
KLHL9	ENSG00000198642.6	chr9_121660124_G_A_b38	rs7025486	0.35	Not an eGene	-0.031
BBX	ENSG00000114439.18	chr9_121660124_G_A_b38	rs7025486	0.37	Not an eGene	-0.024
HBA2	ENSG00000188536.12	chr9_121660124_G_A_b38	rs7025486	0.37	Not an eGene	-0.052
IGFBP2	ENSG00000115457.9	chr9_121660124_G_A_b38	rs7025486	0.39	8.3e-05	0.028
KCNMB1	ENSG00000145936.8	chr9_121660124_G_A_b38	rs7025486	0.39	9.6e-05	-0.03
METTL7A	ENSG00000185432.11	chr9_121660124_G_A_b38	rs7025486	0.39	0.00019	-0.021
CTSZ	ENSG00000101160.13	chr9_121660124_G_A_b38	rs7025486	0.4	Not an eGene	-0.026
TMEM47	ENSG00000147027.3	chr9_121660124_G_A_b38	rs7025486	0.4	0.00028	-0.023
DACT3	ENSG00000197380.10	chr9_121660124_G_A_b38	rs7025486	0.42	Not an eGene	-0.016
PALLD	ENSG00000129116.17	chr9_121660124_G_A_b38	rs7025486	0.42	0.00013	-0.019
FAM46B	ENSG00000158246.7	chr9_121660124_G_A_b38	rs7025486	0.45	Not an eGene	-0.029
MMP9	ENSG00000100985.7	chr9_121660124_G_A_b38	rs7025486	0.45	Not an eGene	0.049
NOV	ENSG00000136999.4	chr9_121660124_G_A_b38	rs7025486	0.45	0.00014	-0.022
SPARC	ENSG00000113140.10	chr9_121660124_G_A_b38	rs7025486	0.45	0.00011	-0.034
CAP2	ENSG00000112186.11	chr9_121660124_G_A_b38	rs7025486	0.46	0.00011	-0.021
FERMT2	ENSG00000073712.14	chr9_121660124_G_A_b38	rs7025486	0.46	Not an eGene	-0.016
FHL1	ENSG00000022267.16	chr9_121660124_G_A_b38	rs7025486	0.46	0.00023	0.026
CSPG4	ENSG00000173546.7	chr9_121660124_G_A_b38	rs7025486	0.48	Not an eGene	0.02
CYBRD1	ENSG00000071967.11	chr9_121660124_G_A_b38	rs7025486	0.48	0.00012	0.035
PACSIN2	ENSG00000100266.18	chr9_121660124_G_A_b38	rs7025486	0.48	0.0001	0.027
AOC3	ENSG00000131471.6	chr9_121660124_G_A_b38	rs7025486	0.51	0.00022	-0.027
GMDS	ENSG00000112699.10	chr9_121660124_G_A_b38	rs7025486	0.51	6.4e-05	0.026
KLHDC2	ENSG00000165516.10	chr9_121660124_G_A_b38	rs7025486	0.51	Not an eGene	-0.022
IL1B	ENSG00000125538.11	chr9_121660124_G_A_b38	rs7025486	0.53	Not an eGene	-0.032
GFOD1	ENSG00000145990.10	chr9_121660124_G_A_b38	rs7025486	0.54	0.00012	0.024
LMOD1	ENSG00000163431.12	chr9_121660124_G_A_b38	rs7025486	0.54	8.8e-05	-0.017
TMEM14A	ENSG00000096092.5	chr9_121660124_G_A_b38	rs7025486	0.55	9.6e-05	0.022
RABGAP1	ENSG00000011454.16	chr9_121660124_G_A_b38	rs7025486	0.56	0.00012	-0.023
GPD1L	ENSG00000152642.10	chr9_121660124_G_A_b38	rs7025486	0.57	7.8e-05	0.018
IL2RB	ENSG00000100385.13	chr9_121660124_G_A_b38	rs7025486	0.58	Not an eGene	0.021
NXPH3	ENSG00000182575.7	chr9_121660124_G_A_b38	rs7025486	0.58	Not an eGene	-0.019
SPARCL1	ENSG00000152583.12	chr9_121660124_G_A_b38	rs7025486	0.59	0.00016	-0.02
CCDC102A	ENSG00000135736.5	chr9_121660124_G_A_b38	rs7025486	0.6	8.6e-05	0.016
IL6	ENSG00000136244.11	chr9_121660124_G_A_b38	rs7025486	0.6	Not an eGene	-0.022
MT1X	ENSG00000187193.8	chr9_121660124_G_A_b38	rs7025486	0.6	8.2e-05	-0.02
FRZB	ENSG00000162998.4	chr9_121660124_G_A_b38	rs7025486	0.61	0.00016	0.02
PGRMC2	ENSG00000164040.16	chr9_121660124_G_A_b38	rs7025486	0.61	0.00016	0.021
RASL12	ENSG00000103710.10	chr9_121660124_G_A_b38	rs7025486	0.62	Not an eGene	0.015
ANKRD46	ENSG00000186106.11	chr9_121660124_G_A_b38	rs7025486	0.63	Not an eGene	0.016
IGFBP6	ENSG00000167779.7	chr9_121660124_G_A_b38	rs7025486	0.63	Not an eGene	-0.02
RAMP1	ENSG00000132329.10	chr9_121660124_G_A_b38	rs7025486	0.63	9.5e-05	0.016
FHL5	ENSG00000112214.10	chr9_121660124_G_A_b38	rs7025486	0.64	0.00018	-0.023
NFIA	ENSG00000162599.15	chr9_121660124_G_A_b38	rs7025486	0.64	Not an eGene	-0.013
NUPR1	ENSG00000176046.8	chr9_121660124_G_A_b38	rs7025486	0.64	0.00016	0.023
RBPMS2	ENSG00000166831.8	chr9_121660124_G_A_b38	rs7025486	0.66	0.0002	-0.022
TIMP4	ENSG00000157150.4	chr9_121660124_G_A_b38	rs7025486	0.67	0.00011	-0.016
FMOD	ENSG00000122176.10	chr9_121660124_G_A_b38	rs7025486	0.68	7.7e-05	-0.016
PADI4	ENSG00000159339.13	chr9_121660124_G_A_b38	rs7025486	0.69	Not an eGene	-0.027
PPP1R3C	ENSG00000119938.8	chr9_121660124_G_A_b38	rs7025486	0.69	0.0002	0.017
PKD2	ENSG00000118762.7	chr9_121660124_G_A_b38	rs7025486	0.71	Not an eGene	-0.0085
CSRP2	ENSG00000175183.9	chr9_121660124_G_A_b38	rs7025486	0.72	0.00012	0.013
IGFBP3	ENSG00000146674.14	chr9_121660124_G_A_b38	rs7025486	0.72	0.00012	0.022
LMCD1	ENSG00000071282.11	chr9_121660124_G_A_b38	rs7025486	0.72	6.1e-05	-0.013
TGFBR3	ENSG00000069702.10	chr9_121660124_G_A_b38	rs7025486	0.72	Not an eGene	-0.015
GGNBP2	ENSG00000278311.4	chr9_121660124_G_A_b38	rs7025486	0.74	9.5e-05	0.012
MYH10	ENSG00000133026.12	chr9_121660124_G_A_b38	rs7025486	0.74	7.9e-05	-0.0095
NR2F6	ENSG00000160113.5	chr9_121660124_G_A_b38	rs7025486	0.74	6.9e-05	0.012
FCN1	ENSG00000085265.10	chr9_121660124_G_A_b38	rs7025486	0.75	Not an eGene	0.018
MYH11	ENSG00000133392.17	chr9_121660124_G_A_b38	rs7025486	0.75	Not an eGene	-0.0068
DSTN	ENSG00000125868.15	chr9_121660124_G_A_b38	rs7025486	0.76	Not an eGene	-0.0072
SLC25A4	ENSG00000151729.10	chr9_121660124_G_A_b38	rs7025486	0.76	5.2e-05	0.0089
CXXC5	ENSG00000171604.11	chr9_121660124_G_A_b38	rs7025486	0.77	0.00023	0.0086
THBS2	ENSG00000186340.14	chr9_121660124_G_A_b38	rs7025486	0.77	8.2e-05	0.0098
CCL3	ENSG00000277632.1	chr9_121660124_G_A_b38	rs7025486	0.78	9.2e-05	0.016
PDLIM3	ENSG00000154553.13	chr9_121660124_G_A_b38	rs7025486	0.78	5.4e-05	-0.011
EFHD1	ENSG00000115468.11	chr9_121660124_G_A_b38	rs7025486	0.8	0.0001	-0.0068
ITGA10	ENSG00000143127.12	chr9_121660124_G_A_b38	rs7025486	0.8	0.0002	-0.0074
COX7A1	ENSG00000161281.10	chr9_121660124_G_A_b38	rs7025486	0.81	0.00012	-0.0082
DDIT4	ENSG00000168209.4	chr9_121660124_G_A_b38	rs7025486	0.81	Not an eGene	0.01
RCAN2	ENSG00000172348.14	chr9_121660124_G_A_b38	rs7025486	0.81	9.6e-05	-0.0072
WFS1	ENSG00000109501.13	chr9_121660124_G_A_b38	rs7025486	0.83	Not an eGene	0.0054
ITGA8	ENSG00000077943.7	chr9_121660124_G_A_b38	rs7025486	0.85	0.0001	0.0062
C2orf40	ENSG00000119147.9	chr9_121660124_G_A_b38	rs7025486	0.87	0.0001	0.0089
PGRMC1	ENSG00000101856.9	chr9_121660124_G_A_b38	rs7025486	0.87	0.00015	0.0054
ATOH8	ENSG00000168874.12	chr9_121660124_G_A_b38	rs7025486	0.88	Not an eGene	0.0051
LTB	ENSG00000227507.2	chr9_121660124_G_A_b38	rs7025486	0.89	Not an eGene	-0.007
PXDN	ENSG00000130508.10	chr9_121660124_G_A_b38	rs7025486	0.89	Not an eGene	0.0051
TCEAL2	ENSG00000184905.8	chr9_121660124_G_A_b38	rs7025486	0.89	Not an eGene	0.0044
DUSP3	ENSG00000108861.8	chr9_121660124_G_A_b38	rs7025486	0.9	Not an eGene	-0.0045
KLF9	ENSG00000119138.4	chr9_121660124_G_A_b38	rs7025486	0.9	Not an eGene	0.0042
YAP1	ENSG00000137693.13	chr9_121660124_G_A_b38	rs7025486	0.9	Not an eGene	-0.0029
ZBTB16	ENSG00000109906.13	chr9_121660124_G_A_b38	rs7025486	0.9	Not an eGene	-0.0038
ADH1A	ENSG00000187758.7	chr9_121660124_G_A_b38	rs7025486	0.91	0.00016	-0.0066
PPP1R14A	ENSG00000167641.10	chr9_121660124_G_A_b38	rs7025486	0.91	0.00019	0.0024
RGS5	ENSG00000143248.12	chr9_121660124_G_A_b38	rs7025486	0.93	0.0001	-0.0026
GBP5	ENSG00000154451.14	chr9_121660124_G_A_b38	rs7025486	0.95	Not an eGene	0.0027
COX5B	ENSG00000135940.6	chr9_121660124_G_A_b38	rs7025486	0.97	Not an eGene	0.00095
SGCA	ENSG00000108823.15	chr9_121660124_G_A_b38	rs7025486	0.97	8.5e-05	-0.0013
SMOC2	ENSG00000112562.18	chr9_121660124_G_A_b38	rs7025486	0.97	7.5e-05	-0.0017
TRPC1	ENSG00000144935.14	chr9_121660124_G_A_b38	rs7025486	0.98	Not an eGene	0.00067
CPE	ENSG00000109472.13	chr9_121660124_G_A_b38	rs7025486	0.99	0.00011	-0.00031
UCP2	ENSG00000175567.8	chr9_121660124_G_A_b38	rs7025486	0.99	0.00017	0.00057
A2M	ENSG00000175899.14	chr9_121660124_G_A_b38	rs7025486	1	Not an eGene	0.00012
rs1466535
HSPB2	ENSG00000170276.5	chr12_57140687_G_A_b38	rs1466535	0.0051	0.00014	-0.082
DUSP3	ENSG00000108861.8	chr12_57140687_G_A_b38	rs1466535	0.011	Not an eGene	-0.083
GPD1L	ENSG00000152642.10	chr12_57140687_G_A_b38	rs1466535	0.019	7.8e-05	-0.07
FOSB	ENSG00000125740.13	chr12_57140687_G_A_b38	rs1466535	0.022	7.1e-05	0.11
FERMT2	ENSG00000073712.14	chr12_57140687_G_A_b38	rs1466535	0.027	Not an eGene	-0.045
KLHDC2	ENSG00000165516.10	chr12_57140687_G_A_b38	rs1466535	0.028	Not an eGene	-0.071
HLA-DQB1	ENSG00000179344.16	chr12_57140687_G_A_b38	rs1466535	0.044	0.00015	0.11
RASL12	ENSG00000103710.10	chr12_57140687_G_A_b38	rs1466535	0.044	Not an eGene	-0.059
AIF1L	ENSG00000126878.12	chr12_57140687_G_A_b38	rs1466535	0.061	8.3e-05	0.13
SERPINA3	ENSG00000196136.17	chr12_57140687_G_A_b38	rs1466535	0.066	6.3e-05	-0.059
CCDC102A	ENSG00000135736.5	chr12_57140687_G_A_b38	rs1466535	0.068	8.6e-05	0.052
SMOC2	ENSG00000112562.18	chr12_57140687_G_A_b38	rs1466535	0.069	7.5e-05	-0.072
GMDS	ENSG00000112699.10	chr12_57140687_G_A_b38	rs1466535	0.077	6.4e-05	-0.067
AKR1C3	ENSG00000196139.13	chr12_57140687_G_A_b38	rs1466535	0.082	Not an eGene	-0.072
RGS5	ENSG00000143248.12	chr12_57140687_G_A_b38	rs1466535	0.093	0.0001	0.05
CSPG4	ENSG00000173546.7	chr12_57140687_G_A_b38	rs1466535	0.1	Not an eGene	0.045
PGRMC2	ENSG00000164040.16	chr12_57140687_G_A_b38	rs1466535	0.1	0.00016	-0.066
CTSZ	ENSG00000101160.13	chr12_57140687_G_A_b38	rs1466535	0.11	Not an eGene	-0.047
FMOD	ENSG00000122176.10	chr12_57140687_G_A_b38	rs1466535	0.12	7.7e-05	-0.059
FOXO1	ENSG00000150907.7	chr12_57140687_G_A_b38	rs1466535	0.12	Not an eGene	-0.05
PPP1R14A	ENSG00000167641.10	chr12_57140687_G_A_b38	rs1466535	0.13	0.00019	0.032
IGFBP2	ENSG00000115457.9	chr12_57140687_G_A_b38	rs1466535	0.14	8.3e-05	0.046
NXPH3	ENSG00000182575.7	chr12_57140687_G_A_b38	rs1466535	0.15	Not an eGene	0.048
FAM129A	ENSG00000135842.16	chr12_57140687_G_A_b38	rs1466535	0.16	0.00015	-0.028
FHL5	ENSG00000112214.10	chr12_57140687_G_A_b38	rs1466535	0.16	0.00018	-0.067
ZBTB16	ENSG00000109906.13	chr12_57140687_G_A_b38	rs1466535	0.17	Not an eGene	0.037
SCRG1	ENSG00000164106.7	chr12_57140687_G_A_b38	rs1466535	0.19	Not an eGene	-0.045
TCEAL2	ENSG00000184905.8	chr12_57140687_G_A_b38	rs1466535	0.21	Not an eGene	-0.037
NFIA	ENSG00000162599.15	chr12_57140687_G_A_b38	rs1466535	0.22	Not an eGene	-0.031
FCN1	ENSG00000085265.10	chr12_57140687_G_A_b38	rs1466535	0.23	Not an eGene	-0.064
IL6	ENSG00000136244.11	chr12_57140687_G_A_b38	rs1466535	0.23	Not an eGene	0.049
FHL1	ENSG00000022267.16	chr12_57140687_G_A_b38	rs1466535	0.24	0.00023	0.04
IGFBP6	ENSG00000167779.7	chr12_57140687_G_A_b38	rs1466535	0.24	Not an eGene	-0.047
NOV	ENSG00000136999.4	chr12_57140687_G_A_b38	rs1466535	0.26	0.00014	-0.031
CCR7	ENSG00000126353.3	chr12_57140687_G_A_b38	rs1466535	0.27	0.00015	-0.054
ATOH8	ENSG00000168874.12	chr12_57140687_G_A_b38	rs1466535	0.3	Not an eGene	-0.033
RABGAP1	ENSG00000011454.16	chr12_57140687_G_A_b38	rs1466535	0.31	0.00012	0.038
LMCD1	ENSG00000071282.11	chr12_57140687_G_A_b38	rs1466535	0.32	6.1e-05	-0.036
PPP1R3C	ENSG00000119938.8	chr12_57140687_G_A_b38	rs1466535	0.33	0.0002	-0.04
HSPB7	ENSG00000173641.17	chr12_57140687_G_A_b38	rs1466535	0.35	0.00011	-0.033
IL2RB	ENSG00000100385.13	chr12_57140687_G_A_b38	rs1466535	0.35	Not an eGene	-0.034
KLHL9	ENSG00000198642.6	chr12_57140687_G_A_b38	rs1466535	0.36	Not an eGene	-0.029
MT1M	ENSG00000205364.3	chr12_57140687_G_A_b38	rs1466535	0.36	7.8e-05	-0.036
TRPC1	ENSG00000144935.14	chr12_57140687_G_A_b38	rs1466535	0.36	Not an eGene	-0.025
COX5B	ENSG00000135940.6	chr12_57140687_G_A_b38	rs1466535	0.37	Not an eGene	-0.024
DSTN	ENSG00000125868.15	chr12_57140687_G_A_b38	rs1466535	0.37	Not an eGene	0.02
ITK	ENSG00000113263.12	chr12_57140687_G_A_b38	rs1466535	0.37	Not an eGene	-0.032
ACTG2	ENSG00000163017.13	chr12_57140687_G_A_b38	rs1466535	0.38	Not an eGene	-0.03
SPARC	ENSG00000113140.10	chr12_57140687_G_A_b38	rs1466535	0.38	0.00011	0.037
WDR82	ENSG00000164091.11	chr12_57140687_G_A_b38	rs1466535	0.38	0.0003	-0.022
RAMP1	ENSG00000132329.10	chr12_57140687_G_A_b38	rs1466535	0.39	9.5e-05	0.027
CLN5	ENSG00000102805.14	chr12_57140687_G_A_b38	rs1466535	0.4	Not an eGene	-0.035
COX7A1	ENSG00000161281.10	chr12_57140687_G_A_b38	rs1466535	0.4	0.00012	0.027
ITGA10	ENSG00000143127.12	chr12_57140687_G_A_b38	rs1466535	0.4	0.0002	-0.024
WFS1	ENSG00000109501.13	chr12_57140687_G_A_b38	rs1466535	0.4	Not an eGene	0.02
CRYAB	ENSG00000109846.7	chr12_57140687_G_A_b38	rs1466535	0.41	Not an eGene	-0.026
GBP5	ENSG00000154451.14	chr12_57140687_G_A_b38	rs1466535	0.41	Not an eGene	-0.033
GFOD1	ENSG00000145990.10	chr12_57140687_G_A_b38	rs1466535	0.41	0.00012	-0.03
CSRP1	ENSG00000159176.13	chr12_57140687_G_A_b38	rs1466535	0.42	Not an eGene	-0.023
PADI4	ENSG00000159339.13	chr12_57140687_G_A_b38	rs1466535	0.42	Not an eGene	0.052
RBPMS2	ENSG00000166831.8	chr12_57140687_G_A_b38	rs1466535	0.42	0.0002	-0.038
YAP1	ENSG00000137693.13	chr12_57140687_G_A_b38	rs1466535	0.42	Not an eGene	-0.019
IGFBP3	ENSG00000146674.14	chr12_57140687_G_A_b38	rs1466535	0.43	0.00012	-0.048
PPP1R12C	ENSG00000125503.12	chr12_57140687_G_A_b38	rs1466535	0.43	Not an eGene	0.024
CCL3	ENSG00000277632.1	chr12_57140687_G_A_b38	rs1466535	0.44	9.2e-05	-0.043
PXDN	ENSG00000130508.10	chr12_57140687_G_A_b38	rs1466535	0.44	Not an eGene	0.028
BBX	ENSG00000114439.18	chr12_57140687_G_A_b38	rs1466535	0.45	Not an eGene	0.019
KCNA5	ENSG00000130037.4	chr12_57140687_G_A_b38	rs1466535	0.45	8.9e-05	-0.029
PDLIM3	ENSG00000154553.13	chr12_57140687_G_A_b38	rs1466535	0.45	5.4e-05	-0.029
ADH1A	ENSG00000187758.7	chr12_57140687_G_A_b38	rs1466535	0.46	0.00016	-0.043
MFAP4	ENSG00000166482.11	chr12_57140687_G_A_b38	rs1466535	0.47	Not an eGene	0.026
SIK1	ENSG00000142178.7	chr12_57140687_G_A_b38	rs1466535	0.48	0.0001	0.052
LSM2	ENSG00000204392.10	chr12_57140687_G_A_b38	rs1466535	0.49	0.00019	0.023
MT1X	ENSG00000187193.8	chr12_57140687_G_A_b38	rs1466535	0.49	8.2e-05	-0.025
RPL35A	ENSG00000182899.14	chr12_57140687_G_A_b38	rs1466535	0.49	Not an eGene	0.013
MYH11	ENSG00000133392.17	chr12_57140687_G_A_b38	rs1466535	0.5	Not an eGene	0.014
CSRP2	ENSG00000175183.9	chr12_57140687_G_A_b38	rs1466535	0.51	0.00012	0.023
FRZB	ENSG00000162998.4	chr12_57140687_G_A_b38	rs1466535	0.51	0.00016	0.025
HIGD1A	ENSG00000181061.13	chr12_57140687_G_A_b38	rs1466535	0.51	0.00014	-0.019
LMOD1	ENSG00000163431.12	chr12_57140687_G_A_b38	rs1466535	0.51	8.8e-05	0.017
NDN	ENSG00000182636.5	chr12_57140687_G_A_b38	rs1466535	0.52	7.4e-05	-0.033
ATP1A2	ENSG00000018625.14	chr12_57140687_G_A_b38	rs1466535	0.53	9.4e-05	0.019
CYBRD1	ENSG00000071967.11	chr12_57140687_G_A_b38	rs1466535	0.53	0.00012	0.03
TIMP4	ENSG00000157150.4	chr12_57140687_G_A_b38	rs1466535	0.53	0.00011	-0.022
CALD1	ENSG00000122786.19	chr12_57140687_G_A_b38	rs1466535	0.54	Not an eGene	0.015
SRPX	ENSG00000101955.14	chr12_57140687_G_A_b38	rs1466535	0.55	0.00019	-0.025
CBX6	ENSG00000183741.11	chr12_57140687_G_A_b38	rs1466535	0.57	0.0001	0.016
IL1B	ENSG00000125538.11	chr12_57140687_G_A_b38	rs1466535	0.57	Not an eGene	0.028
LTB	ENSG00000227507.2	chr12_57140687_G_A_b38	rs1466535	0.57	Not an eGene	0.028
RCAN2	ENSG00000172348.14	chr12_57140687_G_A_b38	rs1466535	0.58	9.6e-05	0.015
ANKRD46	ENSG00000186106.11	chr12_57140687_G_A_b38	rs1466535	0.59	Not an eGene	0.017
FAM46B	ENSG00000158246.7	chr12_57140687_G_A_b38	rs1466535	0.59	Not an eGene	0.02
ZNF462	ENSG00000148143.12	chr12_57140687_G_A_b38	rs1466535	0.59	Not an eGene	0.021
TC2N	ENSG00000165929.12	chr12_57140687_G_A_b38	rs1466535	0.62	9.1e-05	0.016
DDIT4	ENSG00000168209.4	chr12_57140687_G_A_b38	rs1466535	0.63	Not an eGene	-0.02
NPTX2	ENSG00000106236.3	chr12_57140687_G_A_b38	rs1466535	0.63	0.00015	0.027
C2orf40	ENSG00000119147.9	chr12_57140687_G_A_b38	rs1466535	0.64	0.0001	-0.025
CNN1	ENSG00000130176.7	chr12_57140687_G_A_b38	rs1466535	0.66	Not an eGene	0.0091
KLF15	ENSG00000163884.3	chr12_57140687_G_A_b38	rs1466535	0.66	Not an eGene	0.012
NR2F6	ENSG00000160113.5	chr12_57140687_G_A_b38	rs1466535	0.66	6.9e-05	0.016
PGRMC1	ENSG00000101856.9	chr12_57140687_G_A_b38	rs1466535	0.67	0.00015	-0.014
PKD2	ENSG00000118762.7	chr12_57140687_G_A_b38	rs1466535	0.67	Not an eGene	0.0095
PEBP1	ENSG00000089220.4	chr12_57140687_G_A_b38	rs1466535	0.68	9e-05	-0.014
CPE	ENSG00000109472.13	chr12_57140687_G_A_b38	rs1466535	0.7	0.00011	0.013
MMP9	ENSG00000100985.7	chr12_57140687_G_A_b38	rs1466535	0.71	Not an eGene	-0.023
PHGDH	ENSG00000092621.11	chr12_57140687_G_A_b38	rs1466535	0.73	0.00016	-0.018
YIPF6	ENSG00000181704.11	chr12_57140687_G_A_b38	rs1466535	0.73	0.00015	-0.01
CXXC5	ENSG00000171604.11	chr12_57140687_G_A_b38	rs1466535	0.74	0.00023	0.0094
NEXN	ENSG00000162614.18	chr12_57140687_G_A_b38	rs1466535	0.74	0.00016	0.0055
SLC25A4	ENSG00000151729.10	chr12_57140687_G_A_b38	rs1466535	0.75	5.2e-05	0.0086
UCP2	ENSG00000175567.8	chr12_57140687_G_A_b38	rs1466535	0.75	0.00017	-0.011
AOC3	ENSG00000131471.6	chr12_57140687_G_A_b38	rs1466535	0.78	0.00022	0.011
ADH1B	ENSG00000196616.13	chr12_57140687_G_A_b38	rs1466535	0.79	0.00014	0.0099
KLF9	ENSG00000119138.4	chr12_57140687_G_A_b38	rs1466535	0.8	Not an eGene	-0.0082
TMEM14A	ENSG00000096092.5	chr12_57140687_G_A_b38	rs1466535	0.8	9.6e-05	-0.0093
CHSY3	ENSG00000198108.3	chr12_57140687_G_A_b38	rs1466535	0.83	Not an eGene	0.0074
MAOA	ENSG00000189221.9	chr12_57140687_G_A_b38	rs1466535	0.83	0.00018	0.0047
NUPR1	ENSG00000176046.8	chr12_57140687_G_A_b38	rs1466535	0.83	0.00016	0.01
A2M	ENSG00000175899.14	chr12_57140687_G_A_b38	rs1466535	0.84	Not an eGene	0.008
ITGA8	ENSG00000077943.7	chr12_57140687_G_A_b38	rs1466535	0.84	0.0001	0.0065
LIMCH1	ENSG00000064042.17	chr12_57140687_G_A_b38	rs1466535	0.85	9e-05	-0.0061
CSNK2A2	ENSG00000070770.8	chr12_57140687_G_A_b38	rs1466535	0.88	Not an eGene	0.0047
KCNMB1	ENSG00000145936.8	chr12_57140687_G_A_b38	rs1466535	0.88	9.6e-05	0.0052
SGCA	ENSG00000108823.15	chr12_57140687_G_A_b38	rs1466535	0.88	8.5e-05	-0.0049
GLDN	ENSG00000186417.13	chr12_57140687_G_A_b38	rs1466535	0.89	0.00019	-0.0076
MYH10	ENSG00000133026.12	chr12_57140687_G_A_b38	rs1466535	0.91	7.9e-05	0.0033
CAP2	ENSG00000112186.11	chr12_57140687_G_A_b38	rs1466535	0.92	0.00011	0.0028
HBA2	ENSG00000188536.12	chr12_57140687_G_A_b38	rs1466535	0.92	Not an eGene	0.006
TGFBR3	ENSG00000069702.10	chr12_57140687_G_A_b38	rs1466535	0.92	Not an eGene	-0.0041
EFHD1	ENSG00000115468.11	chr12_57140687_G_A_b38	rs1466535	0.93	0.0001	-0.0022
FKBP5	ENSG00000096060.14	chr12_57140687_G_A_b38	rs1466535	0.94	Not an eGene	-0.0017
HBB	ENSG00000244734.3	chr12_57140687_G_A_b38	rs1466535	0.94	Not an eGene	0.0041
PALLD	ENSG00000129116.17	chr12_57140687_G_A_b38	rs1466535	0.96	0.00013	-0.0012
SPARCL1	ENSG00000152583.12	chr12_57140687_G_A_b38	rs1466535	0.96	0.00016	0.0017
GGNBP2	ENSG00000278311.4	chr12_57140687_G_A_b38	rs1466535	0.97	9.5e-05	0.0011
MGP	ENSG00000111341.9	chr12_57140687_G_A_b38	rs1466535	0.97	0.00014	-0.0014
DACT3	ENSG00000197380.10	chr12_57140687_G_A_b38	rs1466535	0.98	Not an eGene	0.00038
METTL7A	ENSG00000185432.11	chr12_57140687_G_A_b38	rs1466535	0.98	0.00019	0.00067
PACSIN2	ENSG00000100266.18	chr12_57140687_G_A_b38	rs1466535	0.98	0.0001	0.00087
THBS2	ENSG00000186340.14	chr12_57140687_G_A_b38	rs1466535	0.98	8.2e-05	0.00099
JAG1	ENSG00000101384.11	chr12_57140687_G_A_b38	rs1466535	0.99	Not an eGene	-0.00023
TMEM47	ENSG00000147027.3	chr12_57140687_G_A_b38	rs1466535	0.99	0.00028	-0.00021
rs599839
CCL3	ENSG00000277632.1	chr1_109279544_G_A_b38	rs599839	0.0014	9.2e-05	0.21
FHL5	ENSG00000112214.10	chr1_109279544_G_A_b38	rs599839	0.0015	0.00018	-0.17
FAM129A	ENSG00000135842.16	chr1_109279544_G_A_b38	rs599839	0.0018	0.00015	-0.071
KCNA5	ENSG00000130037.4	chr1_109279544_G_A_b38	rs599839	0.0035	8.9e-05	0.13
A2M	ENSG00000175899.14	chr1_109279544_G_A_b38	rs599839	0.008	Not an eGene	0.12
IGFBP6	ENSG00000167779.7	chr1_109279544_G_A_b38	rs599839	0.01	Not an eGene	-0.12
PEBP1	ENSG00000089220.4	chr1_109279544_G_A_b38	rs599839	0.011	9e-05	-0.1
RBPMS2	ENSG00000166831.8	chr1_109279544_G_A_b38	rs599839	0.024	0.0002	-0.12
SCRG1	ENSG00000164106.7	chr1_109279544_G_A_b38	rs599839	0.024	Not an eGene	0.091
WDR82	ENSG00000164091.11	chr1_109279544_G_A_b38	rs599839	0.025	0.0003	0.063
HIGD1A	ENSG00000181061.13	chr1_109279544_G_A_b38	rs599839	0.026	0.00014	-0.075
ZBTB16	ENSG00000109906.13	chr1_109279544_G_A_b38	rs599839	0.028	Not an eGene	0.07
YIPF6	ENSG00000181704.11	chr1_109279544_G_A_b38	rs599839	0.03	0.00015	-0.074
COX5B	ENSG00000135940.6	chr1_109279544_G_A_b38	rs599839	0.033	Not an eGene	-0.065
PALLD	ENSG00000129116.17	chr1_109279544_G_A_b38	rs599839	0.041	0.00013	-0.052
ADH1B	ENSG00000196616.13	chr1_109279544_G_A_b38	rs599839	0.052	0.00014	-0.083
ATOH8	ENSG00000168874.12	chr1_109279544_G_A_b38	rs599839	0.054	Not an eGene	-0.07
GGNBP2	ENSG00000278311.4	chr1_109279544_G_A_b38	rs599839	0.079	9.5e-05	-0.072
NOV	ENSG00000136999.4	chr1_109279544_G_A_b38	rs599839	0.082	0.00014	-0.056
NUPR1	ENSG00000176046.8	chr1_109279544_G_A_b38	rs599839	0.085	0.00016	-0.095
CLN5	ENSG00000102805.14	chr1_109279544_G_A_b38	rs599839	0.09	Not an eGene	-0.082
TGFBR3	ENSG00000069702.10	chr1_109279544_G_A_b38	rs599839	0.098	Not an eGene	0.074
IL6	ENSG00000136244.11	chr1_109279544_G_A_b38	rs599839	0.099	Not an eGene	-0.078
MYH10	ENSG00000133026.12	chr1_109279544_G_A_b38	rs599839	0.11	7.9e-05	-0.051
RCAN2	ENSG00000172348.14	chr1_109279544_G_A_b38	rs599839	0.11	9.6e-05	-0.051
EFHD1	ENSG00000115468.11	chr1_109279544_G_A_b38	rs599839	0.12	0.0001	0.046
MFAP4	ENSG00000166482.11	chr1_109279544_G_A_b38	rs599839	0.12	Not an eGene	-0.064
NPTX2	ENSG00000106236.3	chr1_109279544_G_A_b38	rs599839	0.12	0.00015	-0.099
RGS5	ENSG00000143248.12	chr1_109279544_G_A_b38	rs599839	0.12	0.0001	-0.054
BBX	ENSG00000114439.18	chr1_109279544_G_A_b38	rs599839	0.14	Not an eGene	-0.043
FAM46B	ENSG00000158246.7	chr1_109279544_G_A_b38	rs599839	0.15	Not an eGene	-0.062
HSPB7	ENSG00000173641.17	chr1_109279544_G_A_b38	rs599839	0.15	0.00011	0.058
FMOD	ENSG00000122176.10	chr1_109279544_G_A_b38	rs599839	0.16	7.7e-05	-0.062
PDLIM3	ENSG00000154553.13	chr1_109279544_G_A_b38	rs599839	0.17	5.4e-05	0.061
PKD2	ENSG00000118762.7	chr1_109279544_G_A_b38	rs599839	0.18	Not an eGene	-0.035
SMOC2	ENSG00000112562.18	chr1_109279544_G_A_b38	rs599839	0.18	7.5e-05	0.061
METTL7A	ENSG00000185432.11	chr1_109279544_G_A_b38	rs599839	0.19	0.00019	-0.036
ITGA10	ENSG00000143127.12	chr1_109279544_G_A_b38	rs599839	0.2	0.0002	0.042
HSPB2	ENSG00000170276.5	chr1_109279544_G_A_b38	rs599839	0.21	0.00014	-0.042
PGRMC2	ENSG00000164040.16	chr1_109279544_G_A_b38	rs599839	0.22	0.00016	-0.057
PPP1R3C	ENSG00000119938.8	chr1_109279544_G_A_b38	rs599839	0.22	0.0002	-0.059
RAMP1	ENSG00000132329.10	chr1_109279544_G_A_b38	rs599839	0.22	9.5e-05	-0.046
CCDC102A	ENSG00000135736.5	chr1_109279544_G_A_b38	rs599839	0.23	8.6e-05	-0.04
CSNK2A2	ENSG00000070770.8	chr1_109279544_G_A_b38	rs599839	0.23	Not an eGene	0.042
CTSZ	ENSG00000101160.13	chr1_109279544_G_A_b38	rs599839	0.23	Not an eGene	0.041
ACTG2	ENSG00000163017.13	chr1_109279544_G_A_b38	rs599839	0.24	Not an eGene	-0.046
FHL1	ENSG00000022267.16	chr1_109279544_G_A_b38	rs599839	0.24	0.00023	0.047
NEXN	ENSG00000162614.18	chr1_109279544_G_A_b38	rs599839	0.25	0.00016	-0.022
PGRMC1	ENSG00000101856.9	chr1_109279544_G_A_b38	rs599839	0.25	0.00015	-0.041
SGCA	ENSG00000108823.15	chr1_109279544_G_A_b38	rs599839	0.27	8.5e-05	0.041
KLF9	ENSG00000119138.4	chr1_109279544_G_A_b38	rs599839	0.28	Not an eGene	0.039
AOC3	ENSG00000131471.6	chr1_109279544_G_A_b38	rs599839	0.29	0.00022	0.048
LIMCH1	ENSG00000064042.17	chr1_109279544_G_A_b38	rs599839	0.29	9e-05	-0.039
MYH11	ENSG00000133392.17	chr1_109279544_G_A_b38	rs599839	0.29	Not an eGene	-0.025
FOSB	ENSG00000125740.13	chr1_109279544_G_A_b38	rs599839	0.3	7.1e-05	-0.058
GLDN	ENSG00000186417.13	chr1_109279544_G_A_b38	rs599839	0.3	0.00019	-0.064
NFIA	ENSG00000162599.15	chr1_109279544_G_A_b38	rs599839	0.31	Not an eGene	0.03
CALD1	ENSG00000122786.19	chr1_109279544_G_A_b38	rs599839	0.32	Not an eGene	-0.029
YAP1	ENSG00000137693.13	chr1_109279544_G_A_b38	rs599839	0.32	Not an eGene	-0.027
ITGA8	ENSG00000077943.7	chr1_109279544_G_A_b38	rs599839	0.33	0.0001	-0.036
DACT3	ENSG00000197380.10	chr1_109279544_G_A_b38	rs599839	0.34	Not an eGene	0.022
RASL12	ENSG00000103710.10	chr1_109279544_G_A_b38	rs599839	0.34	Not an eGene	-0.032
UCP2	ENSG00000175567.8	chr1_109279544_G_A_b38	rs599839	0.34	0.00017	0.037
AKR1C3	ENSG00000196139.13	chr1_109279544_G_A_b38	rs599839	0.35	Not an eGene	0.045
KLHDC2	ENSG00000165516.10	chr1_109279544_G_A_b38	rs599839	0.35	Not an eGene	0.035
SERPINA3	ENSG00000196136.17	chr1_109279544_G_A_b38	rs599839	0.35	6.3e-05	0.035
IL2RB	ENSG00000100385.13	chr1_109279544_G_A_b38	rs599839	0.37	Not an eGene	0.037
PACSIN2	ENSG00000100266.18	chr1_109279544_G_A_b38	rs599839	0.37	0.0001	0.038
SLC25A4	ENSG00000151729.10	chr1_109279544_G_A_b38	rs599839	0.41	5.2e-05	-0.026
TCEAL2	ENSG00000184905.8	chr1_109279544_G_A_b38	rs599839	0.41	Not an eGene	-0.028
MGP	ENSG00000111341.9	chr1_109279544_G_A_b38	rs599839	0.42	0.00014	0.031
NXPH3	ENSG00000182575.7	chr1_109279544_G_A_b38	rs599839	0.42	Not an eGene	0.031
RPL35A	ENSG00000182899.14	chr1_109279544_G_A_b38	rs599839	0.42	Not an eGene	0.017
TC2N	ENSG00000165929.12	chr1_109279544_G_A_b38	rs599839	0.42	9.1e-05	0.029
DDIT4	ENSG00000168209.4	chr1_109279544_G_A_b38	rs599839	0.43	Not an eGene	0.037
DUSP3	ENSG00000108861.8	chr1_109279544_G_A_b38	rs599839	0.44	Not an eGene	-0.03
LMOD1	ENSG00000163431.12	chr1_109279544_G_A_b38	rs599839	0.44	8.8e-05	-0.024
SIK1	ENSG00000142178.7	chr1_109279544_G_A_b38	rs599839	0.46	0.0001	0.064
GFOD1	ENSG00000145990.10	chr1_109279544_G_A_b38	rs599839	0.47	0.00012	-0.031
ADH1A	ENSG00000187758.7	chr1_109279544_G_A_b38	rs599839	0.48	0.00016	-0.046
FOXO1	ENSG00000150907.7	chr1_109279544_G_A_b38	rs599839	0.48	Not an eGene	0.027
RABGAP1	ENSG00000011454.16	chr1_109279544_G_A_b38	rs599839	0.48	0.00012	-0.031
IGFBP2	ENSG00000115457.9	chr1_109279544_G_A_b38	rs599839	0.5	8.3e-05	0.025
NDN	ENSG00000182636.5	chr1_109279544_G_A_b38	rs599839	0.51	7.4e-05	0.039
CHSY3	ENSG00000198108.3	chr1_109279544_G_A_b38	rs599839	0.52	Not an eGene	-0.026
KLF15	ENSG00000163884.3	chr1_109279544_G_A_b38	rs599839	0.52	Not an eGene	0.02
IGFBP3	ENSG00000146674.14	chr1_109279544_G_A_b38	rs599839	0.53	0.00012	0.044
TMEM14A	ENSG00000096092.5	chr1_109279544_G_A_b38	rs599839	0.54	9.6e-05	0.026
PPP1R14A	ENSG00000167641.10	chr1_109279544_G_A_b38	rs599839	0.55	0.00019	0.015
CBX6	ENSG00000183741.11	chr1_109279544_G_A_b38	rs599839	0.56	0.0001	0.019
TIMP4	ENSG00000157150.4	chr1_109279544_G_A_b38	rs599839	0.56	0.00011	0.024
WFS1	ENSG00000109501.13	chr1_109279544_G_A_b38	rs599839	0.56	Not an eGene	0.016
ANKRD46	ENSG00000186106.11	chr1_109279544_G_A_b38	rs599839	0.57	Not an eGene	0.02
CSPG4	ENSG00000173546.7	chr1_109279544_G_A_b38	rs599839	0.57	Not an eGene	-0.018
FERMT2	ENSG00000073712.14	chr1_109279544_G_A_b38	rs599839	0.57	Not an eGene	0.014
THBS2	ENSG00000186340.14	chr1_109279544_G_A_b38	rs599839	0.58	8.2e-05	0.021
C2orf40	ENSG00000119147.9	chr1_109279544_G_A_b38	rs599839	0.59	0.0001	-0.033
CAP2	ENSG00000112186.11	chr1_109279544_G_A_b38	rs599839	0.59	0.00011	-0.017
LMCD1	ENSG00000071282.11	chr1_109279544_G_A_b38	rs599839	0.59	6.1e-05	-0.022
LTB	ENSG00000227507.2	chr1_109279544_G_A_b38	rs599839	0.59	Not an eGene	-0.031
COX7A1	ENSG00000161281.10	chr1_109279544_G_A_b38	rs599839	0.6	0.00012	-0.02
HLA-DQB1	ENSG00000179344.16	chr1_109279544_G_A_b38	rs599839	0.6	0.00015	0.034
HBA2	ENSG00000188536.12	chr1_109279544_G_A_b38	rs599839	0.62	Not an eGene	-0.032
FCN1	ENSG00000085265.10	chr1_109279544_G_A_b38	rs599839	0.64	Not an eGene	0.029
PPP1R12C	ENSG00000125503.12	chr1_109279544_G_A_b38	rs599839	0.64	Not an eGene	0.016
CXXC5	ENSG00000171604.11	chr1_109279544_G_A_b38	rs599839	0.66	0.00023	0.015
DSTN	ENSG00000125868.15	chr1_109279544_G_A_b38	rs599839	0.66	Not an eGene	-0.011
ZNF462	ENSG00000148143.12	chr1_109279544_G_A_b38	rs599839	0.66	Not an eGene	-0.02
FRZB	ENSG00000162998.4	chr1_109279544_G_A_b38	rs599839	0.67	0.00016	-0.018
HBB	ENSG00000244734.3	chr1_109279544_G_A_b38	rs599839	0.67	Not an eGene	-0.028
CNN1	ENSG00000130176.7	chr1_109279544_G_A_b38	rs599839	0.68	Not an eGene	0.01
KCNMB1	ENSG00000145936.8	chr1_109279544_G_A_b38	rs599839	0.68	9.6e-05	0.016
NR2F6	ENSG00000160113.5	chr1_109279544_G_A_b38	rs599839	0.68	6.9e-05	0.017
CSRP2	ENSG00000175183.9	chr1_109279544_G_A_b38	rs599839	0.7	0.00012	-0.016
IL1B	ENSG00000125538.11	chr1_109279544_G_A_b38	rs599839	0.7	Not an eGene	0.022
MT1X	ENSG00000187193.8	chr1_109279544_G_A_b38	rs599839	0.7	8.2e-05	-0.016
TRPC1	ENSG00000144935.14	chr1_109279544_G_A_b38	rs599839	0.7	Not an eGene	0.012
CRYAB	ENSG00000109846.7	chr1_109279544_G_A_b38	rs599839	0.73	Not an eGene	0.013
PHGDH	ENSG00000092621.11	chr1_109279544_G_A_b38	rs599839	0.73	0.00016	0.021
PADI4	ENSG00000159339.13	chr1_109279544_G_A_b38	rs599839	0.78	Not an eGene	-0.021
CPE	ENSG00000109472.13	chr1_109279544_G_A_b38	rs599839	0.79	0.00011	0.011
GPD1L	ENSG00000152642.10	chr1_109279544_G_A_b38	rs599839	0.79	7.8e-05	-0.0091
CCR7	ENSG00000126353.3	chr1_109279544_G_A_b38	rs599839	0.8	0.00015	-0.015
ATP1A2	ENSG00000018625.14	chr1_109279544_G_A_b38	rs599839	0.81	9.4e-05	0.0084
PXDN	ENSG00000130508.10	chr1_109279544_G_A_b38	rs599839	0.82	Not an eGene	0.0097
GBP5	ENSG00000154451.14	chr1_109279544_G_A_b38	rs599839	0.84	Not an eGene	-0.0093
ITK	ENSG00000113263.12	chr1_109279544_G_A_b38	rs599839	0.85	Not an eGene	0.0074
FKBP5	ENSG00000096060.14	chr1_109279544_G_A_b38	rs599839	0.86	Not an eGene	0.0042
JAG1	ENSG00000101384.11	chr1_109279544_G_A_b38	rs599839	0.87	Not an eGene	0.0071
GMDS	ENSG00000112699.10	chr1_109279544_G_A_b38	rs599839	0.88	6.4e-05	0.0068
MT1M	ENSG00000205364.3	chr1_109279544_G_A_b38	rs599839	0.88	7.8e-05	0.0067
SRPX	ENSG00000101955.14	chr1_109279544_G_A_b38	rs599839	0.89	0.00019	-0.0063
CSRP1	ENSG00000159176.13	chr1_109279544_G_A_b38	rs599839	0.9	Not an eGene	0.0041
KLHL9	ENSG00000198642.6	chr1_109279544_G_A_b38	rs599839	0.91	Not an eGene	0.0043
MAOA	ENSG00000189221.9	chr1_109279544_G_A_b38	rs599839	0.91	0.00018	0.0031
LSM2	ENSG00000204392.10	chr1_109279544_G_A_b38	rs599839	0.94	0.00019	-0.0028
SPARC	ENSG00000113140.10	chr1_109279544_G_A_b38	rs599839	0.95	0.00011	-0.003
TMEM47	ENSG00000147027.3	chr1_109279544_G_A_b38	rs599839	0.95	0.00028	-0.002
CYBRD1	ENSG00000071967.11	chr1_109279544_G_A_b38	rs599839	0.96	0.00012	-0.0025
SPARCL1	ENSG00000152583.12	chr1_109279544_G_A_b38	rs599839	0.96	0.00016	-0.002
MMP9	ENSG00000100985.7	chr1_109279544_G_A_b38	rs599839	0.97	Not an eGene	0.0029
AIF1L	ENSG00000126878.12	chr1_109279544_G_A_b38	rs599839	0.98	8.3e-05	0.0025
rs6511720
SGCA	ENSG00000108823.15	chr19_11091630_G_T_b38	rs6511720	0.019	8.5e-05	0.15
KCNA5	ENSG00000130037.4	chr19_11091630_G_T_b38	rs6511720	0.02	8.9e-05	-0.18
RPL35A	ENSG00000182899.14	chr19_11091630_G_T_b38	rs6511720	0.025	Not an eGene	-0.084
RBPMS2	ENSG00000166831.8	chr19_11091630_G_T_b38	rs6511720	0.034	0.0002	-0.2
LTB	ENSG00000227507.2	chr19_11091630_G_T_b38	rs6511720	0.045	Not an eGene	-0.2
SIK1	ENSG00000142178.7	chr19_11091630_G_T_b38	rs6511720	0.049	0.0001	0.29
TCEAL2	ENSG00000184905.8	chr19_11091630_G_T_b38	rs6511720	0.064	Not an eGene	-0.11
NFIA	ENSG00000162599.15	chr19_11091630_G_T_b38	rs6511720	0.066	Not an eGene	0.094
DACT3	ENSG00000197380.10	chr19_11091630_G_T_b38	rs6511720	0.069	Not an eGene	-0.071
HSPB7	ENSG00000173641.17	chr19_11091630_G_T_b38	rs6511720	0.08	0.00011	-0.12
AIF1L	ENSG00000126878.12	chr19_11091630_G_T_b38	rs6511720	0.086	8.3e-05	-0.24
ACTG2	ENSG00000163017.13	chr19_11091630_G_T_b38	rs6511720	0.096	Not an eGene	0.11
NDN	ENSG00000182636.5	chr19_11091630_G_T_b38	rs6511720	0.096	7.4e-05	-0.17
WFS1	ENSG00000109501.13	chr19_11091630_G_T_b38	rs6511720	0.096	Not an eGene	-0.081
FOSB	ENSG00000125740.13	chr19_11091630_G_T_b38	rs6511720	0.098	7.1e-05	0.16
COX5B	ENSG00000135940.6	chr19_11091630_G_T_b38	rs6511720	0.1	Not an eGene	0.086
KLHDC2	ENSG00000165516.10	chr19_11091630_G_T_b38	rs6511720	0.11	Not an eGene	-0.11
IGFBP2	ENSG00000115457.9	chr19_11091630_G_T_b38	rs6511720	0.12	8.3e-05	-0.098
PACSIN2	ENSG00000100266.18	chr19_11091630_G_T_b38	rs6511720	0.12	0.0001	-0.12
THBS2	ENSG00000186340.14	chr19_11091630_G_T_b38	rs6511720	0.12	8.2e-05	-0.1
DUSP3	ENSG00000108861.8	chr19_11091630_G_T_b38	rs6511720	0.13	Not an eGene	-0.1
FCN1	ENSG00000085265.10	chr19_11091630_G_T_b38	rs6511720	0.14	Not an eGene	-0.16
MT1M	ENSG00000205364.3	chr19_11091630_G_T_b38	rs6511720	0.14	7.8e-05	-0.12
PADI4	ENSG00000159339.13	chr19_11091630_G_T_b38	rs6511720	0.14	Not an eGene	-0.19
ATP1A2	ENSG00000018625.14	chr19_11091630_G_T_b38	rs6511720	0.15	9.4e-05	-0.087
GMDS	ENSG00000112699.10	chr19_11091630_G_T_b38	rs6511720	0.15	6.4e-05	0.11
PGRMC1	ENSG00000101856.9	chr19_11091630_G_T_b38	rs6511720	0.16	0.00015	-0.088
IL6	ENSG00000136244.11	chr19_11091630_G_T_b38	rs6511720	0.17	Not an eGene	0.11
SERPINA3	ENSG00000196136.17	chr19_11091630_G_T_b38	rs6511720	0.17	6.3e-05	0.088
SLC25A4	ENSG00000151729.10	chr19_11091630_G_T_b38	rs6511720	0.17	5.2e-05	-0.076
CLN5	ENSG00000102805.14	chr19_11091630_G_T_b38	rs6511720	0.19	Not an eGene	0.11
MAOA	ENSG00000189221.9	chr19_11091630_G_T_b38	rs6511720	0.19	0.00018	0.059
PPP1R12C	ENSG00000125503.12	chr19_11091630_G_T_b38	rs6511720	0.19	Not an eGene	-0.08
ITGA8	ENSG00000077943.7	chr19_11091630_G_T_b38	rs6511720	0.2	0.0001	0.08
ZNF462	ENSG00000148143.12	chr19_11091630_G_T_b38	rs6511720	0.22	Not an eGene	0.096
TIMP4	ENSG00000157150.4	chr19_11091630_G_T_b38	rs6511720	0.24	0.00011	-0.083
NPTX2	ENSG00000106236.3	chr19_11091630_G_T_b38	rs6511720	0.25	0.00015	-0.13
PEBP1	ENSG00000089220.4	chr19_11091630_G_T_b38	rs6511720	0.25	9e-05	-0.081
CYBRD1	ENSG00000071967.11	chr19_11091630_G_T_b38	rs6511720	0.27	0.00012	0.1
HLA-DQB1	ENSG00000179344.16	chr19_11091630_G_T_b38	rs6511720	0.27	0.00015	-0.13
MMP9	ENSG00000100985.7	chr19_11091630_G_T_b38	rs6511720	0.27	Not an eGene	-0.14
NEXN	ENSG00000162614.18	chr19_11091630_G_T_b38	rs6511720	0.27	0.00016	-0.037
FOXO1	ENSG00000150907.7	chr19_11091630_G_T_b38	rs6511720	0.3	Not an eGene	-0.068
RASL12	ENSG00000103710.10	chr19_11091630_G_T_b38	rs6511720	0.3	Not an eGene	-0.061
CCL3	ENSG00000277632.1	chr19_11091630_G_T_b38	rs6511720	0.31	9.2e-05	0.11
RAMP1	ENSG00000132329.10	chr19_11091630_G_T_b38	rs6511720	0.31	9.5e-05	0.065
YAP1	ENSG00000137693.13	chr19_11091630_G_T_b38	rs6511720	0.31	Not an eGene	0.047
ADH1B	ENSG00000196616.13	chr19_11091630_G_T_b38	rs6511720	0.32	0.00014	-0.074
C2orf40	ENSG00000119147.9	chr19_11091630_G_T_b38	rs6511720	0.32	0.0001	-0.11
KLF9	ENSG00000119138.4	chr19_11091630_G_T_b38	rs6511720	0.32	Not an eGene	0.063
FERMT2	ENSG00000073712.14	chr19_11091630_G_T_b38	rs6511720	0.36	Not an eGene	0.038
METTL7A	ENSG00000185432.11	chr19_11091630_G_T_b38	rs6511720	0.36	0.00019	-0.043
FHL5	ENSG00000112214.10	chr19_11091630_G_T_b38	rs6511720	0.37	0.00018	0.085
CTSZ	ENSG00000101160.13	chr19_11091630_G_T_b38	rs6511720	0.38	Not an eGene	-0.052
CBX6	ENSG00000183741.11	chr19_11091630_G_T_b38	rs6511720	0.39	0.0001	0.049
ITGA10	ENSG00000143127.12	chr19_11091630_G_T_b38	rs6511720	0.39	0.0002	-0.049
ITK	ENSG00000113263.12	chr19_11091630_G_T_b38	rs6511720	0.39	Not an eGene	-0.06
TRPC1	ENSG00000144935.14	chr19_11091630_G_T_b38	rs6511720	0.4	Not an eGene	0.047
CAP2	ENSG00000112186.11	chr19_11091630_G_T_b38	rs6511720	0.41	0.00011	-0.044
CCDC102A	ENSG00000135736.5	chr19_11091630_G_T_b38	rs6511720	0.41	8.6e-05	-0.047
IL1B	ENSG00000125538.11	chr19_11091630_G_T_b38	rs6511720	0.42	Not an eGene	0.08
HSPB2	ENSG00000170276.5	chr19_11091630_G_T_b38	rs6511720	0.43	0.00014	0.046
MYH11	ENSG00000133392.17	chr19_11091630_G_T_b38	rs6511720	0.43	Not an eGene	-0.032
BBX	ENSG00000114439.18	chr19_11091630_G_T_b38	rs6511720	0.44	Not an eGene	0.039
NUPR1	ENSG00000176046.8	chr19_11091630_G_T_b38	rs6511720	0.44	0.00016	0.074
RABGAP1	ENSG00000011454.16	chr19_11091630_G_T_b38	rs6511720	0.44	0.00012	0.059
MT1X	ENSG00000187193.8	chr19_11091630_G_T_b38	rs6511720	0.45	8.2e-05	-0.055
NXPH3	ENSG00000182575.7	chr19_11091630_G_T_b38	rs6511720	0.45	Not an eGene	-0.051
CXXC5	ENSG00000171604.11	chr19_11091630_G_T_b38	rs6511720	0.48	0.00023	-0.041
PPP1R3C	ENSG00000119938.8	chr19_11091630_G_T_b38	rs6511720	0.48	0.0002	-0.059
A2M	ENSG00000175899.14	chr19_11091630_G_T_b38	rs6511720	0.49	Not an eGene	-0.055
FMOD	ENSG00000122176.10	chr19_11091630_G_T_b38	rs6511720	0.49	7.7e-05	-0.053
LMCD1	ENSG00000071282.11	chr19_11091630_G_T_b38	rs6511720	0.5	6.1e-05	-0.049
SPARCL1	ENSG00000152583.12	chr19_11091630_G_T_b38	rs6511720	0.5	0.00016	0.05
CCR7	ENSG00000126353.3	chr19_11091630_G_T_b38	rs6511720	0.51	0.00015	0.065
MFAP4	ENSG00000166482.11	chr19_11091630_G_T_b38	rs6511720	0.52	Not an eGene	-0.046
NOV	ENSG00000136999.4	chr19_11091630_G_T_b38	rs6511720	0.52	0.00014	0.036
RGS5	ENSG00000143248.12	chr19_11091630_G_T_b38	rs6511720	0.53	0.0001	0.037
SMOC2	ENSG00000112562.18	chr19_11091630_G_T_b38	rs6511720	0.54	7.5e-05	0.048
GFOD1	ENSG00000145990.10	chr19_11091630_G_T_b38	rs6511720	0.55	0.00012	0.044
KLHL9	ENSG00000198642.6	chr19_11091630_G_T_b38	rs6511720	0.56	Not an eGene	0.037
WDR82	ENSG00000164091.11	chr19_11091630_G_T_b38	rs6511720	0.56	0.0003	-0.029
FAM46B	ENSG00000158246.7	chr19_11091630_G_T_b38	rs6511720	0.57	Not an eGene	-0.042
LMOD1	ENSG00000163431.12	chr19_11091630_G_T_b38	rs6511720	0.57	8.8e-05	0.03
PXDN	ENSG00000130508.10	chr19_11091630_G_T_b38	rs6511720	0.57	Not an eGene	-0.041
NR2F6	ENSG00000160113.5	chr19_11091630_G_T_b38	rs6511720	0.59	6.9e-05	-0.038
TGFBR3	ENSG00000069702.10	chr19_11091630_G_T_b38	rs6511720	0.59	Not an eGene	0.042
CALD1	ENSG00000122786.19	chr19_11091630_G_T_b38	rs6511720	0.61	Not an eGene	0.026
PHGDH	ENSG00000092621.11	chr19_11091630_G_T_b38	rs6511720	0.61	0.00016	-0.054
FKBP5	ENSG00000096060.14	chr19_11091630_G_T_b38	rs6511720	0.63	Not an eGene	0.021
ANKRD46	ENSG00000186106.11	chr19_11091630_G_T_b38	rs6511720	0.65	Not an eGene	-0.028
CNN1	ENSG00000130176.7	chr19_11091630_G_T_b38	rs6511720	0.65	Not an eGene	0.019
HBB	ENSG00000244734.3	chr19_11091630_G_T_b38	rs6511720	0.66	Not an eGene	0.051
RCAN2	ENSG00000172348.14	chr19_11091630_G_T_b38	rs6511720	0.66	9.6e-05	0.025
GLDN	ENSG00000186417.13	chr19_11091630_G_T_b38	rs6511720	0.67	0.00019	0.046
TC2N	ENSG00000165929.12	chr19_11091630_G_T_b38	rs6511720	0.7	9.1e-05	-0.024
CSPG4	ENSG00000173546.7	chr19_11091630_G_T_b38	rs6511720	0.72	Not an eGene	0.02
DSTN	ENSG00000125868.15	chr19_11091630_G_T_b38	rs6511720	0.74	Not an eGene	-0.015
ATOH8	ENSG00000168874.12	chr19_11091630_G_T_b38	rs6511720	0.75	Not an eGene	0.02
AOC3	ENSG00000131471.6	chr19_11091630_G_T_b38	rs6511720	0.77	0.00022	0.023
CSRP1	ENSG00000159176.13	chr19_11091630_G_T_b38	rs6511720	0.77	Not an eGene	-0.017
CHSY3	ENSG00000198108.3	chr19_11091630_G_T_b38	rs6511720	0.78	Not an eGene	0.019
CSNK2A2	ENSG00000070770.8	chr19_11091630_G_T_b38	rs6511720	0.8	Not an eGene	0.016
DDIT4	ENSG00000168209.4	chr19_11091630_G_T_b38	rs6511720	0.8	Not an eGene	-0.021
SCRG1	ENSG00000164106.7	chr19_11091630_G_T_b38	rs6511720	0.8	Not an eGene	0.018
SRPX	ENSG00000101955.14	chr19_11091630_G_T_b38	rs6511720	0.8	0.00019	0.021
AKR1C3	ENSG00000196139.13	chr19_11091630_G_T_b38	rs6511720	0.81	Not an eGene	0.02
CPE	ENSG00000109472.13	chr19_11091630_G_T_b38	rs6511720	0.81	0.00011	-0.017
FHL1	ENSG00000022267.16	chr19_11091630_G_T_b38	rs6511720	0.81	0.00023	0.017
PDLIM3	ENSG00000154553.13	chr19_11091630_G_T_b38	rs6511720	0.81	5.4e-05	0.019
SPARC	ENSG00000113140.10	chr19_11091630_G_T_b38	rs6511720	0.81	0.00011	-0.021
FRZB	ENSG00000162998.4	chr19_11091630_G_T_b38	rs6511720	0.82	0.00016	-0.017
LIMCH1	ENSG00000064042.17	chr19_11091630_G_T_b38	rs6511720	0.82	9e-05	-0.015
FAM129A	ENSG00000135842.16	chr19_11091630_G_T_b38	rs6511720	0.83	0.00015	0.0085
JAG1	ENSG00000101384.11	chr19_11091630_G_T_b38	rs6511720	0.83	Not an eGene	-0.016
GGNBP2	ENSG00000278311.4	chr19_11091630_G_T_b38	rs6511720	0.84	9.5e-05	0.015
IGFBP6	ENSG00000167779.7	chr19_11091630_G_T_b38	rs6511720	0.84	Not an eGene	-0.016
PALLD	ENSG00000129116.17	chr19_11091630_G_T_b38	rs6511720	0.84	0.00013	0.0089
EFHD1	ENSG00000115468.11	chr19_11091630_G_T_b38	rs6511720	0.86	0.0001	-0.0092
GBP5	ENSG00000154451.14	chr19_11091630_G_T_b38	rs6511720	0.87	Not an eGene	-0.013
PKD2	ENSG00000118762.7	chr19_11091630_G_T_b38	rs6511720	0.87	Not an eGene	-0.0071
HIGD1A	ENSG00000181061.13	chr19_11091630_G_T_b38	rs6511720	0.88	0.00014	-0.0091
TMEM47	ENSG00000147027.3	chr19_11091630_G_T_b38	rs6511720	0.89	0.00028	0.0072
HBA2	ENSG00000188536.12	chr19_11091630_G_T_b38	rs6511720	0.9	Not an eGene	0.015
GPD1L	ENSG00000152642.10	chr19_11091630_G_T_b38	rs6511720	0.91	7.8e-05	-0.007
KLF15	ENSG00000163884.3	chr19_11091630_G_T_b38	rs6511720	0.91	Not an eGene	-0.0057
YIPF6	ENSG00000181704.11	chr19_11091630_G_T_b38	rs6511720	0.92	0.00015	0.0063
ADH1A	ENSG00000187758.7	chr19_11091630_G_T_b38	rs6511720	0.93	0.00016	-0.011
COX7A1	ENSG00000161281.10	chr19_11091630_G_T_b38	rs6511720	0.93	0.00012	-0.006
ZBTB16	ENSG00000109906.13	chr19_11091630_G_T_b38	rs6511720	0.93	Not an eGene	-0.0049
TMEM14A	ENSG00000096092.5	chr19_11091630_G_T_b38	rs6511720	0.94	9.6e-05	0.0054
IGFBP3	ENSG00000146674.14	chr19_11091630_G_T_b38	rs6511720	0.95	0.00012	-0.0076
PPP1R14A	ENSG00000167641.10	chr19_11091630_G_T_b38	rs6511720	0.95	0.00019	-0.0025
PGRMC2	ENSG00000164040.16	chr19_11091630_G_T_b38	rs6511720	0.96	0.00016	-0.0037
CRYAB	ENSG00000109846.7	chr19_11091630_G_T_b38	rs6511720	0.97	Not an eGene	0.0024
LSM2	ENSG00000204392.10	chr19_11091630_G_T_b38	rs6511720	0.97	0.00019	-0.0028
UCP2	ENSG00000175567.8	chr19_11091630_G_T_b38	rs6511720	0.97	0.00017	-0.0024
CSRP2	ENSG00000175183.9	chr19_11091630_G_T_b38	rs6511720	0.98	0.00012	0.0019
KCNMB1	ENSG00000145936.8	chr19_11091630_G_T_b38	rs6511720	0.98	9.6e-05	-0.0018
MGP	ENSG00000111341.9	chr19_11091630_G_T_b38	rs6511720	0.98	0.00014	-0.0018
IL2RB	ENSG00000100385.13	chr19_11091630_G_T_b38	rs6511720	1	Not an eGene	0.00032
MYH10	ENSG00000133026.12	chr19_11091630_G_T_b38	rs6511720	1	7.9e-05	-0.0003
rs602633
KCNA5	ENSG00000130037.4	chr1_109278889_T_G_b38	rs602633	0.002	8.9e-05	0.13
FHL5	ENSG00000112214.10	chr1_109278889_T_G_b38	rs602633	0.0029	0.00018	-0.16
CCL3	ENSG00000277632.1	chr1_109278889_T_G_b38	rs602633	0.0031	9.2e-05	0.19
FAM129A	ENSG00000135842.16	chr1_109278889_T_G_b38	rs602633	0.0051	0.00015	-0.064
PEBP1	ENSG00000089220.4	chr1_109278889_T_G_b38	rs602633	0.0096	9e-05	-0.1
A2M	ENSG00000175899.14	chr1_109278889_T_G_b38	rs602633	0.012	Not an eGene	0.12
IGFBP6	ENSG00000167779.7	chr1_109278889_T_G_b38	rs602633	0.019	Not an eGene	-0.11
YIPF6	ENSG00000181704.11	chr1_109278889_T_G_b38	rs602633	0.02	0.00015	-0.079
MFAP4	ENSG00000166482.11	chr1_109278889_T_G_b38	rs602633	0.023	Not an eGene	-0.093
RBPMS2	ENSG00000166831.8	chr1_109278889_T_G_b38	rs602633	0.024	0.0002	-0.12
COX5B	ENSG00000135940.6	chr1_109278889_T_G_b38	rs602633	0.025	Not an eGene	-0.068
WDR82	ENSG00000164091.11	chr1_109278889_T_G_b38	rs602633	0.027	0.0003	0.063
ZBTB16	ENSG00000109906.13	chr1_109278889_T_G_b38	rs602633	0.038	Not an eGene	0.066
HIGD1A	ENSG00000181061.13	chr1_109278889_T_G_b38	rs602633	0.039	0.00014	-0.07
TGFBR3	ENSG00000069702.10	chr1_109278889_T_G_b38	rs602633	0.04	Not an eGene	0.092
ATOH8	ENSG00000168874.12	chr1_109278889_T_G_b38	rs602633	0.045	Not an eGene	-0.073
SCRG1	ENSG00000164106.7	chr1_109278889_T_G_b38	rs602633	0.057	Not an eGene	0.077
EFHD1	ENSG00000115468.11	chr1_109278889_T_G_b38	rs602633	0.059	0.0001	0.056
RGS5	ENSG00000143248.12	chr1_109278889_T_G_b38	rs602633	0.062	0.0001	-0.064
PDLIM3	ENSG00000154553.13	chr1_109278889_T_G_b38	rs602633	0.064	5.4e-05	0.083
HSPB2	ENSG00000170276.5	chr1_109278889_T_G_b38	rs602633	0.067	0.00014	-0.062
HSPB7	ENSG00000173641.17	chr1_109278889_T_G_b38	rs602633	0.069	0.00011	0.073
NUPR1	ENSG00000176046.8	chr1_109278889_T_G_b38	rs602633	0.072	0.00016	-0.1
ADH1B	ENSG00000196616.13	chr1_109278889_T_G_b38	rs602633	0.083	0.00014	-0.074
NOV	ENSG00000136999.4	chr1_109278889_T_G_b38	rs602633	0.083	0.00014	-0.055
NPTX2	ENSG00000106236.3	chr1_109278889_T_G_b38	rs602633	0.083	0.00015	-0.11
PALLD	ENSG00000129116.17	chr1_109278889_T_G_b38	rs602633	0.087	0.00013	-0.044
DDIT4	ENSG00000168209.4	chr1_109278889_T_G_b38	rs602633	0.1	Not an eGene	0.078
IL6	ENSG00000136244.11	chr1_109278889_T_G_b38	rs602633	0.1	Not an eGene	-0.077
BBX	ENSG00000114439.18	chr1_109278889_T_G_b38	rs602633	0.11	Not an eGene	-0.047
RCAN2	ENSG00000172348.14	chr1_109278889_T_G_b38	rs602633	0.11	9.6e-05	-0.052
GGNBP2	ENSG00000278311.4	chr1_109278889_T_G_b38	rs602633	0.12	9.5e-05	-0.064
SMOC2	ENSG00000112562.18	chr1_109278889_T_G_b38	rs602633	0.12	7.5e-05	0.071
PKD2	ENSG00000118762.7	chr1_109278889_T_G_b38	rs602633	0.13	Not an eGene	-0.038
CLN5	ENSG00000102805.14	chr1_109278889_T_G_b38	rs602633	0.15	Not an eGene	-0.069
CCDC102A	ENSG00000135736.5	chr1_109278889_T_G_b38	rs602633	0.17	8.6e-05	-0.045
FAM46B	ENSG00000158246.7	chr1_109278889_T_G_b38	rs602633	0.17	Not an eGene	-0.059
CTSZ	ENSG00000101160.13	chr1_109278889_T_G_b38	rs602633	0.18	Not an eGene	0.045
KLF9	ENSG00000119138.4	chr1_109278889_T_G_b38	rs602633	0.18	Not an eGene	0.048
FMOD	ENSG00000122176.10	chr1_109278889_T_G_b38	rs602633	0.19	7.7e-05	-0.058
FOSB	ENSG00000125740.13	chr1_109278889_T_G_b38	rs602633	0.19	7.1e-05	-0.074
ITGA10	ENSG00000143127.12	chr1_109278889_T_G_b38	rs602633	0.19	0.0002	0.043
NFIA	ENSG00000162599.15	chr1_109278889_T_G_b38	rs602633	0.22	Not an eGene	0.036
SGCA	ENSG00000108823.15	chr1_109278889_T_G_b38	rs602633	0.22	8.5e-05	0.046
METTL7A	ENSG00000185432.11	chr1_109278889_T_G_b38	rs602633	0.23	0.00019	-0.033
PGRMC1	ENSG00000101856.9	chr1_109278889_T_G_b38	rs602633	0.24	0.00015	-0.042
RASL12	ENSG00000103710.10	chr1_109278889_T_G_b38	rs602633	0.24	Not an eGene	-0.04
DACT3	ENSG00000197380.10	chr1_109278889_T_G_b38	rs602633	0.25	Not an eGene	0.026
ACTG2	ENSG00000163017.13	chr1_109278889_T_G_b38	rs602633	0.26	Not an eGene	-0.044
MGP	ENSG00000111341.9	chr1_109278889_T_G_b38	rs602633	0.28	0.00014	0.042
NXPH3	ENSG00000182575.7	chr1_109278889_T_G_b38	rs602633	0.28	Not an eGene	0.041
RPL35A	ENSG00000182899.14	chr1_109278889_T_G_b38	rs602633	0.31	Not an eGene	0.022
IGFBP2	ENSG00000115457.9	chr1_109278889_T_G_b38	rs602633	0.32	8.3e-05	0.036
FHL1	ENSG00000022267.16	chr1_109278889_T_G_b38	rs602633	0.33	0.00023	0.038
LIMCH1	ENSG00000064042.17	chr1_109278889_T_G_b38	rs602633	0.33	9e-05	-0.036
NEXN	ENSG00000162614.18	chr1_109278889_T_G_b38	rs602633	0.33	0.00016	-0.019
RAMP1	ENSG00000132329.10	chr1_109278889_T_G_b38	rs602633	0.33	9.5e-05	-0.036
YAP1	ENSG00000137693.13	chr1_109278889_T_G_b38	rs602633	0.33	Not an eGene	-0.026
ITGA8	ENSG00000077943.7	chr1_109278889_T_G_b38	rs602633	0.34	0.0001	-0.035
KLF15	ENSG00000163884.3	chr1_109278889_T_G_b38	rs602633	0.34	Not an eGene	0.029
PGRMC2	ENSG00000164040.16	chr1_109278889_T_G_b38	rs602633	0.34	0.00016	-0.045
MYH10	ENSG00000133026.12	chr1_109278889_T_G_b38	rs602633	0.35	7.9e-05	-0.03
PACSIN2	ENSG00000100266.18	chr1_109278889_T_G_b38	rs602633	0.35	0.0001	0.039
CSNK2A2	ENSG00000070770.8	chr1_109278889_T_G_b38	rs602633	0.36	Not an eGene	0.032
SERPINA3	ENSG00000196136.17	chr1_109278889_T_G_b38	rs602633	0.36	6.3e-05	0.034
TC2N	ENSG00000165929.12	chr1_109278889_T_G_b38	rs602633	0.37	9.1e-05	0.033
CBX6	ENSG00000183741.11	chr1_109278889_T_G_b38	rs602633	0.39	0.0001	0.028
GLDN	ENSG00000186417.13	chr1_109278889_T_G_b38	rs602633	0.39	0.00019	-0.054
PPP1R12C	ENSG00000125503.12	chr1_109278889_T_G_b38	rs602633	0.39	Not an eGene	0.03
PPP1R3C	ENSG00000119938.8	chr1_109278889_T_G_b38	rs602633	0.39	0.0002	-0.041
CALD1	ENSG00000122786.19	chr1_109278889_T_G_b38	rs602633	0.4	Not an eGene	-0.024
MYH11	ENSG00000133392.17	chr1_109278889_T_G_b38	rs602633	0.4	Not an eGene	-0.02
SIK1	ENSG00000142178.7	chr1_109278889_T_G_b38	rs602633	0.4	0.0001	0.072
TMEM14A	ENSG00000096092.5	chr1_109278889_T_G_b38	rs602633	0.4	9.6e-05	0.035
AOC3	ENSG00000131471.6	chr1_109278889_T_G_b38	rs602633	0.41	0.00022	0.037
FOXO1	ENSG00000150907.7	chr1_109278889_T_G_b38	rs602633	0.41	Not an eGene	0.032
IL2RB	ENSG00000100385.13	chr1_109278889_T_G_b38	rs602633	0.41	Not an eGene	0.034
RABGAP1	ENSG00000011454.16	chr1_109278889_T_G_b38	rs602633	0.41	0.00012	-0.036
WFS1	ENSG00000109501.13	chr1_109278889_T_G_b38	rs602633	0.43	Not an eGene	0.022
CSPG4	ENSG00000173546.7	chr1_109278889_T_G_b38	rs602633	0.47	Not an eGene	-0.023
HBA2	ENSG00000188536.12	chr1_109278889_T_G_b38	rs602633	0.47	Not an eGene	-0.047
KLHDC2	ENSG00000165516.10	chr1_109278889_T_G_b38	rs602633	0.47	Not an eGene	0.027
TIMP4	ENSG00000157150.4	chr1_109278889_T_G_b38	rs602633	0.47	0.00011	0.03
CHSY3	ENSG00000198108.3	chr1_109278889_T_G_b38	rs602633	0.48	Not an eGene	-0.029
AKR1C3	ENSG00000196139.13	chr1_109278889_T_G_b38	rs602633	0.49	Not an eGene	0.033
GFOD1	ENSG00000145990.10	chr1_109278889_T_G_b38	rs602633	0.5	0.00012	-0.029
SLC25A4	ENSG00000151729.10	chr1_109278889_T_G_b38	rs602633	0.5	5.2e-05	-0.022
DUSP3	ENSG00000108861.8	chr1_109278889_T_G_b38	rs602633	0.53	Not an eGene	-0.024
ADH1A	ENSG00000187758.7	chr1_109278889_T_G_b38	rs602633	0.54	0.00016	-0.041
NDN	ENSG00000182636.5	chr1_109278889_T_G_b38	rs602633	0.55	7.4e-05	0.035
TCEAL2	ENSG00000184905.8	chr1_109278889_T_G_b38	rs602633	0.55	Not an eGene	-0.02
ITK	ENSG00000113263.12	chr1_109278889_T_G_b38	rs602633	0.56	Not an eGene	0.024
UCP2	ENSG00000175567.8	chr1_109278889_T_G_b38	rs602633	0.56	0.00017	0.023
FERMT2	ENSG00000073712.14	chr1_109278889_T_G_b38	rs602633	0.57	Not an eGene	0.013
HBB	ENSG00000244734.3	chr1_109278889_T_G_b38	rs602633	0.57	Not an eGene	-0.038
PPP1R14A	ENSG00000167641.10	chr1_109278889_T_G_b38	rs602633	0.57	0.00019	0.014
HLA-DQB1	ENSG00000179344.16	chr1_109278889_T_G_b38	rs602633	0.58	0.00015	0.037
MT1M	ENSG00000205364.3	chr1_109278889_T_G_b38	rs602633	0.58	7.8e-05	0.025
KCNMB1	ENSG00000145936.8	chr1_109278889_T_G_b38	rs602633	0.59	9.6e-05	0.021
C2orf40	ENSG00000119147.9	chr1_109278889_T_G_b38	rs602633	0.6	0.0001	-0.032
DSTN	ENSG00000125868.15	chr1_109278889_T_G_b38	rs602633	0.6	Not an eGene	-0.014
MAOA	ENSG00000189221.9	chr1_109278889_T_G_b38	rs602633	0.62	0.00018	0.013
NR2F6	ENSG00000160113.5	chr1_109278889_T_G_b38	rs602633	0.62	6.9e-05	0.02
LMCD1	ENSG00000071282.11	chr1_109278889_T_G_b38	rs602633	0.64	6.1e-05	-0.019
LTB	ENSG00000227507.2	chr1_109278889_T_G_b38	rs602633	0.64	Not an eGene	-0.027
CAP2	ENSG00000112186.11	chr1_109278889_T_G_b38	rs602633	0.65	0.00011	-0.014
ANKRD46	ENSG00000186106.11	chr1_109278889_T_G_b38	rs602633	0.68	Not an eGene	0.015
COX7A1	ENSG00000161281.10	chr1_109278889_T_G_b38	rs602633	0.7	0.00012	-0.014
FCN1	ENSG00000085265.10	chr1_109278889_T_G_b38	rs602633	0.7	Not an eGene	0.024
IL1B	ENSG00000125538.11	chr1_109278889_T_G_b38	rs602633	0.7	Not an eGene	0.022
FRZB	ENSG00000162998.4	chr1_109278889_T_G_b38	rs602633	0.71	0.00016	-0.016
LMOD1	ENSG00000163431.12	chr1_109278889_T_G_b38	rs602633	0.71	8.8e-05	-0.011
ZNF462	ENSG00000148143.12	chr1_109278889_T_G_b38	rs602633	0.72	Not an eGene	-0.016
ATP1A2	ENSG00000018625.14	chr1_109278889_T_G_b38	rs602633	0.73	9.4e-05	0.012
CSRP2	ENSG00000175183.9	chr1_109278889_T_G_b38	rs602633	0.73	0.00012	-0.014
CNN1	ENSG00000130176.7	chr1_109278889_T_G_b38	rs602633	0.76	Not an eGene	0.0073
CXXC5	ENSG00000171604.11	chr1_109278889_T_G_b38	rs602633	0.76	0.00023	0.01
FKBP5	ENSG00000096060.14	chr1_109278889_T_G_b38	rs602633	0.77	Not an eGene	0.0071
LSM2	ENSG00000204392.10	chr1_109278889_T_G_b38	rs602633	0.79	0.00019	0.01
AIF1L	ENSG00000126878.12	chr1_109278889_T_G_b38	rs602633	0.82	8.3e-05	0.018
TRPC1	ENSG00000144935.14	chr1_109278889_T_G_b38	rs602633	0.83	Not an eGene	0.0069
IGFBP3	ENSG00000146674.14	chr1_109278889_T_G_b38	rs602633	0.84	0.00012	0.014
SPARCL1	ENSG00000152583.12	chr1_109278889_T_G_b38	rs602633	0.84	0.00016	-0.0084
CCR7	ENSG00000126353.3	chr1_109278889_T_G_b38	rs602633	0.85	0.00015	-0.011
CSRP1	ENSG00000159176.13	chr1_109278889_T_G_b38	rs602633	0.85	Not an eGene	0.0062
CRYAB	ENSG00000109846.7	chr1_109278889_T_G_b38	rs602633	0.86	Not an eGene	-0.0064
PXDN	ENSG00000130508.10	chr1_109278889_T_G_b38	rs602633	0.86	Not an eGene	0.0076
PHGDH	ENSG00000092621.11	chr1_109278889_T_G_b38	rs602633	0.87	0.00016	0.01
CYBRD1	ENSG00000071967.11	chr1_109278889_T_G_b38	rs602633	0.88	0.00012	-0.0084
GMDS	ENSG00000112699.10	chr1_109278889_T_G_b38	rs602633	0.88	6.4e-05	0.0066
MT1X	ENSG00000187193.8	chr1_109278889_T_G_b38	rs602633	0.88	8.2e-05	-0.0065
GBP5	ENSG00000154451.14	chr1_109278889_T_G_b38	rs602633	0.9	Not an eGene	-0.0058
PADI4	ENSG00000159339.13	chr1_109278889_T_G_b38	rs602633	0.9	Not an eGene	-0.0096
THBS2	ENSG00000186340.14	chr1_109278889_T_G_b38	rs602633	0.91	8.2e-05	0.0041
SPARC	ENSG00000113140.10	chr1_109278889_T_G_b38	rs602633	0.92	0.00011	0.0047
JAG1	ENSG00000101384.11	chr1_109278889_T_G_b38	rs602633	0.93	Not an eGene	0.0036
CPE	ENSG00000109472.13	chr1_109278889_T_G_b38	rs602633	0.95	0.00011	0.0027
KLHL9	ENSG00000198642.6	chr1_109278889_T_G_b38	rs602633	0.96	Not an eGene	0.0021
TMEM47	ENSG00000147027.3	chr1_109278889_T_G_b38	rs602633	0.96	0.00028	-0.0015
GPD1L	ENSG00000152642.10	chr1_109278889_T_G_b38	rs602633	0.98	7.8e-05	0.00081
SRPX	ENSG00000101955.14	chr1_109278889_T_G_b38	rs602633	0.98	0.00019	-0.0014
MMP9	ENSG00000100985.7	chr1_109278889_T_G_b38	rs602633	1	Not an eGene	-0.00026
rs4129267
IGFBP3	ENSG00000146674.14	chr1_154453788_C_T_b38	rs4129267	0.0023	0.00012	-0.17
PGRMC2	ENSG00000164040.16	chr1_154453788_C_T_b38	rs4129267	0.0059	0.00016	0.1
CXXC5	ENSG00000171604.11	chr1_154453788_C_T_b38	rs4129267	0.008	0.00023	0.07
SPARCL1	ENSG00000152583.12	chr1_154453788_C_T_b38	rs4129267	0.016	0.00016	-0.08
AIF1L	ENSG00000126878.12	chr1_154453788_C_T_b38	rs4129267	0.059	8.3e-05	-0.12
RAMP1	ENSG00000132329.10	chr1_154453788_C_T_b38	rs4129267	0.066	9.5e-05	0.054
NFIA	ENSG00000162599.15	chr1_154453788_C_T_b38	rs4129267	0.075	Not an eGene	0.042
AOC3	ENSG00000131471.6	chr1_154453788_C_T_b38	rs4129267	0.1	0.00022	-0.058
PKD2	ENSG00000118762.7	chr1_154453788_C_T_b38	rs4129267	0.11	Not an eGene	-0.032
CAP2	ENSG00000112186.11	chr1_154453788_C_T_b38	rs4129267	0.12	0.00011	0.038
CRYAB	ENSG00000109846.7	chr1_154453788_C_T_b38	rs4129267	0.12	Not an eGene	-0.046
KLF15	ENSG00000163884.3	chr1_154453788_C_T_b38	rs4129267	0.14	Not an eGene	0.035
SPARC	ENSG00000113140.10	chr1_154453788_C_T_b38	rs4129267	0.14	0.00011	0.059
COX7A1	ENSG00000161281.10	chr1_154453788_C_T_b38	rs4129267	0.15	0.00012	0.043
CTSZ	ENSG00000101160.13	chr1_154453788_C_T_b38	rs4129267	0.15	Not an eGene	-0.039
HLA-DQB1	ENSG00000179344.16	chr1_154453788_C_T_b38	rs4129267	0.15	0.00015	-0.076
ITK	ENSG00000113263.12	chr1_154453788_C_T_b38	rs4129267	0.15	Not an eGene	0.046
PEBP1	ENSG00000089220.4	chr1_154453788_C_T_b38	rs4129267	0.17	9e-05	0.045
LMOD1	ENSG00000163431.12	chr1_154453788_C_T_b38	rs4129267	0.18	8.8e-05	0.033
DACT3	ENSG00000197380.10	chr1_154453788_C_T_b38	rs4129267	0.19	Not an eGene	-0.024
KCNA5	ENSG00000130037.4	chr1_154453788_C_T_b38	rs4129267	0.19	8.9e-05	-0.046
KCNMB1	ENSG00000145936.8	chr1_154453788_C_T_b38	rs4129267	0.19	9.6e-05	-0.041
MAOA	ENSG00000189221.9	chr1_154453788_C_T_b38	rs4129267	0.19	0.00018	0.027
PACSIN2	ENSG00000100266.18	chr1_154453788_C_T_b38	rs4129267	0.19	0.0001	0.044
UCP2	ENSG00000175567.8	chr1_154453788_C_T_b38	rs4129267	0.19	0.00017	-0.04
ITGA10	ENSG00000143127.12	chr1_154453788_C_T_b38	rs4129267	0.2	0.0002	0.034
MYH10	ENSG00000133026.12	chr1_154453788_C_T_b38	rs4129267	0.2	7.9e-05	0.033
PPP1R3C	ENSG00000119938.8	chr1_154453788_C_T_b38	rs4129267	0.2	0.0002	-0.048
SCRG1	ENSG00000164106.7	chr1_154453788_C_T_b38	rs4129267	0.2	Not an eGene	-0.041
GBP5	ENSG00000154451.14	chr1_154453788_C_T_b38	rs4129267	0.21	Not an eGene	0.046
CPE	ENSG00000109472.13	chr1_154453788_C_T_b38	rs4129267	0.22	0.00011	-0.04
FOSB	ENSG00000125740.13	chr1_154453788_C_T_b38	rs4129267	0.22	7.1e-05	-0.055
LMCD1	ENSG00000071282.11	chr1_154453788_C_T_b38	rs4129267	0.22	6.1e-05	0.041
LSM2	ENSG00000204392.10	chr1_154453788_C_T_b38	rs4129267	0.22	0.00019	-0.038
PDLIM3	ENSG00000154553.13	chr1_154453788_C_T_b38	rs4129267	0.22	5.4e-05	-0.043
IL1B	ENSG00000125538.11	chr1_154453788_C_T_b38	rs4129267	0.24	Not an eGene	-0.053
GGNBP2	ENSG00000278311.4	chr1_154453788_C_T_b38	rs4129267	0.25	9.5e-05	0.038
GLDN	ENSG00000186417.13	chr1_154453788_C_T_b38	rs4129267	0.25	0.00019	0.057
RPL35A	ENSG00000182899.14	chr1_154453788_C_T_b38	rs4129267	0.25	Not an eGene	0.02
CLN5	ENSG00000102805.14	chr1_154453788_C_T_b38	rs4129267	0.26	Not an eGene	0.043
FHL5	ENSG00000112214.10	chr1_154453788_C_T_b38	rs4129267	0.26	0.00018	0.049
MFAP4	ENSG00000166482.11	chr1_154453788_C_T_b38	rs4129267	0.26	Not an eGene	-0.037
TMEM14A	ENSG00000096092.5	chr1_154453788_C_T_b38	rs4129267	0.27	9.6e-05	0.037
HSPB2	ENSG00000170276.5	chr1_154453788_C_T_b38	rs4129267	0.28	0.00014	0.029
CNN1	ENSG00000130176.7	chr1_154453788_C_T_b38	rs4129267	0.29	Not an eGene	-0.021
FHL1	ENSG00000022267.16	chr1_154453788_C_T_b38	rs4129267	0.29	0.00023	-0.033
PALLD	ENSG00000129116.17	chr1_154453788_C_T_b38	rs4129267	0.32	0.00013	0.02
YAP1	ENSG00000137693.13	chr1_154453788_C_T_b38	rs4129267	0.33	Not an eGene	0.021
FMOD	ENSG00000122176.10	chr1_154453788_C_T_b38	rs4129267	0.34	7.7e-05	-0.033
HBB	ENSG00000244734.3	chr1_154453788_C_T_b38	rs4129267	0.34	Not an eGene	-0.052
CBX6	ENSG00000183741.11	chr1_154453788_C_T_b38	rs4129267	0.35	0.0001	0.024
PXDN	ENSG00000130508.10	chr1_154453788_C_T_b38	rs4129267	0.35	Not an eGene	0.031
NPTX2	ENSG00000106236.3	chr1_154453788_C_T_b38	rs4129267	0.37	0.00015	0.046
RBPMS2	ENSG00000166831.8	chr1_154453788_C_T_b38	rs4129267	0.37	0.0002	-0.039
SGCA	ENSG00000108823.15	chr1_154453788_C_T_b38	rs4129267	0.37	8.5e-05	-0.027
CCR7	ENSG00000126353.3	chr1_154453788_C_T_b38	rs4129267	0.38	0.00015	0.039
IGFBP6	ENSG00000167779.7	chr1_154453788_C_T_b38	rs4129267	0.38	Not an eGene	-0.033
HIGD1A	ENSG00000181061.13	chr1_154453788_C_T_b38	rs4129267	0.39	0.00014	-0.023
MYH11	ENSG00000133392.17	chr1_154453788_C_T_b38	rs4129267	0.39	Not an eGene	-0.016
ADH1A	ENSG00000187758.7	chr1_154453788_C_T_b38	rs4129267	0.42	0.00016	0.042
IL2RB	ENSG00000100385.13	chr1_154453788_C_T_b38	rs4129267	0.42	Not an eGene	-0.027
CYBRD1	ENSG00000071967.11	chr1_154453788_C_T_b38	rs4129267	0.43	0.00012	0.034
HBA2	ENSG00000188536.12	chr1_154453788_C_T_b38	rs4129267	0.43	Not an eGene	-0.041
NDN	ENSG00000182636.5	chr1_154453788_C_T_b38	rs4129267	0.43	7.4e-05	0.037
NXPH3	ENSG00000182575.7	chr1_154453788_C_T_b38	rs4129267	0.43	Not an eGene	-0.024
RASL12	ENSG00000103710.10	chr1_154453788_C_T_b38	rs4129267	0.43	Not an eGene	-0.021
COX5B	ENSG00000135940.6	chr1_154453788_C_T_b38	rs4129267	0.44	Not an eGene	0.019
THBS2	ENSG00000186340.14	chr1_154453788_C_T_b38	rs4129267	0.45	8.2e-05	0.023
DDIT4	ENSG00000168209.4	chr1_154453788_C_T_b38	rs4129267	0.46	Not an eGene	0.028
CSPG4	ENSG00000173546.7	chr1_154453788_C_T_b38	rs4129267	0.51	Not an eGene	-0.017
NOV	ENSG00000136999.4	chr1_154453788_C_T_b38	rs4129267	0.51	0.00014	-0.017
ANKRD46	ENSG00000186106.11	chr1_154453788_C_T_b38	rs4129267	0.52	Not an eGene	-0.018
CCL3	ENSG00000277632.1	chr1_154453788_C_T_b38	rs4129267	0.55	9.2e-05	0.031
KLF9	ENSG00000119138.4	chr1_154453788_C_T_b38	rs4129267	0.55	Not an eGene	0.017
CHSY3	ENSG00000198108.3	chr1_154453788_C_T_b38	rs4129267	0.56	Not an eGene	0.019
KLHL9	ENSG00000198642.6	chr1_154453788_C_T_b38	rs4129267	0.57	Not an eGene	0.017
CSRP2	ENSG00000175183.9	chr1_154453788_C_T_b38	rs4129267	0.58	0.00012	0.018
IGFBP2	ENSG00000115457.9	chr1_154453788_C_T_b38	rs4129267	0.58	8.3e-05	-0.016
SRPX	ENSG00000101955.14	chr1_154453788_C_T_b38	rs4129267	0.59	0.00019	0.02
NR2F6	ENSG00000160113.5	chr1_154453788_C_T_b38	rs4129267	0.62	6.9e-05	0.016
TGFBR3	ENSG00000069702.10	chr1_154453788_C_T_b38	rs4129267	0.62	Not an eGene	-0.018
AKR1C3	ENSG00000196139.13	chr1_154453788_C_T_b38	rs4129267	0.63	Not an eGene	0.019
DSTN	ENSG00000125868.15	chr1_154453788_C_T_b38	rs4129267	0.63	Not an eGene	-0.01
ITGA8	ENSG00000077943.7	chr1_154453788_C_T_b38	rs4129267	0.63	0.0001	-0.014
WFS1	ENSG00000109501.13	chr1_154453788_C_T_b38	rs4129267	0.63	Not an eGene	-0.011
NUPR1	ENSG00000176046.8	chr1_154453788_C_T_b38	rs4129267	0.64	0.00016	0.021
SMOC2	ENSG00000112562.18	chr1_154453788_C_T_b38	rs4129267	0.64	7.5e-05	-0.017
TCEAL2	ENSG00000184905.8	chr1_154453788_C_T_b38	rs4129267	0.65	Not an eGene	0.012
ATP1A2	ENSG00000018625.14	chr1_154453788_C_T_b38	rs4129267	0.66	9.4e-05	-0.012
C2orf40	ENSG00000119147.9	chr1_154453788_C_T_b38	rs4129267	0.66	0.0001	0.022
KLHDC2	ENSG00000165516.10	chr1_154453788_C_T_b38	rs4129267	0.66	Not an eGene	0.013
TMEM47	ENSG00000147027.3	chr1_154453788_C_T_b38	rs4129267	0.66	0.00028	-0.011
MMP9	ENSG00000100985.7	chr1_154453788_C_T_b38	rs4129267	0.7	Not an eGene	0.022
FAM46B	ENSG00000158246.7	chr1_154453788_C_T_b38	rs4129267	0.72	Not an eGene	0.012
SIK1	ENSG00000142178.7	chr1_154453788_C_T_b38	rs4129267	0.72	0.0001	0.025
JAG1	ENSG00000101384.11	chr1_154453788_C_T_b38	rs4129267	0.73	Not an eGene	-0.012
LIMCH1	ENSG00000064042.17	chr1_154453788_C_T_b38	rs4129267	0.73	9e-05	0.01
ZBTB16	ENSG00000109906.13	chr1_154453788_C_T_b38	rs4129267	0.74	Not an eGene	0.0082
FERMT2	ENSG00000073712.14	chr1_154453788_C_T_b38	rs4129267	0.75	Not an eGene	0.0061
GFOD1	ENSG00000145990.10	chr1_154453788_C_T_b38	rs4129267	0.75	0.00012	0.011
GMDS	ENSG00000112699.10	chr1_154453788_C_T_b38	rs4129267	0.75	6.4e-05	-0.011
LTB	ENSG00000227507.2	chr1_154453788_C_T_b38	rs4129267	0.75	Not an eGene	0.014
NEXN	ENSG00000162614.18	chr1_154453788_C_T_b38	rs4129267	0.75	0.00016	-0.0049
YIPF6	ENSG00000181704.11	chr1_154453788_C_T_b38	rs4129267	0.75	0.00015	0.0088
ACTG2	ENSG00000163017.13	chr1_154453788_C_T_b38	rs4129267	0.77	Not an eGene	0.0093
CALD1	ENSG00000122786.19	chr1_154453788_C_T_b38	rs4129267	0.77	Not an eGene	-0.0067
EFHD1	ENSG00000115468.11	chr1_154453788_C_T_b38	rs4129267	0.77	0.0001	-0.007
RABGAP1	ENSG00000011454.16	chr1_154453788_C_T_b38	rs4129267	0.77	0.00012	0.01
MGP	ENSG00000111341.9	chr1_154453788_C_T_b38	rs4129267	0.78	0.00014	-0.0084
MT1M	ENSG00000205364.3	chr1_154453788_C_T_b38	rs4129267	0.78	7.8e-05	-0.01
PGRMC1	ENSG00000101856.9	chr1_154453788_C_T_b38	rs4129267	0.79	0.00015	0.0077
ADH1B	ENSG00000196616.13	chr1_154453788_C_T_b38	rs4129267	0.81	0.00014	-0.0083
CSNK2A2	ENSG00000070770.8	chr1_154453788_C_T_b38	rs4129267	0.81	Not an eGene	-0.0068
FCN1	ENSG00000085265.10	chr1_154453788_C_T_b38	rs4129267	0.82	Not an eGene	0.011
FRZB	ENSG00000162998.4	chr1_154453788_C_T_b38	rs4129267	0.82	0.00016	-0.008
ZNF462	ENSG00000148143.12	chr1_154453788_C_T_b38	rs4129267	0.82	Not an eGene	-0.008
CCDC102A	ENSG00000135736.5	chr1_154453788_C_T_b38	rs4129267	0.83	8.6e-05	0.0058
FAM129A	ENSG00000135842.16	chr1_154453788_C_T_b38	rs4129267	0.83	0.00015	-0.0038
IL6	ENSG00000136244.11	chr1_154453788_C_T_b38	rs4129267	0.83	Not an eGene	0.0079
SERPINA3	ENSG00000196136.17	chr1_154453788_C_T_b38	rs4129267	0.83	6.3e-05	-0.0063
TRPC1	ENSG00000144935.14	chr1_154453788_C_T_b38	rs4129267	0.83	Not an eGene	0.0054
PADI4	ENSG00000159339.13	chr1_154453788_C_T_b38	rs4129267	0.84	Not an eGene	0.012
GPD1L	ENSG00000152642.10	chr1_154453788_C_T_b38	rs4129267	0.85	7.8e-05	0.0052
TIMP4	ENSG00000157150.4	chr1_154453788_C_T_b38	rs4129267	0.85	0.00011	0.006
ATOH8	ENSG00000168874.12	chr1_154453788_C_T_b38	rs4129267	0.86	Not an eGene	-0.0053
METTL7A	ENSG00000185432.11	chr1_154453788_C_T_b38	rs4129267	0.86	0.00019	-0.0038
FOXO1	ENSG00000150907.7	chr1_154453788_C_T_b38	rs4129267	0.87	Not an eGene	0.005
RGS5	ENSG00000143248.12	chr1_154453788_C_T_b38	rs4129267	0.89	0.0001	0.004
BBX	ENSG00000114439.18	chr1_154453788_C_T_b38	rs4129267	0.9	Not an eGene	0.0031
CSRP1	ENSG00000159176.13	chr1_154453788_C_T_b38	rs4129267	0.9	Not an eGene	-0.0032
WDR82	ENSG00000164091.11	chr1_154453788_C_T_b38	rs4129267	0.9	0.0003	0.0029
FKBP5	ENSG00000096060.14	chr1_154453788_C_T_b38	rs4129267	0.92	Not an eGene	0.002
RCAN2	ENSG00000172348.14	chr1_154453788_C_T_b38	rs4129267	0.93	9.6e-05	0.0024
TC2N	ENSG00000165929.12	chr1_154453788_C_T_b38	rs4129267	0.93	9.1e-05	-0.0026
DUSP3	ENSG00000108861.8	chr1_154453788_C_T_b38	rs4129267	0.94	Not an eGene	-0.0023
MT1X	ENSG00000187193.8	chr1_154453788_C_T_b38	rs4129267	0.94	8.2e-05	0.0026
PPP1R14A	ENSG00000167641.10	chr1_154453788_C_T_b38	rs4129267	0.94	0.00019	0.0014
SLC25A4	ENSG00000151729.10	chr1_154453788_C_T_b38	rs4129267	0.94	5.2e-05	-0.0021
PHGDH	ENSG00000092621.11	chr1_154453788_C_T_b38	rs4129267	0.95	0.00016	-0.003
A2M	ENSG00000175899.14	chr1_154453788_C_T_b38	rs4129267	0.96	Not an eGene	0.0019
HSPB7	ENSG00000173641.17	chr1_154453788_C_T_b38	rs4129267	0.96	0.00011	-0.0016
PPP1R12C	ENSG00000125503.12	chr1_154453788_C_T_b38	rs4129267	1	Not an eGene	-9.1e-05
rs10757274
MAOA	ENSG00000189221.9	chr9_22096056_A_G_b38	rs10757274	0.00023	0.00018	-0.076
THBS2	ENSG00000186340.14	chr9_22096056_A_G_b38	rs10757274	0.003	8.2e-05	-0.089
NDN	ENSG00000182636.5	chr9_22096056_A_G_b38	rs10757274	0.013	7.4e-05	-0.12
FERMT2	ENSG00000073712.14	chr9_22096056_A_G_b38	rs10757274	0.028	Not an eGene	-0.042
HSPB2	ENSG00000170276.5	chr9_22096056_A_G_b38	rs10757274	0.036	0.00014	-0.056
RABGAP1	ENSG00000011454.16	chr9_22096056_A_G_b38	rs10757274	0.043	0.00012	-0.07
GPD1L	ENSG00000152642.10	chr9_22096056_A_G_b38	rs10757274	0.046	7.8e-05	-0.055
NXPH3	ENSG00000182575.7	chr9_22096056_A_G_b38	rs10757274	0.065	Not an eGene	-0.056
PPP1R3C	ENSG00000119938.8	chr9_22096056_A_G_b38	rs10757274	0.072	0.0002	0.068
FMOD	ENSG00000122176.10	chr9_22096056_A_G_b38	rs10757274	0.076	7.7e-05	-0.062
YIPF6	ENSG00000181704.11	chr9_22096056_A_G_b38	rs10757274	0.078	0.00015	-0.048
SIK1	ENSG00000142178.7	chr9_22096056_A_G_b38	rs10757274	0.099	0.0001	-0.11
LMOD1	ENSG00000163431.12	chr9_22096056_A_G_b38	rs10757274	0.1	8.8e-05	-0.04
ADH1B	ENSG00000196616.13	chr9_22096056_A_G_b38	rs10757274	0.11	0.00014	-0.055
GGNBP2	ENSG00000278311.4	chr9_22096056_A_G_b38	rs10757274	0.12	9.5e-05	0.051
SPARC	ENSG00000113140.10	chr9_22096056_A_G_b38	rs10757274	0.12	0.00011	0.061
GBP5	ENSG00000154451.14	chr9_22096056_A_G_b38	rs10757274	0.13	Not an eGene	-0.056
ZBTB16	ENSG00000109906.13	chr9_22096056_A_G_b38	rs10757274	0.13	Not an eGene	-0.038
AIF1L	ENSG00000126878.12	chr9_22096056_A_G_b38	rs10757274	0.15	8.3e-05	-0.092
KLF15	ENSG00000163884.3	chr9_22096056_A_G_b38	rs10757274	0.18	Not an eGene	-0.032
MGP	ENSG00000111341.9	chr9_22096056_A_G_b38	rs10757274	0.18	0.00014	0.041
RPL35A	ENSG00000182899.14	chr9_22096056_A_G_b38	rs10757274	0.18	Not an eGene	0.023
IL6	ENSG00000136244.11	chr9_22096056_A_G_b38	rs10757274	0.19	Not an eGene	0.05
IGFBP3	ENSG00000146674.14	chr9_22096056_A_G_b38	rs10757274	0.2	0.00012	0.071
LSM2	ENSG00000204392.10	chr9_22096056_A_G_b38	rs10757274	0.2	0.00019	-0.039
GMDS	ENSG00000112699.10	chr9_22096056_A_G_b38	rs10757274	0.21	6.4e-05	-0.044
NFIA	ENSG00000162599.15	chr9_22096056_A_G_b38	rs10757274	0.21	Not an eGene	-0.029
SRPX	ENSG00000101955.14	chr9_22096056_A_G_b38	rs10757274	0.21	0.00019	0.048
CAP2	ENSG00000112186.11	chr9_22096056_A_G_b38	rs10757274	0.22	0.00011	-0.03
IL2RB	ENSG00000100385.13	chr9_22096056_A_G_b38	rs10757274	0.24	Not an eGene	-0.039
PACSIN2	ENSG00000100266.18	chr9_22096056_A_G_b38	rs10757274	0.24	0.0001	-0.04
SMOC2	ENSG00000112562.18	chr9_22096056_A_G_b38	rs10757274	0.25	7.5e-05	-0.042
FRZB	ENSG00000162998.4	chr9_22096056_A_G_b38	rs10757274	0.26	0.00016	-0.039
BBX	ENSG00000114439.18	chr9_22096056_A_G_b38	rs10757274	0.27	Not an eGene	0.026
RBPMS2	ENSG00000166831.8	chr9_22096056_A_G_b38	rs10757274	0.27	0.0002	0.049
A2M	ENSG00000175899.14	chr9_22096056_A_G_b38	rs10757274	0.28	Not an eGene	-0.04
MYH10	ENSG00000133026.12	chr9_22096056_A_G_b38	rs10757274	0.28	7.9e-05	-0.028
TC2N	ENSG00000165929.12	chr9_22096056_A_G_b38	rs10757274	0.28	9.1e-05	-0.031
IGFBP6	ENSG00000167779.7	chr9_22096056_A_G_b38	rs10757274	0.29	Not an eGene	-0.039
FAM129A	ENSG00000135842.16	chr9_22096056_A_G_b38	rs10757274	0.3	0.00015	-0.019
HIGD1A	ENSG00000181061.13	chr9_22096056_A_G_b38	rs10757274	0.3	0.00014	0.028
HBB	ENSG00000244734.3	chr9_22096056_A_G_b38	rs10757274	0.31	Not an eGene	-0.054
LMCD1	ENSG00000071282.11	chr9_22096056_A_G_b38	rs10757274	0.31	6.1e-05	-0.033
HBA2	ENSG00000188536.12	chr9_22096056_A_G_b38	rs10757274	0.32	Not an eGene	-0.052
TCEAL2	ENSG00000184905.8	chr9_22096056_A_G_b38	rs10757274	0.32	Not an eGene	-0.026
JAG1	ENSG00000101384.11	chr9_22096056_A_G_b38	rs10757274	0.33	Not an eGene	-0.033
LTB	ENSG00000227507.2	chr9_22096056_A_G_b38	rs10757274	0.33	Not an eGene	0.044
WFS1	ENSG00000109501.13	chr9_22096056_A_G_b38	rs10757274	0.36	Not an eGene	-0.02
C2orf40	ENSG00000119147.9	chr9_22096056_A_G_b38	rs10757274	0.37	0.0001	-0.044
NOV	ENSG00000136999.4	chr9_22096056_A_G_b38	rs10757274	0.37	0.00014	0.023
TMEM14A	ENSG00000096092.5	chr9_22096056_A_G_b38	rs10757274	0.37	9.6e-05	-0.03
METTL7A	ENSG00000185432.11	chr9_22096056_A_G_b38	rs10757274	0.38	0.00019	0.019
MYH11	ENSG00000133392.17	chr9_22096056_A_G_b38	rs10757274	0.38	Not an eGene	0.017
ITK	ENSG00000113263.12	chr9_22096056_A_G_b38	rs10757274	0.39	Not an eGene	-0.027
CRYAB	ENSG00000109846.7	chr9_22096056_A_G_b38	rs10757274	0.42	Not an eGene	-0.024
KLHL9	ENSG00000198642.6	chr9_22096056_A_G_b38	rs10757274	0.42	Not an eGene	-0.024
CSPG4	ENSG00000173546.7	chr9_22096056_A_G_b38	rs10757274	0.43	Not an eGene	0.02
KLF9	ENSG00000119138.4	chr9_22096056_A_G_b38	rs10757274	0.43	Not an eGene	0.023
IL1B	ENSG00000125538.11	chr9_22096056_A_G_b38	rs10757274	0.46	Not an eGene	-0.034
WDR82	ENSG00000164091.11	chr9_22096056_A_G_b38	rs10757274	0.46	0.0003	-0.017
ITGA8	ENSG00000077943.7	chr9_22096056_A_G_b38	rs10757274	0.47	0.0001	-0.021
PHGDH	ENSG00000092621.11	chr9_22096056_A_G_b38	rs10757274	0.47	0.00016	0.036
CXXC5	ENSG00000171604.11	chr9_22096056_A_G_b38	rs10757274	0.5	0.00023	-0.018
CCR7	ENSG00000126353.3	chr9_22096056_A_G_b38	rs10757274	0.51	0.00015	-0.03
PALLD	ENSG00000129116.17	chr9_22096056_A_G_b38	rs10757274	0.51	0.00013	0.014
CNN1	ENSG00000130176.7	chr9_22096056_A_G_b38	rs10757274	0.52	Not an eGene	0.013
FHL5	ENSG00000112214.10	chr9_22096056_A_G_b38	rs10757274	0.52	0.00018	0.028
ITGA10	ENSG00000143127.12	chr9_22096056_A_G_b38	rs10757274	0.52	0.0002	-0.017
LIMCH1	ENSG00000064042.17	chr9_22096056_A_G_b38	rs10757274	0.52	9e-05	0.019
PADI4	ENSG00000159339.13	chr9_22096056_A_G_b38	rs10757274	0.54	Not an eGene	-0.036
TIMP4	ENSG00000157150.4	chr9_22096056_A_G_b38	rs10757274	0.54	0.00011	-0.02
ZNF462	ENSG00000148143.12	chr9_22096056_A_G_b38	rs10757274	0.54	Not an eGene	0.022
RCAN2	ENSG00000172348.14	chr9_22096056_A_G_b38	rs10757274	0.56	9.6e-05	0.015
IGFBP2	ENSG00000115457.9	chr9_22096056_A_G_b38	rs10757274	0.57	8.3e-05	0.016
PPP1R14A	ENSG00000167641.10	chr9_22096056_A_G_b38	rs10757274	0.57	0.00019	0.011
MMP9	ENSG00000100985.7	chr9_22096056_A_G_b38	rs10757274	0.59	Not an eGene	-0.031
HLA-DQB1	ENSG00000179344.16	chr9_22096056_A_G_b38	rs10757274	0.6	0.00015	0.028
KLHDC2	ENSG00000165516.10	chr9_22096056_A_G_b38	rs10757274	0.6	Not an eGene	-0.016
MT1M	ENSG00000205364.3	chr9_22096056_A_G_b38	rs10757274	0.6	7.8e-05	0.019
SLC25A4	ENSG00000151729.10	chr9_22096056_A_G_b38	rs10757274	0.6	5.2e-05	0.013
CBX6	ENSG00000183741.11	chr9_22096056_A_G_b38	rs10757274	0.61	0.0001	-0.013
PDLIM3	ENSG00000154553.13	chr9_22096056_A_G_b38	rs10757274	0.61	5.4e-05	-0.018
GFOD1	ENSG00000145990.10	chr9_22096056_A_G_b38	rs10757274	0.62	0.00012	0.017
TMEM47	ENSG00000147027.3	chr9_22096056_A_G_b38	rs10757274	0.62	0.00028	0.012
CPE	ENSG00000109472.13	chr9_22096056_A_G_b38	rs10757274	0.64	0.00011	-0.015
SERPINA3	ENSG00000196136.17	chr9_22096056_A_G_b38	rs10757274	0.65	6.3e-05	-0.014
ATP1A2	ENSG00000018625.14	chr9_22096056_A_G_b38	rs10757274	0.66	9.4e-05	0.012
CSNK2A2	ENSG00000070770.8	chr9_22096056_A_G_b38	rs10757274	0.67	Not an eGene	0.012
FHL1	ENSG00000022267.16	chr9_22096056_A_G_b38	rs10757274	0.67	0.00023	-0.013
CLN5	ENSG00000102805.14	chr9_22096056_A_G_b38	rs10757274	0.68	Not an eGene	0.016
AOC3	ENSG00000131471.6	chr9_22096056_A_G_b38	rs10757274	0.69	0.00022	0.014
CCL3	ENSG00000277632.1	chr9_22096056_A_G_b38	rs10757274	0.69	9.2e-05	-0.02
EFHD1	ENSG00000115468.11	chr9_22096056_A_G_b38	rs10757274	0.69	0.0001	0.0095
YAP1	ENSG00000137693.13	chr9_22096056_A_G_b38	rs10757274	0.69	Not an eGene	-0.0085
CSRP1	ENSG00000159176.13	chr9_22096056_A_G_b38	rs10757274	0.71	Not an eGene	0.0098
DUSP3	ENSG00000108861.8	chr9_22096056_A_G_b38	rs10757274	0.71	Not an eGene	-0.011
NEXN	ENSG00000162614.18	chr9_22096056_A_G_b38	rs10757274	0.73	0.00016	0.0055
ACTG2	ENSG00000163017.13	chr9_22096056_A_G_b38	rs10757274	0.74	Not an eGene	0.01
ANKRD46	ENSG00000186106.11	chr9_22096056_A_G_b38	rs10757274	0.74	Not an eGene	0.0097
PGRMC2	ENSG00000164040.16	chr9_22096056_A_G_b38	rs10757274	0.74	0.00016	0.012
CCDC102A	ENSG00000135736.5	chr9_22096056_A_G_b38	rs10757274	0.75	8.6e-05	-0.0084
FOSB	ENSG00000125740.13	chr9_22096056_A_G_b38	rs10757274	0.75	7.1e-05	-0.014
MFAP4	ENSG00000166482.11	chr9_22096056_A_G_b38	rs10757274	0.75	Not an eGene	0.01
MT1X	ENSG00000187193.8	chr9_22096056_A_G_b38	rs10757274	0.75	8.2e-05	-0.011
RAMP1	ENSG00000132329.10	chr9_22096056_A_G_b38	rs10757274	0.76	9.5e-05	0.0091
CALD1	ENSG00000122786.19	chr9_22096056_A_G_b38	rs10757274	0.78	Not an eGene	0.0064
DSTN	ENSG00000125868.15	chr9_22096056_A_G_b38	rs10757274	0.78	Not an eGene	-0.0058
NPTX2	ENSG00000106236.3	chr9_22096056_A_G_b38	rs10757274	0.78	0.00015	0.014
CTSZ	ENSG00000101160.13	chr9_22096056_A_G_b38	rs10757274	0.79	Not an eGene	0.0072
FCN1	ENSG00000085265.10	chr9_22096056_A_G_b38	rs10757274	0.79	Not an eGene	0.013
PPP1R12C	ENSG00000125503.12	chr9_22096056_A_G_b38	rs10757274	0.79	Not an eGene	-0.0075
PXDN	ENSG00000130508.10	chr9_22096056_A_G_b38	rs10757274	0.79	Not an eGene	0.0091
PGRMC1	ENSG00000101856.9	chr9_22096056_A_G_b38	rs10757274	0.8	0.00015	-0.0073
SPARCL1	ENSG00000152583.12	chr9_22096056_A_G_b38	rs10757274	0.8	0.00016	-0.0086
RGS5	ENSG00000143248.12	chr9_22096056_A_G_b38	rs10757274	0.81	0.0001	-0.0066
DDIT4	ENSG00000168209.4	chr9_22096056_A_G_b38	rs10757274	0.83	Not an eGene	0.0081
FKBP5	ENSG00000096060.14	chr9_22096056_A_G_b38	rs10757274	0.83	Not an eGene	0.0042
COX7A1	ENSG00000161281.10	chr9_22096056_A_G_b38	rs10757274	0.84	0.00012	0.0059
DACT3	ENSG00000197380.10	chr9_22096056_A_G_b38	rs10757274	0.84	Not an eGene	0.0037
RASL12	ENSG00000103710.10	chr9_22096056_A_G_b38	rs10757274	0.85	Not an eGene	0.0051
ATOH8	ENSG00000168874.12	chr9_22096056_A_G_b38	rs10757274	0.86	Not an eGene	0.0052
KCNMB1	ENSG00000145936.8	chr9_22096056_A_G_b38	rs10757274	0.86	9.6e-05	-0.0053
PKD2	ENSG00000118762.7	chr9_22096056_A_G_b38	rs10757274	0.86	Not an eGene	-0.0036
ADH1A	ENSG00000187758.7	chr9_22096056_A_G_b38	rs10757274	0.88	0.00016	-0.008
CHSY3	ENSG00000198108.3	chr9_22096056_A_G_b38	rs10757274	0.88	Not an eGene	0.0048
HSPB7	ENSG00000173641.17	chr9_22096056_A_G_b38	rs10757274	0.89	0.00011	-0.0044
SGCA	ENSG00000108823.15	chr9_22096056_A_G_b38	rs10757274	0.89	8.5e-05	0.0043
KCNA5	ENSG00000130037.4	chr9_22096056_A_G_b38	rs10757274	0.91	8.9e-05	-0.0039
PEBP1	ENSG00000089220.4	chr9_22096056_A_G_b38	rs10757274	0.91	9e-05	-0.0037
FAM46B	ENSG00000158246.7	chr9_22096056_A_G_b38	rs10757274	0.92	Not an eGene	0.0036
TRPC1	ENSG00000144935.14	chr9_22096056_A_G_b38	rs10757274	0.93	Not an eGene	-0.0023
GLDN	ENSG00000186417.13	chr9_22096056_A_G_b38	rs10757274	0.94	0.00019	0.0035
COX5B	ENSG00000135940.6	chr9_22096056_A_G_b38	rs10757274	0.95	Not an eGene	0.0015
FOXO1	ENSG00000150907.7	chr9_22096056_A_G_b38	rs10757274	0.95	Not an eGene	-0.0018
CYBRD1	ENSG00000071967.11	chr9_22096056_A_G_b38	rs10757274	0.96	0.00012	0.0024
CSRP2	ENSG00000175183.9	chr9_22096056_A_G_b38	rs10757274	0.97	0.00012	-0.0013
SCRG1	ENSG00000164106.7	chr9_22096056_A_G_b38	rs10757274	0.98	Not an eGene	-0.0007
TGFBR3	ENSG00000069702.10	chr9_22096056_A_G_b38	rs10757274	0.98	Not an eGene	0.0011
AKR1C3	ENSG00000196139.13	chr9_22096056_A_G_b38	rs10757274	0.99	Not an eGene	0.00047
NR2F6	ENSG00000160113.5	chr9_22096056_A_G_b38	rs10757274	0.99	6.9e-05	0.00047
NUPR1	ENSG00000176046.8	chr9_22096056_A_G_b38	rs10757274	0.99	0.00016	-0.00071
UCP2	ENSG00000175567.8	chr9_22096056_A_G_b38	rs10757274	0.99	0.00017	-0.00046
rs10985349
RAMP1	ENSG00000132329.10	chr9_121662964_C_T_b38	rs10985349	0.0061	9.5e-05	0.12
ITGA8	ENSG00000077943.7	chr9_121662964_C_T_b38	rs10985349	0.007	0.0001	0.11
NPTX2	ENSG00000106236.3	chr9_121662964_C_T_b38	rs10985349	0.012	0.00015	0.19
MFAP4	ENSG00000166482.11	chr9_121662964_C_T_b38	rs10985349	0.023	Not an eGene	0.11
AIF1L	ENSG00000126878.12	chr9_121662964_C_T_b38	rs10985349	0.026	8.3e-05	-0.21
EFHD1	ENSG00000115468.11	chr9_121662964_C_T_b38	rs10985349	0.035	0.0001	0.072
AOC3	ENSG00000131471.6	chr9_121662964_C_T_b38	rs10985349	0.036	0.00022	-0.11
PGRMC1	ENSG00000101856.9	chr9_121662964_C_T_b38	rs10985349	0.036	0.00015	0.088
RABGAP1	ENSG00000011454.16	chr9_121662964_C_T_b38	rs10985349	0.039	0.00012	-0.1
BBX	ENSG00000114439.18	chr9_121662964_C_T_b38	rs10985349	0.04	Not an eGene	-0.07
PEBP1	ENSG00000089220.4	chr9_121662964_C_T_b38	rs10985349	0.044	9e-05	-0.095
CCDC102A	ENSG00000135736.5	chr9_121662964_C_T_b38	rs10985349	0.047	8.6e-05	0.076
FRZB	ENSG00000162998.4	chr9_121662964_C_T_b38	rs10985349	0.049	0.00016	0.099
KCNA5	ENSG00000130037.4	chr9_121662964_C_T_b38	rs10985349	0.052	8.9e-05	-0.099
SPARCL1	ENSG00000152583.12	chr9_121662964_C_T_b38	rs10985349	0.055	0.00016	-0.094
FHL1	ENSG00000022267.16	chr9_121662964_C_T_b38	rs10985349	0.078	0.00023	0.08
RPL35A	ENSG00000182899.14	chr9_121662964_C_T_b38	rs10985349	0.08	Not an eGene	-0.044
CAP2	ENSG00000112186.11	chr9_121662964_C_T_b38	rs10985349	0.09	0.00011	0.061
TRPC1	ENSG00000144935.14	chr9_121662964_C_T_b38	rs10985349	0.092	Not an eGene	0.063
PPP1R14A	ENSG00000167641.10	chr9_121662964_C_T_b38	rs10985349	0.098	0.00019	0.048
HIGD1A	ENSG00000181061.13	chr9_121662964_C_T_b38	rs10985349	0.11	0.00014	-0.063
CCR7	ENSG00000126353.3	chr9_121662964_C_T_b38	rs10985349	0.12	0.00015	0.1
ATOH8	ENSG00000168874.12	chr9_121662964_C_T_b38	rs10985349	0.14	Not an eGene	0.062
AKR1C3	ENSG00000196139.13	chr9_121662964_C_T_b38	rs10985349	0.15	Not an eGene	-0.081
DACT3	ENSG00000197380.10	chr9_121662964_C_T_b38	rs10985349	0.15	Not an eGene	-0.038
SRPX	ENSG00000101955.14	chr9_121662964_C_T_b38	rs10985349	0.15	0.00019	0.079
KLHL9	ENSG00000198642.6	chr9_121662964_C_T_b38	rs10985349	0.17	Not an eGene	-0.059
MYH11	ENSG00000133392.17	chr9_121662964_C_T_b38	rs10985349	0.18	Not an eGene	-0.037
RCAN2	ENSG00000172348.14	chr9_121662964_C_T_b38	rs10985349	0.18	9.6e-05	0.051
KLF15	ENSG00000163884.3	chr9_121662964_C_T_b38	rs10985349	0.2	Not an eGene	-0.045
MGP	ENSG00000111341.9	chr9_121662964_C_T_b38	rs10985349	0.2	0.00014	-0.057
WDR82	ENSG00000164091.11	chr9_121662964_C_T_b38	rs10985349	0.22	0.0003	0.04
ATP1A2	ENSG00000018625.14	chr9_121662964_C_T_b38	rs10985349	0.23	9.4e-05	-0.048
PKD2	ENSG00000118762.7	chr9_121662964_C_T_b38	rs10985349	0.23	Not an eGene	0.036
TIMP4	ENSG00000157150.4	chr9_121662964_C_T_b38	rs10985349	0.25	0.00011	-0.055
C2orf40	ENSG00000119147.9	chr9_121662964_C_T_b38	rs10985349	0.27	0.0001	0.079
NDN	ENSG00000182636.5	chr9_121662964_C_T_b38	rs10985349	0.27	7.4e-05	-0.076
CYBRD1	ENSG00000071967.11	chr9_121662964_C_T_b38	rs10985349	0.28	0.00012	0.069
FCN1	ENSG00000085265.10	chr9_121662964_C_T_b38	rs10985349	0.28	Not an eGene	-0.078
PDLIM3	ENSG00000154553.13	chr9_121662964_C_T_b38	rs10985349	0.28	5.4e-05	0.056
PPP1R12C	ENSG00000125503.12	chr9_121662964_C_T_b38	rs10985349	0.28	Not an eGene	-0.044
UCP2	ENSG00000175567.8	chr9_121662964_C_T_b38	rs10985349	0.28	0.00017	-0.049
CLN5	ENSG00000102805.14	chr9_121662964_C_T_b38	rs10985349	0.3	Not an eGene	0.058
LMCD1	ENSG00000071282.11	chr9_121662964_C_T_b38	rs10985349	0.3	6.1e-05	-0.05
ACTG2	ENSG00000163017.13	chr9_121662964_C_T_b38	rs10985349	0.31	Not an eGene	-0.046
CSNK2A2	ENSG00000070770.8	chr9_121662964_C_T_b38	rs10985349	0.31	Not an eGene	-0.042
ADH1A	ENSG00000187758.7	chr9_121662964_C_T_b38	rs10985349	0.34	0.00016	-0.074
CNN1	ENSG00000130176.7	chr9_121662964_C_T_b38	rs10985349	0.34	Not an eGene	-0.027
IL6	ENSG00000136244.11	chr9_121662964_C_T_b38	rs10985349	0.34	Not an eGene	-0.052
LMOD1	ENSG00000163431.12	chr9_121662964_C_T_b38	rs10985349	0.34	8.8e-05	-0.035
TC2N	ENSG00000165929.12	chr9_121662964_C_T_b38	rs10985349	0.34	9.1e-05	-0.04
FMOD	ENSG00000122176.10	chr9_121662964_C_T_b38	rs10985349	0.36	7.7e-05	-0.047
ADH1B	ENSG00000196616.13	chr9_121662964_C_T_b38	rs10985349	0.37	0.00014	-0.045
NXPH3	ENSG00000182575.7	chr9_121662964_C_T_b38	rs10985349	0.37	Not an eGene	-0.039
TMEM14A	ENSG00000096092.5	chr9_121662964_C_T_b38	rs10985349	0.37	9.6e-05	0.044
IGFBP2	ENSG00000115457.9	chr9_121662964_C_T_b38	rs10985349	0.38	8.3e-05	0.037
ITK	ENSG00000113263.12	chr9_121662964_C_T_b38	rs10985349	0.38	Not an eGene	-0.041
KLHDC2	ENSG00000165516.10	chr9_121662964_C_T_b38	rs10985349	0.38	Not an eGene	-0.038
CSPG4	ENSG00000173546.7	chr9_121662964_C_T_b38	rs10985349	0.39	Not an eGene	0.031
GBP5	ENSG00000154451.14	chr9_121662964_C_T_b38	rs10985349	0.39	Not an eGene	0.047
SIK1	ENSG00000142178.7	chr9_121662964_C_T_b38	rs10985349	0.39	0.0001	-0.086
ZNF462	ENSG00000148143.12	chr9_121662964_C_T_b38	rs10985349	0.39	Not an eGene	0.045
CXXC5	ENSG00000171604.11	chr9_121662964_C_T_b38	rs10985349	0.4	0.00023	0.032
GPD1L	ENSG00000152642.10	chr9_121662964_C_T_b38	rs10985349	0.4	7.8e-05	0.034
SERPINA3	ENSG00000196136.17	chr9_121662964_C_T_b38	rs10985349	0.4	6.3e-05	0.036
SMOC2	ENSG00000112562.18	chr9_121662964_C_T_b38	rs10985349	0.4	7.5e-05	-0.044
CPE	ENSG00000109472.13	chr9_121662964_C_T_b38	rs10985349	0.41	0.00011	0.038
FOSB	ENSG00000125740.13	chr9_121662964_C_T_b38	rs10985349	0.41	7.1e-05	0.054
IGFBP6	ENSG00000167779.7	chr9_121662964_C_T_b38	rs10985349	0.41	Not an eGene	0.044
SLC25A4	ENSG00000151729.10	chr9_121662964_C_T_b38	rs10985349	0.41	5.2e-05	-0.03
CRYAB	ENSG00000109846.7	chr9_121662964_C_T_b38	rs10985349	0.42	Not an eGene	-0.035
THBS2	ENSG00000186340.14	chr9_121662964_C_T_b38	rs10985349	0.42	8.2e-05	0.035
FOXO1	ENSG00000150907.7	chr9_121662964_C_T_b38	rs10985349	0.43	Not an eGene	-0.035
CSRP1	ENSG00000159176.13	chr9_121662964_C_T_b38	rs10985349	0.44	Not an eGene	-0.03
FAM129A	ENSG00000135842.16	chr9_121662964_C_T_b38	rs10985349	0.45	0.00015	-0.02
GLDN	ENSG00000186417.13	chr9_121662964_C_T_b38	rs10985349	0.45	0.00019	0.055
IL1B	ENSG00000125538.11	chr9_121662964_C_T_b38	rs10985349	0.45	Not an eGene	-0.05
NUPR1	ENSG00000176046.8	chr9_121662964_C_T_b38	rs10985349	0.46	0.00016	0.048
PHGDH	ENSG00000092621.11	chr9_121662964_C_T_b38	rs10985349	0.46	0.00016	0.053
YAP1	ENSG00000137693.13	chr9_121662964_C_T_b38	rs10985349	0.47	Not an eGene	0.023
CCL3	ENSG00000277632.1	chr9_121662964_C_T_b38	rs10985349	0.48	9.2e-05	-0.053
LIMCH1	ENSG00000064042.17	chr9_121662964_C_T_b38	rs10985349	0.49	9e-05	0.03
MMP9	ENSG00000100985.7	chr9_121662964_C_T_b38	rs10985349	0.49	Not an eGene	-0.058
TCEAL2	ENSG00000184905.8	chr9_121662964_C_T_b38	rs10985349	0.49	Not an eGene	-0.027
DSTN	ENSG00000125868.15	chr9_121662964_C_T_b38	rs10985349	0.52	Not an eGene	0.02
SGCA	ENSG00000108823.15	chr9_121662964_C_T_b38	rs10985349	0.52	8.5e-05	-0.028
CHSY3	ENSG00000198108.3	chr9_121662964_C_T_b38	rs10985349	0.53	Not an eGene	0.03
A2M	ENSG00000175899.14	chr9_121662964_C_T_b38	rs10985349	0.55	Not an eGene	0.032
ANKRD46	ENSG00000186106.11	chr9_121662964_C_T_b38	rs10985349	0.55	Not an eGene	0.025
NR2F6	ENSG00000160113.5	chr9_121662964_C_T_b38	rs10985349	0.55	6.9e-05	0.028
COX5B	ENSG00000135940.6	chr9_121662964_C_T_b38	rs10985349	0.56	Not an eGene	-0.021
KCNMB1	ENSG00000145936.8	chr9_121662964_C_T_b38	rs10985349	0.56	9.6e-05	0.026
MAOA	ENSG00000189221.9	chr9_121662964_C_T_b38	rs10985349	0.57	0.00018	0.017
TMEM47	ENSG00000147027.3	chr9_121662964_C_T_b38	rs10985349	0.57	0.00028	0.02
FHL5	ENSG00000112214.10	chr9_121662964_C_T_b38	rs10985349	0.58	0.00018	-0.036
HSPB2	ENSG00000170276.5	chr9_121662964_C_T_b38	rs10985349	0.61	0.00014	0.02
HBB	ENSG00000244734.3	chr9_121662964_C_T_b38	rs10985349	0.62	Not an eGene	0.039
HLA-DQB1	ENSG00000179344.16	chr9_121662964_C_T_b38	rs10985349	0.63	0.00015	0.037
JAG1	ENSG00000101384.11	chr9_121662964_C_T_b38	rs10985349	0.63	Not an eGene	-0.023
LTB	ENSG00000227507.2	chr9_121662964_C_T_b38	rs10985349	0.64	Not an eGene	-0.031
SPARC	ENSG00000113140.10	chr9_121662964_C_T_b38	rs10985349	0.64	0.00011	-0.027
PADI4	ENSG00000159339.13	chr9_121662964_C_T_b38	rs10985349	0.65	Not an eGene	0.039
CALD1	ENSG00000122786.19	chr9_121662964_C_T_b38	rs10985349	0.66	Not an eGene	-0.015
ITGA10	ENSG00000143127.12	chr9_121662964_C_T_b38	rs10985349	0.69	0.0002	-0.015
CSRP2	ENSG00000175183.9	chr9_121662964_C_T_b38	rs10985349	0.7	0.00012	-0.018
KLF9	ENSG00000119138.4	chr9_121662964_C_T_b38	rs10985349	0.7	Not an eGene	0.016
FKBP5	ENSG00000096060.14	chr9_121662964_C_T_b38	rs10985349	0.71	Not an eGene	-0.011
METTL7A	ENSG00000185432.11	chr9_121662964_C_T_b38	rs10985349	0.71	0.00019	0.012
NEXN	ENSG00000162614.18	chr9_121662964_C_T_b38	rs10985349	0.71	0.00016	-0.0085
ZBTB16	ENSG00000109906.13	chr9_121662964_C_T_b38	rs10985349	0.73	Not an eGene	-0.013
YIPF6	ENSG00000181704.11	chr9_121662964_C_T_b38	rs10985349	0.74	0.00015	-0.013
COX7A1	ENSG00000161281.10	chr9_121662964_C_T_b38	rs10985349	0.75	0.00012	-0.014
PXDN	ENSG00000130508.10	chr9_121662964_C_T_b38	rs10985349	0.75	Not an eGene	0.016
NFIA	ENSG00000162599.15	chr9_121662964_C_T_b38	rs10985349	0.76	Not an eGene	-0.01
GMDS	ENSG00000112699.10	chr9_121662964_C_T_b38	rs10985349	0.77	6.4e-05	0.015
CBX6	ENSG00000183741.11	chr9_121662964_C_T_b38	rs10985349	0.78	0.0001	0.011
MT1M	ENSG00000205364.3	chr9_121662964_C_T_b38	rs10985349	0.78	7.8e-05	0.015
GGNBP2	ENSG00000278311.4	chr9_121662964_C_T_b38	rs10985349	0.79	9.5e-05	0.013
IGFBP3	ENSG00000146674.14	chr9_121662964_C_T_b38	rs10985349	0.79	0.00012	0.021
TGFBR3	ENSG00000069702.10	chr9_121662964_C_T_b38	rs10985349	0.79	Not an eGene	-0.014
HBA2	ENSG00000188536.12	chr9_121662964_C_T_b38	rs10985349	0.8	Not an eGene	0.02
RBPMS2	ENSG00000166831.8	chr9_121662964_C_T_b38	rs10985349	0.8	0.0002	-0.016
DDIT4	ENSG00000168209.4	chr9_121662964_C_T_b38	rs10985349	0.82	Not an eGene	0.013
MT1X	ENSG00000187193.8	chr9_121662964_C_T_b38	rs10985349	0.84	8.2e-05	0.0097
PPP1R3C	ENSG00000119938.8	chr9_121662964_C_T_b38	rs10985349	0.84	0.0002	-0.011
HSPB7	ENSG00000173641.17	chr9_121662964_C_T_b38	rs10985349	0.85	0.00011	-0.0089
PALLD	ENSG00000129116.17	chr9_121662964_C_T_b38	rs10985349	0.85	0.00013	0.0057
DUSP3	ENSG00000108861.8	chr9_121662964_C_T_b38	rs10985349	0.86	Not an eGene	0.008
RGS5	ENSG00000143248.12	chr9_121662964_C_T_b38	rs10985349	0.86	0.0001	0.007
LSM2	ENSG00000204392.10	chr9_121662964_C_T_b38	rs10985349	0.88	0.00019	0.0067
MYH10	ENSG00000133026.12	chr9_121662964_C_T_b38	rs10985349	0.88	7.9e-05	0.0055
SCRG1	ENSG00000164106.7	chr9_121662964_C_T_b38	rs10985349	0.89	Not an eGene	-0.0066
IL2RB	ENSG00000100385.13	chr9_121662964_C_T_b38	rs10985349	0.9	Not an eGene	0.006
GFOD1	ENSG00000145990.10	chr9_121662964_C_T_b38	rs10985349	0.92	0.00012	-0.005
FAM46B	ENSG00000158246.7	chr9_121662964_C_T_b38	rs10985349	0.94	Not an eGene	-0.0036
PACSIN2	ENSG00000100266.18	chr9_121662964_C_T_b38	rs10985349	0.94	0.0001	-0.0035
NOV	ENSG00000136999.4	chr9_121662964_C_T_b38	rs10985349	0.95	0.00014	0.0025
PGRMC2	ENSG00000164040.16	chr9_121662964_C_T_b38	rs10985349	0.95	0.00016	0.0033
RASL12	ENSG00000103710.10	chr9_121662964_C_T_b38	rs10985349	0.96	Not an eGene	-0.002
CTSZ	ENSG00000101160.13	chr9_121662964_C_T_b38	rs10985349	0.97	Not an eGene	0.0013
WFS1	ENSG00000109501.13	chr9_121662964_C_T_b38	rs10985349	0.97	Not an eGene	-0.0013
FERMT2	ENSG00000073712.14	chr9_121662964_C_T_b38	rs10985349	0.98	Not an eGene	0.00081
rs1795061
LIMCH1	ENSG00000064042.17	chr1_214235937_T_C_b38	rs1795061	0.0019	9e-05	-0.098
FOXO1	ENSG00000150907.7	chr1_214235937_T_C_b38	rs1795061	0.0078	Not an eGene	0.088
DUSP3	ENSG00000108861.8	chr1_214235937_T_C_b38	rs1795061	0.019	Not an eGene	0.078
RABGAP1	ENSG00000011454.16	chr1_214235937_T_C_b38	rs1795061	0.022	0.00012	-0.086
KLF9	ENSG00000119138.4	chr1_214235937_T_C_b38	rs1795061	0.035	Not an eGene	0.067
SPARC	ENSG00000113140.10	chr1_214235937_T_C_b38	rs1795061	0.037	0.00011	-0.089
MT1X	ENSG00000187193.8	chr1_214235937_T_C_b38	rs1795061	0.039	8.2e-05	0.075
SIK1	ENSG00000142178.7	chr1_214235937_T_C_b38	rs1795061	0.049	0.0001	-0.15
MT1M	ENSG00000205364.3	chr1_214235937_T_C_b38	rs1795061	0.061	7.8e-05	0.073
TGFBR3	ENSG00000069702.10	chr1_214235937_T_C_b38	rs1795061	0.067	Not an eGene	0.071
ANKRD46	ENSG00000186106.11	chr1_214235937_T_C_b38	rs1795061	0.095	Not an eGene	0.052
CTSZ	ENSG00000101160.13	chr1_214235937_T_C_b38	rs1795061	0.1	Not an eGene	-0.048
MYH11	ENSG00000133392.17	chr1_214235937_T_C_b38	rs1795061	0.11	Not an eGene	0.033
DDIT4	ENSG00000168209.4	chr1_214235937_T_C_b38	rs1795061	0.12	Not an eGene	-0.064
PACSIN2	ENSG00000100266.18	chr1_214235937_T_C_b38	rs1795061	0.12	0.0001	-0.056
GPD1L	ENSG00000152642.10	chr1_214235937_T_C_b38	rs1795061	0.13	7.8e-05	-0.045
NUPR1	ENSG00000176046.8	chr1_214235937_T_C_b38	rs1795061	0.13	0.00016	0.072
FERMT2	ENSG00000073712.14	chr1_214235937_T_C_b38	rs1795061	0.15	Not an eGene	0.03
GLDN	ENSG00000186417.13	chr1_214235937_T_C_b38	rs1795061	0.15	0.00019	-0.078
IGFBP6	ENSG00000167779.7	chr1_214235937_T_C_b38	rs1795061	0.16	Not an eGene	0.056
ADH1B	ENSG00000196616.13	chr1_214235937_T_C_b38	rs1795061	0.17	0.00014	0.051
ACTG2	ENSG00000163017.13	chr1_214235937_T_C_b38	rs1795061	0.18	Not an eGene	-0.046
NXPH3	ENSG00000182575.7	chr1_214235937_T_C_b38	rs1795061	0.18	Not an eGene	-0.045
RASL12	ENSG00000103710.10	chr1_214235937_T_C_b38	rs1795061	0.18	Not an eGene	-0.039
PDLIM3	ENSG00000154553.13	chr1_214235937_T_C_b38	rs1795061	0.19	5.4e-05	0.051
RGS5	ENSG00000143248.12	chr1_214235937_T_C_b38	rs1795061	0.19	0.0001	-0.039
CNN1	ENSG00000130176.7	chr1_214235937_T_C_b38	rs1795061	0.2	Not an eGene	0.027
NPTX2	ENSG00000106236.3	chr1_214235937_T_C_b38	rs1795061	0.21	0.00015	0.071
FHL5	ENSG00000112214.10	chr1_214235937_T_C_b38	rs1795061	0.22	0.00018	-0.059
PKD2	ENSG00000118762.7	chr1_214235937_T_C_b38	rs1795061	0.22	Not an eGene	0.027
ITGA8	ENSG00000077943.7	chr1_214235937_T_C_b38	rs1795061	0.23	0.0001	0.038
A2M	ENSG00000175899.14	chr1_214235937_T_C_b38	rs1795061	0.25	Not an eGene	0.047
AKR1C3	ENSG00000196139.13	chr1_214235937_T_C_b38	rs1795061	0.25	Not an eGene	-0.048
CPE	ENSG00000109472.13	chr1_214235937_T_C_b38	rs1795061	0.25	0.00011	0.041
HSPB7	ENSG00000173641.17	chr1_214235937_T_C_b38	rs1795061	0.26	0.00011	-0.039
KLF15	ENSG00000163884.3	chr1_214235937_T_C_b38	rs1795061	0.26	Not an eGene	-0.03
TCEAL2	ENSG00000184905.8	chr1_214235937_T_C_b38	rs1795061	0.26	Not an eGene	0.033
CSRP2	ENSG00000175183.9	chr1_214235937_T_C_b38	rs1795061	0.27	0.00012	-0.039
HSPB2	ENSG00000170276.5	chr1_214235937_T_C_b38	rs1795061	0.27	0.00014	-0.032
IGFBP3	ENSG00000146674.14	chr1_214235937_T_C_b38	rs1795061	0.27	0.00012	0.066
MFAP4	ENSG00000166482.11	chr1_214235937_T_C_b38	rs1795061	0.27	Not an eGene	0.04
CRYAB	ENSG00000109846.7	chr1_214235937_T_C_b38	rs1795061	0.28	Not an eGene	-0.035
FMOD	ENSG00000122176.10	chr1_214235937_T_C_b38	rs1795061	0.28	7.7e-05	0.041
GBP5	ENSG00000154451.14	chr1_214235937_T_C_b38	rs1795061	0.28	Not an eGene	-0.044
CCL3	ENSG00000277632.1	chr1_214235937_T_C_b38	rs1795061	0.3	9.2e-05	-0.058
CALD1	ENSG00000122786.19	chr1_214235937_T_C_b38	rs1795061	0.31	Not an eGene	0.025
FRZB	ENSG00000162998.4	chr1_214235937_T_C_b38	rs1795061	0.32	0.00016	0.037
GGNBP2	ENSG00000278311.4	chr1_214235937_T_C_b38	rs1795061	0.32	9.5e-05	-0.035
TMEM47	ENSG00000147027.3	chr1_214235937_T_C_b38	rs1795061	0.32	0.00028	0.026
METTL7A	ENSG00000185432.11	chr1_214235937_T_C_b38	rs1795061	0.34	0.00019	0.022
PGRMC1	ENSG00000101856.9	chr1_214235937_T_C_b38	rs1795061	0.34	0.00015	0.03
CLN5	ENSG00000102805.14	chr1_214235937_T_C_b38	rs1795061	0.35	Not an eGene	0.039
IL6	ENSG00000136244.11	chr1_214235937_T_C_b38	rs1795061	0.35	Not an eGene	0.038
TMEM14A	ENSG00000096092.5	chr1_214235937_T_C_b38	rs1795061	0.35	9.6e-05	-0.034
CBX6	ENSG00000183741.11	chr1_214235937_T_C_b38	rs1795061	0.36	0.0001	0.026
SGCA	ENSG00000108823.15	chr1_214235937_T_C_b38	rs1795061	0.36	8.5e-05	-0.03
LMOD1	ENSG00000163431.12	chr1_214235937_T_C_b38	rs1795061	0.37	8.8e-05	-0.024
NOV	ENSG00000136999.4	chr1_214235937_T_C_b38	rs1795061	0.38	0.00014	0.024
AOC3	ENSG00000131471.6	chr1_214235937_T_C_b38	rs1795061	0.39	0.00022	-0.034
PEBP1	ENSG00000089220.4	chr1_214235937_T_C_b38	rs1795061	0.4	9e-05	-0.03
PPP1R14A	ENSG00000167641.10	chr1_214235937_T_C_b38	rs1795061	0.4	0.00019	-0.018
CAP2	ENSG00000112186.11	chr1_214235937_T_C_b38	rs1795061	0.41	0.00011	-0.022
PALLD	ENSG00000129116.17	chr1_214235937_T_C_b38	rs1795061	0.43	0.00013	-0.017
RBPMS2	ENSG00000166831.8	chr1_214235937_T_C_b38	rs1795061	0.43	0.0002	-0.038
COX5B	ENSG00000135940.6	chr1_214235937_T_C_b38	rs1795061	0.44	Not an eGene	-0.02
NR2F6	ENSG00000160113.5	chr1_214235937_T_C_b38	rs1795061	0.44	6.9e-05	0.028
LTB	ENSG00000227507.2	chr1_214235937_T_C_b38	rs1795061	0.45	Not an eGene	-0.037
CSRP1	ENSG00000159176.13	chr1_214235937_T_C_b38	rs1795061	0.47	Not an eGene	0.021
RPL35A	ENSG00000182899.14	chr1_214235937_T_C_b38	rs1795061	0.47	Not an eGene	0.014
ATOH8	ENSG00000168874.12	chr1_214235937_T_C_b38	rs1795061	0.48	Not an eGene	-0.022
SMOC2	ENSG00000112562.18	chr1_214235937_T_C_b38	rs1795061	0.48	7.5e-05	0.028
YAP1	ENSG00000137693.13	chr1_214235937_T_C_b38	rs1795061	0.48	Not an eGene	0.017
HIGD1A	ENSG00000181061.13	chr1_214235937_T_C_b38	rs1795061	0.49	0.00014	0.02
FCN1	ENSG00000085265.10	chr1_214235937_T_C_b38	rs1795061	0.5	Not an eGene	-0.036
IL2RB	ENSG00000100385.13	chr1_214235937_T_C_b38	rs1795061	0.5	Not an eGene	-0.024
ITGA10	ENSG00000143127.12	chr1_214235937_T_C_b38	rs1795061	0.5	0.0002	0.019
KCNMB1	ENSG00000145936.8	chr1_214235937_T_C_b38	rs1795061	0.5	9.6e-05	0.022
NEXN	ENSG00000162614.18	chr1_214235937_T_C_b38	rs1795061	0.51	0.00016	0.011
THBS2	ENSG00000186340.14	chr1_214235937_T_C_b38	rs1795061	0.52	8.2e-05	0.021
HBB	ENSG00000244734.3	chr1_214235937_T_C_b38	rs1795061	0.53	Not an eGene	-0.037
PHGDH	ENSG00000092621.11	chr1_214235937_T_C_b38	rs1795061	0.53	0.00016	0.033
ATP1A2	ENSG00000018625.14	chr1_214235937_T_C_b38	rs1795061	0.54	9.4e-05	-0.019
ZNF462	ENSG00000148143.12	chr1_214235937_T_C_b38	rs1795061	0.54	Not an eGene	-0.024
AIF1L	ENSG00000126878.12	chr1_214235937_T_C_b38	rs1795061	0.55	8.3e-05	0.042
MAOA	ENSG00000189221.9	chr1_214235937_T_C_b38	rs1795061	0.55	0.00018	-0.014
COX7A1	ENSG00000161281.10	chr1_214235937_T_C_b38	rs1795061	0.56	0.00012	0.019
CXXC5	ENSG00000171604.11	chr1_214235937_T_C_b38	rs1795061	0.56	0.00023	-0.017
EFHD1	ENSG00000115468.11	chr1_214235937_T_C_b38	rs1795061	0.56	0.0001	-0.015
KLHL9	ENSG00000198642.6	chr1_214235937_T_C_b38	rs1795061	0.57	Not an eGene	-0.018
ZBTB16	ENSG00000109906.13	chr1_214235937_T_C_b38	rs1795061	0.57	Not an eGene	-0.016
MMP9	ENSG00000100985.7	chr1_214235937_T_C_b38	rs1795061	0.58	Not an eGene	-0.034
FOSB	ENSG00000125740.13	chr1_214235937_T_C_b38	rs1795061	0.59	7.1e-05	0.026
C2orf40	ENSG00000119147.9	chr1_214235937_T_C_b38	rs1795061	0.6	0.0001	-0.028
HBA2	ENSG00000188536.12	chr1_214235937_T_C_b38	rs1795061	0.6	Not an eGene	-0.03
ITK	ENSG00000113263.12	chr1_214235937_T_C_b38	rs1795061	0.6	Not an eGene	-0.018
DACT3	ENSG00000197380.10	chr1_214235937_T_C_b38	rs1795061	0.61	Not an eGene	0.0099
GMDS	ENSG00000112699.10	chr1_214235937_T_C_b38	rs1795061	0.61	6.4e-05	-0.019
IL1B	ENSG00000125538.11	chr1_214235937_T_C_b38	rs1795061	0.61	Not an eGene	0.025
CCR7	ENSG00000126353.3	chr1_214235937_T_C_b38	rs1795061	0.62	0.00015	-0.025
SCRG1	ENSG00000164106.7	chr1_214235937_T_C_b38	rs1795061	0.63	Not an eGene	0.017
PXDN	ENSG00000130508.10	chr1_214235937_T_C_b38	rs1795061	0.65	Not an eGene	0.017
ADH1A	ENSG00000187758.7	chr1_214235937_T_C_b38	rs1795061	0.67	0.00016	0.025
MGP	ENSG00000111341.9	chr1_214235937_T_C_b38	rs1795061	0.67	0.00014	-0.014
BBX	ENSG00000114439.18	chr1_214235937_T_C_b38	rs1795061	0.68	Not an eGene	-0.011
KCNA5	ENSG00000130037.4	chr1_214235937_T_C_b38	rs1795061	0.68	8.9e-05	-0.016
MYH10	ENSG00000133026.12	chr1_214235937_T_C_b38	rs1795061	0.68	7.9e-05	0.012
PPP1R3C	ENSG00000119938.8	chr1_214235937_T_C_b38	rs1795061	0.68	0.0002	0.017
DSTN	ENSG00000125868.15	chr1_214235937_T_C_b38	rs1795061	0.69	Not an eGene	0.0092
FAM129A	ENSG00000135842.16	chr1_214235937_T_C_b38	rs1795061	0.69	0.00015	0.0079
TIMP4	ENSG00000157150.4	chr1_214235937_T_C_b38	rs1795061	0.69	0.00011	0.014
CSNK2A2	ENSG00000070770.8	chr1_214235937_T_C_b38	rs1795061	0.7	Not an eGene	-0.012
HLA-DQB1	ENSG00000179344.16	chr1_214235937_T_C_b38	rs1795061	0.7	0.00015	-0.022
UCP2	ENSG00000175567.8	chr1_214235937_T_C_b38	rs1795061	0.7	0.00017	0.013
CHSY3	ENSG00000198108.3	chr1_214235937_T_C_b38	rs1795061	0.72	Not an eGene	-0.012
CCDC102A	ENSG00000135736.5	chr1_214235937_T_C_b38	rs1795061	0.73	8.6e-05	-0.0098
WDR82	ENSG00000164091.11	chr1_214235937_T_C_b38	rs1795061	0.73	0.0003	-0.0084
GFOD1	ENSG00000145990.10	chr1_214235937_T_C_b38	rs1795061	0.75	0.00012	-0.012
WFS1	ENSG00000109501.13	chr1_214235937_T_C_b38	rs1795061	0.77	Not an eGene	0.0072
FAM46B	ENSG00000158246.7	chr1_214235937_T_C_b38	rs1795061	0.79	Not an eGene	0.01
SERPINA3	ENSG00000196136.17	chr1_214235937_T_C_b38	rs1795061	0.81	6.3e-05	-0.0078
SPARCL1	ENSG00000152583.12	chr1_214235937_T_C_b38	rs1795061	0.81	0.00016	0.0088
TC2N	ENSG00000165929.12	chr1_214235937_T_C_b38	rs1795061	0.81	9.1e-05	-0.0074
LSM2	ENSG00000204392.10	chr1_214235937_T_C_b38	rs1795061	0.84	0.00019	-0.0069
PADI4	ENSG00000159339.13	chr1_214235937_T_C_b38	rs1795061	0.84	Not an eGene	-0.013
SRPX	ENSG00000101955.14	chr1_214235937_T_C_b38	rs1795061	0.86	0.00019	-0.0074
FHL1	ENSG00000022267.16	chr1_214235937_T_C_b38	rs1795061	0.88	0.00023	-0.0051
TRPC1	ENSG00000144935.14	chr1_214235937_T_C_b38	rs1795061	0.89	Not an eGene	0.0038
SLC25A4	ENSG00000151729.10	chr1_214235937_T_C_b38	rs1795061	0.9	5.2e-05	0.0036
CYBRD1	ENSG00000071967.11	chr1_214235937_T_C_b38	rs1795061	0.91	0.00012	-0.0051
KLHDC2	ENSG00000165516.10	chr1_214235937_T_C_b38	rs1795061	0.92	Not an eGene	-0.0032
PPP1R12C	ENSG00000125503.12	chr1_214235937_T_C_b38	rs1795061	0.92	Not an eGene	0.0032
FKBP5	ENSG00000096060.14	chr1_214235937_T_C_b38	rs1795061	0.93	Not an eGene	0.0018
NDN	ENSG00000182636.5	chr1_214235937_T_C_b38	rs1795061	0.93	7.4e-05	-0.0043
RAMP1	ENSG00000132329.10	chr1_214235937_T_C_b38	rs1795061	0.95	9.5e-05	0.0021
IGFBP2	ENSG00000115457.9	chr1_214235937_T_C_b38	rs1795061	0.96	8.3e-05	0.0014
JAG1	ENSG00000101384.11	chr1_214235937_T_C_b38	rs1795061	0.97	Not an eGene	0.0013
LMCD1	ENSG00000071282.11	chr1_214235937_T_C_b38	rs1795061	0.97	6.1e-05	-0.0016
RCAN2	ENSG00000172348.14	chr1_214235937_T_C_b38	rs1795061	0.97	9.6e-05	-0.0011
CSPG4	ENSG00000173546.7	chr1_214235937_T_C_b38	rs1795061	0.98	Not an eGene	0.00068
YIPF6	ENSG00000181704.11	chr1_214235937_T_C_b38	rs1795061	0.99	0.00015	0.00034
NFIA	ENSG00000162599.15	chr1_214235937_T_C_b38	rs1795061	1	Not an eGene	-5.8e-05
PGRMC2	ENSG00000164040.16	chr1_214235937_T_C_b38	rs1795061	1	0.00016	0.00021
rs9316871
SPARC	ENSG00000113140.10	chr13_22287782_A_G_b38	rs9316871	0.0059	0.00011	0.13
LMCD1	ENSG00000071282.11	chr13_22287782_A_G_b38	rs9316871	0.0095	6.1e-05	0.11
MFAP4	ENSG00000166482.11	chr13_22287782_A_G_b38	rs9316871	0.01	Not an eGene	0.1
KCNA5	ENSG00000130037.4	chr13_22287782_A_G_b38	rs9316871	0.019	8.9e-05	-0.1
PPP1R3C	ENSG00000119938.8	chr13_22287782_A_G_b38	rs9316871	0.024	0.0002	0.11
SIK1	ENSG00000142178.7	chr13_22287782_A_G_b38	rs9316871	0.026	0.0001	-0.19
CALD1	ENSG00000122786.19	chr13_22287782_A_G_b38	rs9316871	0.029	Not an eGene	0.062
SCRG1	ENSG00000164106.7	chr13_22287782_A_G_b38	rs9316871	0.031	Not an eGene	-0.086
RPL35A	ENSG00000182899.14	chr13_22287782_A_G_b38	rs9316871	0.035	Not an eGene	0.045
FAM129A	ENSG00000135842.16	chr13_22287782_A_G_b38	rs9316871	0.053	0.00015	0.044
HSPB7	ENSG00000173641.17	chr13_22287782_A_G_b38	rs9316871	0.069	0.00011	0.072
C2orf40	ENSG00000119147.9	chr13_22287782_A_G_b38	rs9316871	0.076	0.0001	0.11
ITGA8	ENSG00000077943.7	chr13_22287782_A_G_b38	rs9316871	0.086	0.0001	0.062
CXXC5	ENSG00000171604.11	chr13_22287782_A_G_b38	rs9316871	0.087	0.00023	0.056
UCP2	ENSG00000175567.8	chr13_22287782_A_G_b38	rs9316871	0.095	0.00017	-0.064
IL1B	ENSG00000125538.11	chr13_22287782_A_G_b38	rs9316871	0.1	Not an eGene	0.093
COX7A1	ENSG00000161281.10	chr13_22287782_A_G_b38	rs9316871	0.12	0.00012	0.057
NDN	ENSG00000182636.5	chr13_22287782_A_G_b38	rs9316871	0.12	7.4e-05	0.09
IGFBP2	ENSG00000115457.9	chr13_22287782_A_G_b38	rs9316871	0.13	8.3e-05	-0.054
PXDN	ENSG00000130508.10	chr13_22287782_A_G_b38	rs9316871	0.15	Not an eGene	0.06
CYBRD1	ENSG00000071967.11	chr13_22287782_A_G_b38	rs9316871	0.17	0.00012	-0.075
FCN1	ENSG00000085265.10	chr13_22287782_A_G_b38	rs9316871	0.17	Not an eGene	0.084
LTB	ENSG00000227507.2	chr13_22287782_A_G_b38	rs9316871	0.17	Not an eGene	0.078
A2M	ENSG00000175899.14	chr13_22287782_A_G_b38	rs9316871	0.18	Not an eGene	-0.063
ADH1A	ENSG00000187758.7	chr13_22287782_A_G_b38	rs9316871	0.18	0.00016	0.087
FMOD	ENSG00000122176.10	chr13_22287782_A_G_b38	rs9316871	0.18	7.7e-05	0.058
YAP1	ENSG00000137693.13	chr13_22287782_A_G_b38	rs9316871	0.18	Not an eGene	0.035
GGNBP2	ENSG00000278311.4	chr13_22287782_A_G_b38	rs9316871	0.19	9.5e-05	0.053
FERMT2	ENSG00000073712.14	chr13_22287782_A_G_b38	rs9316871	0.21	Not an eGene	0.029
HSPB2	ENSG00000170276.5	chr13_22287782_A_G_b38	rs9316871	0.21	0.00014	0.042
KLF15	ENSG00000163884.3	chr13_22287782_A_G_b38	rs9316871	0.21	Not an eGene	-0.038
NFIA	ENSG00000162599.15	chr13_22287782_A_G_b38	rs9316871	0.22	Not an eGene	-0.036
TRPC1	ENSG00000144935.14	chr13_22287782_A_G_b38	rs9316871	0.22	Not an eGene	-0.039
KLF9	ENSG00000119138.4	chr13_22287782_A_G_b38	rs9316871	0.23	Not an eGene	-0.043
MYH11	ENSG00000133392.17	chr13_22287782_A_G_b38	rs9316871	0.23	Not an eGene	-0.028
TMEM47	ENSG00000147027.3	chr13_22287782_A_G_b38	rs9316871	0.23	0.00028	-0.037
THBS2	ENSG00000186340.14	chr13_22287782_A_G_b38	rs9316871	0.26	8.2e-05	-0.043
LIMCH1	ENSG00000064042.17	chr13_22287782_A_G_b38	rs9316871	0.27	9e-05	0.04
IL6	ENSG00000136244.11	chr13_22287782_A_G_b38	rs9316871	0.3	Not an eGene	0.049
KLHDC2	ENSG00000165516.10	chr13_22287782_A_G_b38	rs9316871	0.3	Not an eGene	0.039
DUSP3	ENSG00000108861.8	chr13_22287782_A_G_b38	rs9316871	0.31	Not an eGene	-0.039
RASL12	ENSG00000103710.10	chr13_22287782_A_G_b38	rs9316871	0.31	Not an eGene	0.034
CCDC102A	ENSG00000135736.5	chr13_22287782_A_G_b38	rs9316871	0.32	8.6e-05	-0.032
IL2RB	ENSG00000100385.13	chr13_22287782_A_G_b38	rs9316871	0.32	Not an eGene	0.041
KCNMB1	ENSG00000145936.8	chr13_22287782_A_G_b38	rs9316871	0.32	9.6e-05	0.038
CCR7	ENSG00000126353.3	chr13_22287782_A_G_b38	rs9316871	0.33	0.00015	-0.055
FRZB	ENSG00000162998.4	chr13_22287782_A_G_b38	rs9316871	0.33	0.00016	0.042
NR2F6	ENSG00000160113.5	chr13_22287782_A_G_b38	rs9316871	0.33	6.9e-05	0.039
GBP5	ENSG00000154451.14	chr13_22287782_A_G_b38	rs9316871	0.34	Not an eGene	0.044
PKD2	ENSG00000118762.7	chr13_22287782_A_G_b38	rs9316871	0.34	Not an eGene	0.024
SRPX	ENSG00000101955.14	chr13_22287782_A_G_b38	rs9316871	0.34	0.00019	-0.045
LMOD1	ENSG00000163431.12	chr13_22287782_A_G_b38	rs9316871	0.37	8.8e-05	-0.028
MGP	ENSG00000111341.9	chr13_22287782_A_G_b38	rs9316871	0.37	0.00014	0.034
TIMP4	ENSG00000157150.4	chr13_22287782_A_G_b38	rs9316871	0.37	0.00011	-0.036
GLDN	ENSG00000186417.13	chr13_22287782_A_G_b38	rs9316871	0.38	0.00019	-0.055
NOV	ENSG00000136999.4	chr13_22287782_A_G_b38	rs9316871	0.38	0.00014	0.028
ATOH8	ENSG00000168874.12	chr13_22287782_A_G_b38	rs9316871	0.39	Not an eGene	0.031
DSTN	ENSG00000125868.15	chr13_22287782_A_G_b38	rs9316871	0.39	Not an eGene	-0.022
CPE	ENSG00000109472.13	chr13_22287782_A_G_b38	rs9316871	0.41	0.00011	0.033
CAP2	ENSG00000112186.11	chr13_22287782_A_G_b38	rs9316871	0.42	0.00011	0.025
ANKRD46	ENSG00000186106.11	chr13_22287782_A_G_b38	rs9316871	0.43	Not an eGene	0.028
CLN5	ENSG00000102805.14	chr13_22287782_A_G_b38	rs9316871	0.43	Not an eGene	0.038
RABGAP1	ENSG00000011454.16	chr13_22287782_A_G_b38	rs9316871	0.43	0.00012	-0.034
AKR1C3	ENSG00000196139.13	chr13_22287782_A_G_b38	rs9316871	0.44	Not an eGene	0.037
PACSIN2	ENSG00000100266.18	chr13_22287782_A_G_b38	rs9316871	0.45	0.0001	0.031
CHSY3	ENSG00000198108.3	chr13_22287782_A_G_b38	rs9316871	0.47	Not an eGene	0.029
PALLD	ENSG00000129116.17	chr13_22287782_A_G_b38	rs9316871	0.47	0.00013	-0.018
SERPINA3	ENSG00000196136.17	chr13_22287782_A_G_b38	rs9316871	0.47	6.3e-05	0.027
MAOA	ENSG00000189221.9	chr13_22287782_A_G_b38	rs9316871	0.48	0.00018	0.018
SPARCL1	ENSG00000152583.12	chr13_22287782_A_G_b38	rs9316871	0.49	0.00016	-0.029
BBX	ENSG00000114439.18	chr13_22287782_A_G_b38	rs9316871	0.51	Not an eGene	-0.019
MYH10	ENSG00000133026.12	chr13_22287782_A_G_b38	rs9316871	0.51	7.9e-05	0.021
CNN1	ENSG00000130176.7	chr13_22287782_A_G_b38	rs9316871	0.53	Not an eGene	-0.015
CSRP1	ENSG00000159176.13	chr13_22287782_A_G_b38	rs9316871	0.53	Not an eGene	-0.02
GMDS	ENSG00000112699.10	chr13_22287782_A_G_b38	rs9316871	0.53	6.4e-05	0.027
ITK	ENSG00000113263.12	chr13_22287782_A_G_b38	rs9316871	0.53	Not an eGene	0.025
PGRMC2	ENSG00000164040.16	chr13_22287782_A_G_b38	rs9316871	0.53	0.00016	0.029
FAM46B	ENSG00000158246.7	chr13_22287782_A_G_b38	rs9316871	0.54	Not an eGene	-0.026
NPTX2	ENSG00000106236.3	chr13_22287782_A_G_b38	rs9316871	0.55	0.00015	0.039
PADI4	ENSG00000159339.13	chr13_22287782_A_G_b38	rs9316871	0.55	Not an eGene	0.044
DACT3	ENSG00000197380.10	chr13_22287782_A_G_b38	rs9316871	0.56	Not an eGene	-0.013
FKBP5	ENSG00000096060.14	chr13_22287782_A_G_b38	rs9316871	0.56	Not an eGene	0.014
FOSB	ENSG00000125740.13	chr13_22287782_A_G_b38	rs9316871	0.56	7.1e-05	0.032
RCAN2	ENSG00000172348.14	chr13_22287782_A_G_b38	rs9316871	0.56	9.6e-05	-0.019
TGFBR3	ENSG00000069702.10	chr13_22287782_A_G_b38	rs9316871	0.56	Not an eGene	-0.026
EFHD1	ENSG00000115468.11	chr13_22287782_A_G_b38	rs9316871	0.58	0.0001	0.016
CCL3	ENSG00000277632.1	chr13_22287782_A_G_b38	rs9316871	0.59	9.2e-05	0.034
AOC3	ENSG00000131471.6	chr13_22287782_A_G_b38	rs9316871	0.63	0.00022	-0.021
MT1X	ENSG00000187193.8	chr13_22287782_A_G_b38	rs9316871	0.63	8.2e-05	-0.02
PPP1R12C	ENSG00000125503.12	chr13_22287782_A_G_b38	rs9316871	0.63	Not an eGene	0.017
RGS5	ENSG00000143248.12	chr13_22287782_A_G_b38	rs9316871	0.63	0.0001	0.017
CSNK2A2	ENSG00000070770.8	chr13_22287782_A_G_b38	rs9316871	0.64	Not an eGene	0.016
NXPH3	ENSG00000182575.7	chr13_22287782_A_G_b38	rs9316871	0.65	Not an eGene	0.017
DDIT4	ENSG00000168209.4	chr13_22287782_A_G_b38	rs9316871	0.66	Not an eGene	0.021
FOXO1	ENSG00000150907.7	chr13_22287782_A_G_b38	rs9316871	0.67	Not an eGene	-0.016
HLA-DQB1	ENSG00000179344.16	chr13_22287782_A_G_b38	rs9316871	0.67	0.00015	-0.028
WFS1	ENSG00000109501.13	chr13_22287782_A_G_b38	rs9316871	0.67	Not an eGene	0.012
MMP9	ENSG00000100985.7	chr13_22287782_A_G_b38	rs9316871	0.68	Not an eGene	-0.03
PGRMC1	ENSG00000101856.9	chr13_22287782_A_G_b38	rs9316871	0.72	0.00015	0.013
SGCA	ENSG00000108823.15	chr13_22287782_A_G_b38	rs9316871	0.73	8.5e-05	0.013
IGFBP3	ENSG00000146674.14	chr13_22287782_A_G_b38	rs9316871	0.74	0.00012	0.023
IGFBP6	ENSG00000167779.7	chr13_22287782_A_G_b38	rs9316871	0.74	Not an eGene	0.015
PEBP1	ENSG00000089220.4	chr13_22287782_A_G_b38	rs9316871	0.75	9e-05	0.013
CTSZ	ENSG00000101160.13	chr13_22287782_A_G_b38	rs9316871	0.77	Not an eGene	-0.0098
SLC25A4	ENSG00000151729.10	chr13_22287782_A_G_b38	rs9316871	0.79	5.2e-05	-0.0087
WDR82	ENSG00000164091.11	chr13_22287782_A_G_b38	rs9316871	0.79	0.0003	0.0075
TC2N	ENSG00000165929.12	chr13_22287782_A_G_b38	rs9316871	0.8	9.1e-05	-0.0092
TMEM14A	ENSG00000096092.5	chr13_22287782_A_G_b38	rs9316871	0.8	9.6e-05	0.01
FHL5	ENSG00000112214.10	chr13_22287782_A_G_b38	rs9316871	0.82	0.00018	-0.012
METTL7A	ENSG00000185432.11	chr13_22287782_A_G_b38	rs9316871	0.83	0.00019	-0.0058
CSPG4	ENSG00000173546.7	chr13_22287782_A_G_b38	rs9316871	0.84	Not an eGene	-0.0062
HIGD1A	ENSG00000181061.13	chr13_22287782_A_G_b38	rs9316871	0.84	0.00014	0.0069
NEXN	ENSG00000162614.18	chr13_22287782_A_G_b38	rs9316871	0.84	0.00016	-0.004
PPP1R14A	ENSG00000167641.10	chr13_22287782_A_G_b38	rs9316871	0.84	0.00019	0.0051
RBPMS2	ENSG00000166831.8	chr13_22287782_A_G_b38	rs9316871	0.84	0.0002	0.011
YIPF6	ENSG00000181704.11	chr13_22287782_A_G_b38	rs9316871	0.84	0.00015	0.0069
COX5B	ENSG00000135940.6	chr13_22287782_A_G_b38	rs9316871	0.85	Not an eGene	-0.0058
NUPR1	ENSG00000176046.8	chr13_22287782_A_G_b38	rs9316871	0.86	0.00016	0.01
GPD1L	ENSG00000152642.10	chr13_22287782_A_G_b38	rs9316871	0.87	7.8e-05	0.0056
JAG1	ENSG00000101384.11	chr13_22287782_A_G_b38	rs9316871	0.87	Not an eGene	-0.0068
MT1M	ENSG00000205364.3	chr13_22287782_A_G_b38	rs9316871	0.87	7.8e-05	-0.0076
RAMP1	ENSG00000132329.10	chr13_22287782_A_G_b38	rs9316871	0.87	9.5e-05	-0.0062
SMOC2	ENSG00000112562.18	chr13_22287782_A_G_b38	rs9316871	0.87	7.5e-05	-0.0077
AIF1L	ENSG00000126878.12	chr13_22287782_A_G_b38	rs9316871	0.88	8.3e-05	0.012
ADH1B	ENSG00000196616.13	chr13_22287782_A_G_b38	rs9316871	0.89	0.00014	0.0056
CBX6	ENSG00000183741.11	chr13_22287782_A_G_b38	rs9316871	0.89	0.0001	0.0043
KLHL9	ENSG00000198642.6	chr13_22287782_A_G_b38	rs9316871	0.89	Not an eGene	-0.0049
CRYAB	ENSG00000109846.7	chr13_22287782_A_G_b38	rs9316871	0.9	Not an eGene	0.0047
LSM2	ENSG00000204392.10	chr13_22287782_A_G_b38	rs9316871	0.9	0.00019	0.0049
PDLIM3	ENSG00000154553.13	chr13_22287782_A_G_b38	rs9316871	0.9	5.4e-05	0.0053
FHL1	ENSG00000022267.16	chr13_22287782_A_G_b38	rs9316871	0.92	0.00023	-0.0037
ZBTB16	ENSG00000109906.13	chr13_22287782_A_G_b38	rs9316871	0.93	Not an eGene	0.0028
CSRP2	ENSG00000175183.9	chr13_22287782_A_G_b38	rs9316871	0.94	0.00012	0.0029
ACTG2	ENSG00000163017.13	chr13_22287782_A_G_b38	rs9316871	0.95	Not an eGene	-0.0023
TCEAL2	ENSG00000184905.8	chr13_22287782_A_G_b38	rs9316871	0.95	Not an eGene	-0.0021
GFOD1	ENSG00000145990.10	chr13_22287782_A_G_b38	rs9316871	0.96	0.00012	0.0022
HBA2	ENSG00000188536.12	chr13_22287782_A_G_b38	rs9316871	0.96	Not an eGene	-0.0033
ZNF462	ENSG00000148143.12	chr13_22287782_A_G_b38	rs9316871	0.96	Not an eGene	-0.002
PHGDH	ENSG00000092621.11	chr13_22287782_A_G_b38	rs9316871	0.97	0.00016	-0.0021
ATP1A2	ENSG00000018625.14	chr13_22287782_A_G_b38	rs9316871	0.99	9.4e-05	-0.00045
HBB	ENSG00000244734.3	chr13_22287782_A_G_b38	rs9316871	0.99	Not an eGene	0.0012
ITGA10	ENSG00000143127.12	chr13_22287782_A_G_b38	rs9316871	1	0.0002	-0.00018
rs3827066
WDR82	ENSG00000164091.11	chr20_45957384_C_T_b38	rs3827066	0.0025	0.0003	0.12
PGRMC2	ENSG00000164040.16	chr20_45957384_C_T_b38	rs3827066	0.0062	0.00016	-0.18
C2orf40	ENSG00000119147.9	chr20_45957384_C_T_b38	rs3827066	0.017	0.0001	0.21
PALLD	ENSG00000129116.17	chr20_45957384_C_T_b38	rs3827066	0.041	0.00013	-0.075
KLF9	ENSG00000119138.4	chr20_45957384_C_T_b38	rs3827066	0.049	Not an eGene	0.1
CBX6	ENSG00000183741.11	chr20_45957384_C_T_b38	rs3827066	0.055	0.0001	0.09
MYH10	ENSG00000133026.12	chr20_45957384_C_T_b38	rs3827066	0.073	7.9e-05	0.083
GPD1L	ENSG00000152642.10	chr20_45957384_C_T_b38	rs3827066	0.077	7.8e-05	0.088
SGCA	ENSG00000108823.15	chr20_45957384_C_T_b38	rs3827066	0.11	8.5e-05	-0.086
THBS2	ENSG00000186340.14	chr20_45957384_C_T_b38	rs3827066	0.12	8.2e-05	0.085
YIPF6	ENSG00000181704.11	chr20_45957384_C_T_b38	rs3827066	0.12	0.00015	-0.076
PPP1R14A	ENSG00000167641.10	chr20_45957384_C_T_b38	rs3827066	0.13	0.00019	0.055
RGS5	ENSG00000143248.12	chr20_45957384_C_T_b38	rs3827066	0.15	0.0001	-0.072
TIMP4	ENSG00000157150.4	chr20_45957384_C_T_b38	rs3827066	0.15	0.00011	0.086
DUSP3	ENSG00000108861.8	chr20_45957384_C_T_b38	rs3827066	0.16	Not an eGene	0.078
NR2F6	ENSG00000160113.5	chr20_45957384_C_T_b38	rs3827066	0.16	6.9e-05	-0.082
ANKRD46	ENSG00000186106.11	chr20_45957384_C_T_b38	rs3827066	0.17	Not an eGene	-0.071
CYBRD1	ENSG00000071967.11	chr20_45957384_C_T_b38	rs3827066	0.17	0.00012	-0.11
KCNMB1	ENSG00000145936.8	chr20_45957384_C_T_b38	rs3827066	0.17	9.6e-05	0.077
LSM2	ENSG00000204392.10	chr20_45957384_C_T_b38	rs3827066	0.19	0.00019	-0.073
NXPH3	ENSG00000182575.7	chr20_45957384_C_T_b38	rs3827066	0.2	Not an eGene	-0.071
MGP	ENSG00000111341.9	chr20_45957384_C_T_b38	rs3827066	0.21	0.00014	0.069
SERPINA3	ENSG00000196136.17	chr20_45957384_C_T_b38	rs3827066	0.21	6.3e-05	-0.067
SLC25A4	ENSG00000151729.10	chr20_45957384_C_T_b38	rs3827066	0.21	5.2e-05	-0.058
BBX	ENSG00000114439.18	chr20_45957384_C_T_b38	rs3827066	0.24	Not an eGene	-0.05
FCN1	ENSG00000085265.10	chr20_45957384_C_T_b38	rs3827066	0.24	Not an eGene	0.11
FKBP5	ENSG00000096060.14	chr20_45957384_C_T_b38	rs3827066	0.24	Not an eGene	0.042
RABGAP1	ENSG00000011454.16	chr20_45957384_C_T_b38	rs3827066	0.24	0.00012	0.073
ITGA10	ENSG00000143127.12	chr20_45957384_C_T_b38	rs3827066	0.25	0.0002	-0.055
FAM46B	ENSG00000158246.7	chr20_45957384_C_T_b38	rs3827066	0.26	Not an eGene	0.07
SMOC2	ENSG00000112562.18	chr20_45957384_C_T_b38	rs3827066	0.27	7.5e-05	-0.073
IL2RB	ENSG00000100385.13	chr20_45957384_C_T_b38	rs3827066	0.28	Not an eGene	0.065
LMCD1	ENSG00000071282.11	chr20_45957384_C_T_b38	rs3827066	0.29	6.1e-05	-0.063
LTB	ENSG00000227507.2	chr20_45957384_C_T_b38	rs3827066	0.29	Not an eGene	-0.087
METTL7A	ENSG00000185432.11	chr20_45957384_C_T_b38	rs3827066	0.29	0.00019	-0.042
GMDS	ENSG00000112699.10	chr20_45957384_C_T_b38	rs3827066	0.3	6.4e-05	0.066
HSPB2	ENSG00000170276.5	chr20_45957384_C_T_b38	rs3827066	0.3	0.00014	0.051
NUPR1	ENSG00000176046.8	chr20_45957384_C_T_b38	rs3827066	0.32	0.00016	-0.08
RPL35A	ENSG00000182899.14	chr20_45957384_C_T_b38	rs3827066	0.33	Not an eGene	0.031
CCDC102A	ENSG00000135736.5	chr20_45957384_C_T_b38	rs3827066	0.34	8.6e-05	0.046
NEXN	ENSG00000162614.18	chr20_45957384_C_T_b38	rs3827066	0.35	0.00016	-0.026
TMEM47	ENSG00000147027.3	chr20_45957384_C_T_b38	rs3827066	0.35	0.00028	-0.042
TGFBR3	ENSG00000069702.10	chr20_45957384_C_T_b38	rs3827066	0.36	Not an eGene	0.059
CNN1	ENSG00000130176.7	chr20_45957384_C_T_b38	rs3827066	0.38	Not an eGene	0.031
MFAP4	ENSG00000166482.11	chr20_45957384_C_T_b38	rs3827066	0.38	Not an eGene	-0.052
PKD2	ENSG00000118762.7	chr20_45957384_C_T_b38	rs3827066	0.38	Not an eGene	0.032
RBPMS2	ENSG00000166831.8	chr20_45957384_C_T_b38	rs3827066	0.38	0.0002	0.069
COX7A1	ENSG00000161281.10	chr20_45957384_C_T_b38	rs3827066	0.39	0.00012	-0.046
ITK	ENSG00000113263.12	chr20_45957384_C_T_b38	rs3827066	0.39	Not an eGene	0.051
MYH11	ENSG00000133392.17	chr20_45957384_C_T_b38	rs3827066	0.39	Not an eGene	0.03
RASL12	ENSG00000103710.10	chr20_45957384_C_T_b38	rs3827066	0.39	Not an eGene	0.042
ATOH8	ENSG00000168874.12	chr20_45957384_C_T_b38	rs3827066	0.4	Not an eGene	0.045
DSTN	ENSG00000125868.15	chr20_45957384_C_T_b38	rs3827066	0.4	Not an eGene	0.032
NPTX2	ENSG00000106236.3	chr20_45957384_C_T_b38	rs3827066	0.4	0.00015	0.079
HSPB7	ENSG00000173641.17	chr20_45957384_C_T_b38	rs3827066	0.41	0.00011	-0.049
CHSY3	ENSG00000198108.3	chr20_45957384_C_T_b38	rs3827066	0.42	Not an eGene	-0.047
SRPX	ENSG00000101955.14	chr20_45957384_C_T_b38	rs3827066	0.42	0.00019	-0.056
IL6	ENSG00000136244.11	chr20_45957384_C_T_b38	rs3827066	0.44	Not an eGene	-0.053
IGFBP6	ENSG00000167779.7	chr20_45957384_C_T_b38	rs3827066	0.45	Not an eGene	-0.05
JAG1	ENSG00000101384.11	chr20_45957384_C_T_b38	rs3827066	0.45	Not an eGene	0.046
DACT3	ENSG00000197380.10	chr20_45957384_C_T_b38	rs3827066	0.46	Not an eGene	0.024
TRPC1	ENSG00000144935.14	chr20_45957384_C_T_b38	rs3827066	0.46	Not an eGene	0.034
FHL5	ENSG00000112214.10	chr20_45957384_C_T_b38	rs3827066	0.48	0.00018	-0.056
KLF15	ENSG00000163884.3	chr20_45957384_C_T_b38	rs3827066	0.48	Not an eGene	0.03
MT1M	ENSG00000205364.3	chr20_45957384_C_T_b38	rs3827066	0.48	7.8e-05	-0.046
PPP1R12C	ENSG00000125503.12	chr20_45957384_C_T_b38	rs3827066	0.48	Not an eGene	0.036
MMP9	ENSG00000100985.7	chr20_45957384_C_T_b38	rs3827066	0.49	Not an eGene	0.072
SIK1	ENSG00000142178.7	chr20_45957384_C_T_b38	rs3827066	0.5	0.0001	0.083
CLN5	ENSG00000102805.14	chr20_45957384_C_T_b38	rs3827066	0.51	Not an eGene	0.046
CSRP2	ENSG00000175183.9	chr20_45957384_C_T_b38	rs3827066	0.52	0.00012	-0.038
GFOD1	ENSG00000145990.10	chr20_45957384_C_T_b38	rs3827066	0.53	0.00012	-0.039
NFIA	ENSG00000162599.15	chr20_45957384_C_T_b38	rs3827066	0.53	Not an eGene	-0.027
MT1X	ENSG00000187193.8	chr20_45957384_C_T_b38	rs3827066	0.54	8.2e-05	-0.037
CSRP1	ENSG00000159176.13	chr20_45957384_C_T_b38	rs3827066	0.55	Not an eGene	0.028
HIGD1A	ENSG00000181061.13	chr20_45957384_C_T_b38	rs3827066	0.55	0.00014	-0.029
AIF1L	ENSG00000126878.12	chr20_45957384_C_T_b38	rs3827066	0.56	8.3e-05	0.067
GGNBP2	ENSG00000278311.4	chr20_45957384_C_T_b38	rs3827066	0.57	9.5e-05	-0.034
MAOA	ENSG00000189221.9	chr20_45957384_C_T_b38	rs3827066	0.57	0.00018	-0.022
SPARC	ENSG00000113140.10	chr20_45957384_C_T_b38	rs3827066	0.57	0.00011	-0.04
GLDN	ENSG00000186417.13	chr20_45957384_C_T_b38	rs3827066	0.58	0.00019	-0.05
FHL1	ENSG00000022267.16	chr20_45957384_C_T_b38	rs3827066	0.59	0.00023	-0.031
IGFBP2	ENSG00000115457.9	chr20_45957384_C_T_b38	rs3827066	0.59	8.3e-05	0.028
PXDN	ENSG00000130508.10	chr20_45957384_C_T_b38	rs3827066	0.59	Not an eGene	-0.033
RAMP1	ENSG00000132329.10	chr20_45957384_C_T_b38	rs3827066	0.59	9.5e-05	-0.029
HBB	ENSG00000244734.3	chr20_45957384_C_T_b38	rs3827066	0.6	Not an eGene	0.051
YAP1	ENSG00000137693.13	chr20_45957384_C_T_b38	rs3827066	0.6	Not an eGene	-0.02
FRZB	ENSG00000162998.4	chr20_45957384_C_T_b38	rs3827066	0.61	0.00016	0.032
HBA2	ENSG00000188536.12	chr20_45957384_C_T_b38	rs3827066	0.61	Not an eGene	0.048
CCL3	ENSG00000277632.1	chr20_45957384_C_T_b38	rs3827066	0.62	9.2e-05	-0.047
PEBP1	ENSG00000089220.4	chr20_45957384_C_T_b38	rs3827066	0.62	9e-05	-0.029
KLHL9	ENSG00000198642.6	chr20_45957384_C_T_b38	rs3827066	0.63	Not an eGene	-0.025
FAM129A	ENSG00000135842.16	chr20_45957384_C_T_b38	rs3827066	0.65	0.00015	-0.015
PDLIM3	ENSG00000154553.13	chr20_45957384_C_T_b38	rs3827066	0.65	5.4e-05	0.029
NDN	ENSG00000182636.5	chr20_45957384_C_T_b38	rs3827066	0.66	7.4e-05	-0.037
TMEM14A	ENSG00000096092.5	chr20_45957384_C_T_b38	rs3827066	0.66	9.6e-05	-0.027
FOSB	ENSG00000125740.13	chr20_45957384_C_T_b38	rs3827066	0.67	7.1e-05	0.035
FOXO1	ENSG00000150907.7	chr20_45957384_C_T_b38	rs3827066	0.68	Not an eGene	-0.022
TC2N	ENSG00000165929.12	chr20_45957384_C_T_b38	rs3827066	0.68	9.1e-05	-0.022
TCEAL2	ENSG00000184905.8	chr20_45957384_C_T_b38	rs3827066	0.68	Not an eGene	0.02
COX5B	ENSG00000135940.6	chr20_45957384_C_T_b38	rs3827066	0.69	Not an eGene	0.018
FMOD	ENSG00000122176.10	chr20_45957384_C_T_b38	rs3827066	0.69	7.7e-05	-0.026
GBP5	ENSG00000154451.14	chr20_45957384_C_T_b38	rs3827066	0.69	Not an eGene	-0.027
ATP1A2	ENSG00000018625.14	chr20_45957384_C_T_b38	rs3827066	0.71	9.4e-05	-0.018
ADH1A	ENSG00000187758.7	chr20_45957384_C_T_b38	rs3827066	0.73	0.00016	-0.034
KCNA5	ENSG00000130037.4	chr20_45957384_C_T_b38	rs3827066	0.73	8.9e-05	0.022
LIMCH1	ENSG00000064042.17	chr20_45957384_C_T_b38	rs3827066	0.73	9e-05	-0.018
WFS1	ENSG00000109501.13	chr20_45957384_C_T_b38	rs3827066	0.73	Not an eGene	-0.014
CRYAB	ENSG00000109846.7	chr20_45957384_C_T_b38	rs3827066	0.74	Not an eGene	-0.018
UCP2	ENSG00000175567.8	chr20_45957384_C_T_b38	rs3827066	0.75	0.00017	0.018
ACTG2	ENSG00000163017.13	chr20_45957384_C_T_b38	rs3827066	0.76	Not an eGene	0.017
EFHD1	ENSG00000115468.11	chr20_45957384_C_T_b38	rs3827066	0.76	0.0001	-0.013
NOV	ENSG00000136999.4	chr20_45957384_C_T_b38	rs3827066	0.76	0.00014	-0.014
PGRMC1	ENSG00000101856.9	chr20_45957384_C_T_b38	rs3827066	0.77	0.00015	-0.015
PPP1R3C	ENSG00000119938.8	chr20_45957384_C_T_b38	rs3827066	0.77	0.0002	0.02
DDIT4	ENSG00000168209.4	chr20_45957384_C_T_b38	rs3827066	0.78	Not an eGene	0.019
LMOD1	ENSG00000163431.12	chr20_45957384_C_T_b38	rs3827066	0.78	8.8e-05	0.013
AKR1C3	ENSG00000196139.13	chr20_45957384_C_T_b38	rs3827066	0.79	Not an eGene	0.019
PACSIN2	ENSG00000100266.18	chr20_45957384_C_T_b38	rs3827066	0.79	0.0001	0.016
AOC3	ENSG00000131471.6	chr20_45957384_C_T_b38	rs3827066	0.81	0.00022	0.016
CCR7	ENSG00000126353.3	chr20_45957384_C_T_b38	rs3827066	0.82	0.00015	0.019
CPE	ENSG00000109472.13	chr20_45957384_C_T_b38	rs3827066	0.82	0.00011	-0.013
CSNK2A2	ENSG00000070770.8	chr20_45957384_C_T_b38	rs3827066	0.83	Not an eGene	0.011
IGFBP3	ENSG00000146674.14	chr20_45957384_C_T_b38	rs3827066	0.83	0.00012	-0.021
SPARCL1	ENSG00000152583.12	chr20_45957384_C_T_b38	rs3827066	0.88	0.00016	0.0094
CALD1	ENSG00000122786.19	chr20_45957384_C_T_b38	rs3827066	0.89	Not an eGene	0.0059
KLHDC2	ENSG00000165516.10	chr20_45957384_C_T_b38	rs3827066	0.89	Not an eGene	-0.0074
IL1B	ENSG00000125538.11	chr20_45957384_C_T_b38	rs3827066	0.9	Not an eGene	0.011
ITGA8	ENSG00000077943.7	chr20_45957384_C_T_b38	rs3827066	0.9	0.0001	-0.0065
ADH1B	ENSG00000196616.13	chr20_45957384_C_T_b38	rs3827066	0.91	0.00014	0.0067
FERMT2	ENSG00000073712.14	chr20_45957384_C_T_b38	rs3827066	0.91	Not an eGene	0.0039
A2M	ENSG00000175899.14	chr20_45957384_C_T_b38	rs3827066	0.92	Not an eGene	-0.0066
SCRG1	ENSG00000164106.7	chr20_45957384_C_T_b38	rs3827066	0.92	Not an eGene	0.0059
CAP2	ENSG00000112186.11	chr20_45957384_C_T_b38	rs3827066	0.94	0.00011	0.0034
CSPG4	ENSG00000173546.7	chr20_45957384_C_T_b38	rs3827066	0.94	Not an eGene	-0.0037
CXXC5	ENSG00000171604.11	chr20_45957384_C_T_b38	rs3827066	0.95	0.00023	-0.003
PADI4	ENSG00000159339.13	chr20_45957384_C_T_b38	rs3827066	0.95	Not an eGene	-0.0067
PHGDH	ENSG00000092621.11	chr20_45957384_C_T_b38	rs3827066	0.95	0.00016	0.0051
RCAN2	ENSG00000172348.14	chr20_45957384_C_T_b38	rs3827066	0.98	9.6e-05	-0.0014
ZNF462	ENSG00000148143.12	chr20_45957384_C_T_b38	rs3827066	0.98	Not an eGene	0.0015
CTSZ	ENSG00000101160.13	chr20_45957384_C_T_b38	rs3827066	0.99	Not an eGene	0.00072
ZBTB16	ENSG00000109906.13	chr20_45957384_C_T_b38	rs3827066	0.99	Not an eGene	0.00058
HLA-DQB1	ENSG00000179344.16	chr20_45957384_C_T_b38	rs3827066	1	0.00015	-5.7e-06
rs2836411
RASL12	ENSG00000103710.10	chr21_38447907_C_T_b38	rs2836411	0.0095	Not an eGene	-0.078
LTB	ENSG00000227507.2	chr21_38447907_C_T_b38	rs2836411	0.019	Not an eGene	-0.12
IL2RB	ENSG00000100385.13	chr21_38447907_C_T_b38	rs2836411	0.023	Not an eGene	-0.085
YAP1	ENSG00000137693.13	chr21_38447907_C_T_b38	rs2836411	0.049	Not an eGene	-0.047
PPP1R3C	ENSG00000119938.8	chr21_38447907_C_T_b38	rs2836411	0.068	0.0002	-0.077
LMOD1	ENSG00000163431.12	chr21_38447907_C_T_b38	rs2836411	0.075	8.8e-05	-0.049
CXXC5	ENSG00000171604.11	chr21_38447907_C_T_b38	rs2836411	0.078	0.00023	0.052
ITGA8	ENSG00000077943.7	chr21_38447907_C_T_b38	rs2836411	0.082	0.0001	0.057
BBX	ENSG00000114439.18	chr21_38447907_C_T_b38	rs2836411	0.087	Not an eGene	-0.045
CCL3	ENSG00000277632.1	chr21_38447907_C_T_b38	rs2836411	0.093	9.2e-05	-0.098
DACT3	ENSG00000197380.10	chr21_38447907_C_T_b38	rs2836411	0.1	Not an eGene	-0.033
SPARCL1	ENSG00000152583.12	chr21_38447907_C_T_b38	rs2836411	0.1	0.00016	-0.061
RABGAP1	ENSG00000011454.16	chr21_38447907_C_T_b38	rs2836411	0.11	0.00012	-0.063
DDIT4	ENSG00000168209.4	chr21_38447907_C_T_b38	rs2836411	0.12	Not an eGene	-0.066
NR2F6	ENSG00000160113.5	chr21_38447907_C_T_b38	rs2836411	0.12	6.9e-05	0.057
NDN	ENSG00000182636.5	chr21_38447907_C_T_b38	rs2836411	0.13	7.4e-05	0.08
NXPH3	ENSG00000182575.7	chr21_38447907_C_T_b38	rs2836411	0.13	Not an eGene	-0.051
IGFBP3	ENSG00000146674.14	chr21_38447907_C_T_b38	rs2836411	0.14	0.00012	-0.091
JAG1	ENSG00000101384.11	chr21_38447907_C_T_b38	rs2836411	0.14	Not an eGene	-0.056
NPTX2	ENSG00000106236.3	chr21_38447907_C_T_b38	rs2836411	0.14	0.00015	0.086
TMEM47	ENSG00000147027.3	chr21_38447907_C_T_b38	rs2836411	0.14	0.00028	-0.041
MMP9	ENSG00000100985.7	chr21_38447907_C_T_b38	rs2836411	0.15	Not an eGene	-0.094
PACSIN2	ENSG00000100266.18	chr21_38447907_C_T_b38	rs2836411	0.15	0.0001	-0.054
KCNA5	ENSG00000130037.4	chr21_38447907_C_T_b38	rs2836411	0.17	8.9e-05	0.054
LIMCH1	ENSG00000064042.17	chr21_38447907_C_T_b38	rs2836411	0.17	9e-05	-0.045
NOV	ENSG00000136999.4	chr21_38447907_C_T_b38	rs2836411	0.17	0.00014	-0.039
GFOD1	ENSG00000145990.10	chr21_38447907_C_T_b38	rs2836411	0.18	0.00012	-0.051
ITGA10	ENSG00000143127.12	chr21_38447907_C_T_b38	rs2836411	0.18	0.0002	-0.039
EFHD1	ENSG00000115468.11	chr21_38447907_C_T_b38	rs2836411	0.22	0.0001	0.032
KCNMB1	ENSG00000145936.8	chr21_38447907_C_T_b38	rs2836411	0.22	9.6e-05	0.043
PPP1R12C	ENSG00000125503.12	chr21_38447907_C_T_b38	rs2836411	0.22	Not an eGene	-0.038
HLA-DQB1	ENSG00000179344.16	chr21_38447907_C_T_b38	rs2836411	0.23	0.00015	-0.072
SRPX	ENSG00000101955.14	chr21_38447907_C_T_b38	rs2836411	0.24	0.00019	-0.05
CPE	ENSG00000109472.13	chr21_38447907_C_T_b38	rs2836411	0.25	0.00011	-0.041
LMCD1	ENSG00000071282.11	chr21_38447907_C_T_b38	rs2836411	0.25	6.1e-05	-0.043
PKD2	ENSG00000118762.7	chr21_38447907_C_T_b38	rs2836411	0.25	Not an eGene	0.026
COX5B	ENSG00000135940.6	chr21_38447907_C_T_b38	rs2836411	0.26	Not an eGene	-0.031
MGP	ENSG00000111341.9	chr21_38447907_C_T_b38	rs2836411	0.26	0.00014	-0.039
FCN1	ENSG00000085265.10	chr21_38447907_C_T_b38	rs2836411	0.27	Not an eGene	-0.062
CSRP1	ENSG00000159176.13	chr21_38447907_C_T_b38	rs2836411	0.28	Not an eGene	-0.032
FKBP5	ENSG00000096060.14	chr21_38447907_C_T_b38	rs2836411	0.28	Not an eGene	-0.024
FMOD	ENSG00000122176.10	chr21_38447907_C_T_b38	rs2836411	0.28	7.7e-05	-0.043
ZBTB16	ENSG00000109906.13	chr21_38447907_C_T_b38	rs2836411	0.28	Not an eGene	-0.031
CCDC102A	ENSG00000135736.5	chr21_38447907_C_T_b38	rs2836411	0.29	8.6e-05	0.031
KLF9	ENSG00000119138.4	chr21_38447907_C_T_b38	rs2836411	0.3	Not an eGene	0.033
MFAP4	ENSG00000166482.11	chr21_38447907_C_T_b38	rs2836411	0.32	Not an eGene	0.036
MYH10	ENSG00000133026.12	chr21_38447907_C_T_b38	rs2836411	0.32	7.9e-05	0.028
PEBP1	ENSG00000089220.4	chr21_38447907_C_T_b38	rs2836411	0.32	9e-05	0.036
TRPC1	ENSG00000144935.14	chr21_38447907_C_T_b38	rs2836411	0.32	Not an eGene	-0.028
DUSP3	ENSG00000108861.8	chr21_38447907_C_T_b38	rs2836411	0.33	Not an eGene	0.033
PPP1R14A	ENSG00000167641.10	chr21_38447907_C_T_b38	rs2836411	0.33	0.00019	0.022
GLDN	ENSG00000186417.13	chr21_38447907_C_T_b38	rs2836411	0.36	0.00019	0.051
SMOC2	ENSG00000112562.18	chr21_38447907_C_T_b38	rs2836411	0.36	7.5e-05	-0.038
AOC3	ENSG00000131471.6	chr21_38447907_C_T_b38	rs2836411	0.37	0.00022	0.036
CSRP2	ENSG00000175183.9	chr21_38447907_C_T_b38	rs2836411	0.38	0.00012	0.031
FAM129A	ENSG00000135842.16	chr21_38447907_C_T_b38	rs2836411	0.38	0.00015	-0.018
KLF15	ENSG00000163884.3	chr21_38447907_C_T_b38	rs2836411	0.38	Not an eGene	-0.024
RBPMS2	ENSG00000166831.8	chr21_38447907_C_T_b38	rs2836411	0.38	0.0002	0.043
THBS2	ENSG00000186340.14	chr21_38447907_C_T_b38	rs2836411	0.38	8.2e-05	0.03
ATOH8	ENSG00000168874.12	chr21_38447907_C_T_b38	rs2836411	0.4	Not an eGene	-0.027
TC2N	ENSG00000165929.12	chr21_38447907_C_T_b38	rs2836411	0.41	9.1e-05	-0.027
WFS1	ENSG00000109501.13	chr21_38447907_C_T_b38	rs2836411	0.42	Not an eGene	-0.02
GMDS	ENSG00000112699.10	chr21_38447907_C_T_b38	rs2836411	0.43	6.4e-05	-0.031
FRZB	ENSG00000162998.4	chr21_38447907_C_T_b38	rs2836411	0.44	0.00016	0.03
PXDN	ENSG00000130508.10	chr21_38447907_C_T_b38	rs2836411	0.45	Not an eGene	0.028
CCR7	ENSG00000126353.3	chr21_38447907_C_T_b38	rs2836411	0.46	0.00015	-0.037
HIGD1A	ENSG00000181061.13	chr21_38447907_C_T_b38	rs2836411	0.46	0.00014	-0.022
MT1X	ENSG00000187193.8	chr21_38447907_C_T_b38	rs2836411	0.46	8.2e-05	-0.028
KLHDC2	ENSG00000165516.10	chr21_38447907_C_T_b38	rs2836411	0.47	Not an eGene	-0.024
YIPF6	ENSG00000181704.11	chr21_38447907_C_T_b38	rs2836411	0.47	0.00015	-0.022
IGFBP2	ENSG00000115457.9	chr21_38447907_C_T_b38	rs2836411	0.48	8.3e-05	0.023
IGFBP6	ENSG00000167779.7	chr21_38447907_C_T_b38	rs2836411	0.48	Not an eGene	0.029
CAP2	ENSG00000112186.11	chr21_38447907_C_T_b38	rs2836411	0.49	0.00011	-0.019
SIK1	ENSG00000142178.7	chr21_38447907_C_T_b38	rs2836411	0.49	0.0001	-0.053
HSPB7	ENSG00000173641.17	chr21_38447907_C_T_b38	rs2836411	0.5	0.00011	-0.025
SCRG1	ENSG00000164106.7	chr21_38447907_C_T_b38	rs2836411	0.5	Not an eGene	-0.024
FERMT2	ENSG00000073712.14	chr21_38447907_C_T_b38	rs2836411	0.52	Not an eGene	0.014
HBA2	ENSG00000188536.12	chr21_38447907_C_T_b38	rs2836411	0.54	Not an eGene	-0.036
KLHL9	ENSG00000198642.6	chr21_38447907_C_T_b38	rs2836411	0.55	Not an eGene	-0.02
ACTG2	ENSG00000163017.13	chr21_38447907_C_T_b38	rs2836411	0.56	Not an eGene	-0.02
DSTN	ENSG00000125868.15	chr21_38447907_C_T_b38	rs2836411	0.56	Not an eGene	0.014
CRYAB	ENSG00000109846.7	chr21_38447907_C_T_b38	rs2836411	0.57	Not an eGene	0.019
AIF1L	ENSG00000126878.12	chr21_38447907_C_T_b38	rs2836411	0.58	8.3e-05	0.04
CBX6	ENSG00000183741.11	chr21_38447907_C_T_b38	rs2836411	0.58	0.0001	0.016
FAM46B	ENSG00000158246.7	chr21_38447907_C_T_b38	rs2836411	0.58	Not an eGene	-0.021
NUPR1	ENSG00000176046.8	chr21_38447907_C_T_b38	rs2836411	0.58	0.00016	0.027
ADH1A	ENSG00000187758.7	chr21_38447907_C_T_b38	rs2836411	0.59	0.00016	-0.032
ATP1A2	ENSG00000018625.14	chr21_38447907_C_T_b38	rs2836411	0.59	9.4e-05	0.017
CSPG4	ENSG00000173546.7	chr21_38447907_C_T_b38	rs2836411	0.6	Not an eGene	-0.015
RCAN2	ENSG00000172348.14	chr21_38447907_C_T_b38	rs2836411	0.6	9.6e-05	-0.015
RGS5	ENSG00000143248.12	chr21_38447907_C_T_b38	rs2836411	0.62	0.0001	-0.015
COX7A1	ENSG00000161281.10	chr21_38447907_C_T_b38	rs2836411	0.64	0.00012	0.016
ITK	ENSG00000113263.12	chr21_38447907_C_T_b38	rs2836411	0.66	Not an eGene	0.016
MYH11	ENSG00000133392.17	chr21_38447907_C_T_b38	rs2836411	0.66	Not an eGene	0.0094
SPARC	ENSG00000113140.10	chr21_38447907_C_T_b38	rs2836411	0.66	0.00011	-0.019
NFIA	ENSG00000162599.15	chr21_38447907_C_T_b38	rs2836411	0.67	Not an eGene	0.011
PALLD	ENSG00000129116.17	chr21_38447907_C_T_b38	rs2836411	0.67	0.00013	0.0098
SGCA	ENSG00000108823.15	chr21_38447907_C_T_b38	rs2836411	0.67	8.5e-05	-0.014
GGNBP2	ENSG00000278311.4	chr21_38447907_C_T_b38	rs2836411	0.69	9.5e-05	-0.015
IL1B	ENSG00000125538.11	chr21_38447907_C_T_b38	rs2836411	0.7	Not an eGene	0.02
CHSY3	ENSG00000198108.3	chr21_38447907_C_T_b38	rs2836411	0.72	Not an eGene	-0.013
FHL5	ENSG00000112214.10	chr21_38447907_C_T_b38	rs2836411	0.72	0.00018	-0.018
PGRMC2	ENSG00000164040.16	chr21_38447907_C_T_b38	rs2836411	0.72	0.00016	-0.015
ANKRD46	ENSG00000186106.11	chr21_38447907_C_T_b38	rs2836411	0.73	Not an eGene	-0.011
C2orf40	ENSG00000119147.9	chr21_38447907_C_T_b38	rs2836411	0.73	0.0001	0.019
PHGDH	ENSG00000092621.11	chr21_38447907_C_T_b38	rs2836411	0.73	0.00016	0.019
ZNF462	ENSG00000148143.12	chr21_38447907_C_T_b38	rs2836411	0.74	Not an eGene	0.013
LSM2	ENSG00000204392.10	chr21_38447907_C_T_b38	rs2836411	0.75	0.00019	-0.011
FHL1	ENSG00000022267.16	chr21_38447907_C_T_b38	rs2836411	0.77	0.00023	0.01
AKR1C3	ENSG00000196139.13	chr21_38447907_C_T_b38	rs2836411	0.78	Not an eGene	-0.012
CTSZ	ENSG00000101160.13	chr21_38447907_C_T_b38	rs2836411	0.78	Not an eGene	0.0087
HBB	ENSG00000244734.3	chr21_38447907_C_T_b38	rs2836411	0.78	Not an eGene	-0.017
PADI4	ENSG00000159339.13	chr21_38447907_C_T_b38	rs2836411	0.79	Not an eGene	-0.018
GPD1L	ENSG00000152642.10	chr21_38447907_C_T_b38	rs2836411	0.8	7.8e-05	-0.0079
PDLIM3	ENSG00000154553.13	chr21_38447907_C_T_b38	rs2836411	0.8	5.4e-05	-0.01
RPL35A	ENSG00000182899.14	chr21_38447907_C_T_b38	rs2836411	0.8	Not an eGene	0.0049
TIMP4	ENSG00000157150.4	chr21_38447907_C_T_b38	rs2836411	0.8	0.00011	0.0091
ADH1B	ENSG00000196616.13	chr21_38447907_C_T_b38	rs2836411	0.81	0.00014	0.0094
RAMP1	ENSG00000132329.10	chr21_38447907_C_T_b38	rs2836411	0.81	9.5e-05	0.0079
CALD1	ENSG00000122786.19	chr21_38447907_C_T_b38	rs2836411	0.82	Not an eGene	0.0057
FOSB	ENSG00000125740.13	chr21_38447907_C_T_b38	rs2836411	0.82	7.1e-05	-0.011
PGRMC1	ENSG00000101856.9	chr21_38447907_C_T_b38	rs2836411	0.82	0.00015	0.0073
SERPINA3	ENSG00000196136.17	chr21_38447907_C_T_b38	rs2836411	0.82	6.3e-05	-0.0078
A2M	ENSG00000175899.14	chr21_38447907_C_T_b38	rs2836411	0.83	Not an eGene	0.0091
TCEAL2	ENSG00000184905.8	chr21_38447907_C_T_b38	rs2836411	0.83	Not an eGene	0.0066
UCP2	ENSG00000175567.8	chr21_38447907_C_T_b38	rs2836411	0.85	0.00017	-0.0067
WDR82	ENSG00000164091.11	chr21_38447907_C_T_b38	rs2836411	0.85	0.0003	-0.0048
MT1M	ENSG00000205364.3	chr21_38447907_C_T_b38	rs2836411	0.86	7.8e-05	-0.0073
CNN1	ENSG00000130176.7	chr21_38447907_C_T_b38	rs2836411	0.88	Not an eGene	0.0033
METTL7A	ENSG00000185432.11	chr21_38447907_C_T_b38	rs2836411	0.88	0.00019	-0.0037
CLN5	ENSG00000102805.14	chr21_38447907_C_T_b38	rs2836411	0.89	Not an eGene	0.0057
HSPB2	ENSG00000170276.5	chr21_38447907_C_T_b38	rs2836411	0.89	0.00014	0.0042
IL6	ENSG00000136244.11	chr21_38447907_C_T_b38	rs2836411	0.89	Not an eGene	-0.0057
FOXO1	ENSG00000150907.7	chr21_38447907_C_T_b38	rs2836411	0.91	Not an eGene	-0.0038
MAOA	ENSG00000189221.9	chr21_38447907_C_T_b38	rs2836411	0.91	0.00018	-0.0027
GBP5	ENSG00000154451.14	chr21_38447907_C_T_b38	rs2836411	0.92	Not an eGene	0.0042
CSNK2A2	ENSG00000070770.8	chr21_38447907_C_T_b38	rs2836411	0.94	Not an eGene	-0.0024
SLC25A4	ENSG00000151729.10	chr21_38447907_C_T_b38	rs2836411	0.94	5.2e-05	0.0022
TMEM14A	ENSG00000096092.5	chr21_38447907_C_T_b38	rs2836411	0.94	9.6e-05	-0.0029
NEXN	ENSG00000162614.18	chr21_38447907_C_T_b38	rs2836411	0.95	0.00016	-0.001
CYBRD1	ENSG00000071967.11	chr21_38447907_C_T_b38	rs2836411	0.97	0.00012	-0.0021
TGFBR3	ENSG00000069702.10	chr21_38447907_C_T_b38	rs2836411	0.98	Not an eGene	-0.0012
