# Supplementary material for: Identification of crucial genes in abdominal aortic aneurysm by WGCNA
Source: PeerJ journal article supplement (doi:10.7717/peerj.7873), 2019-10-08

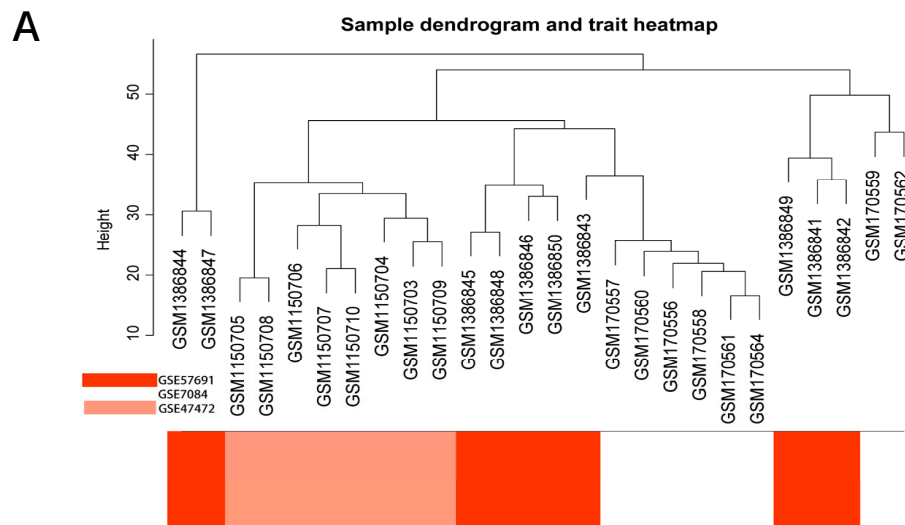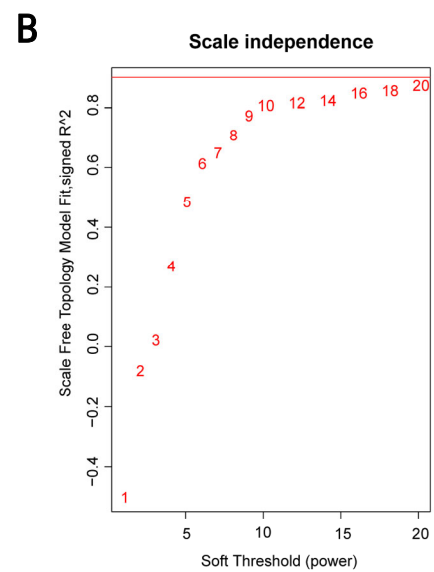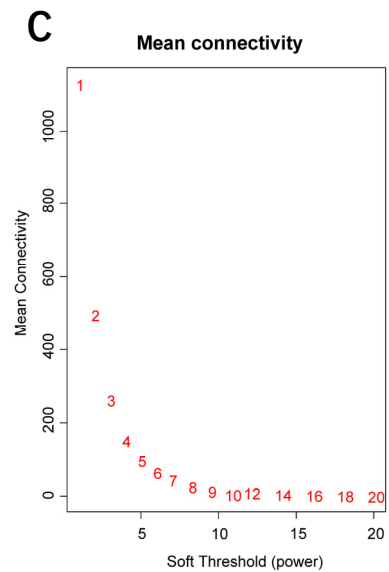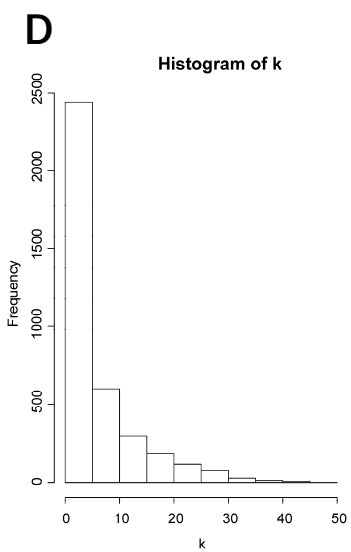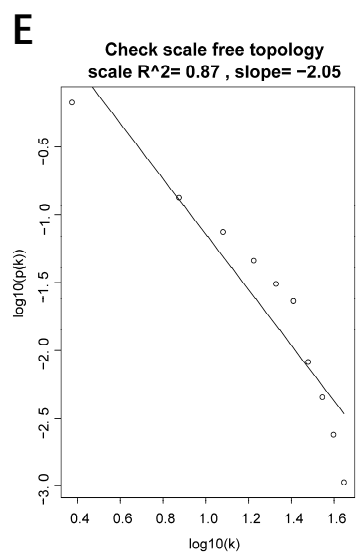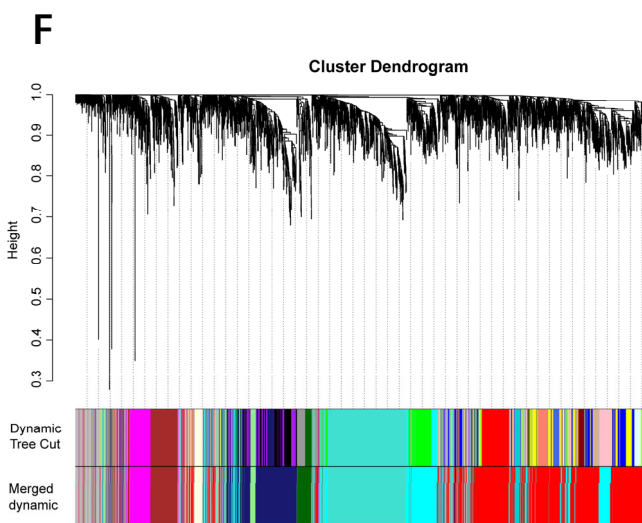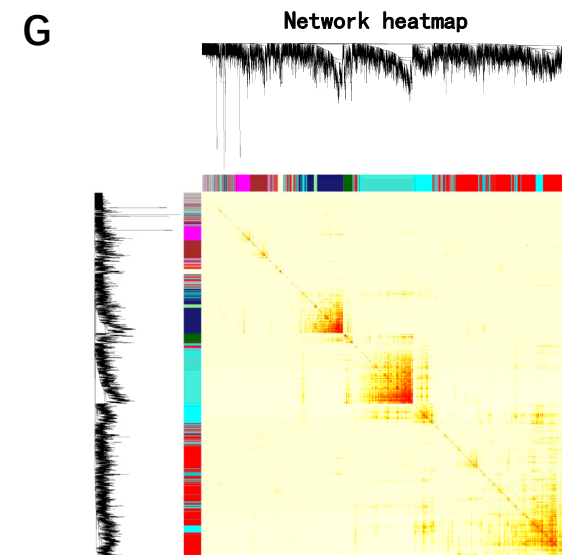

Supplement: Supplemental_Figure_S2.pdf [file Supplemental_Figure_S2.pdf]
